# Supplementary material for: The Requirement of Sox2 for the Spinal Cord Motor Neuron Development of Zebrafish
Source: Front Mol Neurosci. 2020 Mar 27;13:34. doi: 10.3389/fnmol.2020.00034 (PMC7135881; doi:10.3389/fnmol.2020.00034)
Supplement: Supplementary file 1 [file Table_1.XLS]

id	GeneId	Locus	FPKM_sample1	FPKM_sample2	log2FoldChange	test_stat	p_value	padj	significant	GeneSymbol	KO	GO
ENSDART00000000221	ENSDARG00000036830	19:5433425-5464284	92.6272	189.562	1.03316	12.0728	5e-05	0.000273814	Ups	krt91	K07604	biological_process:biological_process(GO:0008150)
ENSDART00000000392	ENSDARG00000000380	14:24708157-24736897	0.193725	0.655431	1.75843	2.99942	0.00085	0.00371048	Ups	pde6a	K08718	molecular_function:cyclic-nucleotide phosphodiesterase activity(GO:0004112);molecular_function:3',5'-cyclic-nucleotide phosphodiesterase activity(GO:0004114);molecular_function:3',5'-cyclic-AMP phosphodiesterase activity(GO:0004115);molecular_function:calmodulin-dependent cyclic-nucleotide phosphodiesterase activity(GO:0004117);molecular_function:cGMP-stimulated cyclic-nucleotide phosphodiesteras…
ENSDART00000002118	ENSDARG00000040002	5:24542082-24568907	7.99014	3.37746	-1.24228	-5.63192	5e-05	0.000273814	Down	pnpla7b	K14676	molecular_function:lysophospholipase activity(GO:0004622);cellular_component:endoplasmic reticulum(GO:0005783);biological_process:lipid metabolic process(GO:0006629);biological_process:metabolic process(GO:0008152);cellular_component:membrane(GO:0016020);cellular_component:integral component of membrane(GO:0016021);biological_process:developmental process(GO:0032502)
ENSDART00000002231	ENSDARG00000007671	21:20706239-20896022	2.42676	6.42604	1.4049	7.51042	5e-05	0.000273814	Ups	ghrb	_	cellular_component:membrane(GO:0016020);cellular_component:integral component of membrane(GO:0016021)
ENSDART00000002348	ENSDARG00000008306	22:10083190-10092198	0.312062	2.34988	2.91268	2.6974	0.0049	0.0175429	Ups	rdh5	K00061	biological_process:eye photoreceptor cell differentiation(GO:0001754);cellular_component:membrane(GO:0016020);cellular_component:integral component of membrane(GO:0016021);molecular_function:oxidoreductase activity(GO:0016491);biological_process:vitamin A biosynthetic process(GO:0035238);biological_process:retina development in camera-type eye(GO:0060041)
ENSDART00000002867	ENSDARG00000019746	12:3019706-3042662	5.15625	2.19814	-1.23004	-2.85705	0.00025	0.0012226	Down	rfng	K05948	cellular_component:Golgi apparatus(GO:0005794);biological_process:Notch signaling pathway(GO:0007219);biological_process:multicellular organismal development(GO:0007275);biological_process:pattern specification process(GO:0007389);biological_process:nervous system development(GO:0007399);cellular_component:membrane(GO:0016020);cellular_component:integral component of membrane(GO:0016021);molecula…
ENSDART00000003193	ENSDARG00000010317	9:31265309-31355656	0.897247	0.387512	-1.21126	-1.926	0.0124	0.0391853	Down	gpr183a	K04305	biological_process:adaptive immune response(GO:0002250);biological_process:adaptive immune response(GO:0002250);biological_process:B cell activation involved in immune response(GO:0002312);biological_process:immune system process(GO:0002376);biological_process:dendritic cell chemotaxis(GO:0002407);molecular_function:signal transducer activity(GO:0004871);molecular_function:G-protein coupled recep…
ENSDART00000003210	ENSDARG00000020237	18:31247955-31249283	0.452142	1.72877	1.9349	3.17835	0.00065	0.00291114	Ups	mc1r	K04199	molecular_function:signal transducer activity(GO:0004871);molecular_function:G-protein coupled receptor activity(GO:0004930);molecular_function:melanocortin receptor activity(GO:0004977);molecular_function:melanocyte-stimulating hormone receptor activity(GO:0004980);molecular_function:protein binding(GO:0005515);cellular_component:plasma membrane(GO:0005886);cellular_component:plasma membrane(GO:…
ENSDART00000003293	ENSDARG00000034871	14:27936332-28084563	2.27877	0.790446	-1.52752	-3.05123	0.0001	0.0005238	Down	mid2	_	cellular_component:intracellular(GO:0005622);molecular_function:zinc ion binding(GO:0008270);molecular_function:metal ion binding(GO:0046872)
ENSDART00000003665	ENSDARG00000005485	25:7858886-7864844	7.19129	14.7997	1.04124	2.7163	0.00045	0.00208841	Ups	ucmab	_	molecular_function:molecular_function(GO:0003674);cellular_component:extracellular region(GO:0005576);cellular_component:proteinaceous extracellular matrix(GO:0005578);biological_process:regulation of osteoblast differentiation(GO:0045667);biological_process:embryonic skeletal system development(GO:0048706)
ENSDART00000003926	ENSDARG00000021366	5:44054985-44243585	6.32339	13.0961	1.05037	2.89904	5e-05	0.000273814	Ups	fbp1a	K03841	cellular_component:cytosol(GO:0005829);biological_process:carbohydrate metabolic process(GO:0005975);biological_process:sucrose biosynthetic process(GO:0005986);biological_process:fructose metabolic process(GO:0006000);biological_process:fructose catabolic process(GO:0006001);biological_process:fructose 6-phosphate metabolic process(GO:0006002);biological_process:gluconeogenesis(GO:0006094);molec…
ENSDART00000004062	ENSDARG00000014313	1:614902-619459	2.46617	7.10097	1.52574	2.36926	0.0058	0.0203222	Ups	atp5j	K02131	cellular_component:mitochondrial proton-transporting ATP synthase complex, coupling factor F(o)(GO:0000276);cellular_component:mitochondrion(GO:0005739);cellular_component:mitochondrial inner membrane(GO:0005743);biological_process:transport(GO:0006810);biological_process:ion transport(GO:0006811);molecular_function:hydrogen ion transmembrane transporter activity(GO:0015078);biological_process:AT…
ENSDART00000004092	ENSDARG00000013659	20:51888727-51915955	1.37635	0.37586	-1.87258	-2.30217	0.00425	0.0155181	Down	brox	_	molecular_function:molecular_function(GO:0003674);biological_process:biological_process(GO:0008150);cellular_component:membrane(GO:0016020)
ENSDART00000004222	ENSDARG00000015278	4:18293669-18328628	0.713613	0.253098	-1.49544	-3.09074	0.0003	0.00143914	Down	plxnc1	K06572	cellular_component:semaphorin receptor complex(GO:0002116);cellular_component:integral component of plasma membrane(GO:0005887);biological_process:signal transduction(GO:0007165);cellular_component:membrane(GO:0016020);cellular_component:integral component of membrane(GO:0016021);molecular_function:semaphorin receptor activity(GO:0017154);molecular_function:semaphorin receptor activity(GO:0017154…
ENSDART00000004357	ENSDARG00000077405	23:45487011-45605143	22.3019	0.164796	-7.08034	-11.0761	5e-05	0.000273814	Down	si:ch211-116m6.3	_	_
ENSDART00000004498	ENSDARG00000037203	9:748315-760069	4.64722	2.08174	-1.15858	-8.83623	5e-05	0.000273814	Down	insig2	_	cellular_component:endoplasmic reticulum(GO:0005783);cellular_component:endoplasmic reticulum membrane(GO:0005789);biological_process:lipid metabolic process(GO:0006629);biological_process:steroid metabolic process(GO:0008202);biological_process:cholesterol metabolic process(GO:0008203);cellular_component:membrane(GO:0016020);cellular_component:integral component of membrane(GO:0016021)
ENSDART00000004514	ENSDARG00000034885	19:41312789-41319041	10.4638	32.2463	1.62373	9.52541	5e-05	0.000273814	Ups	bet1	K08504	molecular_function:molecular_function(GO:0003674);biological_process:biological_process(GO:0008150);cellular_component:membrane(GO:0016020);cellular_component:integral component of membrane(GO:0016021)
ENSDART00000004842	ENSDARG00000009844	20:43216386-43221333	0.712445	1.76126	1.30576	2.52717	0.00425	0.0155181	Ups	dusp23a	K14165	molecular_function:protein serine/threonine phosphatase activity(GO:0004722);molecular_function:protein tyrosine phosphatase activity(GO:0004725);molecular_function:protein tyrosine phosphatase activity(GO:0004725);cellular_component:nucleus(GO:0005634);cellular_component:cytoplasm(GO:0005737);biological_process:protein dephosphorylation(GO:0006470);molecular_function:protein tyrosine/serine/thre…
ENSDART00000005568	ENSDARG00000014248	14:29435087-29459793	4.07986	1.66343	-1.29435	-3.78481	5e-05	0.000273814	Down	pdlim3b	_	molecular_function:zinc ion binding(GO:0008270);molecular_function:metal ion binding(GO:0046872)
ENSDART00000005895	ENSDARG00000018263	1:9270377-9280654	2.62406	0.859914	-1.60953	-4.72031	5e-05	0.000273814	Down	pdia2	K09581	molecular_function:protein disulfide isomerase activity(GO:0003756);molecular_function:protein disulfide isomerase activity(GO:0003756);cellular_component:endoplasmic reticulum(GO:0005783);cellular_component:endoplasmic reticulum(GO:0005783);biological_process:protein folding(GO:0006457);molecular_function:isomerase activity(GO:0016853);molecular_function:peptidyl-proline 4-dioxygenase activity(G…
ENSDART00000006971	ENSDARG00000010385	21:39417461-39501679	0.337174	0.904341	1.42337	2.52749	0.00315	0.0119064	Ups	sept4a	K16943	molecular_function:nucleotide binding(GO:0000166);molecular_function:GTP binding(GO:0005525)
ENSDART00000007202	ENSDARG00000012632	12:48761790-48767912	4.04913	11.9847	1.56551	3.71188	5e-05	0.000273814	Ups	zgc:92749	_	cellular_component:endoplasmic reticulum(GO:0005783);biological_process:lipid metabolic process(GO:0006629);biological_process:fatty acid metabolic process(GO:0006631);biological_process:fatty acid biosynthetic process(GO:0006633);molecular_function:fatty acid elongase activity(GO:0009922);molecular_function:fatty acid elongase activity(GO:0009922);cellular_component:membrane(GO:0016020);cellular…
ENSDART00000007211	ENSDARG00000013245	13:28449906-28466315	6.76501	3.23508	-1.06429	-4.44543	5e-05	0.000273814	Down	wbp1la	_	cellular_component:membrane(GO:0016020);cellular_component:integral component of membrane(GO:0016021)
ENSDART00000007293	ENSDARG00000007344	3:21110045-21111912	3.92204	0.626829	-2.64546	-5.39268	5e-05	0.000273814	Down	tcap	K19879	cellular_component:Z disc(GO:0030018);biological_process:T-tubule organization(GO:0033292);biological_process:muscle cell development(GO:0055001);biological_process:heart contraction(GO:0060047)
ENSDART00000007401	ENSDARG00000009493	9:53151080-53274697	0.754358	1.54225	1.03171	4.82314	5e-05	0.000273814	Ups	MAP3K13	K04422	molecular_function:nucleotide binding(GO:0000166);biological_process:activation of MAPKK activity(GO:0000186);molecular_function:protein kinase activity(GO:0004672);molecular_function:protein serine/threonine kinase activity(GO:0004674);molecular_function:MAP kinase kinase kinase activity(GO:0004709);molecular_function:ATP binding(GO:0005524);biological_process:protein phosphorylation(GO:0006468)…
ENSDART00000007498	ENSDARG00000052708	6:54796408-54816373	2.05158	0.666607	-1.62183	-2.6203	0.0044	0.0159989	Down	tnni1b	K10371	biological_process:skeletal muscle contraction(GO:0003009);molecular_function:molecular_function(GO:0003674);cellular_component:troponin complex(GO:0005861);cellular_component:troponin complex(GO:0005861);biological_process:heart development(GO:0007507);biological_process:cardiac muscle contraction(GO:0060048)
ENSDART00000007770	ENSDARG00000018611	1:30799421-30801521	7.10353	2.35235	-1.59443	-7.12393	5e-05	0.000273814	Down	lbx1b	_	molecular_function:DNA binding(GO:0003677);cellular_component:nucleus(GO:0005634);biological_process:regulation of transcription, DNA-templated(GO:0006355);molecular_function:sequence-specific DNA binding(GO:0043565)
ENSDART00000007856	ENSDARG00000001976	18:25667066-25759104	1.62067	6.6959	2.04669	7.52482	5e-05	0.000273814	Ups	fkbp16	K09574	biological_process:protein folding(GO:0006457);cellular_component:membrane(GO:0016020);cellular_component:integral component of membrane(GO:0016021)
ENSDART00000007913	ENSDARG00000007141	7:38235747-38419169	1.38267	2.98097	1.10832	1.94639	0.0047	0.0169267	Ups	psmc3	_	molecular_function:nucleotide binding(GO:0000166);cellular_component:proteasome complex(GO:0000502);molecular_function:ATP binding(GO:0005524);cellular_component:cytoplasm(GO:0005737);molecular_function:hydrolase activity(GO:0016787);biological_process:protein catabolic process(GO:0030163)
ENSDART00000007961	ENSDARG00000034852	10:17502923-17585588	12.542	6.2123	-1.01357	-2.31703	0.0046	0.0166309	Down	nt5c2l1	_	molecular_function:5'-nucleotidase activity(GO:0008253);molecular_function:metal ion binding(GO:0046872);biological_process:cellular response to xenobiotic stimulus(GO:0071466)
ENSDART00000008816	ENSDARG00000011235	17:44130893-44139202	2.88845	7.79867	1.43293	2.5022	0.0012	0.00505884	Ups	otx2	K18490	biological_process:retinal pigment epithelium development(GO:0003406);molecular_function:DNA binding(GO:0003677);molecular_function:sequence-specific DNA binding transcription factor activity(GO:0003700);cellular_component:nucleus(GO:0005634);biological_process:regulation of transcription, DNA-templated(GO:0006355);biological_process:multicellular organismal development(GO:0007275);biological_pro…
ENSDART00000009151	ENSDARG00000039935	3:8445843-8766102	0.187275	0.59998	1.67976	2.25134	0.00895	0.0295152	Ups	CABZ01064672.1	_	_
ENSDART00000010942	ENSDARG00000043905	21:41807148-41848869	2.0826	5.18224	1.31519	2.70013	0.00185	0.00743006	Ups	rnf14	K11971	cellular_component:ubiquitin ligase complex(GO:0000151);biological_process:protein polyubiquitination(GO:0000209);molecular_function:ubiquitin-protein transferase activity(GO:0004842);cellular_component:nucleus(GO:0005634);cellular_component:cytoplasm(GO:0005737);molecular_function:zinc ion binding(GO:0008270);biological_process:protein ubiquitination(GO:0016567);molecular_function:ubiquitin conj…
ENSDART00000011597	ENSDARG00000042477	8:53026461-53483663	1.75909	0.553531	-1.6681	-2.66603	0.0035	0.0130631	Down	nr2c2	K08544	molecular_function:DNA binding(GO:0003677);molecular_function:sequence-specific DNA binding transcription factor activity(GO:0003700);molecular_function:steroid hormone receptor activity(GO:0003707);cellular_component:nucleus(GO:0005634);biological_process:transcription, DNA-templated(GO:0006351);biological_process:regulation of transcription, DNA-templated(GO:0006355);molecular_function:zinc ion…
ENSDART00000012119	ENSDARG00000004167	2:7260674-7276843	5.31581	1.03741	-2.35731	-3.9008	5e-05	0.000273814	Down	zgc:110366	_	cellular_component:cellular_component(GO:0005575);molecular_function:oxidoreductase activity(GO:0016491);biological_process:oxidation-reduction process(GO:0055114)
ENSDART00000012604	ENSDARG00000017127	22:16529668-16540545	0.687989	2.27286	1.72405	7.30553	5e-05	0.000273814	Ups	pdzk1ip1	_	cellular_component:membrane(GO:0016020);cellular_component:integral component of membrane(GO:0016021);biological_process:hemopoiesis(GO:0030097)
ENSDART00000012718	ENSDARG00000002311	16:16240783-16244222	2.142	10.3524	2.27293	5.47094	5e-05	0.000273814	Ups	fabp11b	_	molecular_function:transporter activity(GO:0005215);cellular_component:cellular_component(GO:0005575);biological_process:transport(GO:0006810);molecular_function:lipid binding(GO:0008289);biological_process:response to vitamin B3(GO:0033552);biological_process:response to prostaglandin(GO:0034694)
ENSDART00000012940	ENSDARG00000007195	11:35896292-35968163	1.15824	0.386408	-1.58373	-3.05541	0.00135	0.00560823	Down	grm2b	K04605	_
ENSDART00000013263	ENSDARG00000019838	1:22592792-22604014	9.39245	20.8214	1.1485	8.11464	5e-05	0.000273814	Ups	ugdh	K00012	biological_process:heart valve formation(GO:0003188);biological_process:atrioventricular valve formation(GO:0003190);molecular_function:UDP-glucose 6-dehydrogenase activity(GO:0003979);molecular_function:UDP-glucose 6-dehydrogenase activity(GO:0003979);cellular_component:nucleus(GO:0005634);cellular_component:cytosol(GO:0005829);biological_process:carbohydrate metabolic process(GO:0005975);biolog…
ENSDART00000013465	ENSDARG00000011785	12:3875778-3886305	1.87658	0.699997	-1.42268	-4.90602	5e-05	0.000273814	Down	tbx6	K10180	cellular_component:chromatin(GO:0000785);biological_process:somitogenesis(GO:0001756);molecular_function:DNA binding(GO:0003677);molecular_function:sequence-specific DNA binding transcription factor activity(GO:0003700);molecular_function:protein binding(GO:0005515);cellular_component:nucleus(GO:0005634);biological_process:transcription, DNA-templated(GO:0006351);biological_process:regulation of …
ENSDART00000013591	ENSDARG00000003641	9:30301676-30318014	4.5097	56.7983	3.65474	8.97035	5e-05	0.000273814	Ups	tfg	K09292	_
ENSDART00000013745	ENSDARG00000004082	5:23118376-23245548	9.42321	4.56305	-1.04622	-3.22674	5e-05	0.000273814	Down	cx39.9	K07612	cellular_component:plasma membrane(GO:0005886);cellular_component:gap junction(GO:0005921);cellular_component:connexon complex(GO:0005922);biological_process:cell communication(GO:0007154);biological_process:cell communication by electrical coupling(GO:0010644);cellular_component:membrane(GO:0016020);cellular_component:integral component of membrane(GO:0016021);cellular_component:cell junction(GO…
ENSDART00000013980	ENSDARG00000004473	12:28634286-28655915	1.3174	0.627684	-1.06959	-2.86828	0.00055	0.00250382	Down	tbx21	_	molecular_function:DNA binding(GO:0003677);molecular_function:sequence-specific DNA binding transcription factor activity(GO:0003700);cellular_component:nucleus(GO:0005634);biological_process:transcription, DNA-templated(GO:0006351);biological_process:regulation of transcription, DNA-templated(GO:0006355)
ENSDART00000014098	ENSDARG00000005085	16:54000889-54023177	9.58107	19.5836	1.03139	5.70356	5e-05	0.000273814	Ups	ggctb	_	molecular_function:gamma-glutamylcyclotransferase activity(GO:0003839);biological_process:glutathione biosynthetic process(GO:0006750);molecular_function:transferase activity(GO:0016740)
ENSDART00000014350	ENSDARG00000010192	2:47517818-47578737	5.44193	0.807973	-2.75174	-3.13755	0.0007	0.00311162	Down	pax3a	_	biological_process:neural crest cell migration(GO:0001755);molecular_function:DNA binding(GO:0003677);molecular_function:sequence-specific DNA binding transcription factor activity(GO:0003700);cellular_component:nucleus(GO:0005634);cellular_component:nucleus(GO:0005634);biological_process:transcription, DNA-templated(GO:0006351);biological_process:regulation of transcription, DNA-templated(GO:000…
ENSDART00000014632	ENSDARG00000005456	7:51883754-52010260	7.98382	3.27313	-1.28641	-4.57109	5e-05	0.000273814	Down	katnb1	K18643	cellular_component:spindle pole(GO:0000922);cellular_component:cytoplasm(GO:0005737);cellular_component:centrosome(GO:0005813);cellular_component:cytoskeleton(GO:0005856);cellular_component:microtubule(GO:0005874);biological_process:cell cycle(GO:0007049);biological_process:mitotic nuclear division(GO:0007067);biological_process:brain development(GO:0007420);molecular_function:microtubule binding…
ENSDART00000014685	ENSDARG00000011769	4:24019679-24038238	0.925027	2.36649	1.35518	2.65248	0.00455	0.01648	Ups	cpm	K01296	molecular_function:metallocarboxypeptidase activity(GO:0004181);molecular_function:metallocarboxypeptidase activity(GO:0004181);molecular_function:serine-type carboxypeptidase activity(GO:0004185);cellular_component:extracellular space(GO:0005615);cellular_component:plasma membrane(GO:0005886);biological_process:proteolysis(GO:0006508);biological_process:peptide metabolic process(GO:0006518);mole…
ENSDART00000014691	ENSDARG00000015835	23:44470356-44884854	22.2395	6.43564	-1.78897	-2.6695	5e-05	0.000273814	Down	eif4e2rs1	K03259	molecular_function:RNA binding(GO:0003723);molecular_function:translation initiation factor activity(GO:0003743);cellular_component:cytoplasm(GO:0005737);biological_process:translation(GO:0006412);biological_process:translational initiation(GO:0006413)
ENSDART00000014806	ENSDARG00000016536	5:22287885-22326924	0.449902	1.05754	1.23303	3.10423	0.0001	0.0005238	Ups	npas2	K09026	molecular_function:DNA binding(GO:0003677);molecular_function:double-stranded DNA binding(GO:0003690);molecular_function:sequence-specific DNA binding transcription factor activity(GO:0003700);cellular_component:nucleus(GO:0005634);cellular_component:transcription factor complex(GO:0005667);cellular_component:transcription factor complex(GO:0005667);cellular_component:cytoplasm(GO:0005737);biolog…
ENSDART00000014877	ENSDARG00000014891	15:39249948-39384044	1.9021	0.73829	-1.36533	-3.3001	5e-05	0.000273814	Down	robo2	K06754	biological_process:kidney development(GO:0001822);molecular_function:protein binding(GO:0005515);biological_process:axon guidance(GO:0007411);biological_process:axon guidance(GO:0007411);biological_process:axonal fasciculation(GO:0007413);biological_process:heart development(GO:0007507);cellular_component:membrane(GO:0016020);cellular_component:integral component of membrane(GO:0016021);biologica…
ENSDART00000016071	ENSDARG00000017748	2:15459827-15529330	5.41045	2.19682	-1.30033	-3.27901	5e-05	0.000273814	Down	arhgap29b	K20644	molecular_function:GTPase activator activity(GO:0005096);biological_process:signal transduction(GO:0007165);biological_process:intracellular signal transduction(GO:0035556);molecular_function:metal ion binding(GO:0046872)
ENSDART00000016405	ENSDARG00000016213	3:53256191-53268676	0.8988	0.39259	-1.19498	-2.45598	0.00195	0.00777689	Down	BX088711.1	K11150	_
ENSDART00000016607	ENSDARG00000017860	2:7004144-7047710	1.20309	0.435275	-1.46675	-1.99392	0.01085	0.0349032	Down	rgs5b	K16449	molecular_function:GTPase activator activity(GO:0005096);cellular_component:cytoplasm(GO:0005737);cellular_component:plasma membrane(GO:0005886)
ENSDART00000016750	ENSDARG00000101495	1:8873100-9028191	1.49866	3.58926	1.26001	4.39831	5e-05	0.000273814	Ups	ugt5b2	_	biological_process:metabolic process(GO:0008152);biological_process:flavonoid biosynthetic process(GO:0009813);molecular_function:glucuronosyltransferase activity(GO:0015020);cellular_component:membrane(GO:0016020);cellular_component:integral component of membrane(GO:0016021);molecular_function:transferase activity(GO:0016740);molecular_function:transferase activity, transferring hexosyl groups(G…
ENSDART00000016960	ENSDARG00000020656	13:40689121-40833599	1.14592	0.445663	-1.36248	-2.64097	0.00135	0.00560823	Down	prkg1a	K07376	molecular_function:nucleotide binding(GO:0000166);molecular_function:protein kinase activity(GO:0004672);molecular_function:protein serine/threonine kinase activity(GO:0004674);molecular_function:cGMP-dependent protein kinase activity(GO:0004692);molecular_function:ATP binding(GO:0005524);biological_process:protein phosphorylation(GO:0006468);molecular_function:kinase activity(GO:0016301);biologi…
ENSDART00000017155	ENSDARG00000010423	7:38235747-38419169	3.97945	17.6887	2.15219	2.65012	0.002	0.00795471	Ups	npsn	_	molecular_function:metalloendopeptidase activity(GO:0004222);cellular_component:cellular_component(GO:0005575);biological_process:proteolysis(GO:0006508);molecular_function:peptidase activity(GO:0008233);molecular_function:metallopeptidase activity(GO:0008237);molecular_function:zinc ion binding(GO:0008270);molecular_function:hydrolase activity(GO:0016787);molecular_function:metal ion binding(GO:…
ENSDART00000017619	ENSDARG00000042336	18:8847555-8884799	1.05052	2.19948	1.06606	3.71102	5e-05	0.000273814	Ups	impdh1a	K00088	molecular_function:nucleotide binding(GO:0000166);biological_process:eye development(GO:0001654);molecular_function:catalytic activity(GO:0003824);molecular_function:IMP dehydrogenase activity(GO:0003938);molecular_function:IMP dehydrogenase activity(GO:0003938);cellular_component:nucleus(GO:0005634);cellular_component:cytoplasm(GO:0005737);cellular_component:cytoplasm(GO:0005737);biological_proc…
ENSDART00000018401	ENSDARG00000011515	8:40236763-40248638	1.94464	0.289864	-2.74606	-5.54955	5e-05	0.000273814	Down	orai1a	_	biological_process:store-operated calcium entry(GO:0002115);molecular_function:store-operated calcium channel activity(GO:0015279);cellular_component:membrane(GO:0016020);cellular_component:membrane(GO:0016020);cellular_component:integral component of membrane(GO:0016021)
ENSDART00000018432	ENSDARG00000019122	22:14026833-14090589	278.075	805.768	1.53489	26.159	5e-05	0.000273814	Ups	he1b	K18543	molecular_function:metalloendopeptidase activity(GO:0004222);biological_process:proteolysis(GO:0006508);biological_process:proteolysis(GO:0006508);molecular_function:peptidase activity(GO:0008233);molecular_function:metallopeptidase activity(GO:0008237);molecular_function:metallopeptidase activity(GO:0008237);molecular_function:zinc ion binding(GO:0008270);molecular_function:hydrolase activity(GO…
ENSDART00000018448	ENSDARG00000005315	7:38235747-38419169	9.54983	2.57841	-1.88899	-5.78245	5e-05	0.000273814	Down	celf1	K13207	molecular_function:nucleotide binding(GO:0000166);biological_process:liver development(GO:0001889);molecular_function:nucleic acid binding(GO:0003676);molecular_function:RNA binding(GO:0003723);molecular_function:mRNA binding(GO:0003729);molecular_function:mRNA binding(GO:0003729);molecular_function:mRNA 3'-UTR binding(GO:0003730);cellular_component:nucleus(GO:0005634);cellular_component:cytoplas…
ENSDART00000018741	ENSDARG00000013802	1:127249-596152	6.68321	17.1603	1.36047	2.71338	0.0004	0.00187349	Ups	pcid2	_	cellular_component:cellular_component(GO:0005575)
ENSDART00000018934	ENSDARG00000032761	8:16954048-17009195	1.81076	0.660536	-1.45488	-2.05391	0.0064	0.0221138	Down	pde4d	K13293	molecular_function:cyclic-nucleotide phosphodiesterase activity(GO:0004112);molecular_function:3',5'-cyclic-nucleotide phosphodiesterase activity(GO:0004114);molecular_function:3',5'-cyclic-AMP phosphodiesterase activity(GO:0004115);molecular_function:calmodulin-dependent cyclic-nucleotide phosphodiesterase activity(GO:0004117);molecular_function:cGMP-stimulated cyclic-nucleotide phosphodiesteras…
ENSDART00000019104	ENSDARG00000012366	5:44054985-44243585	1.46076	4.47301	1.61453	3.33497	5e-05	0.000273814	Ups	fbp2	K03841	cellular_component:cytosol(GO:0005829);biological_process:carbohydrate metabolic process(GO:0005975);biological_process:sucrose biosynthetic process(GO:0005986);biological_process:fructose metabolic process(GO:0006000);biological_process:fructose catabolic process(GO:0006001);biological_process:fructose 6-phosphate metabolic process(GO:0006002);biological_process:gluconeogenesis(GO:0006094);molec…
ENSDART00000019165	ENSDARG00000021239	4:17854737-18212788	4.37094	0.732846	-2.57636	-2.89375	0.00265	0.0102015	Down	apaf1	K02084	molecular_function:nucleotide binding(GO:0000166);molecular_function:ATP binding(GO:0005524);cellular_component:cytoplasm(GO:0005737);biological_process:proteolysis(GO:0006508);biological_process:apoptotic process(GO:0006915);molecular_function:peptidase activity(GO:0008233);biological_process:activation of cysteine-type endopeptidase activity involved in apoptotic process by cytochrome c(GO:0008…
ENSDART00000019294	ENSDARG00000015678	1:9300128-9305551	1.66908	0	-inf	-nan	5e-05	0.000273814	Down	si:dkeyp-75b4.9	_	molecular_function:GTP binding(GO:0005525)
ENSDART00000019353	ENSDARG00000032496	16:24731567-24741233	5.59609	2.02002	-1.47005	-9.77296	5e-05	0.000273814	Down	pon1	_	molecular_function:arylesterase activity(GO:0004064);molecular_function:arylesterase activity(GO:0004064);cellular_component:cellular_component(GO:0005575);biological_process:response to toxic substance(GO:0009636)
ENSDART00000019770	ENSDARG00000005739	1:28157820-28241594	4.98325	0.185096	-4.75074	-4.71242	0.0045	0.0163243	Down	gpm6ba	_	molecular_function:molecular_function(GO:0003674);biological_process:biological_process(GO:0008150);cellular_component:membrane(GO:0016020);cellular_component:integral component of membrane(GO:0016021)
ENSDART00000019949	ENSDARG00000011170	7:3794729-3900254	11.0395	22.6868	1.03917	19.4527	5e-05	0.000273814	Ups	ndrg2	_	cellular_component:cytoplasm(GO:0005737);cellular_component:cytoplasm(GO:0005737);biological_process:signal transduction(GO:0007165);biological_process:multicellular organismal development(GO:0007275);biological_process:nervous system development(GO:0007399);biological_process:Wnt signaling pathway(GO:0016055);biological_process:cell differentiation(GO:0030154)
ENSDART00000020048	ENSDARG00000011459	21:17535784-17566546	3.26479	1.25749	-1.37644	-2.56416	5e-05	0.000273814	Down	gsna	K05768	molecular_function:actin binding(GO:0003779);molecular_function:calcium ion binding(GO:0005509);biological_process:actin nucleation(GO:0045010);biological_process:actin filament severing(GO:0051014);biological_process:barbed-end actin filament capping(GO:0051016)
ENSDART00000020167	ENSDARG00000013926	17:20619233-20646780	0.793904	0.170573	-2.21858	-2.72411	0.0097	0.0316448	Down	slc16a9a	_	molecular_function:monocarboxylic acid transmembrane transporter activity(GO:0008028);cellular_component:membrane(GO:0016020);cellular_component:integral component of membrane(GO:0016021);cellular_component:integral component of membrane(GO:0016021);biological_process:transmembrane transport(GO:0055085)
ENSDART00000020204	ENSDARG00000018459	24:16897403-16903499	0.37644	3.49789	3.21599	6.55239	5e-05	0.000273814	Ups	msrb2	K07305	molecular_function:actin binding(GO:0003779);cellular_component:mitochondrion(GO:0005739);biological_process:response to oxidative stress(GO:0006979);molecular_function:peptide-methionine (S)-S-oxide reductase activity(GO:0008113);molecular_function:oxidoreductase activity(GO:0016491);molecular_function:oxidoreductase activity, acting on a sulfur group of donors, disulfide as acceptor(GO:0016671)…
ENSDART00000020212	ENSDARG00000008188	7:22538747-22549659	3.3259	1.40208	-1.24617	-3.15452	0.00015	0.000764619	Down	sf1	_	biological_process:mRNA splicing, via spliceosome(GO:0000398);molecular_function:nucleic acid binding(GO:0003676);molecular_function:RNA binding(GO:0003723);molecular_function:zinc ion binding(GO:0008270);molecular_function:pre-mRNA branch point binding(GO:0045131);biological_process:retina development in camera-type eye(GO:0060041)
ENSDART00000020637	ENSDARG00000012609	9:33029367-33046387	0.622954	0.095614	-2.70383	-2.75404	0.0035	0.0130631	Down	hpx	K18977	cellular_component:extracellular region(GO:0005576);biological_process:transport(GO:0006810);biological_process:cellular iron ion homeostasis(GO:0006879);molecular_function:heme transporter activity(GO:0015232);biological_process:heme transport(GO:0015886);molecular_function:metal ion binding(GO:0046872);biological_process:cellular response to estrogen stimulus(GO:0071391)
ENSDART00000020921	ENSDARG00000011463	15:46371876-46390768	0.322383	0.929016	1.52693	2.41378	0.00605	0.0210844	Ups	CABZ01044048.1	_	_
ENSDART00000021192	ENSDARG00000007383	18:46173085-46210563	5.3187	1.9116	-1.47629	-9.79011	5e-05	0.000273814	Down	kcnk6	K04917	molecular_function:potassium channel activity(GO:0005267);cellular_component:integral component of plasma membrane(GO:0005887);biological_process:transport(GO:0006810);biological_process:ion transport(GO:0006811);biological_process:potassium ion transport(GO:0006813);cellular_component:membrane(GO:0016020);cellular_component:integral component of membrane(GO:0016021);molecular_function:potassium …
ENSDART00000021260	ENSDARG00000014233	14:50052432-50075400	0.575248	1.39187	1.27477	1.86846	0.0116	0.0370132	Ups	sept8b	K16939	molecular_function:nucleotide binding(GO:0000166);molecular_function:GTP binding(GO:0005525)
ENSDART00000021346	ENSDARG00000015404	14:891504-898801	0.281489	1.45993	2.37476	2.84468	0.00775	0.0261223	Ups	arl3l2	K07944	molecular_function:nucleotide binding(GO:0000166);molecular_function:GTP binding(GO:0005525);cellular_component:intracellular(GO:0005622);biological_process:small GTPase mediated signal transduction(GO:0007264);biological_process:regulation of axon extension involved in axon guidance(GO:0048841);biological_process:regulation of axon extension involved in axon guidance(GO:0048841);biological_proce…
ENSDART00000021504	ENSDARG00000015803	1:7850586-7869187	1.71045	3.98737	1.22106	4.31192	5e-05	0.000273814	Ups	smcr8b	_	_
ENSDART00000021550	ENSDARG00000026519	20:16033444-16256836	2.57846	1.19968	-1.10386	-3.15976	0.0001	0.0005238	Down	ralgps2	_	molecular_function:guanyl-nucleotide exchange factor activity(GO:0005085);biological_process:small GTPase mediated signal transduction(GO:0007264);biological_process:regulation of Ral protein signal transduction(GO:0032485)
ENSDART00000021604	ENSDARG00000016044	8:52429013-52444976	12.0861	27.0588	1.16275	10.9098	5e-05	0.000273814	Ups	gins4	K10735	biological_process:double-strand break repair via break-induced replication(GO:0000727);cellular_component:GINS complex(GO:0000811);cellular_component:nucleus(GO:0005634);biological_process:DNA replication(GO:0006260);biological_process:DNA replication initiation(GO:0006270);cellular_component:replication fork protection complex(GO:0031298);molecular_function:3'-5' DNA helicase activity(GO:004313…
ENSDART00000022074	ENSDARG00000019260	9:49008552-49038903	2.82198	6.83063	1.27531	5.45661	5e-05	0.000273814	Ups	dhrs9	_	biological_process:heart looping(GO:0001947);molecular_function:retinol dehydrogenase activity(GO:0004745);biological_process:neural crest cell development(GO:0014032);molecular_function:oxidoreductase activity(GO:0016491);biological_process:exocrine pancreas development(GO:0031017);biological_process:pectoral fin morphogenesis(GO:0035138);biological_process:retinol metabolic process(GO:0042572);…
ENSDART00000022445	ENSDARG00000005749	22:31096348-31110475	5.65391	0.766181	-2.88349	-12.7554	5e-05	0.000273814	Down	cand2	K17263	cellular_component:nucleus(GO:0005634);biological_process:SCF complex assembly(GO:0010265);biological_process:protein ubiquitination(GO:0016567)
ENSDART00000022471	ENSDARG00000009870	12:2470785-2487770	6.23203	3.06612	-1.02329	-4.0998	5e-05	0.000273814	Down	mapk8b	_	molecular_function:nucleotide binding(GO:0000166);molecular_function:protein kinase activity(GO:0004672);molecular_function:protein serine/threonine kinase activity(GO:0004674);molecular_function:MAP kinase activity(GO:0004707);molecular_function:ATP binding(GO:0005524);biological_process:protein phosphorylation(GO:0006468);biological_process:JNK cascade(GO:0007254);biological_process:JNK cascade…
ENSDART00000023547	ENSDARG00000002632	12:48795596-48883985	20.7111	9.50354	-1.12387	-7.48949	5e-05	0.000273814	Down	anxa11b	K17095	molecular_function:calcium ion binding(GO:0005509);molecular_function:calcium-dependent phospholipid binding(GO:0005544)
ENSDART00000023793	ENSDARG00000013963	23:6701199-6727478	9.51558	21.2	1.1557	11.5126	5e-05	0.000273814	Ups	mipb	_	biological_process:lens development in camera-type eye(GO:0002088);molecular_function:transporter activity(GO:0005215);molecular_function:water transmembrane transporter activity(GO:0005372);cellular_component:integral component of plasma membrane(GO:0005887);biological_process:transport(GO:0006810);biological_process:cellular water homeostasis(GO:0009992);molecular_function:water channel activit…
ENSDART00000023796	ENSDARG00000079271	12:3008563-3019149	5.43769	11.559	1.08795	2.33416	0.0036	0.0133952	Ups	dcxr	K03331	cellular_component:cellular_component(GO:0005575);molecular_function:oxidoreductase activity(GO:0016491)
ENSDART00000023917	ENSDARG00000005126	4:73574646-73618127	1.54595	0.242495	-2.67247	-2.75844	0.00545	0.0192504	Down	large	K09668	molecular_function:alpha-1,6-mannosyltransferase activity(GO:0000009);molecular_function:alpha-1,2-mannosyltransferase activity(GO:0000026);molecular_function:mannosyltransferase activity(GO:0000030);molecular_function:alpha-1,3-mannosyltransferase activity(GO:0000033);cellular_component:Golgi membrane(GO:0000139);molecular_function:alpha-1,3-galactosyltransferase activity(GO:0001962);molecular_f…
ENSDART00000023963	ENSDARG00000032117	20:33272288-33286845	11.4555	24.6712	1.10679	2.45426	0.0022	0.00865771	Ups	ddx1	K13177	molecular_function:nucleic acid binding(GO:0003676);molecular_function:ATP-dependent RNA helicase activity(GO:0004004);molecular_function:ATP binding(GO:0005524);biological_process:RNA secondary structure unwinding(GO:0010501)
ENSDART00000024433	ENSDARG00000005518	8:15216858-15231227	3.57304	0.935638	-1.93313	-6.62807	5e-05	0.000273814	Down	slc5a9	K14389	molecular_function:transporter activity(GO:0005215);cellular_component:integral component of plasma membrane(GO:0005887);biological_process:transport(GO:0006810);biological_process:ion transport(GO:0006811);biological_process:sodium ion transport(GO:0006814);molecular_function:symporter activity(GO:0015293);cellular_component:membrane(GO:0016020);cellular_component:integral component of membrane(…
ENSDART00000024576	ENSDARG00000008447	18:6395927-6410013	13.1997	28.3509	1.10289	9.26401	5e-05	0.000273814	Ups	fkbp4	K09571	biological_process:protein peptidyl-prolyl isomerization(GO:0000413);molecular_function:peptidyl-prolyl cis-trans isomerase activity(GO:0003755);molecular_function:peptidyl-prolyl cis-trans isomerase activity(GO:0003755);molecular_function:FK506 binding(GO:0005528);molecular_function:FK506 binding(GO:0005528);cellular_component:endoplasmic reticulum membrane(GO:0005789);biological_process:protein…
ENSDART00000024629	ENSDARG00000020128	2:53185519-53210370	4.5087	2.21024	-1.02851	-7.14949	5e-05	0.000273814	Down	RAB31	K07891	_
ENSDART00000024726	ENSDARG00000015059	17:14459423-14551104	4.53285	1.84444	-1.29724	-3.29674	5e-05	0.000273814	Down	daam1a	K04512	molecular_function:actin binding(GO:0003779);biological_process:cellular component organization(GO:0016043);molecular_function:Rho GTPase binding(GO:0017048);biological_process:habenula development(GO:0021986);biological_process:habenula development(GO:0021986);biological_process:actin cytoskeleton organization(GO:0030036);biological_process:pronephros development(GO:0048793)
ENSDART00000024847	ENSDARG00000013935	19:2225701-2239151	3.13676	0.721256	-2.12069	-4.97642	5e-05	0.000273814	Down	TMEM196 (1 of many)	_	_
ENSDART00000024869	ENSDARG00000010586	7:34221266-34234569	2.00513	4.1594	1.05268	3.50703	5e-05	0.000273814	Ups	tex9	_	_
ENSDART00000025007	ENSDARG00000014246	13:33238011-34433123	1.51368	0.537362	-1.49409	-3.86803	5e-05	0.000273814	Down	JAG2 (1 of many)	_	_
ENSDART00000025019	ENSDARG00000013266	17:36569111-36581431	1.91587	0.879063	-1.12396	-3.97118	5e-05	0.000273814	Down	colec11	K10066	biological_process:neural crest cell migration(GO:0001755);biological_process:neural crest cell migration(GO:0001755);molecular_function:mannose binding(GO:0005537);cellular_component:extracellular region(GO:0005576);cellular_component:collagen trimer(GO:0005581);biological_process:multicellular organismal development(GO:0007275);molecular_function:carbohydrate binding(GO:0030246);biological_proc…
ENSDART00000025724	ENSDARG00000009313	3:24990607-25004561	8.30007	3.72164	-1.15718	-8.00451	5e-05	0.000273814	Down	NAPSA	K01379	molecular_function:aspartic-type endopeptidase activity(GO:0004190);molecular_function:aspartic-type endopeptidase activity(GO:0004190);cellular_component:extracellular space(GO:0005615);cellular_component:lysosome(GO:0005764);biological_process:proteolysis(GO:0006508);molecular_function:peptidase activity(GO:0008233);molecular_function:hydrolase activity(GO:0016787);biological_process:protein ca…
ENSDART00000025820	ENSDARG00000018944	22:34735346-34758156	4.18836	8.84868	1.07908	3.43709	5e-05	0.000273814	Ups	hoga1	K18123	molecular_function:catalytic activity(GO:0003824);cellular_component:mitochondrion(GO:0005739);biological_process:metabolic process(GO:0008152);molecular_function:4-hydroxy-2-oxoglutarate aldolase activity(GO:0008700);molecular_function:4-hydroxy-2-oxoglutarate aldolase activity(GO:0008700);biological_process:glyoxylate catabolic process(GO:0009436);molecular_function:lyase activity(GO:0016829)
ENSDART00000026430	ENSDARG00000002204	21:20347200-20348242	18.7682	3.68304	-2.34932	-10.63	5e-05	0.000273814	Down	hspb11	_	_
ENSDART00000026492	ENSDARG00000018820	4:10065902-10131044	26.0292	12.3941	-1.07048	-9.1716	5e-05	0.000273814	Down	flncb	K04437	molecular_function:actin binding(GO:0003779);cellular_component:cellular_component(GO:0005575);biological_process:locomotory behavior(GO:0007626);biological_process:muscle cell cellular homeostasis(GO:0046716);biological_process:muscle cell cellular homeostasis(GO:0046716);molecular_function:actin filament binding(GO:0051015)
ENSDART00000026794	ENSDARG00000006797	20:484031-544229	1.03629	2.46455	1.24989	5.75305	5e-05	0.000273814	Ups	nt5dc1	_	molecular_function:5'-nucleotidase activity(GO:0008253)
ENSDART00000026879	ENSDARG00000034063	17:53294819-53301747	3.99753	9.12286	1.19038	7.26479	5e-05	0.000273814	Ups	CABZ01068208.1	K20899	_
ENSDART00000027174	ENSDARG00000006169	25:35098167-35176589	1.95139	0.80506	-1.27733	-3.5747	5e-05	0.000273814	Down	lrrk2	K08844	molecular_function:protein kinase activity(GO:0004672);molecular_function:ATP binding(GO:0005524);molecular_function:GTP binding(GO:0005525);biological_process:protein phosphorylation(GO:0006468);biological_process:small GTPase mediated signal transduction(GO:0007264);molecular_function:kinase activity(GO:0016301);biological_process:phosphorylation(GO:0016310);molecular_function:transferase activ…
ENSDART00000027807	ENSDARG00000074498	7:36213120-36349817	2.36062	1.09021	-1.11456	-4.50074	5e-05	0.000273814	Down	chd9	K14438	molecular_function:ATP binding(GO:0005524);cellular_component:nucleus(GO:0005634);molecular_function:hydrolase activity, acting on acid anhydrides(GO:0016817)
ENSDART00000027982	ENSDARG00000005762	16:14794795-15160722	19.4223	9.60057	-1.01652	-15.0802	5e-05	0.000273814	Down	col14a1a	K08133	cellular_component:proteinaceous extracellular matrix(GO:0005578);cellular_component:collagen trimer(GO:0005581);cellular_component:basement membrane(GO:0005604);cellular_component:extracellular space(GO:0005615);biological_process:basement membrane assembly(GO:0070831)
ENSDART00000028297	ENSDARG00000089159	4:25617859-25714870	10.5793	3.94207	-1.42422	-2.83456	5e-05	0.000273814	Down	si:dkeyp-89c11.2	_	biological_process:acyl-CoA metabolic process(GO:0006637);molecular_function:thiolester hydrolase activity(GO:0016790)
ENSDART00000028592	ENSDARG00000025269	19:43277867-43305748	8.62285	2.40865	-1.83994	-6.85476	5e-05	0.000273814	Down	pdcd6ip	K12200	molecular_function:molecular_function(GO:0003674);cellular_component:cellular_component(GO:0005575)
ENSDART00000028607	ENSDARG00000017244	6:51575924-51666740	2.17055	0.555415	-1.96643	-7.06268	5e-05	0.000273814	Down	chd6	K14436	molecular_function:ATP binding(GO:0005524);cellular_component:nucleus(GO:0005634);molecular_function:hydrolase activity, acting on acid anhydrides(GO:0016817)
ENSDART00000028938	ENSDARG00000097017	18:10802448-10953520	2.21889	0.82813	-1.42191	-2.31304	0.01	0.032502	Down	mical3a	_	_
ENSDART00000029051	ENSDARG00000039832	13:699293-726410	8.34757	2.03059	-2.03946	-3.76011	5e-05	0.000273814	Down	gsta.2	K00799	molecular_function:glutathione transferase activity(GO:0004364);molecular_function:glutathione transferase activity(GO:0004364);cellular_component:cellular_component(GO:0005575);biological_process:metabolic process(GO:0008152);molecular_function:transferase activity(GO:0016740)
ENSDART00000029262	ENSDARG00000027196	3:32557992-32564878	1.05966	2.61194	1.30153	5.13334	5e-05	0.000273814	Ups	si:dkey-16l2.17	_	molecular_function:serine-type endopeptidase activity(GO:0004252);biological_process:proteolysis(GO:0006508);molecular_function:peptidase activity(GO:0008233);molecular_function:serine-type peptidase activity(GO:0008236);molecular_function:hydrolase activity(GO:0016787)
ENSDART00000029347	ENSDARG00000022303	2:1825740-1830943	11.4476	27.2732	1.25244	10.1752	5e-05	0.000273814	Ups	higd1a	_	cellular_component:membrane(GO:0016020);cellular_component:integral component of membrane(GO:0016021)
ENSDART00000029580	ENSDARG00000007975	25:2933070-2940214	2.66687	8.13412	1.60884	7.62372	5e-05	0.000273814	Ups	fth1b	_	molecular_function:iron ion binding(GO:0005506);cellular_component:cytoplasm(GO:0005737);biological_process:iron ion transport(GO:0006826);biological_process:cellular iron ion homeostasis(GO:0006879);biological_process:intracellular sequestering of iron ion(GO:0006880);molecular_function:ferric iron binding(GO:0008199);molecular_function:metal ion binding(GO:0046872)
ENSDART00000030738	ENSDARG00000025859	4:9477583-9501930	15.4312	39.2607	1.34723	19.8237	5e-05	0.000273814	Ups	lmf2b	_	molecular_function:molecular_function(GO:0003674);cellular_component:endoplasmic reticulum(GO:0005783);cellular_component:endoplasmic reticulum membrane(GO:0005789);cellular_component:membrane(GO:0016020);cellular_component:integral component of membrane(GO:0016021);biological_process:protein maturation(GO:0051604)
ENSDART00000030885	ENSDARG00000001686	8:22988422-23007297	0.321571	0.971556	1.59516	2.96993	0.0007	0.00311162	Ups	uckl1a	_	molecular_function:nucleotide binding(GO:0000166);molecular_function:uridine kinase activity(GO:0004849);molecular_function:uridine kinase activity(GO:0004849);molecular_function:ATP binding(GO:0005524);cellular_component:cytosol(GO:0005829);biological_process:pyrimidine nucleobase metabolic process(GO:0006206);biological_process:metabolic process(GO:0008152);biological_process:nucleoside metabol…
ENSDART00000030976	ENSDARG00000026736	10:13347490-13438601	1.99403	0.952851	-1.06536	-3.92782	5e-05	0.000273814	Down	il11ra	K05056	molecular_function:cytokine receptor activity(GO:0004896);cellular_component:membrane(GO:0016020);cellular_component:integral component of membrane(GO:0016021)
ENSDART00000031418	ENSDARG00000012381	15:37934330-37949384	1.50702	3.96747	1.39652	6.22418	5e-05	0.000273814	Ups	hsc70	K03283	molecular_function:nucleotide binding(GO:0000166);molecular_function:ATP binding(GO:0005524);cellular_component:cellular_component(GO:0005575)
ENSDART00000031759	ENSDARG00000005629	20:582189-600163	4.27647	12.9436	1.59775	5.72731	5e-05	0.000273814	Ups	smyd2b	K11426	biological_process:negative regulation of transcription from RNA polymerase II promoter(GO:0000122);molecular_function:RNA polymerase II core binding(GO:0000993);cellular_component:nucleus(GO:0005634);cellular_component:nucleus(GO:0005634);cellular_component:cytoplasm(GO:0005737);cellular_component:cytosol(GO:0005829);biological_process:transcription, DNA-templated(GO:0006351);biological_process:…
ENSDART00000032547	ENSDARG00000033227	14:36545209-36546749	1.69361	6.84052	2.014	4.66738	5e-05	0.000273814	Ups	lect2l	_	cellular_component:cytoplasm(GO:0005737);biological_process:response to bacterium(GO:0009617);biological_process:cilium organization(GO:0044782)
ENSDART00000033394	ENSDARG00000028000	24:3931993-3972265	1.21023	2.47863	1.03427	2.24308	0.0007	0.00311162	Ups	pfkpa	K00850	molecular_function:nucleotide binding(GO:0000166);molecular_function:catalytic activity(GO:0003824);molecular_function:6-phosphofructokinase activity(GO:0003872);molecular_function:ATP binding(GO:0005524);cellular_component:cytoplasm(GO:0005737);biological_process:fructose 6-phosphate metabolic process(GO:0006002);biological_process:glycolytic process(GO:0006096);biological_process:metabolic proc…
ENSDART00000033702	ENSDARG00000025679	11:25382275-25393826	8.89469	3.07941	-1.53029	-9.17005	5e-05	0.000273814	Down	comtb	K00545	molecular_function:magnesium ion binding(GO:0000287);cellular_component:cellular_component(GO:0005575);biological_process:catecholamine metabolic process(GO:0006584);molecular_function:methyltransferase activity(GO:0008168);molecular_function:O-methyltransferase activity(GO:0008171);molecular_function:catechol O-methyltransferase activity(GO:0016206);molecular_function:transferase activity(GO:001…
ENSDART00000033761	ENSDARG00000036415	1:51827329-51846081	1.61169	0.741757	-1.11955	-3.79819	5e-05	0.000273814	Down	glb1	K12309	molecular_function:hydrolase activity, hydrolyzing O-glycosyl compounds(GO:0004553);molecular_function:beta-galactosidase activity(GO:0004565);molecular_function:beta-galactosidase activity(GO:0004565);cellular_component:vacuole(GO:0005773);biological_process:carbohydrate metabolic process(GO:0005975);biological_process:metabolic process(GO:0008152);molecular_function:hydrolase activity(GO:001678…
ENSDART00000033844	ENSDARG00000021720	6:40186698-40314609	16.8869	8.2277	-1.03734	-15.2813	5e-05	0.000273814	Down	col7a1	K16628	molecular_function:serine-type endopeptidase inhibitor activity(GO:0004867);cellular_component:extracellular space(GO:0005615)
ENSDART00000033917	ENSDARG00000025034	1:7731871-7744650	1.72085	0.593763	-1.53516	-2.78056	0.00235	0.00917177	Down	syngr3b	_	molecular_function:molecular_function(GO:0003674);biological_process:biological_process(GO:0008150);cellular_component:membrane(GO:0016020);cellular_component:integral component of membrane(GO:0016021);cellular_component:synaptic vesicle membrane(GO:0030672);cellular_component:neuromuscular junction(GO:0031594)
ENSDART00000033976	ENSDARG00000077840	20:10111868-10133202	19.8788	9.54953	-1.05773	-2.71355	5e-05	0.000273814	Down	meis2b	_	biological_process:heart looping(GO:0001947);molecular_function:DNA binding(GO:0003677);cellular_component:nucleus(GO:0005634);biological_process:regulation of transcription, DNA-templated(GO:0006355);biological_process:heart development(GO:0007507)
ENSDART00000034011	ENSDARG00000016357	20:15184947-15205206	25.4609	11.4518	-1.1527	-12.1223	5e-05	0.000273814	Down	fmo5	K00485	molecular_function:monooxygenase activity(GO:0004497);molecular_function:N,N-dimethylaniline monooxygenase activity(GO:0004499);molecular_function:N,N-dimethylaniline monooxygenase activity(GO:0004499);cellular_component:endoplasmic reticulum(GO:0005783);cellular_component:endoplasmic reticulum membrane(GO:0005789);cellular_component:membrane(GO:0016020);molecular_function:oxidoreductase activity…
ENSDART00000034061	ENSDARG00000019651	21:40763744-40776357	1.34011	0	-inf	-nan	5e-05	0.000273814	Down	zgc:162239	_	molecular_function:nucleotide binding(GO:0000166);molecular_function:GTP binding(GO:0005525)
ENSDART00000034313	ENSDARG00000001259	25:34799954-34838562	1.48013	0.392173	-1.91616	-2.74119	0.00495	0.0176788	Down	GAS2 (1 of many)	_	_
ENSDART00000034683	ENSDARG00000026784	15:39431052-39755758	5.48712	2.72425	-1.01019	-5.05051	5e-05	0.000273814	Down	robo1	K06753	biological_process:endocardial progenitor cell migration to the midline involved in heart field formation(GO:0003262);biological_process:axon guidance(GO:0007411);biological_process:axon guidance(GO:0007411);biological_process:axon guidance(GO:0007411);biological_process:heart development(GO:0007507);cellular_component:membrane(GO:0016020);cellular_component:integral component of membrane(GO:0016…
ENSDART00000034883	ENSDARG00000022895	14:32102924-32163049	0.91695	0.372954	-1.29785	-4.18912	5e-05	0.000273814	Down	mcf2a	K20685	molecular_function:guanyl-nucleotide exchange factor activity(GO:0005085);molecular_function:Rho guanyl-nucleotide exchange factor activity(GO:0005089);biological_process:regulation of Rho protein signal transduction(GO:0035023);biological_process:intracellular signal transduction(GO:0035556)
ENSDART00000035096	ENSDARG00000019949	15:29450291-29454673	15.826	51.3296	1.6975	2.47366	0.0013	0.00542878	Ups	serpinh1b	K09501	molecular_function:serine-type endopeptidase inhibitor activity(GO:0004867);molecular_function:serine-type endopeptidase inhibitor activity(GO:0004867);molecular_function:collagen binding(GO:0005518);molecular_function:collagen binding(GO:0005518);cellular_component:extracellular space(GO:0005615);cellular_component:extracellular space(GO:0005615);cellular_component:endoplasmic reticulum(GO:00057…
ENSDART00000036318	ENSDARG00000026904	2:37892313-37895847	0.965597	5.73724	2.57086	5.23401	5e-05	0.000273814	Ups	cbln13	_	_
ENSDART00000036797	ENSDARG00000026871	1:21957016-21961685	2.58918	5.99711	1.21177	5.03245	5e-05	0.000273814	Ups	uchl1	K05611	molecular_function:ubiquitin-specific protease activity(GO:0004843);molecular_function:ubiquitin-specific protease activity(GO:0004843);cellular_component:intracellular(GO:0005622);cellular_component:cytoplasm(GO:0005737);biological_process:proteolysis(GO:0006508);biological_process:ubiquitin-dependent protein catabolic process(GO:0006511);molecular_function:peptidase activity(GO:0008233);molecul…
ENSDART00000036856	ENSDARG00000025046	4:76170095-76172043	0	0.666687	inf	-nan	5e-05	0.000273814	Ups	AL935186.1	_	_
ENSDART00000036891	ENSDARG00000004171	16:10937884-10946343	17.3494	7.30509	-1.24791	-9.16525	5e-05	0.000273814	Down	rabac1	K20359	biological_process:biological_process(GO:0008150);cellular_component:membrane(GO:0016020);cellular_component:integral component of membrane(GO:0016021)
ENSDART00000036979	ENSDARG00000005163	2:43023189-43090855	0.637823	0.197549	-1.69095	-2.3227	0.0092	0.0302397	Down	efr3a	_	cellular_component:cellular_component(GO:0005575)
ENSDART00000037007	ENSDARG00000025012	19:5177731-5186827	3.56556	7.32324	1.03835	4.68149	5e-05	0.000273814	Ups	tpi1a	K01803	molecular_function:catalytic activity(GO:0003824);molecular_function:triose-phosphate isomerase activity(GO:0004807);molecular_function:triose-phosphate isomerase activity(GO:0004807);cellular_component:cytosol(GO:0005829);biological_process:gluconeogenesis(GO:0006094);biological_process:gluconeogenesis(GO:0006094);biological_process:glycolytic process(GO:0006096);biological_process:glycolytic pr…
ENSDART00000037182	ENSDARG00000026028	9:32295581-32347740	1.98223	5.55656	1.48707	13.2631	5e-05	0.000273814	Ups	ankrd44	K15503	_
ENSDART00000037420	ENSDARG00000026519	20:16033444-16256836	2.07323	4.84164	1.22361	9.36998	5e-05	0.000273814	Ups	ralgps2	_	molecular_function:guanyl-nucleotide exchange factor activity(GO:0005085);biological_process:small GTPase mediated signal transduction(GO:0007264);biological_process:regulation of Ral protein signal transduction(GO:0032485)
ENSDART00000037797	ENSDARG00000028367	16:44324430-45035320	2.06356	4.18546	1.02025	2.16165	0.00515	0.0182949	Ups	sult2st3	K01015	molecular_function:N-acetylglucosamine 6-O-sulfotransferase activity(GO:0001517);molecular_function:N-acetylgalactosamine 4-O-sulfotransferase activity(GO:0001537);molecular_function:heparan sulfate 2-O-sulfotransferase activity(GO:0004394);molecular_function:sulfotransferase activity(GO:0008146);molecular_function:sulfotransferase activity(GO:0008146);molecular_function:HNK-1 sulfotransferase ac…
ENSDART00000037808	ENSDARG00000022689	2:43719682-43753656	6.44019	3.10089	-1.05442	-5.91888	5e-05	0.000273814	Down	itgb1b.2	K05719	molecular_function:receptor activity(GO:0004872);biological_process:cell adhesion(GO:0007155);biological_process:cell-matrix adhesion(GO:0007160);biological_process:integrin-mediated signaling pathway(GO:0007229);cellular_component:integrin complex(GO:0008305);cellular_component:membrane(GO:0016020);cellular_component:integral component of membrane(GO:0016021)
ENSDART00000038499	ENSDARG00000077872	15:21178232-21303684	5.48367	11.0769	1.01434	5.5808	5e-05	0.000273814	Ups	si:dkey-52d15.1	_	_
ENSDART00000038505	ENSDARG00000024006	6:13099597-13100687	2.72491	1.07808	-1.33775	-3.08882	5e-05	0.000273814	Down	rprmb	_	molecular_function:molecular_function(GO:0003674);cellular_component:cytoplasm(GO:0005737);biological_process:cell cycle arrest(GO:0007050);biological_process:regulation of mitotic cell cycle(GO:0007346);cellular_component:membrane(GO:0016020);cellular_component:integral component of membrane(GO:0016021)
ENSDART00000038524	ENSDARG00000022183	13:25249981-25258601	0.239965	0.940497	1.9706	2.46688	0.00875	0.0289548	Ups	gsto1	K00799	molecular_function:glutathione transferase activity(GO:0004364);molecular_function:glutathione transferase activity(GO:0004364);cellular_component:cytoplasm(GO:0005737);cellular_component:cytoplasm(GO:0005737);biological_process:glutathione metabolic process(GO:0006749);biological_process:metabolic process(GO:0008152)
ENSDART00000038657	ENSDARG00000023820	21:45802098-45813782	5.88297	2.91369	-1.0137	-5.65003	5e-05	0.000273814	Down	faxdc2	K07750	molecular_function:C-4 methylsterol oxidase activity(GO:0000254);molecular_function:iron ion binding(GO:0005506);cellular_component:endoplasmic reticulum membrane(GO:0005789);biological_process:fatty acid biosynthetic process(GO:0006633);cellular_component:membrane(GO:0016020);cellular_component:integral component of membrane(GO:0016021);biological_process:sterol biosynthetic process(GO:0016126);…
ENSDART00000039079	ENSDARG00000079537	2:43276699-43281581	0.579604	0.0723343	-3.00232	-3.009	0.0038	0.0140588	Down	ftr13	_	cellular_component:intracellular(GO:0005622);molecular_function:zinc ion binding(GO:0008270);molecular_function:metal ion binding(GO:0046872)
ENSDART00000039080	ENSDARG00000026350	8:23538943-23557421	0.957007	0.466929	-1.03533	-2.00795	0.009	0.0296521	Down	wasb	K05747	molecular_function:actin binding(GO:0003779);biological_process:actin filament organization(GO:0007015);biological_process:neutrophil chemotaxis(GO:0030593);biological_process:leukocyte chemotaxis(GO:0030595);biological_process:macrophage chemotaxis(GO:0048246);biological_process:regulation of neutrophil migration(GO:1902622);biological_process:positive regulation of Arp2/3 complex-mediated actin…
ENSDART00000039551	ENSDARG00000029764	10:43716433-43826987	2.84976	1.28013	-1.15456	-2.23776	0.0029	0.0110452	Down	mef2ca	_	molecular_function:transcription regulatory region sequence-specific DNA binding(GO:0000976);molecular_function:DNA binding(GO:0003677);cellular_component:nucleus(GO:0005634);biological_process:transcription, DNA-templated(GO:0006351);biological_process:transcription, DNA-templated(GO:0006351);biological_process:regulation of transcription, DNA-templated(GO:0006355);biological_process:heart devel…
ENSDART00000039571	ENSDARG00000053617	21:43901951-43957792	0.698093	1.547	1.14798	2.99829	0.00025	0.0012226	Ups	camk2a	K04515	molecular_function:nucleotide binding(GO:0000166);biological_process:heart jogging(GO:0003146);molecular_function:protein kinase activity(GO:0004672);molecular_function:protein serine/threonine kinase activity(GO:0004674);molecular_function:calmodulin-dependent protein kinase activity(GO:0004683);molecular_function:calmodulin-dependent protein kinase activity(GO:0004683);molecular_function:calmod…
ENSDART00000039597	ENSDARG00000030449	19:9054116-9061113	10.7329	5.21803	-1.04046	-10.2339	5e-05	0.000273814	Down	crabp2b	_	molecular_function:retinoic acid binding(GO:0001972);molecular_function:transporter activity(GO:0005215);cellular_component:nucleus(GO:0005634);cellular_component:cytoplasm(GO:0005737);biological_process:transport(GO:0006810);molecular_function:lipid binding(GO:0008289);biological_process:hindbrain morphogenesis(GO:0021575);biological_process:regulation of retinoic acid receptor signaling pathway…
ENSDART00000039877	ENSDARG00000032627	4:26064228-26092014	2.273	1.11017	-1.03382	-2.68746	0.0003	0.00143914	Down	SCYL2	K17541	molecular_function:protein kinase activity(GO:0004672);molecular_function:ATP binding(GO:0005524);biological_process:protein phosphorylation(GO:0006468)
ENSDART00000040229	ENSDARG00000056128	9:48535149-48570251	3.95282	1.8837	-1.06931	-2.02045	0.00615	0.0213742	Down	fastkd1	_	molecular_function:protein kinase activity(GO:0004672);cellular_component:cellular_component(GO:0005575)
ENSDART00000040443	ENSDARG00000032263	21:30685037-30706157	6.59224	3.07025	-1.10241	-6.24583	5e-05	0.000273814	Down	zgc:110224	K10803	biological_process:single strand break repair(GO:0000012);molecular_function:damaged DNA binding(GO:0003684);cellular_component:nucleus(GO:0005634);cellular_component:nucleus(GO:0005634);biological_process:base-excision repair(GO:0006284)
ENSDART00000040500	ENSDARG00000025299	18:11047290-11216501	2.54865	0.854793	-1.57609	-4.23927	5e-05	0.000273814	Down	tspan9a	K17350	cellular_component:integral component of plasma membrane(GO:0005887);biological_process:cell surface receptor signaling pathway(GO:0007166);cellular_component:membrane(GO:0016020);cellular_component:integral component of membrane(GO:0016021)
ENSDART00000040900	ENSDARG00000030881	3:31943091-31948202	4.20755	1.20185	-1.80772	-5.13906	5e-05	0.000273814	Down	baxb	_	biological_process:release of cytochrome c from mitochondria(GO:0001836);cellular_component:mitochondrial outer membrane(GO:0005741);biological_process:mitochondrial fusion(GO:0008053);biological_process:intrinsic apoptotic signaling pathway in response to DNA damage(GO:0008630);molecular_function:channel activity(GO:0015267);cellular_component:membrane(GO:0016020);cellular_component:integral com…
ENSDART00000041707	ENSDARG00000034453	15:28153817-28192348	2.49015	4.98163	1.00039	2.90325	0.0006	0.00270717	Ups	unc119a	_	_
ENSDART00000041800	ENSDARG00000023609	11:38449170-38609446	0.619807	0.0921147	-2.75032	-4.34642	5e-05	0.000273814	Down	epha8	K05109	molecular_function:nucleotide binding(GO:0000166);molecular_function:protein kinase activity(GO:0004672);molecular_function:protein tyrosine kinase activity(GO:0004713);molecular_function:ephrin receptor activity(GO:0005003);molecular_function:GPI-linked ephrin receptor activity(GO:0005004);molecular_function:ATP binding(GO:0005524);biological_process:protein phosphorylation(GO:0006468);biologica…
ENSDART00000042082	ENSDARG00000033840	15:40707913-41032535	0.986345	0.32901	-1.58396	-5.53789	5e-05	0.000273814	Down	fat3a	K16506	molecular_function:calcium ion binding(GO:0005509);cellular_component:plasma membrane(GO:0005886);biological_process:cell adhesion(GO:0007155);biological_process:homophilic cell adhesion via plasma membrane adhesion molecules(GO:0007156);cellular_component:membrane(GO:0016020);cellular_component:integral component of membrane(GO:0016021);biological_process:cartilage morphogenesis(GO:0060536)
ENSDART00000042512	ENSDARG00000015310	3:15182467-15202638	11.2267	37.6793	1.74684	3.32237	5e-05	0.000273814	Ups	pitpnbl	_	cellular_component:intracellular(GO:0005622);cellular_component:endoplasmic reticulum(GO:0005783);cellular_component:trans-Golgi network(GO:0005802);biological_process:transport(GO:0006810);molecular_function:phosphatidylcholine transporter activity(GO:0008525);molecular_function:phosphatidylinositol transporter activity(GO:0008526)
ENSDART00000042704	ENSDARG00000030053	20:52723476-53040695	55.9249	27.6438	-1.01653	-7.13491	5e-05	0.000273814	Down	eef1db	K15410	molecular_function:translation elongation factor activity(GO:0003746);cellular_component:eukaryotic translation elongation factor 1 complex(GO:0005853);biological_process:translation(GO:0006412);biological_process:translational elongation(GO:0006414)
ENSDART00000043452	ENSDARG00000030512	18:21942674-21961685	2.33284	0.711647	-1.71285	-4.31337	5e-05	0.000273814	Down	tsnaxip1	_	cellular_component:cellular_component(GO:0005575);biological_process:biological_process(GO:0008150)
ENSDART00000043462	ENSDARG00000018179	23:27909105-27930563	6.53995	0.578723	-3.49833	-8.03191	5e-05	0.000273814	Down	acvrl1	_	molecular_function:nucleotide binding(GO:0000166);biological_process:blood vessel development(GO:0001568);biological_process:vasculature development(GO:0001944);molecular_function:protein kinase activity(GO:0004672);molecular_function:protein serine/threonine kinase activity(GO:0004674);molecular_function:transmembrane receptor protein serine/threonine kinase activity(GO:0004675);molecular_functi…
ENSDART00000043946	ENSDARG00000032005	6:7264728-7270343	0.94173	2.10635	1.16136	3.05999	0.00015	0.000764619	Ups	ccdc65	_	biological_process:regulation of cilium movement(GO:0003352)
ENSDART00000044030	ENSDARG00000056133	1:18780090-18809441	1.45752	0.717623	-1.02222	-3.17866	5e-05	0.000273814	Down	kitb	K05091	molecular_function:nucleotide binding(GO:0000166);molecular_function:protein kinase activity(GO:0004672);molecular_function:protein tyrosine kinase activity(GO:0004713);molecular_function:transmembrane receptor protein tyrosine kinase activity(GO:0004714);molecular_function:receptor signaling protein tyrosine kinase activity(GO:0004716);molecular_function:ATP binding(GO:0005524);biological_proces…
ENSDART00000044080	ENSDARG00000032963	23:21518370-21520434	2.03185	9.51427	2.2273	4.46286	5e-05	0.000273814	Ups	her12	K06055	biological_process:somitogenesis(GO:0001756);molecular_function:DNA binding(GO:0003677);cellular_component:nucleus(GO:0005634);biological_process:transcription, DNA-templated(GO:0006351);biological_process:regulation of transcription, DNA-templated(GO:0006355);biological_process:Notch signaling pathway(GO:0007219);biological_process:brain development(GO:0007420);molecular_function:protein dimeriz…
ENSDART00000044125	ENSDARG00000030038	20:14562949-14567032	12.8436	26.4446	1.04192	4.8581	5e-05	0.000273814	Ups	grcc10	_	molecular_function:molecular_function(GO:0003674);cellular_component:cytoplasm(GO:0005737);biological_process:biological_process(GO:0008150)
ENSDART00000044126	ENSDARG00000020655	17:12770863-12772390	1.38617	0.327524	-2.08143	-3.05151	0.0029	0.0110452	Down	INSM2	_	_
ENSDART00000044238	ENSDARG00000031776	3:31967792-31969285	201.639	82.0319	-1.29752	-21.5388	5e-05	0.000273814	Down	zgc:92066	K00522	molecular_function:iron ion binding(GO:0005506);cellular_component:cytoplasm(GO:0005737);biological_process:iron ion transport(GO:0006826);biological_process:cellular iron ion homeostasis(GO:0006879);biological_process:intracellular sequestering of iron ion(GO:0006880);molecular_function:ferric iron binding(GO:0008199);molecular_function:metal ion binding(GO:0046872)
ENSDART00000044683	ENSDARG00000007421	22:12746099-12761755	12.5919	48.5408	1.9467	21.5161	5e-05	0.000273814	Ups	ftcd	K13990	molecular_function:catalytic activity(GO:0003824);molecular_function:folic acid binding(GO:0005542);cellular_component:Golgi apparatus(GO:0005794);biological_process:metabolic process(GO:0008152);molecular_function:transferase activity(GO:0016740);biological_process:cellular metabolic process(GO:0044237)
ENSDART00000045249	ENSDARG00000032126	20:29568926-29572057	1.04549	7.72145	2.88469	6.72705	5e-05	0.000273814	Ups	scg5	_	_
ENSDART00000045410	ENSDARG00000035018	5:29193904-29203140	50.529	106.806	1.07981	13.5973	5e-05	0.000273814	Ups	thy1	K06514	biological_process:angiogenesis(GO:0001525);molecular_function:GTPase activator activity(GO:0005096);molecular_function:integrin binding(GO:0005178);molecular_function:integrin binding(GO:0005178);biological_process:negative regulation of protein kinase activity(GO:0006469);biological_process:cytoskeleton organization(GO:0007010);biological_process:cell adhesion(GO:0007155);molecular_function:pro…
ENSDART00000045588	ENSDARG00000033802	9:38599195-38609345	0.292405	1.11071	1.92544	3.50134	0.0003	0.00143914	Ups	cyp27a7	_	molecular_function:monooxygenase activity(GO:0004497);molecular_function:iron ion binding(GO:0005506);molecular_function:oxidoreductase activity(GO:0016491);molecular_function:oxidoreductase activity, acting on paired donors, with incorporation or reduction of molecular oxygen(GO:0016705);molecular_function:heme binding(GO:0020037);molecular_function:metal ion binding(GO:0046872);biological_proce…
ENSDART00000045792	ENSDARG00000031809	16:53568810-53588692	3.99755	0.972121	-2.03991	-2.89649	0.002	0.00795471	Down	rbm24b	_	molecular_function:nucleotide binding(GO:0000166);biological_process:somitogenesis(GO:0001756);biological_process:heart looping(GO:0001947);biological_process:atrial cardiac muscle tissue development(GO:0003228);biological_process:ventricular cardiac muscle tissue development(GO:0003229);molecular_function:nucleic acid binding(GO:0003676);cellular_component:cellular_component(GO:0005575);biologic…
ENSDART00000046253	ENSDARG00000034173	4:25402042-25454181	2.65979	0.495534	-2.42426	-7.13968	5e-05	0.000273814	Down	prkcq	K18052	molecular_function:nucleotide binding(GO:0000166);molecular_function:protein kinase activity(GO:0004672);molecular_function:protein serine/threonine kinase activity(GO:0004674);molecular_function:protein serine/threonine kinase activity(GO:0004674);molecular_function:protein kinase C activity(GO:0004697);molecular_function:ATP binding(GO:0005524);cellular_component:intracellular(GO:0005622);biolo…
ENSDART00000046792	ENSDARG00000027016	13:7243360-7417020	4.17753	1.94145	-1.10551	-4.77556	5e-05	0.000273814	Down	gbf1	K18443	molecular_function:ARF guanyl-nucleotide exchange factor activity(GO:0005086);molecular_function:ARF guanyl-nucleotide exchange factor activity(GO:0005086);cellular_component:trans-Golgi network(GO:0005802);biological_process:vesicle-mediated transport(GO:0016192);biological_process:regulation of ARF protein signal transduction(GO:0032012)
ENSDART00000046871	ENSDARG00000004055	4:18218859-18292110	2.03715	0.388113	-2.392	-6.08571	5e-05	0.000273814	Down	uhrf1bp1l	_	_
ENSDART00000046995	ENSDARG00000034777	3:5355259-5367200	15.7232	7.83887	-1.00418	-2.06477	0.00235	0.00917177	Down	txn2	K03671	biological_process:sulfate assimilation(GO:0000103);cellular_component:cytoplasm(GO:0005737);biological_process:protein folding(GO:0006457);biological_process:glycerol ether metabolic process(GO:0006662);molecular_function:protein disulfide oxidoreductase activity(GO:0015035);molecular_function:protein disulfide oxidoreductase activity(GO:0015035);molecular_function:oxidoreductase activity, actin…
ENSDART00000047401	ENSDARG00000011573	9:49043038-49119634	2.17486	0.310893	-2.80643	-5.00449	5e-05	0.000273814	Down	abcb11a	K05664	molecular_function:nucleotide binding(GO:0000166);molecular_function:ATP binding(GO:0005524);biological_process:transport(GO:0006810);cellular_component:membrane(GO:0016020);cellular_component:integral component of membrane(GO:0016021);cellular_component:integral component of membrane(GO:0016021);molecular_function:ATPase activity(GO:0016887);molecular_function:ATPase activity, coupled to transme…
ENSDART00000047409	ENSDARG00000073732	16:16941264-17037673	2.68761	0.967019	-1.47471	-4.01293	5e-05	0.000273814	Down	myh14	_	molecular_function:nucleotide binding(GO:0000166);molecular_function:motor activity(GO:0003774);molecular_function:actin binding(GO:0003779);molecular_function:ATP binding(GO:0005524);cellular_component:myosin complex(GO:0016459)
ENSDART00000047920	ENSDARG00000011257	16:9716713-10162147	0.4048	3.60504	3.15474	4.68926	5e-05	0.000273814	Ups	enpp2	K01122	biological_process:vasculature development(GO:0001944);molecular_function:nucleic acid binding(GO:0003676);molecular_function:catalytic activity(GO:0003824);molecular_function:phosphodiesterase I activity(GO:0004528);molecular_function:nucleotide diphosphatase activity(GO:0004551);molecular_function:lysophospholipase activity(GO:0004622);molecular_function:lysophospholipase activity(GO:0004622);m…
ENSDART00000047954	ENSDARG00000058221	10:11079953-11135889	5.14553	10.7152	1.05826	9.41607	5e-05	0.000273814	Ups	ugcg	K00720	biological_process:glucosylceramide biosynthetic process(GO:0006679);biological_process:glycosphingolipid metabolic process(GO:0006687);molecular_function:ceramide glucosyltransferase activity(GO:0008120);cellular_component:membrane(GO:0016020);cellular_component:membrane(GO:0016020);cellular_component:integral component of membrane(GO:0016021);molecular_function:transferase activity(GO:0016740);…
ENSDART00000048073	ENSDARG00000058381	23:10211571-10230063	21.4212	43.8541	1.03367	18.5051	5e-05	0.000273814	Ups	zgc:171775	K04441	molecular_function:nucleotide binding(GO:0000166);molecular_function:protein kinase activity(GO:0004672);molecular_function:protein serine/threonine kinase activity(GO:0004674);molecular_function:MAP kinase activity(GO:0004707);molecular_function:ATP binding(GO:0005524);biological_process:protein phosphorylation(GO:0006468);molecular_function:kinase activity(GO:0016301);biological_process:phospho…
ENSDART00000048994	ENSDARG00000013615	8:33920776-34077023	2.1476	5.4725	1.34947	2.58544	0.00105	0.00448059	Ups	pbx3b	K15610	molecular_function:DNA binding(GO:0003677);molecular_function:sequence-specific DNA binding transcription factor activity(GO:0003700);cellular_component:nucleus(GO:0005634);biological_process:regulation of transcription, DNA-templated(GO:0006355);molecular_function:sequence-specific DNA binding(GO:0043565)
ENSDART00000049148	ENSDARG00000004171	16:10937884-10946343	7.74455	19.8614	1.35871	5.4923	5e-05	0.000273814	Ups	rabac1	_	biological_process:biological_process(GO:0008150);cellular_component:membrane(GO:0016020);cellular_component:integral component of membrane(GO:0016021)
ENSDART00000049236	ENSDARG00000044062	17:8439762-8570568	2.70112	1.02176	-1.4025	-3.6733	5e-05	0.000273814	Down	ctbp2a	_	biological_process:negative regulation of transcription from RNA polymerase II promoter(GO:0000122);molecular_function:transcription corepressor activity(GO:0003714);cellular_component:nucleus(GO:0005634);biological_process:synapse assembly(GO:0007416);biological_process:metabolic process(GO:0008152);biological_process:regulation of gliogenesis(GO:0014013);biological_process:regulation of gliogen…
ENSDART00000049420	ENSDARG00000010420	16:31553811-31559300	0.601138	0.116842	-2.36314	-2.26896	0.01595	0.0484625	Down	ndrg1b	_	cellular_component:cytoplasm(GO:0005737);biological_process:signal transduction(GO:0007165);biological_process:peripheral nervous system myelin maintenance(GO:0032287);biological_process:regulation of cell proliferation(GO:0042127);biological_process:mast cell activation(GO:0045576)
ENSDART00000050576	ENSDARG00000005159	3:56339737-56526849	0.705395	2.99419	2.08566	4.82345	5e-05	0.000273814	Ups	cyth3b	K18441	molecular_function:ARF guanyl-nucleotide exchange factor activity(GO:0005086);biological_process:regulation of ARF protein signal transduction(GO:0032012)
ENSDART00000050750	ENSDARG00000033367	19:33329251-33341366	3.86081	11.7905	1.61065	3.20224	5e-05	0.000273814	Ups	rrm2b	_	molecular_function:ribonucleoside-diphosphate reductase activity, thioredoxin disulfide as acceptor(GO:0004748);cellular_component:cytoplasm(GO:0005737);cellular_component:ribonucleoside-diphosphate reductase complex(GO:0005971);biological_process:cellular response to DNA damage stimulus(GO:0006974);biological_process:deoxyribonucleoside diphosphate metabolic process(GO:0009186);biological_proces…
ENSDART00000050753	ENSDARG00000032639	4:22937496-22950494	0.131347	3.56679	4.76317	5.55797	0.0018	0.00725429	Ups	cd36	K06259	biological_process:immune response(GO:0006955);biological_process:immune response(GO:0006955);biological_process:cell surface receptor signaling pathway(GO:0007166);cellular_component:membrane(GO:0016020);cellular_component:integral component of membrane(GO:0016021);biological_process:response to vitamin B3(GO:0033552);biological_process:response to prostaglandin(GO:0034694);biological_process:de…
ENSDART00000051233	ENSDARG00000035360	5:37705419-37784602	2.22378	0.915769	-1.27996	-2.39105	0.0037	0.0137271	Down	mink1	_	molecular_function:protein kinase activity(GO:0004672);molecular_function:receptor signaling protein serine/threonine kinase activity(GO:0004702);molecular_function:ATP binding(GO:0005524);cellular_component:cytoplasm(GO:0005737);biological_process:protein phosphorylation(GO:0006468)
ENSDART00000051336	ENSDARG00000035422	5:32314167-32319996	3.44763	0.353845	-3.28442	-6.61088	5e-05	0.000273814	Down	cyr61l1	_	biological_process:regulation of cell growth(GO:0001558);molecular_function:integrin binding(GO:0005178);molecular_function:insulin-like growth factor binding(GO:0005520);cellular_component:extracellular region(GO:0005576);cellular_component:proteinaceous extracellular matrix(GO:0005578);biological_process:cell adhesion(GO:0007155);biological_process:signal transduction(GO:0007165);biological_pro…
ENSDART00000051414	ENSDARG00000004851	5:29996323-30006650	0.425179	1.42728	1.74712	2.21351	0.00215	0.00848366	Ups	hinfp	_	molecular_function:nucleic acid binding(GO:0003676);molecular_function:metal ion binding(GO:0046872)
ENSDART00000051434	ENSDARG00000035506	5:28971649-28987285	0.843042	0.0641506	-3.71607	-3.71877	0.0141	0.0437117	Down	entpd2a.1	K01509	cellular_component:membrane(GO:0016020);cellular_component:integral component of membrane(GO:0016021);molecular_function:hydrolase activity(GO:0016787);biological_process:response to ethanol(GO:0045471);biological_process:response to copper ion(GO:0046688)
ENSDART00000051541	ENSDARG00000035555	5:23345846-23351647	2.02456	0.924555	-1.13078	-2.68235	0.00095	0.00410593	Down	gbgt1l3	_	cellular_component:Golgi apparatus(GO:0005794);biological_process:carbohydrate metabolic process(GO:0005975);biological_process:glycolipid biosynthetic process(GO:0009247);cellular_component:membrane(GO:0016020);cellular_component:integral component of membrane(GO:0016021);molecular_function:transferase activity(GO:0016740);molecular_function:transferase activity, transferring glycosyl groups(GO:…
ENSDART00000051552	ENSDARG00000035562	5:23675506-23682065	7.27742	15.803	1.1187	11.2894	5e-05	0.000273814	Ups	mpdu1a	_	molecular_function:molecular_function(GO:0003674);biological_process:dolichol-linked oligosaccharide biosynthetic process(GO:0006488);cellular_component:membrane(GO:0016020);cellular_component:integral component of membrane(GO:0016021)
ENSDART00000052439	ENSDARG00000003381	17:15301498-15403052	1.07031	5.74955	2.42542	10.6257	5e-05	0.000273814	Ups	si:ch211-266g18.6	K17598	molecular_function:calcium ion binding(GO:0005509);molecular_function:calcium-dependent phospholipid binding(GO:0005544);cellular_component:plasma membrane(GO:0005886);biological_process:intracellular protein transport(GO:0006886);biological_process:exocytosis(GO:0006887);biological_process:vesicle fusion(GO:0006906);molecular_function:Rab GTPase binding(GO:0017137);biological_process:regulation …
ENSDART00000052683	ENSDARG00000052207	1:55560377-55651273	0.953951	3.78385	1.98787	10.5145	5e-05	0.000273814	Ups	c3a.3	K03990	molecular_function:endopeptidase inhibitor activity(GO:0004866);cellular_component:extracellular region(GO:0005576);cellular_component:extracellular space(GO:0005615)
ENSDART00000053332	ENSDARG00000055574	13:48191476-48260813	5.79922	2.82048	-1.03992	-3.70473	5e-05	0.000273814	Down	FOXN2 (1 of many)	K09407	_
ENSDART00000053568	ENSDARG00000036895	9:52812378-52951072	12.3262	37.7929	1.61639	6.42413	5e-05	0.000273814	Ups	dap1b	_	biological_process:negative regulation of autophagy(GO:0010507);biological_process:cellular response to amino acid starvation(GO:0034198);molecular_function:death domain binding(GO:0070513);biological_process:apoptotic signaling pathway(GO:0097190)
ENSDART00000053681	ENSDARG00000036965	1:41066428-41116690	3.83753	1.52263	-1.33362	-3.01448	0.0004	0.00187349	Down	rnf24	_	biological_process:protein polyubiquitination(GO:0000209);molecular_function:zinc ion binding(GO:0008270);cellular_component:membrane(GO:0016020);cellular_component:integral component of membrane(GO:0016021);biological_process:protein ubiquitination involved in ubiquitin-dependent protein catabolic process(GO:0042787);biological_process:proteasome-mediated ubiquitin-dependent protein catabolic pr…
ENSDART00000054088	ENSDARG00000037192	14:28224194-28228605	3.12228	1.14125	-1.45198	-3.23667	0.0002	0.000995331	Down	zgc:113364	_	molecular_function:nucleic acid binding(GO:0003676);cellular_component:cellular_component(GO:0005575);biological_process:biological_process(GO:0008150)
ENSDART00000054340	ENSDARG00000037350	1:22578763-22583765	84.3541	26.9009	-1.6488	-2.21342	5e-05	0.000273814	Down	rpl9	K02940	biological_process:cytoplasmic translation(GO:0002181);molecular_function:RNA binding(GO:0003723);molecular_function:structural constituent of ribosome(GO:0003735);molecular_function:structural constituent of ribosome(GO:0003735);cellular_component:intracellular(GO:0005622);cellular_component:ribosome(GO:0005840);biological_process:translation(GO:0006412);molecular_function:rRNA binding(GO:001984…
ENSDART00000054611	ENSDARG00000037503	14:12085891-12180608	0.759137	0.291784	-1.37946	-2.0708	0.0061	0.0212216	Down	thoc2	K12879	cellular_component:THO complex part of transcription export complex(GO:0000445);molecular_function:mRNA binding(GO:0003729);biological_process:mRNA export from nucleus(GO:0006406)
ENSDART00000055068	ENSDARG00000032836	3:60961254-60985787	3.84786	8.44729	1.13443	3.41252	5e-05	0.000273814	Ups	pvalb5	_	molecular_function:calcium ion binding(GO:0005509);cellular_component:cellular_component(GO:0005575);molecular_function:metal ion binding(GO:0046872)
ENSDART00000055194	ENSDARG00000037870	3:40384248-40387946	0.332284	2.96239	3.15627	3.49163	0.0001	0.0005238	Ups	actb2	K05692	molecular_function:nucleotide binding(GO:0000166);molecular_function:ATP binding(GO:0005524);cellular_component:cytoplasm(GO:0005737);cellular_component:cytoskeleton(GO:0005856);cellular_component:cytoskeleton(GO:0005856);cellular_component:plasma membrane(GO:0005886);cellular_component:focal adhesion(GO:0005925);cellular_component:dense body(GO:0097433)
ENSDART00000055248	ENSDARG00000037906	3:33789001-33811811	2.4297	5.5133	1.18214	2.88409	0.0006	0.00270717	Ups	alkbh7	K10769	cellular_component:mitochondrial matrix(GO:0005759);biological_process:cellular response to DNA damage stimulus(GO:0006974);biological_process:regulation of mitochondrial membrane permeability involved in programmed necrotic cell death(GO:1902445)
ENSDART00000055299	ENSDARG00000037946	3:32210202-32214186	1.84137	4.03396	1.13142	3.92979	5e-05	0.000273814	Ups	prl	_	molecular_function:hormone activity(GO:0005179);cellular_component:extracellular region(GO:0005576);biological_process:multicellular organismal response to stress(GO:0033555);biological_process:negative regulation of apoptotic process(GO:0043066)
ENSDART00000055328	ENSDARG00000037963	21:8263308-8304813	2.9747	6.3889	1.10282	5.82018	5e-05	0.000273814	Ups	nek6	K20875	molecular_function:nucleotide binding(GO:0000166);cellular_component:proteasome complex(GO:0000502);molecular_function:protein kinase activity(GO:0004672);molecular_function:protein serine/threonine kinase activity(GO:0004674);molecular_function:ATP binding(GO:0005524);biological_process:protein phosphorylation(GO:0006468);molecular_function:kinase activity(GO:0016301);biological_process:phosphor…
ENSDART00000055465	ENSDARG00000038052	16:14004895-14015513	1.18403	0.22486	-2.3966	-2.46952	0.01235	0.0390538	Down	si:ch211-149k23.9	_	cellular_component:membrane(GO:0016020);cellular_component:integral component of membrane(GO:0016021)
ENSDART00000055779	ENSDARG00000038248	1:2299201-2305391	1.97349	16.9884	3.10573	16.0337	5e-05	0.000273814	Ups	ggact.2	K19761	molecular_function:gamma-glutamylcyclotransferase activity(GO:0003839);molecular_function:gamma-glutamylcyclotransferase activity(GO:0003839);cellular_component:cellular_component(GO:0005575);molecular_function:transferase activity(GO:0016740);molecular_function:transferase activity, transferring acyl groups(GO:0016746);biological_process:cellular modified amino acid catabolic process(GO:0042219)
ENSDART00000055817	ENSDARG00000038270	14:3610765-3837038	2.6922	1.2458	-1.11172	-5.87953	5e-05	0.000273814	Down	PIGG	K05310	molecular_function:catalytic activity(GO:0003824);biological_process:GPI anchor biosynthetic process(GO:0006506);biological_process:metabolic process(GO:0008152);cellular_component:membrane(GO:0016020);cellular_component:integral component of membrane(GO:0016021);cellular_component:integral component of endoplasmic reticulum membrane(GO:0030176);molecular_function:CP2 mannose-ethanolamine phospho…
ENSDART00000055843	ENSDARG00000038288	25:3684073-3704613	9.37627	4.17915	-1.16581	-6.12476	5e-05	0.000273814	Down	cd151	K06537	molecular_function:molecular_function(GO:0003674);cellular_component:integral component of plasma membrane(GO:0005887);biological_process:cell surface receptor signaling pathway(GO:0007166);cellular_component:membrane(GO:0016020);cellular_component:integral component of membrane(GO:0016021)
ENSDART00000055961	ENSDARG00000038360	14:6228698-6233919	4.73127	9.66752	1.03092	5.92404	5e-05	0.000273814	Ups	thg1l	K10761	molecular_function:nucleotide binding(GO:0000166);molecular_function:magnesium ion binding(GO:0000287);molecular_function:GTP binding(GO:0005525);biological_process:tRNA modification(GO:0006400);biological_process:tRNA processing(GO:0008033);biological_process:tRNA processing(GO:0008033);molecular_function:tRNA guanylyltransferase activity(GO:0008193);molecular_function:tRNA guanylyltransferase a…
ENSDART00000056035	ENSDARG00000038398	3:4123841-4135425	4.20413	1.89672	-1.1483	-2.73234	0.00045	0.00208841	Down	PMM1	K17497	_
ENSDART00000056291	ENSDARG00000038561	2:48220078-48228018	0.776164	1.71325	1.1423	2.236	0.0035	0.0130631	Ups	klf6b	K09207	molecular_function:nucleic acid binding(GO:0003676);molecular_function:metal ion binding(GO:0046872)
ENSDART00000056536	ENSDARG00000038713	2:37914609-37978360	4.14808	1.82674	-1.18317	-8.86156	5e-05	0.000273814	Down	tep1	K11127	molecular_function:RNA binding(GO:0003723);cellular_component:ribonucleoprotein complex(GO:0030529)
ENSDART00000056667	ENSDARG00000038802	2:34145519-34190271	0.902637	4.80985	2.41377	4.47644	5e-05	0.000273814	Ups	cenpl	K11504	cellular_component:chromosome, centromeric region(GO:0000775);cellular_component:nucleus(GO:0005634);cellular_component:chromosome(GO:0005694)
ENSDART00000056787	ENSDARG00000038898	2:26936333-26941160	1.02434	2.81231	1.45707	3.09281	0.0005	0.00229906	Ups	zgc:113691	_	molecular_function:molecular_function(GO:0003674);cellular_component:cellular_component(GO:0005575);biological_process:biological_process(GO:0008150)
ENSDART00000057101	ENSDARG00000039099	7:8127066-8135474	125.336	504.161	2.00809	56.0713	5e-05	0.000273814	Ups	aep1	_	molecular_function:mannose binding(GO:0005537);molecular_function:carbohydrate binding(GO:0030246);molecular_function:protein homodimerization activity(GO:0042803);cellular_component:pore complex(GO:0046930);molecular_function:disaccharide binding(GO:0048030);biological_process:protein homooligomerization(GO:0051260)
ENSDART00000057318	ENSDARG00000039232	18:49945734-49959998	4.1855	1.64074	-1.35106	-5.76633	5e-05	0.000273814	Down	DUSP8 (1 of many)	_	_
ENSDART00000057369	ENSDARG00000039264	6:18850264-18858473	0.497986	1.36074	1.45021	3.46904	0.0003	0.00143914	Ups	igfbp5a	_	biological_process:regulation of cell growth(GO:0001558);molecular_function:fibronectin binding(GO:0001968);molecular_function:insulin-like growth factor binding(GO:0005520);cellular_component:extracellular region(GO:0005576);cellular_component:extracellular space(GO:0005615);molecular_function:insulin-like growth factor I binding(GO:0031994);molecular_function:insulin-like growth factor II bindi…
ENSDART00000057422	ENSDARG00000032865	23:3712121-3760801	2.52432	0.999688	-1.33635	-2.19527	0.01275	0.0400872	Down	pacsin1a	K20123	cellular_component:endosome(GO:0005768);biological_process:actin filament organization(GO:0007015);biological_process:regulation of endocytosis(GO:0030100);biological_process:neuron development(GO:0048666);biological_process:neuron projection morphogenesis(GO:0048812);biological_process:membrane tubulation(GO:0097320)
ENSDART00000057599	ENSDARG00000039422	13:24453950-24457770	2.50398	5.93286	1.2445	3.39812	0.0001	0.0005238	Ups	fuom	K02431	biological_process:monosaccharide metabolic process(GO:0005996);biological_process:fucose metabolic process(GO:0006004);molecular_function:isomerase activity(GO:0016853);molecular_function:racemase and epimerase activity, acting on carbohydrates and derivatives(GO:0016857);molecular_function:fucose binding(GO:0042806);molecular_function:monosaccharide binding(GO:0048029)
ENSDART00000058336	ENSDARG00000039880	25:7478820-7546563	4.95291	22.8653	2.20681	4.38815	5e-05	0.000273814	Ups	arpp19b	_	molecular_function:protein phosphatase inhibitor activity(GO:0004864);cellular_component:cytoplasm(GO:0005737);biological_process:negative regulation of protein dephosphorylation(GO:0035308)
ENSDART00000058647	ENSDARG00000040100	18:8914253-8927773	1.71416	3.52415	1.03977	2.93305	0.0003	0.00143914	Ups	si:dkey-95h12.1	_	molecular_function:carbohydrate binding(GO:0030246)
ENSDART00000058829	ENSDARG00000040214	16:31228155-31230788	0.851196	2.15432	1.33967	3.81017	5e-05	0.000273814	Ups	scrt1b	K09219	molecular_function:nucleic acid binding(GO:0003676);molecular_function:metal ion binding(GO:0046872)
ENSDART00000058959	ENSDARG00000097789	16:24741925-24753588	10.5519	24.1422	1.19405	8.18734	5e-05	0.000273814	Ups	pon3.2	K01045	molecular_function:arylesterase activity(GO:0004064);molecular_function:arylesterase activity(GO:0004064);cellular_component:cellular_component(GO:0005575);biological_process:response to toxic substance(GO:0009636)
ENSDART00000059028	ENSDARG00000040338	10:8443228-8454264	15.0556	7.45972	-1.0131	-6.79664	5e-05	0.000273814	Down	hvcn1	_	molecular_function:voltage-gated ion channel activity(GO:0005244);cellular_component:plasma membrane(GO:0005886);cellular_component:integral component of plasma membrane(GO:0005887);biological_process:transport(GO:0006810);biological_process:ion transport(GO:0006811);cellular_component:membrane(GO:0016020);cellular_component:integral component of membrane(GO:0016021);molecular_function:voltage-ga…
ENSDART00000059179	ENSDARG00000040430	3:24352450-24371248	1.33642	0.55514	-1.26745	-2.6573	0.00125	0.00524587	Down	nptxra	_	molecular_function:molecular_function(GO:0003674);cellular_component:cellular_component(GO:0005575);biological_process:biological_process(GO:0008150)
ENSDART00000059321	ENSDARG00000040534	13:8508748-8511340	217.299	19.891	-3.44949	-43.5756	5e-05	0.000273814	Down	epcam	K06737	biological_process:liver development(GO:0001889);biological_process:liver development(GO:0001889);biological_process:morphogenesis of an epithelium(GO:0002009);cellular_component:plasma membrane(GO:0005886);cellular_component:integral component of plasma membrane(GO:0005887);cellular_component:membrane(GO:0016020);cellular_component:integral component of membrane(GO:0016021);cellular_component:ba…
ENSDART00000059473	ENSDARG00000093699	22:8465913-8473433	3.1274	1.13139	-1.46686	-5.13622	5e-05	0.000273814	Down	si:ch73-27e22.4	_	molecular_function:receptor binding(GO:0005102);biological_process:immune response(GO:0006955);cellular_component:cell surface(GO:0009986)
ENSDART00000059926	ENSDARG00000070604	16:14075802-14086815	0.411678	0.944811	1.19851	2.8069	0.00075	0.00330965	Ups	zgc:162509	_	molecular_function:molecular_function(GO:0003674);cellular_component:cellular_component(GO:0005575);biological_process:biological_process(GO:0008150)
ENSDART00000060169	ENSDARG00000041072	6:34842314-34855028	7.13847	3.29596	-1.11492	-3.32935	5e-05	0.000273814	Down	mier1a	_	molecular_function:DNA binding(GO:0003677);molecular_function:signal transducer activity(GO:0004871);cellular_component:nucleus(GO:0005634);biological_process:signal transduction(GO:0007165);cellular_component:transcriptional repressor complex(GO:0017053)
ENSDART00000060184	ENSDARG00000041078	18:21133751-21156308	2.44938	1.16737	-1.06916	-1.8833	0.0112	0.0359257	Down	chka	K14156	cellular_component:cellular_component(GO:0005575)
ENSDART00000060193	ENSDARG00000041080	23:30799184-30801065	1.48824	3.07359	1.04632	3.51986	5e-05	0.000273814	Ups	thap3	_	molecular_function:nucleic acid binding(GO:0003676);cellular_component:cellular_component(GO:0005575);biological_process:biological_process(GO:0008150)
ENSDART00000060594	ENSDARG00000041340	16:4570392-4811289	6.91984	17.1814	1.31203	4.35074	5e-05	0.000273814	Ups	mrpl51	K17432	molecular_function:structural constituent of ribosome(GO:0003735);molecular_function:structural constituent of ribosome(GO:0003735);molecular_function:structural constituent of ribosome(GO:0003735);cellular_component:mitochondrion(GO:0005739);cellular_component:mitochondrial large ribosomal subunit(GO:0005762);cellular_component:mitochondrial large ribosomal subunit(GO:0005762);cellular_component…
ENSDART00000060997	ENSDARG00000041616	18:17522928-17524485	1.79534	4.68188	1.38283	2.95219	0.0008	0.00350977	Ups	b3gnt9	K18705	molecular_function:alpha-1,6-mannosyltransferase activity(GO:0000009);molecular_function:alpha-1,2-mannosyltransferase activity(GO:0000026);molecular_function:mannosyltransferase activity(GO:0000030);molecular_function:alpha-1,3-mannosyltransferase activity(GO:0000033);cellular_component:Golgi membrane(GO:0000139);molecular_function:alpha-1,3-galactosyltransferase activity(GO:0001962);molecular_f…
ENSDART00000061037	ENSDARG00000041644	23:40979783-41002264	3.13321	1.45565	-1.10598	-4.1136	5e-05	0.000273814	Down	TMEM27	K20004	biological_process:proteolysis(GO:0006508);molecular_function:metallopeptidase activity(GO:0008237);molecular_function:peptidyl-dipeptidase activity(GO:0008241);cellular_component:membrane(GO:0016020);cellular_component:integral component of membrane(GO:0016021)
ENSDART00000061117	ENSDARG00000041703	22:25059296-25082243	59.6551	27.8254	-1.10024	-14.7978	5e-05	0.000273814	Down	rrbp1b	K14000	molecular_function:receptor activity(GO:0004872);cellular_component:ribosome(GO:0005840);biological_process:translation(GO:0006412);biological_process:protein transport(GO:0015031);cellular_component:membrane(GO:0016020);cellular_component:integral component of membrane(GO:0016021);cellular_component:integral component of endoplasmic reticulum membrane(GO:0030176);cellular_component:integral comp…
ENSDART00000061170	ENSDARG00000074118	2:43295519-43301940	2.44629	0.422558	-2.53338	-4.6052	5e-05	0.000273814	Down	ftr15	_	cellular_component:intracellular(GO:0005622);molecular_function:zinc ion binding(GO:0008270);molecular_function:metal ion binding(GO:0046872)
ENSDART00000061321	ENSDARG00000069926	9:21383575-21389595	0.623594	1.72131	1.46483	3.19	0.00015	0.000764619	Ups	hsd3b1	K00070	molecular_function:3-beta-hydroxy-delta5-steroid dehydrogenase activity(GO:0003854);molecular_function:3-beta-hydroxy-delta5-steroid dehydrogenase activity(GO:0003854);biological_process:steroid biosynthetic process(GO:0006694);molecular_function:oxidoreductase activity(GO:0016491);molecular_function:oxidoreductase activity, acting on the CH-OH group of donors, NAD or NADP as acceptor(GO:0016616)…
ENSDART00000062135	ENSDARG00000042379	15:16937667-16948890	3.77685	8.7011	1.20401	6.66878	5e-05	0.000273814	Ups	TMEM120A (1 of many)	_	cellular_component:membrane(GO:0016020);cellular_component:integral component of membrane(GO:0016021)
ENSDART00000062360	ENSDARG00000042530	18:12267317-12302162	9.05625	0.460157	-4.29871	-4.56341	5e-05	0.000273814	Down	nup205	K14310	biological_process:protein import into nucleus, docking(GO:0000059);cellular_component:nuclear pore(GO:0005643);biological_process:nuclear pore organization(GO:0006999);molecular_function:structural constituent of nuclear pore(GO:0017056);cellular_component:nuclear pore inner ring(GO:0044611)
ENSDART00000062556	ENSDARG00000042644	20:31028534-31044668	7.53938	15.4845	1.03831	5.32947	5e-05	0.000273814	Ups	sod2	K04564	biological_process:neutrophil homeostasis(GO:0001780);molecular_function:superoxide dismutase activity(GO:0004784);biological_process:superoxide metabolic process(GO:0006801);molecular_function:oxidoreductase activity(GO:0016491);biological_process:removal of superoxide radicals(GO:0019430);biological_process:innate immune response(GO:0045087);biological_process:response to cadmium ion(GO:0046686…
ENSDART00000062576	ENSDARG00000042659	15:19388955-19398716	10.1544	4.69185	-1.11387	-3.56695	5e-05	0.000273814	Down	thyn1	_	molecular_function:molecular_function(GO:0003674);cellular_component:nucleus(GO:0005634);cellular_component:nucleus(GO:0005634);biological_process:biological_process(GO:0008150)
ENSDART00000063151	ENSDARG00000006617	24:742694-986399	11.0477	1.11487	-3.3088	-8.47978	5e-05	0.000273814	Down	napga	_	molecular_function:soluble NSF attachment protein activity(GO:0005483);cellular_component:vacuolar membrane(GO:0005774);biological_process:intracellular protein transport(GO:0006886);biological_process:intracellular protein transport(GO:0006886);molecular_function:syntaxin binding(GO:0019905);cellular_component:SNARE complex(GO:0031201);biological_process:membrane fusion(GO:0061025)
ENSDART00000063438	ENSDARG00000053520	12:48552698-48563163	2.89601	0.495971	-2.54574	-6.42006	5e-05	0.000273814	Down	CABZ01079984.1	_	_
ENSDART00000063577	ENSDARG00000043309	8:18333464-18363075	0.696608	4.35714	2.64496	12.0935	5e-05	0.000273814	Ups	obscna	K17531	molecular_function:nucleotide binding(GO:0000166);molecular_function:protein kinase activity(GO:0004672);molecular_function:protein kinase activity(GO:0004672);molecular_function:Rho guanyl-nucleotide exchange factor activity(GO:0005089);molecular_function:ATP binding(GO:0005524);biological_process:protein phosphorylation(GO:0006468);biological_process:muscle organ development(GO:0007517);molecul…
ENSDART00000063644	ENSDARG00000043360	6:15000566-15004256	2.59569	6.79073	1.38745	3.02447	0.0004	0.00187349	Ups	dph3	K15455	molecular_function:molecular_function(GO:0003674)
ENSDART00000064061	ENSDARG00000076900	1:127249-596152	1.9526	9.37921	2.26407	2.74857	0.002	0.00795471	Ups	PROZ (1 of many)	_	molecular_function:serine-type endopeptidase activity(GO:0004252);molecular_function:calcium ion binding(GO:0005509);cellular_component:extracellular region(GO:0005576);biological_process:proteolysis(GO:0006508);biological_process:blood coagulation(GO:0007596)
ENSDART00000064107	ENSDARG00000043658	10:27134329-27196527	22.4844	6.71448	-1.74358	-6.81284	5e-05	0.000273814	Down	cxadr	K06788	molecular_function:virus receptor activity(GO:0001618);biological_process:kidney development(GO:0001822);cellular_component:plasma membrane(GO:0005886);cellular_component:plasma membrane(GO:0005886);cellular_component:adherens junction(GO:0005912);cellular_component:bicellular tight junction(GO:0005923);cellular_component:bicellular tight junction(GO:0005923);biological_process:cell adhesion(GO:0…
ENSDART00000064678	ENSDARG00000044059	17:8151003-8155745	1.724	0.847842	-1.02389	-2.28386	0.0027	0.0103597	Down	lft2	K04668	biological_process:heart field specification(GO:0003128);molecular_function:cytokine activity(GO:0005125);molecular_function:transforming growth factor beta receptor binding(GO:0005160);molecular_function:transforming growth factor beta receptor binding(GO:0005160);cellular_component:extracellular region(GO:0005576);cellular_component:extracellular space(GO:0005615);molecular_function:growth fact…
ENSDART00000064846	ENSDARG00000044169	23:45777629-45813729	5.13145	2.19741	-1.22356	-3.77798	5e-05	0.000273814	Down	prelid1b	_	cellular_component:mitochondrial intermembrane space(GO:0005758);molecular_function:phosphatidic acid transporter activity(GO:1990050)
ENSDART00000065006	ENSDARG00000094792	6:41455442-41504230	7.35618	3.57977	-1.03909	-5.97143	5e-05	0.000273814	Down	twf2a	K08870	_
ENSDART00000065135	ENSDARG00000044356	6:28805218-28923664	3.11744	0.790685	-1.97919	-2.54421	0.0002	0.000995331	Down	tp63	_	biological_process:negative regulation of transcription from RNA polymerase II promoter(GO:0000122);cellular_component:chromatin(GO:0000785);molecular_function:p53 binding(GO:0002039);molecular_function:DNA binding(GO:0003677);molecular_function:DNA binding(GO:0003677);molecular_function:chromatin binding(GO:0003682);molecular_function:damaged DNA binding(GO:0003684);molecular_function:double-str…
ENSDART00000065336	ENSDARG00000079272	24:36240789-36248321	9.7959	3.70277	-1.40357	-5.21091	5e-05	0.000273814	Down	tmem14cb	_	molecular_function:molecular_function(GO:0003674);biological_process:biological_process(GO:0008150);cellular_component:membrane(GO:0016020);cellular_component:integral component of membrane(GO:0016021)
ENSDART00000065362	ENSDARG00000044512	21:31238631-31253887	1.40264	0.602974	-1.21798	-3.54516	5e-05	0.000273814	Down	ca4c	K18246	molecular_function:carbonate dehydratase activity(GO:0004089);biological_process:one-carbon metabolic process(GO:0006730);molecular_function:zinc ion binding(GO:0008270);molecular_function:metal ion binding(GO:0046872)
ENSDART00000065467	ENSDARG00000002758	16:10950260-10972139	5.19037	1.36743	-1.92437	-3.62418	5e-05	0.000273814	Down	dedd1	_	biological_process:regulation of apoptotic process(GO:0042981)
ENSDART00000065470	ENSDARG00000044179	11:1874657-1923924	5.12153	1.50602	-1.76583	-4.10375	5e-05	0.000273814	Down	rbms2a	_	molecular_function:nucleotide binding(GO:0000166);molecular_function:nucleic acid binding(GO:0003676)
ENSDART00000065488	ENSDARG00000044584	7:8448598-8466190	12.0539	24.1779	1.00419	8.28082	5e-05	0.000273814	Ups	tex261	_	biological_process:ER to Golgi vesicle-mediated transport(GO:0006888);cellular_component:membrane(GO:0016020);cellular_component:integral component of membrane(GO:0016021);cellular_component:ER to Golgi transport vesicle(GO:0030134);cellular_component:integral component of Golgi membrane(GO:0030173);cellular_component:integral component of endoplasmic reticulum membrane(GO:0030176);molecular_func…
ENSDART00000065551	ENSDARG00000044615	6:6767467-6810419	3.08066	1.23696	-1.31644	-2.81946	0.00025	0.0012226	Down	zak	_	_
ENSDART00000065563	ENSDARG00000044626	21:22852283-22855519	10.0219	4.16084	-1.26821	-6.92409	5e-05	0.000273814	Down	ccdc90b	_	cellular_component:mitochondrion(GO:0005739);cellular_component:membrane(GO:0016020);cellular_component:integral component of membrane(GO:0016021)
ENSDART00000065821	ENSDARG00000090768	17:2393134-2419350	0.179732	0.935889	2.38049	2.4464	0.0089	0.0293712	Ups	zp3.2	_	biological_process:binding of sperm to zona pellucida(GO:0007339);cellular_component:extracellular matrix(GO:0031012);molecular_function:acrosin binding(GO:0032190);biological_process:egg coat formation(GO:0035803);biological_process:positive regulation of acrosome reaction(GO:2000344)
ENSDART00000066450	ENSDARG00000045200	7:6534619-6544930	2.52904	5.1083	1.01426	2.63391	0.0009	0.00391406	Ups	dusp19b	K14165	molecular_function:protein tyrosine phosphatase activity(GO:0004725);biological_process:protein dephosphorylation(GO:0006470);molecular_function:protein tyrosine/serine/threonine phosphatase activity(GO:0008138);biological_process:dephosphorylation(GO:0016311);molecular_function:phosphatase activity(GO:0016791)
ENSDART00000066583	ENSDARG00000004274	24:37596940-37800501	4.40382	10.4367	1.24484	3.36399	5e-05	0.000273814	Ups	zgc:112496	_	molecular_function:DNA binding(GO:0003677);molecular_function:catalytic activity(GO:0003824);biological_process:DNA repair(GO:0006281)
ENSDART00000066774	ENSDARG00000045408	15:557334-590378	0.666438	2.6153	1.97243	2.7427	0.0041	0.0150314	Ups	tagln	K20526	cellular_component:cellular_component(GO:0005575)
ENSDART00000066946	ENSDARG00000045525	4:25765526-25823131	12.5372	4.6347	-1.43567	-3.38785	5e-05	0.000273814	Down	tmcc3	_	cellular_component:membrane(GO:0016020);cellular_component:integral component of membrane(GO:0016021)
ENSDART00000067177	ENSDARG00000045694	4:13964649-13996917	4.72962	2.12962	-1.15113	-3.30796	5e-05	0.000273814	Down	prickle1b	_	biological_process:neuron migration(GO:0001764);biological_process:neuron migration(GO:0001764);molecular_function:zinc ion binding(GO:0008270);biological_process:facial nucleus development(GO:0021754);biological_process:hindbrain tangential cell migration(GO:0021934);molecular_function:metal ion binding(GO:0046872)
ENSDART00000067311	ENSDARG00000045790	4:9337902-9349669	0.641471	3.69267	2.52521	3.79276	0.00025	0.0012226	Ups	si:ch211-125a15.1	_	_
ENSDART00000067332	ENSDARG00000045808	25:18997279-19020176	1.48595	4.15823	1.48458	4.06996	5e-05	0.000273814	Ups	rlbp1b	K19625	molecular_function:transporter activity(GO:0005215);cellular_component:intracellular(GO:0005622);biological_process:transport(GO:0006810);biological_process:visual perception(GO:0007601);biological_process:optokinetic behavior(GO:0007634);biological_process:response to light stimulus(GO:0009416);molecular_function:retinal binding(GO:0016918)
ENSDART00000067374	ENSDARG00000045843	4:5325417-5655206	40.496	107.217	1.40469	6.40298	5e-05	0.000273814	Ups	apex1	K10771	biological_process:heart looping(GO:0001947);molecular_function:DNA binding(GO:0003677);molecular_function:RNA binding(GO:0003723);molecular_function:DNA-(apurinic or apyrimidinic site) lyase activity(GO:0003906);molecular_function:DNA-(apurinic or apyrimidinic site) lyase activity(GO:0003906);molecular_function:nuclease activity(GO:0004518);molecular_function:endonuclease activity(GO:0004519);ce…
ENSDART00000067662	ENSDARG00000046021	23:41784184-41797017	0	0.632495	inf	-nan	0.0029	0.0110452	Ups	CU914487.1	K20412	_
ENSDART00000067741	ENSDARG00000046079	16:12946022-12976431	4.71941	2.01816	-1.22556	-4.5781	5e-05	0.000273814	Down	cacng6b	K04871	molecular_function:voltage-gated calcium channel activity(GO:0005245);cellular_component:voltage-gated calcium channel complex(GO:0005891);cellular_component:membrane(GO:0016020);cellular_component:integral component of membrane(GO:0016021);biological_process:calcium ion transmembrane transport(GO:0070588)
ENSDART00000073399	ENSDARG00000051731	25:35735003-35760296	4.02132	0.984033	-2.03089	-3.30246	0.00055	0.00250382	Down	faap24	K10898	biological_process:DNA repair(GO:0006281);cellular_component:Fanconi anaemia nuclear complex(GO:0043240)
ENSDART00000073439	ENSDARG00000051761	25:36754494-36767489	6.10832	2.82405	-1.11301	-6.70026	5e-05	0.000273814	Down	trim44	K12020	cellular_component:intracellular(GO:0005622);molecular_function:zinc ion binding(GO:0008270);molecular_function:metal ion binding(GO:0046872)
ENSDART00000073442	ENSDARG00000074201	23:19827578-19882684	34.7978	17.3526	-1.00384	-15.6095	5e-05	0.000273814	Down	flna	K04437	molecular_function:actin binding(GO:0003779);molecular_function:actin filament binding(GO:0051015)
ENSDART00000073566	ENSDARG00000002347	25:22222391-22265705	1.03741	0.345598	-1.58582	-2.51835	0.0035	0.0130631	Down	cyp11a1	K00498	molecular_function:monooxygenase activity(GO:0004497);molecular_function:iron ion binding(GO:0005506);cellular_component:mitochondrion(GO:0005739);cellular_component:mitochondrion(GO:0005739);cellular_component:mitochondrial inner membrane(GO:0005743);biological_process:C21-steroid hormone biosynthetic process(GO:0006700);biological_process:C21-steroid hormone biosynthetic process(GO:0006700);bio…
ENSDART00000073663	ENSDARG00000039501	5:69083283-69104282	0.839032	2.62728	1.64677	3.55851	5e-05	0.000273814	Ups	ugt2a6	_	biological_process:metabolic process(GO:0008152);biological_process:flavonoid biosynthetic process(GO:0009813);molecular_function:glucuronosyltransferase activity(GO:0015020);molecular_function:glucuronosyltransferase activity(GO:0015020);cellular_component:membrane(GO:0016020);cellular_component:integral component of membrane(GO:0016021);molecular_function:transferase activity(GO:0016740);molecu…
ENSDART00000073839	ENSDARG00000012002	7:51520670-51539701	12.5799	4.24064	-1.56877	-7.31474	5e-05	0.000273814	Down	slc38a7	K14994	molecular_function:L-histidine transmembrane transporter activity(GO:0005290);molecular_function:L-glutamate transmembrane transporter activity(GO:0005313);biological_process:transport(GO:0006810);biological_process:ion transport(GO:0006811);biological_process:sodium ion transport(GO:0006814);biological_process:amino acid transport(GO:0006865);molecular_function:L-alanine transmembrane transporte…
ENSDART00000074061	ENSDARG00000056322	13:22346314-22422237	5.71413	2.25521	-1.34127	-3.57862	5e-05	0.000273814	Down	ldb3a	_	biological_process:somitogenesis(GO:0001756);biological_process:heart development(GO:0007507);biological_process:skeletal muscle tissue development(GO:0007519);biological_process:locomotory behavior(GO:0007626);molecular_function:zinc ion binding(GO:0008270);molecular_function:metal ion binding(GO:0046872)
ENSDART00000074272	ENSDARG00000052417	3:58165893-58170734	0.916232	2.32475	1.34329	2.87963	0.00075	0.00330965	Ups	NATD1 (1 of many)	_	molecular_function:molecular_function(GO:0003674);cellular_component:cellular_component(GO:0005575);biological_process:biological_process(GO:0008150)
ENSDART00000074534	ENSDARG00000052638	6:58921657-59361811	6.36137	1.33798	-2.24928	-3.94076	5e-05	0.000273814	Down	fam210b	_	molecular_function:molecular_function(GO:0003674);biological_process:biological_process(GO:0008150);cellular_component:membrane(GO:0016020);cellular_component:integral component of membrane(GO:0016021)
ENSDART00000074540	ENSDARG00000052644	12:21105912-21428583	0.625739	1.35043	1.10978	2.3455	0.00255	0.00985866	Ups	ca10a	_	cellular_component:cellular_component(GO:0005575);biological_process:swimming behavior(GO:0036269)
ENSDART00000074781	ENSDARG00000052851	5:40482380-40503491	0.224101	0.791634	1.82068	2.71147	0.00105	0.00448059	Ups	golph3	_	biological_process:Golgi vesicle transport(GO:0048193);molecular_function:phosphatidylinositol-4-phosphate binding(GO:0070273)
ENSDART00000075179	ENSDARG00000053186	12:2367350-2383755	3.9368	1.50052	-1.39156	-3.74192	5e-05	0.000273814	Down	vstm4b	_	cellular_component:plasma membrane(GO:0005886);cellular_component:membrane(GO:0016020);cellular_component:integral component of membrane(GO:0016021);cellular_component:integral component of membrane(GO:0016021)
ENSDART00000075659	ENSDARG00000053609	25:3675567-3682983	11.749	4.71085	-1.31848	-6.67104	5e-05	0.000273814	Down	pddc1	_	cellular_component:extracellular region(GO:0005576);molecular_function:glyoxalase III activity(GO:0019172);biological_process:methylglyoxal catabolic process to D-lactate(GO:0019243)
ENSDART00000075663	ENSDARG00000053636	25:3718922-3742331	1.99619	0.90696	-1.13814	-3.43302	5e-05	0.000273814	Down	cracr2b	K17199	molecular_function:calcium ion binding(GO:0005509);cellular_component:cellular_component(GO:0005575);biological_process:biological_process(GO:0008150);molecular_function:metal ion binding(GO:0046872)
ENSDART00000075808	ENSDARG00000053771	21:40707867-40759542	0.264597	0.900381	1.76674	2.62199	0.0043	0.0156761	Ups	APBB3	_	_
ENSDART00000075958	ENSDARG00000053853	21:39055230-39073444	1.20665	3.04205	1.33404	5.51959	5e-05	0.000273814	Ups	slc13a2	K14445	molecular_function:transporter activity(GO:0005215);cellular_component:integral component of plasma membrane(GO:0005887);biological_process:sodium ion transport(GO:0006814);molecular_function:low-affinity sodium:dicarboxylate symporter activity(GO:0015361);cellular_component:membrane(GO:0016020);cellular_component:integral component of membrane(GO:0016021);biological_process:transmembrane transpo…
ENSDART00000076160	ENSDARG00000054026	6:40764081-40902082	4.7415	0.603445	-2.97405	-2.65972	0.0098	0.0319226	Down	mustn1a	_	biological_process:chondrocyte differentiation(GO:0002062);cellular_component:nucleus(GO:0005634);cellular_component:nucleus(GO:0005634);biological_process:chondrocyte proliferation(GO:0035988);biological_process:tissue regeneration(GO:0042246);biological_process:cilium organization(GO:0044782)
ENSDART00000076340	ENSDARG00000054213	17:28653168-28684320	9.36646	4.61331	-1.0217	-3.45231	5e-05	0.000273814	Down	hectd1	_	molecular_function:ubiquitin-protein transferase activity(GO:0004842);cellular_component:nucleus(GO:0005634);cellular_component:cytoplasm(GO:0005737);biological_process:protein ubiquitination(GO:0016567);molecular_function:transferase activity(GO:0016740);molecular_function:ligase activity(GO:0016874);biological_process:protein ubiquitination involved in ubiquitin-dependent protein catabolic proc…
ENSDART00000076344	ENSDARG00000054213	17:28653168-28684320	5.56547	2.66881	-1.06031	-2.73735	5e-05	0.000273814	Down	hectd1	K12231	molecular_function:ubiquitin-protein transferase activity(GO:0004842);cellular_component:nucleus(GO:0005634);cellular_component:cytoplasm(GO:0005737);biological_process:protein ubiquitination(GO:0016567);molecular_function:transferase activity(GO:0016740);molecular_function:ligase activity(GO:0016874);biological_process:protein ubiquitination involved in ubiquitin-dependent protein catabolic proc…
ENSDART00000076345	ENSDARG00000054196	7:28892441-28904845	7.62197	3.27272	-1.21967	-5.20703	5e-05	0.000273814	Down	slc38a8b	K14994	_
ENSDART00000076925	ENSDARG00000054688	3:31109775-31111173	2.15794	0.968653	-1.15561	-2.94541	0.0004	0.00187349	Down	ITPRIPL2	_	_
ENSDART00000077119	ENSDARG00000054849	3:29783584-30022400	0.475914	1.94927	2.03416	3.51971	0.0002	0.000995331	Ups	bcat2	K00826	molecular_function:catalytic activity(GO:0003824);molecular_function:branched-chain-amino-acid transaminase activity(GO:0004084);molecular_function:branched-chain-amino-acid transaminase activity(GO:0004084);cellular_component:mitochondrion(GO:0005739);biological_process:aspartate biosynthetic process(GO:0006532);biological_process:metabolic process(GO:0008152);molecular_function:transaminase act…
ENSDART00000077151	ENSDARG00000029463	2:32281079-32372999	1.55494	0.448949	-1.79223	-3.50038	0.0001	0.0005238	Down	asap1a	K12488	molecular_function:GTPase activator activity(GO:0005096)
ENSDART00000077166	ENSDARG00000054890	13:29315775-29325409	1.90348	6.24127	1.7132	5.86881	5e-05	0.000273814	Ups	rgra	K04254	molecular_function:G-protein coupled receptor activity(GO:0004930);biological_process:G-protein coupled receptor signaling pathway(GO:0007186);biological_process:visual perception(GO:0007601);biological_process:phototransduction(GO:0007602);cellular_component:membrane(GO:0016020);cellular_component:integral component of membrane(GO:0016021)
ENSDART00000077180	ENSDARG00000054903	12:25132438-25193150	0.601982	1.64653	1.45164	2.23089	0.00765	0.0258352	Ups	mta3	K11660	molecular_function:DNA binding(GO:0003677);molecular_function:chromatin binding(GO:0003682);molecular_function:sequence-specific DNA binding transcription factor activity(GO:0003700);cellular_component:nucleus(GO:0005634);biological_process:regulation of transcription, DNA-templated(GO:0006355);molecular_function:zinc ion binding(GO:0008270);molecular_function:sequence-specific DNA binding(GO:004…
ENSDART00000077222	ENSDARG00000054941	16:30663536-30745696	2.47546	1.12766	-1.13437	-2.33725	0.00365	0.0135596	Down	ldlrad4b	_	cellular_component:membrane(GO:0016020);cellular_component:integral component of membrane(GO:0016021)
ENSDART00000077476	ENSDARG00000055158	17:32870008-32913277	0.514492	1.54827	1.58944	2.26997	0.0107	0.0345041	Ups	prox1a	K20211	molecular_function:RNA polymerase II core promoter proximal region sequence-specific DNA binding transcription factor activity involved in negative regulation of transcription(GO:0001078);biological_process:lymphangiogenesis(GO:0001946);biological_process:lymphangiogenesis(GO:0001946);molecular_function:DNA binding(GO:0003677);cellular_component:nucleus(GO:0005634);biological_process:forebrain ne…
ENSDART00000077538	ENSDARG00000038066	3:25239369-25246615	1.46	4.82061	1.72325	2.55409	0.0049	0.0175429	Ups	kpna2	_	cellular_component:nucleus(GO:0005634);cellular_component:nuclear pore(GO:0005643);cellular_component:nucleoplasm(GO:0005654);cellular_component:cytoplasm(GO:0005737);cellular_component:cytosol(GO:0005829);biological_process:protein import into nucleus(GO:0006606);biological_process:NLS-bearing protein import into nucleus(GO:0006607);biological_process:transport(GO:0006810);molecular_function:nuc…
ENSDART00000077600	ENSDARG00000074844	22:8309590-8360073	3.81381	1.05202	-1.85807	-11.8163	5e-05	0.000273814	Down	CABZ01061495.1	_	_
ENSDART00000077736	ENSDARG00000055388	15:28269293-28276050	13.7748	28.8726	1.06767	12.0108	5e-05	0.000273814	Ups	vtna	K06251	molecular_function:scavenger receptor activity(GO:0005044);cellular_component:cellular_component(GO:0005575);biological_process:immune response(GO:0006955);molecular_function:polysaccharide binding(GO:0030247)
ENSDART00000077767	ENSDARG00000055412	20:26924449-26971777	1.38263	0.413195	-1.74252	-3.59194	0.00025	0.0012226	Down	mylk4b	K00907	molecular_function:nucleotide binding(GO:0000166);molecular_function:protein kinase activity(GO:0004672);molecular_function:protein serine/threonine kinase activity(GO:0004674);molecular_function:ATP binding(GO:0005524);biological_process:protein phosphorylation(GO:0006468);cellular_component:membrane(GO:0016020);cellular_component:integral component of membrane(GO:0016021);molecular_function:kin…
ENSDART00000077980	ENSDARG00000055591	15:24214824-24243628	1.2286	3.13094	1.34958	4.774	5e-05	0.000273814	Ups	pipox	K00306	molecular_function:oxidoreductase activity(GO:0016491);biological_process:oxidation-reduction process(GO:0055114)
ENSDART00000078166	ENSDARG00000045159	12:18449580-18456558	1.12487	3.3344	1.56768	2.11028	0.0124	0.0391853	Ups	zdhhc4	_	molecular_function:zinc ion binding(GO:0008270);cellular_component:membrane(GO:0016020);cellular_component:integral component of membrane(GO:0016021);molecular_function:transferase activity(GO:0016740);molecular_function:transferase activity, transferring acyl groups(GO:0016746);molecular_function:protein-cysteine S-palmitoyltransferase activity(GO:0019706)
ENSDART00000078186	ENSDARG00000055786	14:30462150-30467860	5.16853	1.71549	-1.59113	-3.54993	5e-05	0.000273814	Down	prss23	K09627	biological_process:endocardium morphogenesis(GO:0003160);biological_process:atrioventricular valve development(GO:0003171);molecular_function:serine-type endopeptidase activity(GO:0004252);biological_process:proteolysis(GO:0006508);molecular_function:peptidase activity(GO:0008233);molecular_function:serine-type peptidase activity(GO:0008236);biological_process:regulation of Notch signaling pathwa…
ENSDART00000078325	ENSDARG00000045153	12:19069912-19076897	3.43942	0.748073	-2.20092	-3.93855	0.0002	0.000995331	Down	slc16a8	K08185	cellular_component:integral component of plasma membrane(GO:0005887);cellular_component:integral component of plasma membrane(GO:0005887);molecular_function:monocarboxylic acid transmembrane transporter activity(GO:0008028);molecular_function:lactate transmembrane transporter activity(GO:0015129);molecular_function:lactate transmembrane transporter activity(GO:0015129);biological_process:monocarb…
ENSDART00000078438	ENSDARG00000056045	12:18943609-18969340	0.43184	1.10018	1.34917	2.57844	0.00415	0.0151887	Ups	GUCY2C (1 of many)	_	molecular_function:nucleotide binding(GO:0000166);molecular_function:adenylate cyclase activity(GO:0004016);molecular_function:guanylate cyclase activity(GO:0004383);molecular_function:guanylate cyclase activity(GO:0004383);molecular_function:protein kinase activity(GO:0004672);molecular_function:ATP binding(GO:0005524);cellular_component:plasma membrane(GO:0005886);biological_process:cGMP biosyn…
ENSDART00000078610	ENSDARG00000056163	1:18118741-18123869	1.28508	0.597879	-1.10393	-2.13761	0.0088	0.0290893	Down	slc25a51a	_	biological_process:transport(GO:0006810);cellular_component:membrane(GO:0016020);cellular_component:integral component of membrane(GO:0016021)
ENSDART00000078703	ENSDARG00000056250	17:20228340-20376966	0.669266	1.7634	1.39771	4.08833	5e-05	0.000273814	Ups	add3b	K18622	_
ENSDART00000078707	ENSDARG00000056258	3:21905564-21924945	5.24231	0.962425	-2.44546	-3.86628	5e-05	0.000273814	Down	cdc27	K03350	cellular_component:cellular_component(GO:0005575);biological_process:cell cycle(GO:0007049);biological_process:cell division(GO:0051301)
ENSDART00000078723	ENSDARG00000025302	15:18194086-18219969	2.21471	6.26292	1.49972	1.95253	0.01535	0.04691	Ups	dixdc1a	_	cellular_component:cytoplasm(GO:0005737);cellular_component:cytosol(GO:0005829);cellular_component:focal adhesion(GO:0005925);biological_process:multicellular organismal development(GO:0007275);biological_process:Wnt signaling pathway(GO:0016055);cellular_component:cell junction(GO:0030054);biological_process:positive regulation of Wnt signaling pathway(GO:0030177);biological_process:forebrain de…
ENSDART00000078734	ENSDARG00000056314	15:21178232-21303684	34.9367	70.2403	1.00755	15.3975	5e-05	0.000273814	Ups	a2ml	K03910	biological_process:liver development(GO:0001889);molecular_function:endopeptidase inhibitor activity(GO:0004866);cellular_component:extracellular region(GO:0005576);cellular_component:extracellular space(GO:0005615)
ENSDART00000078888	ENSDARG00000056396	18:30532975-30586434	4.84453	10.5036	1.11645	6.04178	5e-05	0.000273814	Ups	dusp22a	K14165	molecular_function:phosphoprotein phosphatase activity(GO:0004721);molecular_function:protein tyrosine phosphatase activity(GO:0004725);cellular_component:nucleus(GO:0005634);cellular_component:cytoplasm(GO:0005737);biological_process:protein dephosphorylation(GO:0006470);biological_process:transforming growth factor beta receptor signaling pathway(GO:0007179);molecular_function:protein tyrosine/…
ENSDART00000078921	ENSDARG00000077252	22:5796400-5809877	4.91441	0.753037	-2.70623	-7.16094	5e-05	0.000273814	Down	si:rp71-36a1.5	_	_
ENSDART00000078996	ENSDARG00000056511	10:26838499-26849684	0.458928	2.1645	2.2377	4.85801	5e-05	0.000273814	Ups	arr3a	K04439	molecular_function:molecular_function(GO:0003674);cellular_component:cellular_component(GO:0005575);biological_process:signal transduction(GO:0007165);biological_process:visual perception(GO:0007601)
ENSDART00000079226	ENSDARG00000056691	14:23799327-23813594	2.17183	4.73546	1.1246	2.44677	0.0014	0.00578668	Ups	cpeb4	K02602	molecular_function:nucleotide binding(GO:0000166);molecular_function:translation repressor activity, nucleic acid binding(GO:0000900);biological_process:response to ischemia(GO:0002931);molecular_function:nucleic acid binding(GO:0003676);molecular_function:RNA binding(GO:0003723);molecular_function:mRNA 3'-UTR binding(GO:0003730);cellular_component:nucleus(GO:0005634);cellular_component:nucleus(G…
ENSDART00000079449	ENSDARG00000056873	10:22879103-22885306	6.89851	20.6059	1.5787	10.2298	5e-05	0.000273814	Ups	and3	_	_
ENSDART00000079469	ENSDARG00000056913	10:22819880-22834379	0.20941	2.89028	3.78681	3.056	0.00155	0.00634657	Ups	pcolcea	_	cellular_component:extracellular region(GO:0005576)
ENSDART00000080029	ENSDARG00000017023	17:18858081-18869123	0.538549	1.21996	1.17969	3.10695	0.0002	0.000995331	Ups	ak7b	K00939	molecular_function:ATP binding(GO:0005524);cellular_component:cellular_component(GO:0005575);biological_process:nucleobase-containing compound metabolic process(GO:0006139);molecular_function:kinase activity(GO:0016301);biological_process:phosphorylation(GO:0016310);molecular_function:transferase activity(GO:0016740);molecular_function:nucleobase-containing compound kinase activity(GO:0019205)
ENSDART00000080099	ENSDARG00000057426	23:19286843-19299366	0.673879	1.55568	1.20698	2.44091	0.00245	0.00950758	Ups	oard1	_	molecular_function:molecular_function(GO:0003674);cellular_component:cellular_component(GO:0005575);biological_process:biological_process(GO:0008150)
ENSDART00000080306	ENSDARG00000057598	22:13822358-13826520	1.42847	3.21662	1.17107	3.33931	0.00015	0.000764619	Ups	s100b	_	molecular_function:calcium ion binding(GO:0005509);molecular_function:zinc ion binding(GO:0008270);molecular_function:metal ion binding(GO:0046872)
ENSDART00000080414	ENSDARG00000057687	16:12820783-12833618	0.236339	0.686453	1.5383	2.27881	0.01185	0.0376946	Ups	sbk3	_	molecular_function:nucleotide binding(GO:0000166);molecular_function:protein kinase activity(GO:0004672);molecular_function:protein serine/threonine kinase activity(GO:0004674);molecular_function:receptor signaling protein serine/threonine kinase activity(GO:0004702);molecular_function:ATP binding(GO:0005524);cellular_component:cytoplasm(GO:0005737);biological_process:protein phosphorylation(GO:0…
ENSDART00000080545	ENSDARG00000057830	23:17034925-17078731	0.383473	1.67143	2.12389	3.35003	5e-05	0.000273814	Ups	dnmt3bb.2	K17399	biological_process:DNA methylation(GO:0006306);molecular_function:methyltransferase activity(GO:0008168);biological_process:retina layer formation(GO:0010842);molecular_function:transferase activity(GO:0016740);biological_process:neurogenesis(GO:0022008);biological_process:neurogenesis(GO:0022008);biological_process:exocrine pancreas development(GO:0031017);biological_process:methylation(GO:00322…
ENSDART00000080661	ENSDARG00000057903	17:15441467-15490342	5.863	2.39416	-1.29212	-2.15079	0.0024	0.0093369	Down	si:ch211-266g18.10	_	cellular_component:plasma membrane(GO:0005886);biological_process:muscle contraction(GO:0006936);biological_process:regulation of cell communication by electrical coupling(GO:0010649);biological_process:regulation of release of sequestered calcium ion into cytosol by sarcoplasmic reticulum(GO:0010880);cellular_component:junctional sarcoplasmic reticulum membrane(GO:0014701);cellular_component:mem…
ENSDART00000080709	ENSDARG00000068763	18:13280443-13326826	0.594214	0.121496	-2.29007	-3.1733	0.00135	0.00560823	Down	plcg2	K05859	molecular_function:phosphatidylinositol phospholipase C activity(GO:0004435);molecular_function:signal transducer activity(GO:0004871);biological_process:lipid metabolic process(GO:0006629);biological_process:signal transduction(GO:0007165);molecular_function:phosphoric diester hydrolase activity(GO:0008081);biological_process:phospholipid catabolic process(GO:0009395);biological_process:lipid ca…
ENSDART00000080975	ENSDARG00000058160	13:7109820-7121500	8.10136	4.05054	-1.00005	-6.62581	5e-05	0.000273814	Down	tnfaip2b	K19989	cellular_component:exocyst(GO:0000145);cellular_component:exocyst(GO:0000145);molecular_function:SNARE binding(GO:0000149);biological_process:exocytosis(GO:0006887);biological_process:exocytosis(GO:0006887);biological_process:exocyst localization(GO:0051601)
ENSDART00000081288	ENSDARG00000086425	16:9541720-9562689	1.65484	7.01213	2.08316	2.74376	0.0001	0.0005238	Ups	prpf3	K12843	biological_process:mRNA splicing, via spliceosome(GO:0000398);biological_process:mRNA splicing, via spliceosome(GO:0000398);biological_process:mRNA processing(GO:0006397);cellular_component:U4/U6 x U5 tri-snRNP complex(GO:0046540);cellular_component:U4/U6 x U5 tri-snRNP complex(GO:0046540);biological_process:retina development in camera-type eye(GO:0060041)
ENSDART00000081418	ENSDARG00000058548	16:7745314-7762634	8.08539	2.1522	-1.90951	-3.2729	5e-05	0.000273814	Down	bves	_	molecular_function:nucleotide binding(GO:0000166);biological_process:positive regulation of receptor recycling(GO:0001921);biological_process:response to ischemia(GO:0002931);molecular_function:structural molecule activity(GO:0005198);cellular_component:plasma membrane(GO:0005886);cellular_component:caveola(GO:0005901);cellular_component:bicellular tight junction(GO:0005923);cellular_component:bi…
ENSDART00000081433	ENSDARG00000058560	23:9626020-9632336	16.3115	46.4771	1.51063	9.93516	5e-05	0.000273814	Ups	adrm1	_	cellular_component:proteasome complex(GO:0000502);cellular_component:proteasome complex(GO:0000502);cellular_component:nucleus(GO:0005634);cellular_component:cytoplasm(GO:0005737);biological_process:proteasome assembly(GO:0043248);molecular_function:endopeptidase activator activity(GO:0061133)
ENSDART00000081463	ENSDARG00000006220	9:9998613-10032338	1.48616	3.07661	1.04975	2.95818	5e-05	0.000273814	Ups	ugt1ab	_	biological_process:metabolic process(GO:0008152);molecular_function:glucuronosyltransferase activity(GO:0015020);molecular_function:glucuronosyltransferase activity(GO:0015020);cellular_component:membrane(GO:0016020);cellular_component:integral component of membrane(GO:0016021);molecular_function:transferase activity(GO:0016740);molecular_function:transferase activity, transferring glycosyl group…
ENSDART00000081657	ENSDARG00000058731	8:12816820-12829697	1.07001	0.251127	-2.09113	-4.46384	5e-05	0.000273814	Down	slc2a6	K08144	molecular_function:transporter activity(GO:0005215);molecular_function:sugar:proton symporter activity(GO:0005351);cellular_component:integral component of plasma membrane(GO:0005887);biological_process:transport(GO:0006810);cellular_component:membrane(GO:0016020);cellular_component:integral component of membrane(GO:0016021);molecular_function:transmembrane transporter activity(GO:0022857);molecu…
ENSDART00000081760	ENSDARG00000058815	6:6902829-6924939	2.12413	0.996988	-1.09122	-2.9243	0.00055	0.00250382	Down	ihhb	K11989	cellular_component:extracellular region(GO:0005576);cellular_component:extracellular space(GO:0005615);cellular_component:plasma membrane(GO:0005886);biological_process:proteolysis(GO:0006508);biological_process:cell-cell signaling(GO:0007267);biological_process:multicellular organismal development(GO:0007275);molecular_function:peptidase activity(GO:0008233);cellular_component:membrane(GO:001602…
ENSDART00000081765	ENSDARG00000058824	11:11319836-11347525	4.8453	14.0208	1.53291	3.14383	5e-05	0.000273814	Ups	mrpl4	K02926	molecular_function:RNA binding(GO:0003723);molecular_function:structural constituent of ribosome(GO:0003735);molecular_function:structural constituent of ribosome(GO:0003735);cellular_component:mitochondrion(GO:0005739);cellular_component:ribosome(GO:0005840);biological_process:translation(GO:0006412);biological_process:translation(GO:0006412);cellular_component:cytosolic ribosome(GO:0022626);cel…
ENSDART00000081779	ENSDARG00000058830	19:1356989-1366871	4.31558	1.18284	-1.8673	-9.63933	5e-05	0.000273814	Down	zdhhc3b	K20029	molecular_function:zinc ion binding(GO:0008270);cellular_component:membrane(GO:0016020);cellular_component:integral component of membrane(GO:0016021);molecular_function:transferase activity(GO:0016740);molecular_function:transferase activity, transferring acyl groups(GO:0016746);molecular_function:protein-cysteine S-palmitoyltransferase activity(GO:0019706)
ENSDART00000081781	ENSDARG00000058835	20:3132646-3183121	0.54924	1.22489	1.15714	2.93145	0.0002	0.000995331	Ups	PLEKHG3	_	_
ENSDART00000081791	ENSDARG00000091624	5:8872335-8933732	0.344748	1.90041	2.4627	4.81436	5e-05	0.000273814	Ups	si:ch73-240m12.1	K00699	biological_process:metabolic process(GO:0008152);biological_process:flavonoid biosynthetic process(GO:0009813);molecular_function:glucuronosyltransferase activity(GO:0015020);molecular_function:glucuronosyltransferase activity(GO:0015020);cellular_component:membrane(GO:0016020);cellular_component:integral component of membrane(GO:0016021);molecular_function:transferase activity(GO:0016740);molecu…
ENSDART00000081852	ENSDARG00000021855	16:4570392-4811289	0.920975	0.251879	-1.87043	-2.28492	0.0059	0.020626	Down	arnt	_	molecular_function:DNA binding(GO:0003677);molecular_function:sequence-specific DNA binding transcription factor activity(GO:0003700);cellular_component:nucleus(GO:0005634);cellular_component:transcription factor complex(GO:0005667);cellular_component:cytoplasm(GO:0005737);biological_process:transcription, DNA-templated(GO:0006351);biological_process:regulation of transcription, DNA-templated(GO:…
ENSDART00000081894	ENSDARG00000058958	3:5439468-5452038	0.170761	1.21829	2.83481	3.29273	0.00255	0.00985866	Ups	si:ch73-106l15.3	_	_
ENSDART00000081909	ENSDARG00000058940	8:11505146-11512568	1.37653	4.62805	1.74937	2.95989	0.0015	0.00615809	Ups	si:ch211-248e11.2	_	_
ENSDART00000082085	ENSDARG00000059073	17:19323178-19325685	0.48067	1.48016	1.62263	2.83612	0.0029	0.0110452	Ups	gsc	K09324	molecular_function:DNA binding(GO:0003677);cellular_component:nucleus(GO:0005634);biological_process:regulation of transcription, DNA-templated(GO:0006355);biological_process:multicellular organismal development(GO:0007275);biological_process:brain development(GO:0007420);biological_process:anterior/posterior axis specification(GO:0009948);biological_process:dorsal/ventral axis specification(GO:0…
ENSDART00000082093	ENSDARG00000059079	12:3677310-3685192	4.86411	10.2092	1.06963	3.52594	5e-05	0.000273814	Ups	vps25	K12189	cellular_component:ESCRT II complex(GO:0000814);molecular_function:structural molecule activity(GO:0005198);cellular_component:cytoplasm(GO:0005737);biological_process:transport(GO:0006810);biological_process:protein transport(GO:0015031);molecular_function:protein homodimerization activity(GO:0042803);biological_process:protein targeting to vacuole involved in ubiquitin-dependent protein catabol…
ENSDART00000082127	ENSDARG00000059116	13:317541-349702	1.03237	0.343981	-1.58556	-3.43157	0.0001	0.0005238	Down	heatr5b	_	_
ENSDART00000082153	ENSDARG00000042282	9:3458132-3514959	2.38366	1.08468	-1.13591	-2.44113	0.0036	0.0133952	Down	itga6a	K06485	biological_process:cell adhesion(GO:0007155);biological_process:integrin-mediated signaling pathway(GO:0007229);biological_process:skeletal muscle tissue development(GO:0007519);biological_process:skeletal muscle tissue development(GO:0007519);cellular_component:integrin complex(GO:0008305);cellular_component:membrane(GO:0016020);cellular_component:integral component of membrane(GO:0016021)
ENSDART00000082315	ENSDARG00000059244	15:32391082-32409327	2.6621	0.917544	-1.53672	-2.52408	0.00275	0.0105371	Down	arfip2a	K20314	cellular_component:cytoplasm(GO:0005737);molecular_function:protein domain specific binding(GO:0019904);biological_process:ruffle organization(GO:0031529);biological_process:regulation of Arp2/3 complex-mediated actin nucleation(GO:0034315)
ENSDART00000082351	ENSDARG00000059279	24:8581298-8592141	2.65845	6.26422	1.23655	3.85812	5e-05	0.000273814	Ups	tfap2a	K09176	molecular_function:RNA polymerase II regulatory region sequence-specific DNA binding(GO:0000977);molecular_function:sequence-specific DNA binding RNA polymerase II transcription factor activity(GO:0000981);biological_process:skeletal system development(GO:0001501);molecular_function:sequence-specific DNA binding transcription factor activity(GO:0003700);cellular_component:nucleus(GO:0005634);cell…
ENSDART00000082466	ENSDARG00000059363	19:1280246-1297680	0.292355	0.603823	1.0464	2.82457	0.0003	0.00143914	Ups	TGFBR2 (1 of many)	_	_
ENSDART00000082620	ENSDARG00000007370	7:25287117-25426128	3.50274	1.47271	-1.25001	-4.81092	5e-05	0.000273814	Down	dysf	K18261	biological_process:plasma membrane repair(GO:0001778);cellular_component:membrane(GO:0016020);cellular_component:integral component of membrane(GO:0016021);cellular_component:T-tubule(GO:0030315);biological_process:T-tubule organization(GO:0033292);cellular_component:sarcolemma(GO:0042383);biological_process:muscle organ morphogenesis(GO:0048644)
ENSDART00000082842	ENSDARG00000059534	7:56476256-56492328	2.02011	5.21066	1.36703	9.48245	5e-05	0.000273814	Ups	JPH3 (1 of many)	K19530	cellular_component:membrane(GO:0016020);cellular_component:integral component of membrane(GO:0016021)
ENSDART00000083070	ENSDARG00000059634	6:19933365-19962414	20.9492	8.21593	-1.3504	-5.93378	5e-05	0.000273814	Down	thumpd3	_	molecular_function:tRNA binding(GO:0000049);molecular_function:RNA binding(GO:0003723);molecular_function:tRNA (guanine) methyltransferase activity(GO:0016423)
ENSDART00000083100	ENSDARG00000068296	7:52021660-52059973	0.615858	0.279735	-1.13854	-1.92529	0.01085	0.0349032	Down	SLCO3A1 (1 of many)	_	_
ENSDART00000083126	ENSDARG00000059651	6:19142441-19151867	1.473	5.37975	1.86878	6.39842	5e-05	0.000273814	Ups	cidec	_	cellular_component:intracellular(GO:0005622);cellular_component:lipid particle(GO:0005811);biological_process:apoptotic process(GO:0006915);biological_process:regulation of apoptotic process(GO:0042981)
ENSDART00000083351	ENSDARG00000034211	22:26617034-26646980	13.3545	29.1517	1.12625	2.56957	5e-05	0.000273814	Ups	capn2l	K03853	molecular_function:calcium-dependent cysteine-type endopeptidase activity(GO:0004198);molecular_function:calcium-dependent cysteine-type endopeptidase activity(GO:0004198);molecular_function:calcium ion binding(GO:0005509);cellular_component:intracellular(GO:0005622);cellular_component:cytoplasm(GO:0005737);biological_process:proteolysis(GO:0006508);molecular_function:peptidase activity(GO:000823…
ENSDART00000083394	ENSDARG00000059747	3:38651640-38717447	0.68913	0.308014	-1.16178	-2.05376	0.0109	0.0350439	Down	si:dkey-106c17.3	_	molecular_function:inward rectifier potassium channel activity(GO:0005242);molecular_function:inward rectifier potassium channel activity(GO:0005242);molecular_function:voltage-gated ion channel activity(GO:0005244);cellular_component:integral component of plasma membrane(GO:0005887);biological_process:transport(GO:0006810);biological_process:ion transport(GO:0006811);biological_process:potassium…
ENSDART00000083593	ENSDARG00000074989	1:36693479-36720533	0.568139	1.41788	1.31942	2.90756	0.00155	0.00634657	Ups	sparcl1	_	molecular_function:calcium ion binding(GO:0005509);molecular_function:calcium ion binding(GO:0005509);molecular_function:collagen binding(GO:0005518);cellular_component:proteinaceous extracellular matrix(GO:0005578);cellular_component:extracellular space(GO:0005615);cellular_component:extracellular space(GO:0005615);biological_process:signal transduction(GO:0007165);biological_process:anatomical …
ENSDART00000083827	ENSDARG00000059903	12:404096-522085	2.25644	0.94126	-1.26138	-2.49822	0.0034	0.012741	Down	hs3st3l	_	molecular_function:N-acetylglucosamine 6-O-sulfotransferase activity(GO:0001517);molecular_function:N-acetylgalactosamine 4-O-sulfotransferase activity(GO:0001537);biological_process:cilium movement(GO:0003341);molecular_function:heparan sulfate 2-O-sulfotransferase activity(GO:0004394);molecular_function:sulfotransferase activity(GO:0008146);cellular_component:membrane(GO:0016020);cellular_compo…
ENSDART00000084104	ENSDARG00000060007	14:50263573-50372929	2.02363	0.980538	-1.0453	-2.51582	0.00105	0.00448059	Down	n4bp3	_	cellular_component:postsynaptic density(GO:0014069)
ENSDART00000084861	ENSDARG00000060316	6:41506317-41509213	2.22695	4.73345	1.08782	4.03683	5e-05	0.000273814	Ups	cish	K04701	molecular_function:protein kinase inhibitor activity(GO:0004860);cellular_component:cytoplasm(GO:0005737);biological_process:protein ubiquitination(GO:0016567);biological_process:cytokine-mediated signaling pathway(GO:0019221);biological_process:intracellular signal transduction(GO:0035556);biological_process:negative regulation of lymphocyte differentiation(GO:0045620);biological_process:negativ…
ENSDART00000085210	ENSDARG00000060496	3:39711929-39812369	0.605469	0.26439	-1.19539	-2.58816	0.001	0.00429809	Down	cacna1ha	_	molecular_function:ion channel activity(GO:0005216);molecular_function:voltage-gated ion channel activity(GO:0005244);molecular_function:voltage-gated calcium channel activity(GO:0005245);molecular_function:cation channel activity(GO:0005261);molecular_function:calcium channel activity(GO:0005262);cellular_component:plasma membrane(GO:0005886);cellular_component:voltage-gated calcium channel comp…
ENSDART00000085284	ENSDARG00000060504	9:53087625-53138761	0.944567	2.20783	1.22491	4.92854	5e-05	0.000273814	Ups	pfkla	K00850	molecular_function:nucleotide binding(GO:0000166);molecular_function:catalytic activity(GO:0003824);molecular_function:6-phosphofructokinase activity(GO:0003872);molecular_function:ATP binding(GO:0005524);cellular_component:cytoplasm(GO:0005737);biological_process:fructose 6-phosphate metabolic process(GO:0006002);biological_process:glycolytic process(GO:0006096);biological_process:metabolic proc…
ENSDART00000085294	ENSDARG00000060498	23:29962547-30504802	2.16892	0.981069	-1.14455	-2.61589	0.0015	0.00615809	Down	tnfrsf9a	K05146	molecular_function:tumor necrosis factor-activated receptor activity(GO:0005031);cellular_component:integral component of plasma membrane(GO:0005887);biological_process:inflammatory response(GO:0006954);biological_process:immune response(GO:0006955);biological_process:multicellular organismal development(GO:0007275);biological_process:response to lipopolysaccharide(GO:0032496);biological_process:…
ENSDART00000085370	ENSDARG00000069953	1:30331010-30546217	0.962262	0.114041	-3.07688	-3.63691	0.0058	0.0203222	Down	kcnq5b	_	molecular_function:ion channel activity(GO:0005216);molecular_function:voltage-gated potassium channel activity(GO:0005249);molecular_function:delayed rectifier potassium channel activity(GO:0005251);molecular_function:potassium channel activity(GO:0005267);biological_process:transport(GO:0006810);biological_process:ion transport(GO:0006811);biological_process:potassium ion transport(GO:0006813);…
ENSDART00000085980	ENSDARG00000060768	19:44310097-44365180	2.4712	1.21852	-1.02008	-3.0958	0.00025	0.0012226	Down	ankib1a	_	cellular_component:ubiquitin ligase complex(GO:0000151);biological_process:protein polyubiquitination(GO:0000209);molecular_function:ubiquitin-protein transferase activity(GO:0004842);cellular_component:cytoplasm(GO:0005737);molecular_function:zinc ion binding(GO:0008270);biological_process:protein ubiquitination(GO:0016567);molecular_function:ubiquitin conjugating enzyme binding(GO:0031624);biol…
ENSDART00000086260	ENSDARG00000060889	6:39494309-39634714	0.98507	0.268598	-1.87478	-1.91013	0.01285	0.0403562	Down	si:ch211-173n18.4	_	cellular_component:cytoplasm(GO:0005737);biological_process:metabolic process(GO:0008152);molecular_function:methyltransferase activity(GO:0008168);molecular_function:S-adenosylmethionine-dependent methyltransferase activity(GO:0008757)
ENSDART00000086753	ENSDARG00000061096	7:29007429-29021056	3.03525	1.00156	-1.59956	-7.51907	5e-05	0.000273814	Down	dapk2a	K08803	molecular_function:nucleotide binding(GO:0000166);molecular_function:protein kinase activity(GO:0004672);molecular_function:protein serine/threonine kinase activity(GO:0004674);molecular_function:ATP binding(GO:0005524);biological_process:protein phosphorylation(GO:0006468);molecular_function:kinase activity(GO:0016301);biological_process:phosphorylation(GO:0016310);molecular_function:transferase…
ENSDART00000086797	ENSDARG00000061121	1:22252811-22466844	1.6037	0.79228	-1.01733	-3.24585	5e-05	0.000273814	Down	adgrl3.1	K04594	molecular_function:signal transducer activity(GO:0004871);molecular_function:transmembrane signaling receptor activity(GO:0004888);molecular_function:G-protein coupled receptor activity(GO:0004930);biological_process:signal transduction(GO:0007165);biological_process:cell surface receptor signaling pathway(GO:0007166);biological_process:G-protein coupled receptor signaling pathway(GO:0007186);bio…
ENSDART00000086943	ENSDARG00000061168	18:44573736-44596638	3.0718	0.911639	-1.75255	-8.12615	5e-05	0.000273814	Down	dhx34	K20101	molecular_function:nucleotide binding(GO:0000166);biological_process:nuclear-transcribed mRNA catabolic process, nonsense-mediated decay(GO:0000184);biological_process:nuclear-transcribed mRNA catabolic process(GO:0000956);molecular_function:ATP-dependent RNA helicase activity(GO:0004004);molecular_function:helicase activity(GO:0004386);molecular_function:ATP binding(GO:0005524);cellular_componen…
ENSDART00000087368	ENSDARG00000061335	16:26989971-27227033	3.98389	0.820421	-2.27974	-2.37339	0.01275	0.0400872	Down	galnt1	K00710	molecular_function:alpha-1,6-mannosyltransferase activity(GO:0000009);molecular_function:alpha-1,2-mannosyltransferase activity(GO:0000026);molecular_function:mannosyltransferase activity(GO:0000030);molecular_function:alpha-1,3-mannosyltransferase activity(GO:0000033);cellular_component:Golgi membrane(GO:0000139);molecular_function:alpha-1,3-galactosyltransferase activity(GO:0001962);molecular_f…
ENSDART00000087663	ENSDARG00000061471	9:37671439-37940147	8.08317	3.57664	-1.17631	-9.45922	5e-05	0.000273814	Down	sema5ba	K06841	biological_process:neural crest cell migration(GO:0001755);cellular_component:membrane(GO:0016020);cellular_component:integral component of membrane(GO:0016021);cellular_component:integral component of membrane(GO:0016021);molecular_function:semaphorin receptor binding(GO:0030215);biological_process:positive regulation of cell migration(GO:0030335);molecular_function:chemorepellent activity(GO:00…
ENSDART00000088949	ENSDARG00000061952	1:18869814-18906338	6.52147	15.3716	1.237	15.6904	5e-05	0.000273814	Ups	si:dkey-245p14.7	K11886	_
ENSDART00000089206	ENSDARG00000062045	9:29905633-30183392	1.33081	3.87981	1.54368	2.52216	0.0011	0.0046704	Ups	il1rapl1a	_	molecular_function:interleukin-1 receptor activity(GO:0004908);cellular_component:cytoplasm(GO:0005737);cellular_component:plasma membrane(GO:0005886);biological_process:signal transduction(GO:0007165);cellular_component:membrane(GO:0016020);cellular_component:integral component of membrane(GO:0016021)
ENSDART00000089480	ENSDARG00000062132	1:17207368-17219708	0.468928	2.10056	2.16334	4.42849	5e-05	0.000273814	Ups	cyp4v8	K07427	molecular_function:monooxygenase activity(GO:0004497);molecular_function:iron ion binding(GO:0005506);cellular_component:membrane(GO:0016020);cellular_component:integral component of membrane(GO:0016021);molecular_function:oxidoreductase activity(GO:0016491);molecular_function:oxidoreductase activity, acting on paired donors, with incorporation or reduction of molecular oxygen(GO:0016705);molecul…
ENSDART00000089569	ENSDARG00000062173	22:22317346-22391772	2.60555	0.91222	-1.51413	-3.81633	5e-05	0.000273814	Down	camsap2a	K17493	molecular_function:calmodulin binding(GO:0005516);molecular_function:microtubule binding(GO:0008017);molecular_function:spectrin binding(GO:0030507);biological_process:neuron projection development(GO:0031175)
ENSDART00000089603	ENSDARG00000036295	1:54231243-54254262	1.44393	3.81568	1.40194	3.53342	5e-05	0.000273814	Ups	golga7ba	_	cellular_component:palmitoyltransferase complex(GO:0002178);biological_process:protein targeting to membrane(GO:0006612);biological_process:peptidyl-L-cysteine S-palmitoylation(GO:0018230);molecular_function:protein-cysteine S-palmitoyltransferase activity(GO:0019706);biological_process:protein localization to plasma membrane(GO:0072659)
ENSDART00000089748	ENSDARG00000033498	5:24766523-24806654	4.16729	1.62362	-1.35989	-4.95811	5e-05	0.000273814	Down	rorb	K08533	molecular_function:DNA binding(GO:0003677);molecular_function:sequence-specific DNA binding transcription factor activity(GO:0003700);molecular_function:steroid hormone receptor activity(GO:0003707);molecular_function:ligand-activated sequence-specific DNA binding RNA polymerase II transcription factor activity(GO:0004879);cellular_component:nucleus(GO:0005634);biological_process:transcription, D…
ENSDART00000089787	ENSDARG00000062266	18:21871450-21923162	1.60785	0.253061	-2.66758	-2.46298	0.0103	0.0333606	Down	edc4	K12616	cellular_component:cytoplasmic mRNA processing body(GO:0000932);cellular_component:nucleus(GO:0005634);cellular_component:cytoplasm(GO:0005737)
ENSDART00000089844	ENSDARG00000068941	25:34557394-34558700	0.895988	1.83636	1.0353	2.38909	0.0032	0.0120807	Ups	zgc:113983	K11254	cellular_component:nucleosome(GO:0000786);molecular_function:DNA binding(GO:0003677);cellular_component:nucleus(GO:0005634);cellular_component:chromosome(GO:0005694);molecular_function:protein heterodimerization activity(GO:0046982)
ENSDART00000090486	ENSDARG00000006848	9:23947592-23954611	0.34016	1.06748	1.64993	3.15307	0.00095	0.00410593	Ups	PARP9	K15260	molecular_function:NAD+ ADP-ribosyltransferase activity(GO:0003950);molecular_function:transferase activity(GO:0016740);molecular_function:transferase activity, transferring glycosyl groups(GO:0016757)
ENSDART00000090711	ENSDARG00000062598	14:16064409-16074190	0.121711	1.45351	3.57801	4.49949	0.00055	0.00250382	Ups	ltc4s	K00807	molecular_function:glutathione transferase activity(GO:0004364);molecular_function:leukotriene-C4 synthase activity(GO:0004464);molecular_function:glutathione peroxidase activity(GO:0004602);cellular_component:nuclear envelope(GO:0005635);cellular_component:endoplasmic reticulum(GO:0005783);biological_process:leukotriene metabolic process(GO:0006691);molecular_function:enzyme activator activity(G…
ENSDART00000091159	ENSDARG00000062785	17:11291604-11312634	0.567803	1.32341	1.2208	4.40585	5e-05	0.000273814	Ups	adpgk2	K08074	biological_process:carbohydrate metabolic process(GO:0005975);molecular_function:phosphotransferase activity, alcohol group as acceptor(GO:0016773)
ENSDART00000091700	ENSDARG00000063009	6:12805092-12810683	1.06408	2.8814	1.43716	3.79527	5e-05	0.000273814	Ups	catip	_	cellular_component:nucleus(GO:0005634);cellular_component:nucleus(GO:0005634);cellular_component:cytoplasm(GO:0005737);cellular_component:cytoplasm(GO:0005737);cellular_component:cytoskeleton(GO:0005856);cellular_component:plasma membrane(GO:0005886);cellular_component:plasma membrane(GO:0005886);cellular_component:actin cytoskeleton(GO:0015629);cellular_component:membrane(GO:0016020);biological_…
ENSDART00000092116	ENSDARG00000063191	2:7251630-7260085	5.78009	1.41346	-2.03186	-6.99171	5e-05	0.000273814	Down	extl2	K02369	biological_process:glycosaminoglycan biosynthetic process(GO:0006024);biological_process:heparan sulfate proteoglycan biosynthetic process(GO:0015012);cellular_component:membrane(GO:0016020);cellular_component:integral component of membrane(GO:0016021)
ENSDART00000092333	ENSDARG00000063288	5:9509965-9541545	2.55695	7.77578	1.60456	4.28574	5e-05	0.000273814	Ups	slc2a11b	_	molecular_function:transporter activity(GO:0005215);biological_process:transport(GO:0006810);cellular_component:membrane(GO:0016020);cellular_component:integral component of membrane(GO:0016021);molecular_function:transmembrane transporter activity(GO:0022857);molecular_function:substrate-specific transmembrane transporter activity(GO:0022891);biological_process:transmembrane transport(GO:0055085)
ENSDART00000092480	ENSDARG00000063352	9:7019702-7089867	3.55348	1.65012	-1.10666	-3.04694	5e-05	0.000273814	Down	inpp4aa	_	cellular_component:cytoplasm(GO:0005737);biological_process:signal transduction(GO:0007165);molecular_function:phosphatidylinositol-3,4-bisphosphate 4-phosphatase activity(GO:0016316)
ENSDART00000092522	ENSDARG00000063361	18:12395817-12484832	1.47161	0.677106	-1.11994	-4.32107	5e-05	0.000273814	Down	si:ch211-1e14.1	_	cellular_component:membrane(GO:0016020);cellular_component:integral component of membrane(GO:0016021)
ENSDART00000092536	ENSDARG00000063359	21:44001329-44008484	0.24414	0.697755	1.51501	4.11164	0.0001	0.0005238	Ups	ARSI (1 of many)	K12375	_
ENSDART00000092690	ENSDARG00000063438	3:1338452-1602878	0.315991	0.966672	1.61314	2.47856	0.005	0.0178414	Ups	srebf2	K09107	cellular_component:Golgi membrane(GO:0000139);molecular_function:DNA binding(GO:0003677);cellular_component:nucleus(GO:0005634);cellular_component:endoplasmic reticulum(GO:0005783);cellular_component:endoplasmic reticulum membrane(GO:0005789);cellular_component:Golgi apparatus(GO:0005794);biological_process:transcription, DNA-templated(GO:0006351);biological_process:regulation of transcription, D…
ENSDART00000092718	ENSDARG00000015201	20:1273161-1293711	2.75794	8.05488	1.54627	3.89139	5e-05	0.000273814	Ups	pcmt	K00573	molecular_function:protein-L-isoaspartate (D-aspartate) O-methyltransferase activity(GO:0004719);molecular_function:protein-L-isoaspartate (D-aspartate) O-methyltransferase activity(GO:0004719);cellular_component:cytoplasm(GO:0005737);cellular_component:cytoplasm(GO:0005737);biological_process:cellular protein modification process(GO:0006464);molecular_function:methyltransferase activity(GO:00081…
ENSDART00000093193	ENSDARG00000075274	25:2340578-2358278	1.31795	3.31686	1.33153	6.92202	5e-05	0.000273814	Ups	CABZ01090021.1	_	_
ENSDART00000097427	ENSDARG00000010710	8:39573168-39613442	1.31312	3.5106	1.41872	2.92743	0.00045	0.00208841	Ups	msi1	K14411	molecular_function:nucleotide binding(GO:0000166);molecular_function:nucleic acid binding(GO:0003676);cellular_component:cellular_component(GO:0005575);biological_process:central nervous system development(GO:0007417)
ENSDART00000097714	ENSDARG00000067831	12:47933315-47954871	0.451254	1.62481	1.84826	2.58122	0.0056	0.0197279	Ups	tbata	_	_
ENSDART00000097755	ENSDARG00000067850	2:56001328-56007467	2.27975	1.1349	-1.00631	-6.1524	5e-05	0.000273814	Down	jund	K04449	biological_process:negative regulation of transcription from RNA polymerase II promoter(GO:0000122);cellular_component:nuclear chromatin(GO:0000790);molecular_function:RNA polymerase II core promoter proximal region sequence-specific DNA binding(GO:0000978);molecular_function:sequence-specific DNA binding RNA polymerase II transcription factor activity(GO:0000981);molecular_function:DNA binding(G…
ENSDART00000097796	ENSDARG00000077906	21:4809690-4842598	10.0118	4.0352	-1.31099	-3.1282	5e-05	0.000273814	Down	rnf165a	K17821	biological_process:protein polyubiquitination(GO:0000209);cellular_component:nucleus(GO:0005634);cellular_component:cytoplasm(GO:0005737);biological_process:motor neuron axon guidance(GO:0008045);molecular_function:zinc ion binding(GO:0008270);biological_process:positive regulation of BMP signaling pathway(GO:0030513);biological_process:protein ubiquitination involved in ubiquitin-dependent prote…
ENSDART00000097964	ENSDARG00000074069	1:55793366-55798474	0.82696	2.09233	1.33922	2.43271	0.0027	0.0103597	Ups	zgc:171452	_	molecular_function:GTP binding(GO:0005525);biological_process:biological_process(GO:0008150);cellular_component:membrane(GO:0016020);cellular_component:integral component of membrane(GO:0016021)
ENSDART00000098010	ENSDARG00000035415	5:34798591-34801415	3.68888	1.72577	-1.09595	-3.82225	5e-05	0.000273814	Down	ptger4b	K04261	molecular_function:signal transducer activity(GO:0004871);molecular_function:G-protein coupled receptor activity(GO:0004930);molecular_function:prostaglandin receptor activity(GO:0004955);molecular_function:prostaglandin E receptor activity(GO:0004957);molecular_function:prostaglandin E receptor activity(GO:0004957);cellular_component:integral component of plasma membrane(GO:0005887);biological_p…
ENSDART00000098123	ENSDARG00000068021	2:44928235-45069855	4.49876	1.17848	-1.93259	-3.62983	0.00015	0.000764619	Down	ece2a	_	biological_process:metabolic process(GO:0008152);molecular_function:methyltransferase activity(GO:0008168)
ENSDART00000098132	ENSDARG00000021739	2:44718201-44751457	4.61608	2.1935	-1.07343	-5.36954	5e-05	0.000273814	Down	klhl24a	K10461	molecular_function:ubiquitin-protein transferase activity(GO:0004842);cellular_component:Cul3-RING ubiquitin ligase complex(GO:0031463);biological_process:regulation of kainate selective glutamate receptor activity(GO:2000312)
ENSDART00000098284	ENSDARG00000053293	2:43281728-43286282	2.68564	1.07547	-1.3203	-5.02198	5e-05	0.000273814	Down	ftr14	_	cellular_component:intracellular(GO:0005622);molecular_function:zinc ion binding(GO:0008270);biological_process:intracellular signal transduction(GO:0035556);molecular_function:metal ion binding(GO:0046872)
ENSDART00000098364	ENSDARG00000068157	5:28890030-28914576	0.807639	2.13418	1.4019	2.28277	0.0099	0.0322183	Ups	ehmt1a	K11420	cellular_component:nucleus(GO:0005634);cellular_component:chromosome(GO:0005694);molecular_function:methyltransferase activity(GO:0008168);molecular_function:zinc ion binding(GO:0008270);molecular_function:transferase activity(GO:0016740);molecular_function:histone-lysine N-methyltransferase activity(GO:0018024);biological_process:methylation(GO:0032259);biological_process:histone lysine methylat…
ENSDART00000098687	ENSDARG00000068280	9:50609849-50647860	3.4601	1.66228	-1.05765	-4.45142	5e-05	0.000273814	Down	GRB14	_	_
ENSDART00000098806	ENSDARG00000061439	18:40481633-40487673	1.67971	0.821849	-1.03127	-3.5773	5e-05	0.000273814	Down	ugt5c3	_	biological_process:metabolic process(GO:0008152);biological_process:flavonoid biosynthetic process(GO:0009813);molecular_function:glucuronosyltransferase activity(GO:0015020);molecular_function:glucuronosyltransferase activity(GO:0015020);cellular_component:membrane(GO:0016020);cellular_component:integral component of membrane(GO:0016021);molecular_function:transferase activity(GO:0016740);molecu…
ENSDART00000099030	ENSDARG00000053448	10:8086654-8121037	26.5802	2.0173	-3.71986	-11.1298	5e-05	0.000273814	Down	si:ch211-251f6.6	_	_
ENSDART00000099084	ENSDARG00000068503	5:23264576-23301587	5.97774	12.6732	1.08411	3.86669	5e-05	0.000273814	Ups	gbgt1l4	K00722	cellular_component:Golgi apparatus(GO:0005794);biological_process:carbohydrate metabolic process(GO:0005975);biological_process:glycolipid biosynthetic process(GO:0009247);cellular_component:membrane(GO:0016020);cellular_component:integral component of membrane(GO:0016021);molecular_function:transferase activity(GO:0016740);molecular_function:transferase activity, transferring glycosyl groups(GO:…
ENSDART00000099320	ENSDARG00000026322	10:36848875-37131603	3.03763	1.11525	-1.44558	-2.23312	0.00575	0.0201723	Down	dhrs13a.1	_	cellular_component:cellular_component(GO:0005575)
ENSDART00000099326	ENSDARG00000062042	18:30900036-30971842	0.333611	1.14204	1.77537	2.86038	0.0023	0.00899296	Ups	mthfsd	_	molecular_function:nucleotide binding(GO:0000166);molecular_function:RNA binding(GO:0003723);cellular_component:cytoplasm(GO:0005737);biological_process:intracellular mRNA localization(GO:0008298);cellular_component:membrane(GO:0016020);cellular_component:integral component of membrane(GO:0016021)
ENSDART00000099517	ENSDARG00000068729	13:49894507-49921052	0.915121	0.148852	-2.62008	-2.36057	0.0093	0.0305145	Down	eif2ak2	K16195	molecular_function:double-stranded RNA binding(GO:0003725);molecular_function:protein kinase activity(GO:0004672);molecular_function:protein kinase activity(GO:0004672);molecular_function:protein serine/threonine kinase activity(GO:0004674);molecular_function:ATP binding(GO:0005524);biological_process:protein phosphorylation(GO:0006468);biological_process:negative regulation of cell proliferation…
ENSDART00000099943	ENSDARG00000043781	4:75630954-75639856	5.532	1.29057	-2.09979	-5.3113	5e-05	0.000273814	Down	PSMB10	K02739	cellular_component:proteasome complex(GO:0000502);molecular_function:endopeptidase activity(GO:0004175);molecular_function:threonine-type endopeptidase activity(GO:0004298);cellular_component:nucleus(GO:0005634);cellular_component:cytoplasm(GO:0005737);cellular_component:proteasome core complex(GO:0005839);biological_process:proteolysis(GO:0006508);molecular_function:peptidase activity(GO:0008233…
ENSDART00000100100	ENSDARG00000069027	18:16809787-16811967	0.431787	0.959641	1.15217	2.02764	0.0099	0.0322183	Ups	BX005395.1	_	_
ENSDART00000100159	ENSDARG00000069043	2:53729739-53753878	0.662025	1.49361	1.17385	3.75316	5e-05	0.000273814	Ups	HSD11B1L (1 of many)	K15680	_
ENSDART00000100207	ENSDARG00000069065	10:28484190-28494303	12.3738	3.82092	-1.69529	-4.3224	5e-05	0.000273814	Down	btg3	K14443	molecular_function:molecular_function(GO:0003674);cellular_component:cellular_component(GO:0005575);biological_process:biological_process(GO:0008150)
ENSDART00000100281	ENSDARG00000055331	8:21050275-21071473	1.65983	0.465598	-1.83388	-3.22683	5e-05	0.000273814	Down	aldh9a1a.2	_	biological_process:metabolic process(GO:0008152);molecular_function:oxidoreductase activity(GO:0016491);molecular_function:oxidoreductase activity, acting on the aldehyde or oxo group of donors, NAD or NADP as acceptor(GO:0016620);molecular_function:aminobutyraldehyde dehydrogenase activity(GO:0019145);molecular_function:4-trimethylammoniobutyraldehyde dehydrogenase activity(GO:0047105);biologica…
ENSDART00000100329	ENSDARG00000029493	10:26786041-26795773	3.36444	11.5956	1.78514	10.4524	5e-05	0.000273814	Ups	f9b	K01321	molecular_function:serine-type endopeptidase activity(GO:0004252);molecular_function:calcium ion binding(GO:0005509);cellular_component:extracellular region(GO:0005576);biological_process:proteolysis(GO:0006508);biological_process:blood coagulation(GO:0007596);molecular_function:peptidase activity(GO:0008233);molecular_function:serine-type peptidase activity(GO:0008236);molecular_function:hydrola…
ENSDART00000100444	ENSDARG00000069160	4:27262565-27409126	0.394826	0.8832	1.16153	1.9342	0.0133	0.0415917	Ups	fam19a5a	_	cellular_component:membrane(GO:0016020);cellular_component:integral component of membrane(GO:0016021)
ENSDART00000100619	ENSDARG00000019765	1:54491478-54505437	7.29246	17.1453	1.23334	12.7832	5e-05	0.000273814	Ups	zgc:158803	_	molecular_function:mRNA binding(GO:0003729);molecular_function:mRNA binding(GO:0003729);cellular_component:U1 snRNP(GO:0005685);cellular_component:U1 snRNP(GO:0005685);biological_process:mRNA splice site selection(GO:0006376);biological_process:mRNA splice site selection(GO:0006376);cellular_component:U2-type prespliceosome(GO:0071004)
ENSDART00000100700	ENSDARG00000069289	9:35205327-35216332	6.08638	2.86513	-1.08698	-4.26906	5e-05	0.000273814	Down	gabpa	K09441	molecular_function:sequence-specific DNA binding RNA polymerase II transcription factor activity(GO:0000981);molecular_function:DNA binding(GO:0003677);molecular_function:sequence-specific DNA binding transcription factor activity(GO:0003700);cellular_component:nucleus(GO:0005634);cellular_component:nucleus(GO:0005634);biological_process:regulation of transcription, DNA-templated(GO:0006355);biol…
ENSDART00000100737	ENSDARG00000088524	4:25617859-25714870	1.45661	6.29038	2.11053	3.9122	5e-05	0.000273814	Ups	zgc:77651	_	biological_process:acyl-CoA metabolic process(GO:0006637);cellular_component:membrane(GO:0016020);cellular_component:integral component of membrane(GO:0016021);molecular_function:thiolester hydrolase activity(GO:0016790)
ENSDART00000100782	ENSDARG00000069326	7:19598920-19628298	14.6903	1.09797	-3.74195	-6.92757	5e-05	0.000273814	Down	mus81	K08991	molecular_function:DNA binding(GO:0003677);molecular_function:nuclease activity(GO:0004518);molecular_function:endonuclease activity(GO:0004519);cellular_component:nucleus(GO:0005634);biological_process:DNA metabolic process(GO:0006259);biological_process:DNA repair(GO:0006281);biological_process:DNA recombination(GO:0006310);biological_process:cellular response to DNA damage stimulus(GO:0006974)…
ENSDART00000100922	ENSDARG00000069382	13:21526262-21529753	1.09767	0.178733	-2.61857	-3.4889	0.00145	0.00597214	Down	mxtx1	_	biological_process:somite specification(GO:0001757);molecular_function:DNA binding(GO:0003677);cellular_component:nucleus(GO:0005634);biological_process:positive regulation of cell migration(GO:0030335);biological_process:embryonic heart tube development(GO:0035050);biological_process:positive regulation of transcription, DNA-templated(GO:0045893);biological_process:positive regulation of transcr…
ENSDART00000100961	ENSDARG00000013161	3:16513572-16530171	5.55772	11.3466	1.0297	2.40942	0.0026	0.0100339	Ups	zgc:55558	K07827	molecular_function:nucleotide binding(GO:0000166);molecular_function:GTP binding(GO:0005525);biological_process:signal transduction(GO:0007165);biological_process:small GTPase mediated signal transduction(GO:0007264);cellular_component:membrane(GO:0016020)
ENSDART00000101125	ENSDARG00000058451	8:2435243-2447841	19.7507	8.85077	-1.15803	-1.74793	0.0076	0.0256787	Down	rpl6	K02934	biological_process:ribosomal large subunit assembly(GO:0000027);biological_process:cytoplasmic translation(GO:0002181);molecular_function:structural constituent of ribosome(GO:0003735);molecular_function:structural constituent of ribosome(GO:0003735);cellular_component:intracellular(GO:0005622);cellular_component:ribosome(GO:0005840);biological_process:translation(GO:0006412);cellular_component:c…
ENSDART00000101159	ENSDARG00000069478	8:28658003-28685072	1.01184	0.475628	-1.08907	-3.17977	5e-05	0.000273814	Down	slc13a3	K14445	molecular_function:transporter activity(GO:0005215);cellular_component:integral component of plasma membrane(GO:0005887);biological_process:sodium ion transport(GO:0006814);molecular_function:citrate transmembrane transporter activity(GO:0015137);molecular_function:succinate transmembrane transporter activity(GO:0015141);cellular_component:membrane(GO:0016020);cellular_component:integral componen…
ENSDART00000101479	ENSDARG00000022614	13:27202205-27223583	3.26123	0.335151	-3.28253	-7.30036	5e-05	0.000273814	Down	ddx43	K17043	molecular_function:nucleotide binding(GO:0000166);molecular_function:nucleic acid binding(GO:0003676);molecular_function:RNA binding(GO:0003723);molecular_function:ATP-dependent RNA helicase activity(GO:0004004);molecular_function:helicase activity(GO:0004386);molecular_function:ATP binding(GO:0005524);biological_process:RNA secondary structure unwinding(GO:0010501);molecular_function:hydrolase a…
ENSDART00000101578	ENSDARG00000069675	15:7179384-7182068	6.95788	2.23991	-1.63521	-5.54526	5e-05	0.000273814	Down	her8.2	K09087	molecular_function:DNA binding(GO:0003677);cellular_component:nucleus(GO:0005634);biological_process:transcription, DNA-templated(GO:0006351);biological_process:regulation of transcription, DNA-templated(GO:0006355);molecular_function:protein dimerization activity(GO:0046983)
ENSDART00000101580	ENSDARG00000069677	22:33408074-33424025	0.656081	1.85597	1.50023	2.92915	0.00105	0.00448059	Ups	nicn1	K16607	molecular_function:molecular_function(GO:0003674);cellular_component:cellular_component(GO:0005575);biological_process:biological_process(GO:0008150)
ENSDART00000101613	ENSDARG00000069698	4:15820972-15842044	0.721134	0.357425	-1.01262	-2.15637	0.005	0.0178414	Down	lrguk	_	_
ENSDART00000101734	ENSDARG00000088330	3:54859450-54884525	25.0049	66.3299	1.40745	3.00114	5e-05	0.000273814	Ups	si:ch211-5k11.2	K13826	molecular_function:oxygen transporter activity(GO:0005344);molecular_function:iron ion binding(GO:0005506);cellular_component:hemoglobin complex(GO:0005833);biological_process:transport(GO:0006810);biological_process:oxygen transport(GO:0015671);molecular_function:oxygen binding(GO:0019825);molecular_function:heme binding(GO:0020037);molecular_function:metal ion binding(GO:0046872)
ENSDART00000101809	ENSDARG00000073874	9:22316748-22528713	1.70843	4.54407	1.41131	1.98033	0.01405	0.0435809	Ups	crygm2d6	_	cellular_component:cellular_component(GO:0005575)
ENSDART00000101859	ENSDARG00000069795	13:18414826-18493243	2.09501	4.39262	1.06812	3.34282	5e-05	0.000273814	Ups	zgc:154058	_	molecular_function:molecular_function(GO:0003674);cellular_component:lysosome(GO:0005764);cellular_component:membrane(GO:0016020);cellular_component:integral component of membrane(GO:0016021)
ENSDART00000101869	ENSDARG00000069801	9:22316748-22528713	3.44975	10.0176	1.53798	3.73548	5e-05	0.000273814	Ups	crygm2d12	_	molecular_function:molecular_function(GO:0003674);cellular_component:cellular_component(GO:0005575);biological_process:biological_process(GO:0008150)
ENSDART00000101928	ENSDARG00000057460	9:22280291-22281456	14.1951	36.1359	1.34804	7.80153	5e-05	0.000273814	Ups	crygm2d13	_	cellular_component:cellular_component(GO:0005575)
ENSDART00000101953	ENSDARG00000069833	16:33188703-33198552	3.23274	7.15176	1.14554	5.28802	5e-05	0.000273814	Ups	rhbdl2	K02857	molecular_function:serine-type endopeptidase activity(GO:0004252);molecular_function:serine-type endopeptidase activity(GO:0004252);cellular_component:mitochondrial inner membrane(GO:0005743);biological_process:proteolysis(GO:0006508);molecular_function:peptidase activity(GO:0008233);cellular_component:membrane(GO:0016020);cellular_component:integral component of membrane(GO:0016021);cellular_com…
ENSDART00000102091	ENSDARG00000039100	7:8112588-8116769	0	0.771252	inf	-nan	5e-05	0.000273814	Ups	zgc:172244	_	molecular_function:molecular_function(GO:0003674);cellular_component:cellular_component(GO:0005575);biological_process:biological_process(GO:0008150)
ENSDART00000102404	ENSDARG00000006251	21:11656468-11682336	9.20673	4.4718	-1.04183	-3.29541	5e-05	0.000273814	Down	ell2	_	biological_process:transcription elongation from RNA polymerase II promoter(GO:0006368);cellular_component:transcription elongation factor complex(GO:0008023)
ENSDART00000102629	ENSDARG00000070116	7:7261664-7274119	1.7853	6.33919	1.82813	6.74152	5e-05	0.000273814	Ups	nit1	_	cellular_component:cellular_component(GO:0005575);biological_process:nitrogen compound metabolic process(GO:0006807);molecular_function:hydrolase activity, acting on carbon-nitrogen (but not peptide) bonds(GO:0016810)
ENSDART00000102643	ENSDARG00000019208	21:4547568-4599559	1.17411	0.513024	-1.19448	-3.59834	5e-05	0.000273814	Down	camsap1a	K17493	molecular_function:calmodulin binding(GO:0005516);molecular_function:microtubule binding(GO:0008017);molecular_function:spectrin binding(GO:0030507);biological_process:neuron projection development(GO:0031175)
ENSDART00000102656	ENSDARG00000070126	4:9900199-9908455	0.51057	1.87245	1.87475	2.98211	0.00055	0.00250382	Ups	si:dkey-22l11.6	_	_
ENSDART00000102823	ENSDARG00000006978	9:2890882-2930145	0.469038	0.985111	1.07058	2.34938	0.0013	0.00542878	Ups	zak	K04424	molecular_function:nucleotide binding(GO:0000166);biological_process:activation of MAPKK activity(GO:0000186);molecular_function:protein kinase activity(GO:0004672);molecular_function:MAP kinase kinase kinase activity(GO:0004709);molecular_function:ATP binding(GO:0005524);biological_process:protein phosphorylation(GO:0006468);molecular_function:kinase activity(GO:0016301);biological_process:phosp…
ENSDART00000102876	ENSDARG00000095577	9:3519190-3563495	5.24406	10.7607	1.03701	3.57307	5e-05	0.000273814	Ups	cybrd1	K08370	molecular_function:ferric-chelate reductase activity(GO:0000293);biological_process:transport(GO:0006810);molecular_function:N-ethylmaleimide reductase activity(GO:0008748);biological_process:response to iron ion(GO:0010039);cellular_component:membrane(GO:0016020);cellular_component:integral component of membrane(GO:0016021);molecular_function:oxidoreductase activity(GO:0016491);molecular_functio…
ENSDART00000102929	ENSDARG00000070239	1:10402845-10420694	10.1116	21.3214	1.0763	4.05535	5e-05	0.000273814	Ups	casc5	K11542	_
ENSDART00000103006	ENSDARG00000070280	25:35798681-35799293	1.56888	0	-inf	-nan	5e-05	0.000273814	Down	zgc:173652	K11251	_
ENSDART00000103236	ENSDARG00000056376	1:17002488-17005836	7.80319	3.03655	-1.36163	-5.34376	5e-05	0.000273814	Down	ankrd37	_	_
ENSDART00000103239	ENSDARG00000070391	3:32455295-32487920	8.47056	17.5387	1.05001	8.00234	5e-05	0.000273814	Ups	tspan4b	_	molecular_function:molecular_function(GO:0003674);cellular_component:integral component of plasma membrane(GO:0005887);biological_process:cell surface receptor signaling pathway(GO:0007166);cellular_component:membrane(GO:0016020);cellular_component:integral component of membrane(GO:0016021)
ENSDART00000103246	ENSDARG00000054010	3:32346067-32358907	3.65345	0.595889	-2.61614	-4.63917	0.0001	0.0005238	Down	scaf1	_	_
ENSDART00000103279	ENSDARG00000070408	4:5124195-5141777	0.855048	1.74299	1.02749	2.24527	0.00175	0.00707831	Ups	ccnd2b	_	cellular_component:nucleus(GO:0005634);biological_process:cell cycle(GO:0007049)
ENSDART00000103350	ENSDARG00000027279	17:51732870-51804088	0.880706	0.21828	-2.01248	-4.47917	5e-05	0.000273814	Down	numb	K06057	cellular_component:cytoplasm(GO:0005737);cellular_component:plasma membrane(GO:0005886);cellular_component:basolateral plasma membrane(GO:0016323);biological_process:primitive erythrocyte differentiation(GO:0060319);biological_process:primitive erythrocyte differentiation(GO:0060319)
ENSDART00000103447	ENSDARG00000070465	3:30370125-30373577	0.872364	1.81694	1.05851	3.84845	5e-05	0.000273814	Ups	si:dkey-13n23.3	_	molecular_function:nucleic acid binding(GO:0003676);molecular_function:DNA binding(GO:0003677)
ENSDART00000103491	ENSDARG00000070486	6:45930358-45931486	26.381	10.2719	-1.3608	-7.17104	5e-05	0.000273814	Down	rbp7b	_	molecular_function:transporter activity(GO:0005215);cellular_component:cellular_component(GO:0005575);biological_process:transport(GO:0006810);molecular_function:lipid binding(GO:0008289)
ENSDART00000103493	ENSDARG00000070487	17:45430071-45663802	1.0464	2.32283	1.15045	2.2494	0.006	0.0209232	Ups	MARC2	_	molecular_function:catalytic activity(GO:0003824);cellular_component:mitochondrion(GO:0005739);cellular_component:mitochondrial outer membrane(GO:0005741);molecular_function:N-ethylmaleimide reductase activity(GO:0008748);cellular_component:membrane(GO:0016020);cellular_component:integral component of membrane(GO:0016021);molecular_function:oxidoreductase activity(GO:0016491);molecular_function:m…
ENSDART00000103612	ENSDARG00000035954	19:31973180-31989008	3.77835	1.2586	-1.58594	-3.65901	5e-05	0.000273814	Down	tdp2b	K19619	molecular_function:magnesium ion binding(GO:0000287);molecular_function:DNA binding(GO:0003677);molecular_function:single-stranded DNA binding(GO:0003697);molecular_function:cyclic-nucleotide phosphodiesterase activity(GO:0004112);molecular_function:3',5'-cyclic-AMP phosphodiesterase activity(GO:0004115);molecular_function:calmodulin-dependent cyclic-nucleotide phosphodiesterase activity(GO:00041…
ENSDART00000103630	ENSDARG00000070536	16:20723380-20901923	1.20862	0.469465	-1.36428	-3.69309	5e-05	0.000273814	Down	creb5b	K09047	molecular_function:nucleic acid binding(GO:0003676);molecular_function:sequence-specific DNA binding transcription factor activity(GO:0003700);biological_process:regulation of transcription, DNA-templated(GO:0006355);molecular_function:sequence-specific DNA binding(GO:0043565);molecular_function:metal ion binding(GO:0046872)
ENSDART00000103659	ENSDARG00000070546	4:149699-340476	1.08833	0.458722	-1.24643	-2.10844	0.00365	0.0135596	Down	msgn1	K09077	molecular_function:RNA polymerase II transcription factor binding transcription factor activity(GO:0001076);molecular_function:DNA binding(GO:0003677);cellular_component:nucleus(GO:0005634);cellular_component:nucleus(GO:0005634);biological_process:transcription, DNA-templated(GO:0006351);biological_process:regulation of transcription, DNA-templated(GO:0006355);biological_process:multicellular org…
ENSDART00000103795	ENSDARG00000070581	1:2306299-2309752	0.384065	2.95523	2.94385	6.06005	5e-05	0.000273814	Ups	ggact.1	K19761	molecular_function:gamma-glutamylcyclotransferase activity(GO:0003839);molecular_function:gamma-glutamylcyclotransferase activity(GO:0003839);cellular_component:membrane(GO:0016020);cellular_component:integral component of membrane(GO:0016021);molecular_function:transferase activity(GO:0016740);molecular_function:transferase activity, transferring acyl groups(GO:0016746);biological_process:cellul…
ENSDART00000104009	ENSDARG00000053896	17:37268234-37273459	7.55541	3.60236	-1.06857	-6.07214	5e-05	0.000273814	Down	slc30a1b	_	molecular_function:zinc ion transmembrane transporter activity(GO:0005385);cellular_component:endoplasmic reticulum(GO:0005783);cellular_component:Golgi apparatus(GO:0005794);cellular_component:plasma membrane(GO:0005886);biological_process:cation transport(GO:0006812);molecular_function:cation transmembrane transporter activity(GO:0008324);biological_process:response to zinc ion(GO:0010043);cell…
ENSDART00000104140	ENSDARG00000070734	25:16689529-16736502	0.501575	1.55188	1.62948	4.07422	0.0001	0.0005238	Ups	dyrk4	K18669	molecular_function:protein kinase activity(GO:0004672);molecular_function:ATP binding(GO:0005524);biological_process:protein phosphorylation(GO:0006468)
ENSDART00000104361	ENSDARG00000070845	3:15275984-15301297	0.695056	1.6158	1.21705	2.40657	0.00245	0.00950758	Ups	si:dkey-56d12.4	_	molecular_function:nucleic acid binding(GO:0003676)
ENSDART00000104405	ENSDARG00000070873	11:6264426-6268468	4.55252	10.518	1.20812	4.62051	5e-05	0.000273814	Ups	ccl25b	K13072	biological_process:monocyte chemotaxis(GO:0002548);cellular_component:extracellular region(GO:0005576);cellular_component:extracellular space(GO:0005615);biological_process:inflammatory response(GO:0006954);biological_process:immune response(GO:0006955);biological_process:G-protein coupled receptor signaling pathway(GO:0007186);molecular_function:chemokine activity(GO:0008009);molecular_function:…
ENSDART00000104528	ENSDARG00000040747	22:38174319-38184761	1.26599	0.462914	-1.45146	-2.75617	0.0011	0.0046704	Down	tm4sf4	_	molecular_function:molecular_function(GO:0003674);cellular_component:membrane(GO:0016020);cellular_component:integral component of membrane(GO:0016021);cellular_component:integral component of membrane(GO:0016021);biological_process:endocrine pancreas development(GO:0031018);biological_process:pancreatic epsilon cell differentiation(GO:0090104);biological_process:negative regulation of type B pan…
ENSDART00000104596	ENSDARG00000070950	19:9748055-9764583	1.48374	0.623266	-1.25132	-2.58402	0.0019	0.00760463	Down	STYK1 (1 of many)	K17510	molecular_function:protein kinase activity(GO:0004672);molecular_function:ATP binding(GO:0005524);biological_process:protein phosphorylation(GO:0006468);cellular_component:membrane(GO:0016020);cellular_component:integral component of membrane(GO:0016021)
ENSDART00000104628	ENSDARG00000070966	6:30716913-30721209	3.30819	0.921465	-1.84404	-2.95156	0.00185	0.00743006	Down	insl5a	K05255	molecular_function:G-protein coupled receptor binding(GO:0001664);molecular_function:hormone activity(GO:0005179);molecular_function:hormone activity(GO:0005179);cellular_component:extracellular region(GO:0005576);cellular_component:extracellular region(GO:0005576);biological_process:positive regulation of feeding behavior(GO:2000253)
ENSDART00000104728	ENSDARG00000054418	22:31010537-31024596	1.49661	0.456696	-1.71239	-2.96154	0.00265	0.0102015	Down	ssuh2.2	_	cellular_component:cellular_component(GO:0005575);molecular_function:heat shock protein binding(GO:0031072);molecular_function:unfolded protein binding(GO:0051082)
ENSDART00000104859	ENSDARG00000071074	25:3091674-3104443	4.29038	1.62264	-1.40276	-4.12019	5e-05	0.000273814	Down	rccd1	_	_
ENSDART00000104969	ENSDARG00000071143	22:27327526-27333883	5.9956	0	-inf	-nan	5e-05	0.000273814	Down	si:dkey-208m12.2	_	cellular_component:membrane(GO:0016020);cellular_component:integral component of membrane(GO:0016021)
ENSDART00000105034	ENSDARG00000036832	19:5433425-5464284	98.3792	8.34967	-3.55856	-5.96417	5e-05	0.000273814	Down	cyt1l	_	molecular_function:structural molecule activity(GO:0005198);cellular_component:intermediate filament(GO:0005882)
ENSDART00000105455	ENSDARG00000002293	22:17435605-17474535	0.864387	2.56754	1.57064	3.90923	5e-05	0.000273814	Ups	si:ch211-197g15.9	_	molecular_function:GTP binding(GO:0005525)
ENSDART00000105553	ENSDARG00000042484	22:21593142-21642854	10.808	1.60936	-2.74754	-2.84714	0.0075	0.02539	Down	tle2	_	cellular_component:nucleus(GO:0005634);biological_process:regulation of transcription, DNA-templated(GO:0006355)
ENSDART00000105561	ENSDARG00000008767	22:21644186-21730724	1.20071	0.569913	-1.07508	-3.76329	5e-05	0.000273814	Down	si:dkey-42p8.3	_	cellular_component:nucleus(GO:0005634);biological_process:regulation of transcription, DNA-templated(GO:0006355)
ENSDART00000105936	ENSDARG00000094427	22:9874570-9877108	0.799281	2.27988	1.51218	2.30388	0.0098	0.0319226	Ups	si:dkey-253d23.8	_	molecular_function:nucleic acid binding(GO:0003676);molecular_function:metal ion binding(GO:0046872)
ENSDART00000106062	ENSDARG00000071629	22:7511515-7533751	4.12343	1.32992	-1.6325	-6.66167	5e-05	0.000273814	Down	BX511034.1	_	_
ENSDART00000106636	ENSDARG00000059360	22:575529-585244	66.526	147.229	1.14607	11.3406	5e-05	0.000273814	Ups	srsf3b	K12892	molecular_function:nucleotide binding(GO:0000166);molecular_function:nucleic acid binding(GO:0003676)
ENSDART00000106680	ENSDARG00000076679	3:61765144-61816674	0.277823	0.596184	1.10159	3.92828	5e-05	0.000273814	Ups	FQ312026.2	K19749	_
ENSDART00000108579	ENSDARG00000011299	1:127249-596152	6.18622	15.5687	1.33152	2.45531	0.0007	0.00311162	Ups	blzf1	_	biological_process:Golgi organization(GO:0007030);biological_process:Golgi to plasma membrane protein transport(GO:0043001)
ENSDART00000108646	ENSDARG00000076870	7:55026810-55332064	7.11783	3.38081	-1.07407	-8.51728	5e-05	0.000273814	Down	piezo1	_	biological_process:transport(GO:0006810);biological_process:ion transport(GO:0006811);biological_process:cell volume homeostasis(GO:0006884);molecular_function:mechanically-gated ion channel activity(GO:0008381);cellular_component:membrane(GO:0016020);cellular_component:integral component of membrane(GO:0016021);biological_process:erythrocyte homeostasis(GO:0034101);biological_process:homeostasis…
ENSDART00000108719	ENSDARG00000087765	9:22316748-22528713	7.16191	25.1259	1.81076	4.11565	5e-05	0.000273814	Ups	crygm2d10	_	molecular_function:molecular_function(GO:0003674);cellular_component:cellular_component(GO:0005575);biological_process:biological_process(GO:0008150)
ENSDART00000108748	ENSDARG00000086912	9:22310883-22311721	2.92599	15.2153	2.37852	6.68987	5e-05	0.000273814	Ups	crygm2d18	_	cellular_component:cellular_component(GO:0005575)
ENSDART00000108821	ENSDARG00000076277	1:43284252-43286709	0.617036	0.189032	-1.70673	-2.12835	0.0104	0.0336533	Down	CR385050.1	_	_
ENSDART00000108844	ENSDARG00000075111	9:13657451-13705602	0.246373	0.642507	1.38287	4.04306	5e-05	0.000273814	Ups	als2a	K04575	molecular_function:Rho guanyl-nucleotide exchange factor activity(GO:0005089);cellular_component:cytoplasm(GO:0005737);cellular_component:early endosome(GO:0005769);cellular_component:centrosome(GO:0005813);biological_process:axonogenesis(GO:0007409);biological_process:neuromuscular junction development(GO:0007528);cellular_component:postsynaptic density(GO:0014069);biological_process:vesicle org…
ENSDART00000108987	ENSDARG00000074582	14:22294338-22411592	1.53716	0.421335	-1.86723	-3.88053	5e-05	0.000273814	Down	graf4b	_	molecular_function:receptor activity(GO:0004872);cellular_component:membrane(GO:0016020);cellular_component:integral component of membrane(GO:0016021)
ENSDART00000109016	ENSDARG00000079305	3:54891984-54893256	939.631	1973.59	1.07066	6.55356	5e-05	0.000273814	Ups	hbae3	_	molecular_function:oxygen transporter activity(GO:0005344);molecular_function:iron ion binding(GO:0005506);cellular_component:hemoglobin complex(GO:0005833);biological_process:transport(GO:0006810);biological_process:oxygen transport(GO:0015671);molecular_function:oxygen binding(GO:0019825);molecular_function:heme binding(GO:0020037);molecular_function:metal ion binding(GO:0046872)
ENSDART00000109340	ENSDARG00000015524	5:22632743-22643860	5.18731	10.7195	1.04718	2.71119	0.0001	0.0005238	Ups	prps1a	_	molecular_function:magnesium ion binding(GO:0000287);molecular_function:ribose phosphate diphosphokinase activity(GO:0004749);biological_process:nucleoside metabolic process(GO:0009116);biological_process:ribonucleoside monophosphate biosynthetic process(GO:0009156);biological_process:nucleotide biosynthetic process(GO:0009165);biological_process:cellular biosynthetic process(GO:0044249)
ENSDART00000109344	ENSDARG00000077073	6:11801203-11962545	2.6447	1.09131	-1.27704	-2.61784	0.0029	0.0110452	Down	tanc1a	_	_
ENSDART00000109604	ENSDARG00000034321	24:29927995-29990985	0.477042	1.03602	1.11887	2.61097	0.002	0.00795471	Ups	palmdb	_	biological_process:regulation of cell shape(GO:0008360);cellular_component:membrane(GO:0016020)
ENSDART00000109732	ENSDARG00000079620	8:25097679-25101092	1.09265	0.168937	-2.69328	-3.1718	0.0043	0.0156761	Down	amigo1	_	cellular_component:integral component of plasma membrane(GO:0005887);biological_process:cell adhesion(GO:0007155);biological_process:axonal fasciculation(GO:0007413);biological_process:brain development(GO:0007420);cellular_component:membrane(GO:0016020);cellular_component:integral component of membrane(GO:0016021);biological_process:myelination(GO:0042552)
ENSDART00000109826	ENSDARG00000001129	17:19400152-19446478	2.41317	0.25996	-3.21457	-5.82516	5e-05	0.000273814	Down	dicer1	K11592	molecular_function:nucleotide binding(GO:0000166);molecular_function:DNA binding(GO:0003677);molecular_function:RNA binding(GO:0003723);molecular_function:helicase activity(GO:0004386);molecular_function:nuclease activity(GO:0004518);molecular_function:endonuclease activity(GO:0004519);molecular_function:ribonuclease III activity(GO:0004525);molecular_function:ribonuclease III activity(GO:0004525…
ENSDART00000109831	ENSDARG00000074434	17:45430071-45663802	1.02474	2.08149	1.02235	1.90798	0.00975	0.0317931	Ups	BX088653.1	_	_
ENSDART00000109891	ENSDARG00000077567	17:52526596-52543831	0.972582	0.41663	-1.22305	-2.74241	0.00095	0.00410593	Down	angel1	K18729	_
ENSDART00000109937	ENSDARG00000074322	25:13094885-13097591	4.8675	2.2873	-1.08954	-3.42362	5e-05	0.000273814	Down	si:ch211-194m7.3	_	_
ENSDART00000110200	ENSDARG00000042094	22:20110416-20130342	6.73419	0.974807	-2.78832	-6.35322	5e-05	0.000273814	Down	eef2a.1	_	molecular_function:translation elongation factor activity(GO:0003746);molecular_function:GTPase activity(GO:0003924);molecular_function:GTPase activity(GO:0003924);molecular_function:GTP binding(GO:0005525);cellular_component:intracellular(GO:0005622);biological_process:translation(GO:0006412);biological_process:translation(GO:0006412);biological_process:translational elongation(GO:0006414)
ENSDART00000110260	ENSDARG00000074346	16:26635910-26654971	1.69955	3.70779	1.12541	3.59211	5e-05	0.000273814	Ups	l3mbtl1b	_	molecular_function:sequence-specific DNA binding transcription factor activity(GO:0003700);cellular_component:nucleus(GO:0005634);biological_process:regulation of transcription, DNA-templated(GO:0006355);molecular_function:zinc ion binding(GO:0008270)
ENSDART00000110411	ENSDARG00000079397	9:44292568-44487894	1.13882	0.292523	-1.96091	-3.57493	0.0002	0.000995331	Down	cerkl	K19602	cellular_component:nucleus(GO:0005634);cellular_component:nucleolus(GO:0005730);cellular_component:cytosol(GO:0005829);biological_process:retina layer formation(GO:0010842);molecular_function:kinase activity(GO:0016301);biological_process:photoreceptor cell development(GO:0042461);biological_process:negative regulation of oxidative stress-induced intrinsic apoptotic signaling pathway(GO:1902176)
ENSDART00000110424	ENSDARG00000077169	14:11144483-11150710	2.14399	1.0213	-1.06989	-4.39626	5e-05	0.000273814	Down	si:ch211-153b23.4	_	molecular_function:tRNA binding(GO:0000049);biological_process:tRNA threonylcarbamoyladenosine modification(GO:0002949);molecular_function:double-stranded RNA binding(GO:0003725);cellular_component:cytoplasm(GO:0005737);biological_process:regulation of translational fidelity(GO:0006450);cellular_component:membrane(GO:0016020);cellular_component:integral component of membrane(GO:0016021);molecular…
ENSDART00000110628	ENSDARG00000077202	10:9112743-9123921	3.69791	0.53288	-2.79483	-4.72014	5e-05	0.000273814	Down	mocs2	K03635	molecular_function:nucleotide binding(GO:0000166);cellular_component:cytoplasm(GO:0005737);cellular_component:cytosol(GO:0005829);cellular_component:cytosol(GO:0005829);biological_process:Mo-molybdopterin cofactor biosynthetic process(GO:0006777);molecular_function:transferase activity(GO:0016740);cellular_component:molybdopterin synthase complex(GO:0019008);molecular_function:molybdopterin synth…
ENSDART00000110656	ENSDARG00000091148	9:22316748-22528713	4.847	15.3071	1.65904	5.54091	5e-05	0.000273814	Ups	crygm2d20	_	molecular_function:molecular_function(GO:0003674);cellular_component:cellular_component(GO:0005575);biological_process:biological_process(GO:0008150)
ENSDART00000110690	ENSDARG00000087345	1:55990641-55992780	0.477696	1.46249	1.61427	3.87293	5e-05	0.000273814	Ups	CABZ01059415.2	_	_
ENSDART00000110737	ENSDARG00000075933	13:583649-594094	4.14765	1.27064	-1.70673	-2.35931	0.00105	0.00448059	Down	cox15	K02259	molecular_function:cytochrome-c oxidase activity(GO:0004129);cellular_component:mitochondrial inner membrane(GO:0005743);biological_process:heme a biosynthetic process(GO:0006784);biological_process:heme a biosynthetic process(GO:0006784);biological_process:respiratory chain complex IV assembly(GO:0008535);cellular_component:membrane(GO:0016020);cellular_component:integral component of membrane(G…
ENSDART00000110941	ENSDARG00000087301	9:22316748-22528713	1.86184	5.12009	1.45944	2.55634	0.0047	0.0169267	Ups	crygm2d14	_	molecular_function:molecular_function(GO:0003674);cellular_component:cellular_component(GO:0005575);biological_process:biological_process(GO:0008150)
ENSDART00000111002	ENSDARG00000076239	7:8644407-8715983	5.66386	16.3871	1.53271	20.4532	5e-05	0.000273814	Ups	si:ch211-74f19.2	_	_
ENSDART00000111109	ENSDARG00000073750	9:22316748-22528713	0.509474	2.83708	2.47732	3.34547	0.00055	0.00250382	Ups	crygm2d9	_	_
ENSDART00000111141	ENSDARG00000067701	14:905538-915206	6.54354	1.1088	-2.56107	-6.87954	5e-05	0.000273814	Down	myoz3a	_	molecular_function:actin binding(GO:0003779);cellular_component:actin cytoskeleton(GO:0015629);cellular_component:Z disc(GO:0030018);biological_process:myofibril assembly(GO:0030239);molecular_function:telethonin binding(GO:0031433);molecular_function:FATZ binding(GO:0051373)
ENSDART00000111158	ENSDARG00000051749	25:16866571-16873522	0.266048	0.645324	1.27834	2.07137	0.0145	0.0446691	Ups	tigara	K14634	molecular_function:catalytic activity(GO:0003824);molecular_function:bisphosphoglycerate 2-phosphatase activity(GO:0004083);molecular_function:fructose-2,6-bisphosphate 2-phosphatase activity(GO:0004331);molecular_function:fructose-2,6-bisphosphate 2-phosphatase activity(GO:0004331);cellular_component:nucleus(GO:0005634);cellular_component:nucleus(GO:0005634);cellular_component:cytoplasm(GO:00057…
ENSDART00000111298	ENSDARG00000005590	2:10820998-10848832	7.86448	3.47106	-1.17997	-2.4636	0.0002	0.000995331	Down	mtf2	_	cellular_component:cellular_component(GO:0005575);molecular_function:zinc ion binding(GO:0008270);molecular_function:metal ion binding(GO:0046872)
ENSDART00000111308	ENSDARG00000079217	16:7016923-7202207	2.35503	0.964332	-1.28814	-4.24763	5e-05	0.000273814	Down	bbs9	K19398	biological_process:eye development(GO:0001654);biological_process:neural tube closure(GO:0001843);cellular_component:cilium(GO:0005929);biological_process:gastrulation(GO:0007369);biological_process:retina layer formation(GO:0010842);cellular_component:membrane(GO:0016020);cellular_component:BBSome(GO:0034464);cellular_component:BBSome(GO:0034464);biological_process:pronephros development(GO:0048…
ENSDART00000111368	ENSDARG00000077385	23:8671600-8765023	4.37413	0.950954	-2.20155	-2.04238	0.01615	0.0489956	Down	rgs19	K16449	molecular_function:GTPase activator activity(GO:0005096);cellular_component:cytoplasmic microtubule(GO:0005881);cellular_component:plasma membrane(GO:0005886);cellular_component:cell cortex(GO:0005938);biological_process:regulation of transcription, DNA-templated(GO:0006355);molecular_function:beta-catenin binding(GO:0008013);biological_process:cell death(GO:0008219);biological_process:dorsal/ven…
ENSDART00000111383	ENSDARG00000077775	16:52885413-52892541	0.792444	1.82876	1.20648	3.58079	5e-05	0.000273814	Ups	zgc:193681	_	molecular_function:molecular_function(GO:0003674);cellular_component:cytoplasm(GO:0005737);biological_process:biological_process(GO:0008150)
ENSDART00000111400	ENSDARG00000076950	16:17352454-17392053	0.346385	1.03452	1.57852	4.45884	5e-05	0.000273814	Ups	kel	_	molecular_function:metalloendopeptidase activity(GO:0004222);biological_process:proteolysis(GO:0006508);cellular_component:membrane(GO:0016020);cellular_component:integral component of membrane(GO:0016021)
ENSDART00000111454	ENSDARG00000080019	1:19156230-19195265	3.97912	0.939779	-2.08205	-5.57067	5e-05	0.000273814	Down	UBA6	K10699	cellular_component:cytosol(GO:0005829);biological_process:cellular protein modification process(GO:0006464);biological_process:ubiquitin-dependent protein catabolic process(GO:0006511);molecular_function:small protein activating enzyme activity(GO:0008641);molecular_function:FAT10 activating enzyme activity(GO:0019780);biological_process:protein modification by small protein conjugation(GO:003244…
ENSDART00000111576	ENSDARG00000077215	11:27581615-27670556	2.612	5.2497	1.00708	3.41195	5e-05	0.000273814	Ups	eif4g3a	_	molecular_function:RNA binding(GO:0003723)
ENSDART00000111585	ENSDARG00000087390	3:54859450-54884525	763.816	1646.03	1.10769	9.87637	5e-05	0.000273814	Ups	si:ch211-5k11.12	_	molecular_function:oxygen transporter activity(GO:0005344);molecular_function:iron ion binding(GO:0005506);cellular_component:hemoglobin complex(GO:0005833);biological_process:transport(GO:0006810);biological_process:oxygen transport(GO:0015671);molecular_function:oxygen binding(GO:0019825);molecular_function:heme binding(GO:0020037);molecular_function:metal ion binding(GO:0046872)
ENSDART00000111708	ENSDARG00000077583	7:7232679-7241228	2.53977	1.05329	-1.26979	-6.95277	5e-05	0.000273814	Down	b4gat1	K00741	molecular_function:alpha-1,6-mannosyltransferase activity(GO:0000009);molecular_function:alpha-1,2-mannosyltransferase activity(GO:0000026);molecular_function:mannosyltransferase activity(GO:0000030);molecular_function:alpha-1,3-mannosyltransferase activity(GO:0000033);cellular_component:Golgi membrane(GO:0000139);molecular_function:alpha-1,3-galactosyltransferase activity(GO:0001962);molecular_f…
ENSDART00000111719	ENSDARG00000079034	7:20325725-20330953	0.5701	0.271298	-1.07134	-1.98789	0.00925	0.0303719	Down	si:dkey-19b23.11	_	_
ENSDART00000111746	ENSDARG00000087839	2:353561-356792	0.998444	0.437242	-1.19125	-2.57942	0.0015	0.00615809	Down	si:dkey-33c14.6	_	molecular_function:nucleic acid binding(GO:0003676);molecular_function:metal ion binding(GO:0046872)
ENSDART00000111784	ENSDARG00000079095	21:27240989-27376599	0.469698	1.0959	1.22231	2.53417	0.00055	0.00250382	Ups	rin1a	_	_
ENSDART00000111862	ENSDARG00000078600	25:36754494-36767489	15.9893	5.90003	-1.43831	-10.1251	5e-05	0.000273814	Down	ldlrad3	_	cellular_component:membrane(GO:0016020);cellular_component:integral component of membrane(GO:0016021)
ENSDART00000111952	ENSDARG00000075864	10:19069383-19135185	9.6897	4.57158	-1.08376	-15.0486	5e-05	0.000273814	Down	igsf9a	_	cellular_component:membrane(GO:0016020);cellular_component:integral component of membrane(GO:0016021)
ENSDART00000111961	ENSDARG00000032856	11:25346333-25380967	2.76163	0.694703	-1.99105	-4.15344	5e-05	0.000273814	Down	ccdc120	_	molecular_function:molecular_function(GO:0003674);cellular_component:cellular_component(GO:0005575);biological_process:biological_process(GO:0008150)
ENSDART00000112058	ENSDARG00000075264	9:24050468-24074157	1.42135	0.539013	-1.39888	-3.41353	5e-05	0.000273814	Down	FAM124A	_	_
ENSDART00000112099	ENSDARG00000034430	6:29236927-29302326	3.56881	1.78392	-1.0004	-3.46056	5e-05	0.000273814	Down	zgc:172121	K00547	_
ENSDART00000112116	ENSDARG00000074656	16:29574509-29578811	167.816	20.9014	-3.00521	-35.8055	5e-05	0.000273814	Down	ctss2.1	K01368	molecular_function:cysteine-type endopeptidase activity(GO:0004197);cellular_component:extracellular space(GO:0005615);cellular_component:lysosome(GO:0005764);biological_process:proteolysis(GO:0006508);biological_process:immune response(GO:0006955);molecular_function:peptidase activity(GO:0008233);molecular_function:cysteine-type peptidase activity(GO:0008234);molecular_function:hydrolase activit…
ENSDART00000112156	ENSDARG00000074904	11:7031028-7068553	1.44253	0.662574	-1.12245	-4.23811	5e-05	0.000273814	Down	si:ch211-253b8.5	_	cellular_component:cytoplasm(GO:0005737)
ENSDART00000112210	ENSDARG00000045870	4:3017951-3215254	3.25962	1.40478	-1.21436	-5.27067	5e-05	0.000273814	Down	plekha5	_	_
ENSDART00000112227	ENSDARG00000075352	2:6822832-6893499	1.0156	0.253098	-2.00457	-3.5979	0.0004	0.00187349	Down	CABZ01077605.1	_	_
ENSDART00000112757	ENSDARG00000073709	14:29600951-29634010	0.237411	0.789019	1.73267	2.97393	0.0018	0.00725429	Ups	fam149a	_	_
ENSDART00000112807	ENSDARG00000075163	5:42296536-42304152	1.06347	2.2311	1.06898	2.19804	0.00425	0.0155181	Ups	cxcl20	_	biological_process:positive regulation of leukocyte chemotaxis(GO:0002690);molecular_function:interleukin-8 receptor binding(GO:0005153);cellular_component:extracellular region(GO:0005576);cellular_component:extracellular space(GO:0005615);biological_process:inflammatory response(GO:0006954);biological_process:immune response(GO:0006955);biological_process:immune response(GO:0006955);biological_p…
ENSDART00000112827	ENSDARG00000079703	9:30577169-30581999	0	1.29167	inf	-nan	5e-05	0.000273814	Ups	si:dkey-18p12.4	_	_
ENSDART00000112850	ENSDARG00000079080	25:28464595-28483429	3.58737	1.35499	-1.40464	-3.26778	0.00015	0.000764619	Down	mettl20	_	molecular_function:rRNA (adenine-N6,N6-)-dimethyltransferase activity(GO:0000179);molecular_function:protein C-terminal carboxyl O-methyltransferase activity(GO:0003880);molecular_function:tRNA (guanine-N2-)-methyltransferase activity(GO:0004809);cellular_component:cytoplasm(GO:0005737);cellular_component:mitochondrion(GO:0005739);cellular_component:mitochondrial matrix(GO:0005759);molecular_func…
ENSDART00000112926	ENSDARG00000075694	8:24101258-24113932	1.36001	0.433652	-1.649	-2.28898	0.0063	0.0218277	Down	adora1b	K04265	molecular_function:G-protein coupled adenosine receptor activity(GO:0001609);biological_process:adenosine receptor signaling pathway(GO:0001973);molecular_function:signal transducer activity(GO:0004871);molecular_function:G-protein coupled receptor activity(GO:0004930);cellular_component:plasma membrane(GO:0005886);biological_process:signal transduction(GO:0007165);biological_process:G-protein co…
ENSDART00000112959	ENSDARG00000075263	17:23442947-23449912	4.2675	0.835466	-2.35274	-6.73007	5e-05	0.000273814	Down	ankrd1a	_	cellular_component:sarcomere(GO:0030017);molecular_function:titin binding(GO:0031432);biological_process:muscle cell differentiation(GO:0042692)
ENSDART00000113060	ENSDARG00000075730	13:4089832-4095459	6.83743	24.1979	1.82335	7.85872	5e-05	0.000273814	Ups	dnph1	_	_
ENSDART00000113077	ENSDARG00000079267	5:66075786-66122821	0.842198	0.230377	-1.87017	-3.72615	0.00015	0.000764619	Down	FERMT3 (1 of many)	_	molecular_function:molecular_function(GO:0003674);cellular_component:cellular_component(GO:0005575);biological_process:biological_process(GO:0008150)
ENSDART00000113168	ENSDARG00000079876	22:22104181-22105709	1.03563	0.134871	-2.94086	-2.90601	0.0047	0.0169267	Down	C2CD4C (1 of many)	_	_
ENSDART00000113174	ENSDARG00000076572	9:22316748-22528713	3.0103	13.9525	2.21254	5.37424	5e-05	0.000273814	Ups	crygm2d7	_	_
ENSDART00000113286	ENSDARG00000078050	8:12302260-12365372	1.16219	0.444701	-1.38594	-2.67146	0.00175	0.00707831	Down	phf19	K11486	molecular_function:zinc ion binding(GO:0008270);molecular_function:metal ion binding(GO:0046872)
ENSDART00000113313	ENSDARG00000037363	7:28193600-28278342	9.69879	0.556185	-4.12417	-10.4454	5e-05	0.000273814	Down	st5	K20161	_
ENSDART00000113332	ENSDARG00000073688	7:16554499-16763029	1.77507	0.426214	-2.05823	-5.815	5e-05	0.000273814	Down	nav2a	K19483	_
ENSDART00000113444	ENSDARG00000096140	4:33326257-33629836	0.153076	1.45827	3.25193	3.32144	0.00655	0.0225678	Ups	znf1120	_	_
ENSDART00000113582	ENSDARG00000042791	10:40362816-40396293	3.27655	0.606615	-2.43332	-5.86261	5e-05	0.000273814	Down	git2b	K12487	molecular_function:GTPase activator activity(GO:0005096);cellular_component:cellular_component(GO:0005575)
ENSDART00000113668	ENSDARG00000073944	18:5898775-5942078	5.47887	1.39958	-1.96889	-2.41285	0.00215	0.00848366	Down	si:ch73-386h18.1	_	molecular_function:nucleic acid binding(GO:0003676);molecular_function:DNA binding(GO:0003677);cellular_component:nucleus(GO:0005634);biological_process:regulation of transcription, DNA-templated(GO:0006355);molecular_function:zinc ion binding(GO:0008270);molecular_function:sequence-specific DNA binding(GO:0043565);molecular_function:metal ion binding(GO:0046872)
ENSDART00000113722	ENSDARG00000040295	16:24045711-24048429	0.955134	3.11858	1.70711	2.33858	0.0078	0.0262655	Ups	apoeb	_	molecular_function:beta-amyloid binding(GO:0001540);molecular_function:phospholipid binding(GO:0005543);cellular_component:extracellular region(GO:0005576);biological_process:cholesterol biosynthetic process(GO:0006695);biological_process:cholesterol catabolic process(GO:0006707);biological_process:transport(GO:0006810);biological_process:lipid transport(GO:0006869);molecular_function:lipid bindi…
ENSDART00000113723	ENSDARG00000067797	25:35048602-35067306	1.08004	0.375045	-1.52595	-3.28189	0.00035	0.00165905	Down	spi1a	_	molecular_function:sequence-specific DNA binding RNA polymerase II transcription factor activity(GO:0000981);biological_process:regulation of myeloid leukocyte differentiation(GO:0002761);molecular_function:DNA binding(GO:0003677);molecular_function:sequence-specific DNA binding transcription factor activity(GO:0003700);cellular_component:nucleus(GO:0005634);cellular_component:nucleus(GO:0005634)…
ENSDART00000113724	ENSDARG00000077637	16:9716713-10162147	3.18688	7.14376	1.16454	3.85794	5e-05	0.000273814	Ups	mal2	_	molecular_function:molecular_function(GO:0003674);cellular_component:membrane(GO:0016020);cellular_component:integral component of membrane(GO:0016021);biological_process:transcytosis(GO:0045056);cellular_component:membrane raft(GO:0045121)
ENSDART00000113789	ENSDARG00000076221	3:31973460-31974958	1.21277	13.5527	3.4822	8.51598	5e-05	0.000273814	Ups	zgc:198419	_	molecular_function:iron ion binding(GO:0005506);cellular_component:cytoplasm(GO:0005737);biological_process:iron ion transport(GO:0006826);biological_process:cellular iron ion homeostasis(GO:0006879);biological_process:intracellular sequestering of iron ion(GO:0006880);molecular_function:ferric iron binding(GO:0008199);molecular_function:metal ion binding(GO:0046872)
ENSDART00000113811	ENSDARG00000078024	22:4388690-4560420	0.747799	0.240661	-1.63565	-2.88583	0.0005	0.00229906	Down	CU570881.1	_	_
ENSDART00000113927	ENSDARG00000090286	20:10556859-10560171	16.5574	2.3421	-2.8216	-6.30163	5e-05	0.000273814	Down	serpina1	K04525	molecular_function:serine-type endopeptidase inhibitor activity(GO:0004867);cellular_component:extracellular space(GO:0005615);cellular_component:extracellular space(GO:0005615)
ENSDART00000113993	ENSDARG00000078072	20:8113330-8122933	1.15742	10.8051	3.22273	5.49716	5e-05	0.000273814	Ups	si:ch211-232i5.1	_	_
ENSDART00000114023	ENSDARG00000078674	3:33168703-33172409	40.0819	2.88145	-3.79809	-13.4571	5e-05	0.000273814	Down	hspb9	_	_
ENSDART00000114041	ENSDARG00000006487	7:33074473-33080382	17.8882	85.82	2.2623	5.04847	5e-05	0.000273814	Ups	anp32a	K18646	cellular_component:nucleus(GO:0005634);cellular_component:nucleus(GO:0005634);cellular_component:nucleus(GO:0005634);cellular_component:cytoplasm(GO:0005737);cellular_component:endoplasmic reticulum(GO:0005783);cellular_component:endoplasmic reticulum(GO:0005783);biological_process:nucleosome assembly(GO:0006334);biological_process:nucleocytoplasmic transport(GO:0006913);biological_process:nucleo…
ENSDART00000114062	ENSDARG00000045935	7:15781949-15812712	1.84729	3.74184	1.01834	2.13909	0.006	0.0209232	Ups	immp1l	K09647	molecular_function:serine-type endopeptidase activity(GO:0004252);cellular_component:mitochondrion(GO:0005739);cellular_component:mitochondrial inner membrane(GO:0005743);biological_process:signal peptide processing(GO:0006465);biological_process:proteolysis(GO:0006508);biological_process:protein processing involved in protein targeting to mitochondrion(GO:0006627);biological_process:protein proc…
ENSDART00000114118	ENSDARG00000093851	8:12413745-12631408	0.934541	0.374988	-1.31741	-2.54271	0.0012	0.00505884	Down	si:ch73-332k15.1	_	_
ENSDART00000114169	ENSDARG00000078259	14:23951145-23953812	3.60331	1.68251	-1.09871	-2.80428	0.0006	0.00270717	Down	bnip1a	K08497	cellular_component:endoplasmic reticulum(GO:0005783);cellular_component:membrane(GO:0016020);cellular_component:integral component of membrane(GO:0016021);molecular_function:protein heterodimerization activity(GO:0046982)
ENSDART00000114336	ENSDARG00000079008	16:23896323-23920890	0.423326	0.847467	1.00139	3.61779	5e-05	0.000273814	Ups	FAM189B	_	cellular_component:membrane(GO:0016020);cellular_component:integral component of membrane(GO:0016021)
ENSDART00000114423	ENSDARG00000079291	23:33454622-33517721	1.15551	0.360647	-1.67987	-3.64894	0.0002	0.000995331	Down	rapgef3	K08014	molecular_function:guanyl-nucleotide exchange factor activity(GO:0005085);biological_process:small GTPase mediated signal transduction(GO:0007264);biological_process:intracellular signal transduction(GO:0035556)
ENSDART00000114443	ENSDARG00000076144	3:54489466-54519018	7.07499	1.72546	-2.03574	-10.1158	5e-05	0.000273814	Down	si:ch211-74m13.3	_	molecular_function:integrin binding(GO:0005178);cellular_component:integral component of plasma membrane(GO:0005887);biological_process:cell adhesion(GO:0007155);cellular_component:membrane(GO:0016020);cellular_component:integral component of membrane(GO:0016021);biological_process:single organismal cell-cell adhesion(GO:0016337)
ENSDART00000114465	ENSDARG00000076264	22:4388690-4560420	0.284459	3.89181	3.77415	4.20212	0.0064	0.0221138	Ups	zgc:195170	_	molecular_function:purinergic nucleotide receptor activity(GO:0001614);molecular_function:purinergic nucleotide receptor activity(GO:0001614);molecular_function:extracellular ATP-gated cation channel activity(GO:0004931);molecular_function:extracellular ATP-gated cation channel activity(GO:0004931);cellular_component:integral component of nuclear inner membrane(GO:0005639);cellular_component:inte…
ENSDART00000114549	ENSDARG00000076126	19:47988580-47994969	123.795	3.47101	-5.15645	-24.176	5e-05	0.000273814	Down	ACTC1 (1 of many)	K12314	_
ENSDART00000114676	ENSDARG00000029473	8:25276020-25282663	2.19863	4.60411	1.06632	2.10568	0.0142	0.0439534	Ups	gstm.2	K00799	molecular_function:glutathione transferase activity(GO:0004364);cellular_component:cellular_component(GO:0005575);biological_process:metabolic process(GO:0008152)
ENSDART00000114682	ENSDARG00000078653	2:53213557-53248195	3.18814	1.1736	-1.44177	-3.92335	5e-05	0.000273814	Down	ralbp1	K08773	molecular_function:GTPase activator activity(GO:0005096);biological_process:endocytosis(GO:0006897);biological_process:signal transduction(GO:0007165);biological_process:small GTPase mediated signal transduction(GO:0007264);cellular_component:membrane(GO:0016020);molecular_function:ATPase activity(GO:0016887);molecular_function:Ral GTPase binding(GO:0017160)
ENSDART00000114691	ENSDARG00000074326	17:4167567-4207427	1.42274	0.434165	-1.71236	-2.49427	0.0062	0.0215239	Down	mcm8	K10737	molecular_function:nucleotide binding(GO:0000166);molecular_function:DNA binding(GO:0003677);molecular_function:ATP binding(GO:0005524);biological_process:DNA replication(GO:0006260)
ENSDART00000114767	ENSDARG00000076129	25:34619243-34619618	0.984972	0	-inf	-nan	0.0078	0.0262655	Down	si:ch73-36p18.3	K11252	_
ENSDART00000114866	ENSDARG00000078425	12:46944389-47087271	3.05062	1.45045	-1.0726	-3.31796	0.0001	0.0005238	Down	oat	_	molecular_function:catalytic activity(GO:0003824);molecular_function:ornithine-oxo-acid transaminase activity(GO:0004587);cellular_component:cytoplasm(GO:0005737);molecular_function:transaminase activity(GO:0008483);biological_process:arginine catabolic process to proline via ornithine(GO:0010121);biological_process:arginine catabolic process to glutamate(GO:0019544);molecular_function:pyridoxal …
ENSDART00000114928	ENSDARG00000079302	2:31779985-31784434	14.473	34.4056	1.24928	15.3279	5e-05	0.000273814	Ups	and2	_	biological_process:fin development(GO:0033333);biological_process:cartilage development(GO:0051216)
ENSDART00000114936	ENSDARG00000076639	15:19417960-19508265	0.211366	0.673616	1.67219	2.59874	0.00305	0.0115613	Ups	esamb	K06787	cellular_component:membrane(GO:0016020);cellular_component:integral component of membrane(GO:0016021)
ENSDART00000114943	ENSDARG00000087164	9:22316748-22528713	2.92967	9.18325	1.64827	3.3404	5e-05	0.000273814	Ups	crygm2d4	_	molecular_function:molecular_function(GO:0003674);cellular_component:cellular_component(GO:0005575);biological_process:biological_process(GO:0008150)
ENSDART00000114977	ENSDARG00000077090	4:14637553-14643624	0.203084	0.594763	1.55024	2.36944	0.0092	0.0302397	Ups	si:ch211-127b11.1	_	cellular_component:semaphorin receptor complex(GO:0002116);cellular_component:integral component of plasma membrane(GO:0005887);biological_process:negative regulation of cell adhesion(GO:0007162);biological_process:regulation of cell shape(GO:0008360);cellular_component:membrane(GO:0016020);cellular_component:integral component of membrane(GO:0016021);molecular_function:semaphorin receptor activi…
ENSDART00000115001	ENSDARG00000077083	25:1469192-1477753	0.989576	0.489657	-1.01504	-1.93503	0.01265	0.0398581	Down	avpr1aa	K04226	biological_process:regulation of systemic arterial blood pressure by vasopressin(GO:0001992);molecular_function:signal transducer activity(GO:0004871);molecular_function:G-protein coupled receptor activity(GO:0004930);molecular_function:vasopressin receptor activity(GO:0005000);molecular_function:vasopressin receptor activity(GO:0005000);cellular_component:integral component of plasma membrane(GO…
ENSDART00000115045	ENSDARG00000087318	7:8127066-8135474	0.915662	5.4715	2.57905	4.47474	5e-05	0.000273814	Ups	zgc:174688	_	molecular_function:molecular_function(GO:0003674);cellular_component:cellular_component(GO:0005575);biological_process:biological_process(GO:0008150)
ENSDART00000115121	ENSDARG00000076321	9:48600010-48673250	11.9002	50.8329	2.09477	37.7883	5e-05	0.000273814	Ups	col28a2a	_	_
ENSDART00000115161	ENSDARG00000076768	23:41015753-41107312	1.71987	0.617867	-1.47693	-5.98384	5e-05	0.000273814	Down	REPS2	K20068	_
ENSDART00000115329	ENSDARG00000013542	20:13885546-13978360	2.45886	5.02885	1.03224	3.58002	5e-05	0.000273814	Ups	lpgat1	K13514	biological_process:metabolic process(GO:0008152);cellular_component:membrane(GO:0016020);cellular_component:integral component of membrane(GO:0016021);molecular_function:transferase activity, transferring acyl groups(GO:0016746)
ENSDART00000115356	ENSDARG00000002690	11:24578050-24580021	17.7674	1.73998	-3.35209	-4.98513	5e-05	0.000273814	Down	rabif	K19952	molecular_function:guanyl-nucleotide exchange factor activity(GO:0005085);biological_process:small GTPase mediated signal transduction(GO:0007264)
ENSDART00000115408	ENSDARG00000037503	14:12085891-12180608	0.759137	0.291784	-1.37946	-2.22197	0.0051	0.0181311	Down	thoc2	K12879	cellular_component:THO complex part of transcription export complex(GO:0000445);molecular_function:mRNA binding(GO:0003729);biological_process:mRNA export from nucleus(GO:0006406)
ENSDART00000119138	ENSDARG00000083738	20:10502233-10502818	3.41116	0	-inf	-nan	0.00375	0.0138923	Down	SCARNA13	_	_
ENSDART00000121743	ENSDARG00000091640	4:5823740-5826078	4.58912	12.0491	1.39264	6.14823	5e-05	0.000273814	Ups	si:ch73-352p4.5	_	biological_process:DNA damage checkpoint(GO:0000077);cellular_component:nucleus(GO:0005634);biological_process:cellular response to ionizing radiation(GO:0071479)
ENSDART00000121823	ENSDARG00000025034	1:7731871-7744650	0.1223	0.972166	2.99078	3.40894	0.00175	0.00707831	Ups	syngr3b	_	molecular_function:molecular_function(GO:0003674);biological_process:biological_process(GO:0008150);cellular_component:membrane(GO:0016020);cellular_component:integral component of membrane(GO:0016021);cellular_component:synaptic vesicle membrane(GO:0030672);cellular_component:neuromuscular junction(GO:0031594)
ENSDART00000121936	ENSDARG00000087120	4:5839658-5854481	1.13078	2.86984	1.34365	2.34977	0.004	0.014715	Ups	slc5a8	_	molecular_function:transporter activity(GO:0005215);biological_process:transport(GO:0006810);cellular_component:membrane(GO:0016020);cellular_component:integral component of membrane(GO:0016021);biological_process:transmembrane transport(GO:0055085)
ENSDART00000121952	ENSDARG00000087897	13:7420830-7435398	4.71705	9.59719	1.02473	3.63071	5e-05	0.000273814	Ups	h2afy2	K11251	cellular_component:nucleosome(GO:0000786);cellular_component:nuclear chromatin(GO:0000790);molecular_function:DNA binding(GO:0003677);cellular_component:nucleus(GO:0005634);cellular_component:chromosome(GO:0005694);biological_process:nucleosome assembly(GO:0006334);biological_process:chromatin silencing(GO:0006342);biological_process:brain development(GO:0007420);biological_process:covalent chrom…
ENSDART00000122031	ENSDARG00000087093	3:27511235-27532605	31.6528	4.22859	-2.90408	-3.4416	0.0001	0.0005238	Down	si:ch211-157c3.4	_	cellular_component:membrane(GO:0016020);cellular_component:integral component of membrane(GO:0016021)
ENSDART00000122128	ENSDARG00000040192	17:45412593-45419709	2.19445	4.72051	1.10508	2.88582	0.00035	0.00165905	Ups	nenf	_	biological_process:biological_process(GO:0008150);cellular_component:endomembrane system(GO:0012505);cellular_component:membrane(GO:0016020)
ENSDART00000122366	ENSDARG00000087749	17:26459273-26519537	0.785812	1.90379	1.27662	5.57003	5e-05	0.000273814	Ups	ccser2a	_	_
ENSDART00000122414	ENSDARG00000042698	20:23948279-23953074	0.220288	0.741017	1.75012	2.3879	0.00885	0.0292234	Ups	si:dkey-15j16.6	_	molecular_function:receptor activity(GO:0004872);molecular_function:receptor binding(GO:0005102);cellular_component:integral component of plasma membrane(GO:0005887);cellular_component:cell-cell adherens junction(GO:0005913);biological_process:homophilic cell adhesion via plasma membrane adhesion molecules(GO:0007156);biological_process:heterophilic cell-cell adhesion via plasma membrane cell adh…
ENSDART00000122422	ENSDARG00000087102	24:38761121-38769920	0.446016	2.9078	2.70476	3.76576	0.0005	0.00229906	Ups	si:ch1073-164k15.3	_	_
ENSDART00000122520	ENSDARG00000032919	4:15491463-15604794	0.196317	12.2518	5.96367	4.77692	0.0048	0.0172379	Ups	chchd3a	K17563	cellular_component:mitochondrion(GO:0005739);cellular_component:mitochondrial inner membrane(GO:0005743);cellular_component:membrane(GO:0016020)
ENSDART00000122536	ENSDARG00000090386	15:28854010-28869384	1.88655	4.7339	1.32728	1.9295	0.00805	0.0269805	Ups	cd3eap	_	_
ENSDART00000122558	ENSDARG00000089235	9:12625609-12653528	1.51225	0.655969	-1.205	-3.76845	5e-05	0.000273814	Down	tspearb	_	_
ENSDART00000122559	ENSDARG00000020218	25:35648013-35667844	9.29536	3.05747	-1.60417	-2.75095	0.0001	0.0005238	Down	amfr	K10636	biological_process:protein polyubiquitination(GO:0000209);cellular_component:Hrd1p ubiquitin ligase ERAD-M complex(GO:0000838);molecular_function:zinc ion binding(GO:0008270);cellular_component:membrane(GO:0016020);cellular_component:integral component of membrane(GO:0016021);biological_process:ER-associated ubiquitin-dependent protein catabolic process(GO:0030433);biological_process:endoplasmic …
ENSDART00000122815	ENSDARG00000000729	19:7095393-7114745	1.73373	0.503639	-1.78342	-3.62542	0.0001	0.0005238	Down	daxx	K02308	molecular_function:transcription corepressor activity(GO:0003714);cellular_component:nucleus(GO:0005634);cellular_component:nucleus(GO:0005634);cellular_component:PML body(GO:0016605);biological_process:negative regulation of transcription, DNA-templated(GO:0045892)
ENSDART00000122859	ENSDARG00000053656	19:44288546-44306974	1.77258	5.23301	1.56179	3.0715	0.00035	0.00165905	Ups	lypla2	_	biological_process:protein depalmitoylation(GO:0002084);cellular_component:cytoplasm(GO:0005737);molecular_function:palmitoyl-(protein) hydrolase activity(GO:0008474);molecular_function:hydrolase activity(GO:0016787);molecular_function:carboxylic ester hydrolase activity(GO:0052689)
ENSDART00000122892	ENSDARG00000089177	20:5227892-5246623	1.38517	0.53005	-1.38586	-3.08332	0.00045	0.00208841	Down	cyp46a1.3	K07440	molecular_function:monooxygenase activity(GO:0004497);molecular_function:iron ion binding(GO:0005506);cellular_component:membrane(GO:0016020);cellular_component:integral component of membrane(GO:0016021);molecular_function:oxidoreductase activity(GO:0016491);molecular_function:oxidoreductase activity, acting on paired donors, with incorporation or reduction of molecular oxygen(GO:0016705);molecul…
ENSDART00000122898	ENSDARG00000087887	4:73251703-73485393	21.4042	10.3165	-1.05294	-11.3447	5e-05	0.000273814	Down	PHF21B	_	_
ENSDART00000123004	ENSDARG00000090185	25:26311375-26315051	0	0.569225	inf	-nan	5e-05	0.000273814	Ups	si:dkeyp-73b11.8	_	molecular_function:serine-type endopeptidase inhibitor activity(GO:0004867);cellular_component:membrane(GO:0016020);cellular_component:integral component of membrane(GO:0016021)
ENSDART00000123040	ENSDARG00000012801	2:48265329-48317277	0.721373	1.5095	1.06525	3.87583	5e-05	0.000273814	Ups	pfkpb	K00850	molecular_function:nucleotide binding(GO:0000166);molecular_function:catalytic activity(GO:0003824);molecular_function:6-phosphofructokinase activity(GO:0003872);molecular_function:ATP binding(GO:0005524);cellular_component:cytoplasm(GO:0005737);biological_process:fructose 6-phosphate metabolic process(GO:0006002);biological_process:glycolytic process(GO:0006096);biological_process:metabolic proc…
ENSDART00000123131	ENSDARG00000089307	10:8697716-8698776	2.84932	6.11177	1.10097	3.71427	5e-05	0.000273814	Ups	pmaip1	K10131	biological_process:release of cytochrome c from mitochondria(GO:0001836);cellular_component:cellular_component(GO:0005575);biological_process:apoptotic process(GO:0006915);biological_process:activation of cysteine-type endopeptidase activity involved in apoptotic process(GO:0006919);biological_process:cellular response to DNA damage stimulus(GO:0006974);biological_process:regulation of mitotic nu…
ENSDART00000123458	ENSDARG00000044525	22:980939-1005533	1.04745	0.330212	-1.66542	-4.39032	5e-05	0.000273814	Down	pparda	_	molecular_function:DNA binding(GO:0003677);molecular_function:sequence-specific DNA binding transcription factor activity(GO:0003700);molecular_function:steroid hormone receptor activity(GO:0003707);molecular_function:ligand-activated sequence-specific DNA binding RNA polymerase II transcription factor activity(GO:0004879);cellular_component:nucleus(GO:0005634);biological_process:transcription, D…
ENSDART00000123513	ENSDARG00000088141	3:58785149-58790211	0	1.38038	inf	-nan	5e-05	0.000273814	Ups	CU570684.4	_	_
ENSDART00000123612	ENSDARG00000055172	3:25023529-25034641	0.227872	0.853758	1.90561	3.05953	0.00285	0.0108785	Ups	si:ch211-256m1.8	K13051	molecular_function:nucleotide binding(GO:0000166);molecular_function:catalytic activity(GO:0003824);molecular_function:aminoacyl-tRNA ligase activity(GO:0004812);molecular_function:ATP binding(GO:0005524);biological_process:tRNA aminoacylation for protein translation(GO:0006418);molecular_function:transferase activity, transferring acyl groups(GO:0016746);molecular_function:hydrolase activity(GO:…
ENSDART00000123700	ENSDARG00000024829	2:35526960-35584559	12.6838	50.4808	1.99275	10.519	5e-05	0.000273814	Ups	tnw	_	cellular_component:proteinaceous extracellular matrix(GO:0005578)
ENSDART00000123832	ENSDARG00000007576	14:47316813-47333038	31.6172	83.4402	1.40003	17.9197	5e-05	0.000273814	Ups	crybb1l1	_	_
ENSDART00000124152	ENSDARG00000039435	13:23597702-23626276	0.769805	1.84337	1.25978	1.96403	0.0116	0.0370132	Ups	rgs17	K16449	molecular_function:GTPase activator activity(GO:0005096);cellular_component:cytoplasmic microtubule(GO:0005881);cellular_component:plasma membrane(GO:0005886);cellular_component:cell cortex(GO:0005938);biological_process:regulation of transcription, DNA-templated(GO:0006355);molecular_function:beta-catenin binding(GO:0008013);biological_process:cell death(GO:0008219);biological_process:dorsal/ven…
ENSDART00000124272	ENSDARG00000088687	9:22316748-22528713	4.8014	19.7795	2.04248	5.85475	5e-05	0.000273814	Ups	crygm2d17	_	molecular_function:molecular_function(GO:0003674);cellular_component:cellular_component(GO:0005575);biological_process:biological_process(GO:0008150)
ENSDART00000124308	ENSDARG00000090847	22:6541133-6674702	8.03141	2.76008	-1.54095	-11.0135	5e-05	0.000273814	Down	si:ch211-209l18.4	_	cellular_component:membrane(GO:0016020);cellular_component:integral component of membrane(GO:0016021)
ENSDART00000124313	ENSDARG00000031046	8:10865619-10894501	0.752409	3.08558	2.03595	5.25472	5e-05	0.000273814	Ups	nr1h5	_	molecular_function:DNA binding(GO:0003677);molecular_function:sequence-specific DNA binding transcription factor activity(GO:0003700);molecular_function:steroid hormone receptor activity(GO:0003707);cellular_component:nucleus(GO:0005634);biological_process:transcription, DNA-templated(GO:0006351);biological_process:regulation of transcription, DNA-templated(GO:0006355);molecular_function:zinc ion…
ENSDART00000124331	ENSDARG00000090108	25:36556031-36566557	0.641267	0.313013	-1.0347	-2.33585	0.00475	0.0170781	Down	si:ch1073-174d20.1	_	cellular_component:cytoplasm(GO:0005737)
ENSDART00000124335	ENSDARG00000089921	23:19749436-19760320	22.509	10.8029	-1.05908	-5.92031	5e-05	0.000273814	Down	smim4	_	_
ENSDART00000124432	ENSDARG00000091209	10:36706162-36738764	0.869293	4.86959	2.48589	5.17092	5e-05	0.000273814	Ups	ucp3	_	biological_process:transport(GO:0006810);biological_process:mitochondrial transport(GO:0006839);cellular_component:membrane(GO:0016020);cellular_component:integral component of membrane(GO:0016021);cellular_component:mitochondrial membrane(GO:0031966)
ENSDART00000124451	ENSDARG00000105306	4:44506971-45111228	3.02454	1.02988	-1.55424	-2.88883	0.00045	0.00208841	Down	si:dkeyp-104f11.6	_	_
ENSDART00000124453	ENSDARG00000055527	12:13080236-13138615	1.6817	0.356362	-2.23851	-2.59998	0.00625	0.0216786	Down	cmn	_	cellular_component:extracellular matrix(GO:0031012)
ENSDART00000124516	ENSDARG00000006220	9:9998613-10032338	0.704977	2.48644	1.81844	2.27895	0.00765	0.0258352	Ups	ugt1ab	_	biological_process:metabolic process(GO:0008152);molecular_function:glucuronosyltransferase activity(GO:0015020);molecular_function:glucuronosyltransferase activity(GO:0015020);cellular_component:membrane(GO:0016020);cellular_component:integral component of membrane(GO:0016021);molecular_function:transferase activity(GO:0016740);molecular_function:transferase activity, transferring glycosyl group…
ENSDART00000124523	ENSDARG00000088490	20:47249571-47275685	0.708203	0	-inf	-nan	5e-05	0.000273814	Down	si:dkeyp-104f11.1	_	_
ENSDART00000124580	ENSDARG00000057125	24:26519586-26594114	3.54034	1.16909	-1.5985	-6.23119	5e-05	0.000273814	Down	pld1b	K01115	molecular_function:catalytic activity(GO:0003824);molecular_function:phospholipase D activity(GO:0004630);cellular_component:Golgi apparatus(GO:0005794);biological_process:phosphatidic acid biosynthetic process(GO:0006654);biological_process:regulation of microvillus assembly(GO:0032534);molecular_function:phosphatidylinositol binding(GO:0035091);biological_process:inositol lipid-mediated signali…
ENSDART00000124600	ENSDARG00000086658	9:22316748-22528713	1.62107	6.617	2.02923	2.65212	0.0055	0.0194025	Ups	crygm2d21	_	_
ENSDART00000124661	ENSDARG00000071021	17:23661061-23689323	1.01918	2.66876	1.38876	5.49557	5e-05	0.000273814	Ups	papss2a	K13811	biological_process:sulfate assimilation(GO:0000103);biological_process:sulfate assimilation(GO:0000103);molecular_function:adenylylsulfate kinase activity(GO:0004020);molecular_function:adenylylsulfate kinase activity(GO:0004020);molecular_function:sulfate adenylyltransferase (ATP) activity(GO:0004781);molecular_function:ATP binding(GO:0005524);cellular_component:cellular_component(GO:0005575);bi…
ENSDART00000124663	ENSDARG00000090912	17:43031044-43041345	5.4406	0.465191	-3.54787	-3.34679	0.00845	0.0281321	Down	npc2	K13443	cellular_component:extracellular region(GO:0005576);cellular_component:endoplasmic reticulum(GO:0005783);biological_process:lipid metabolic process(GO:0006629);biological_process:steroid metabolic process(GO:0008202);biological_process:cholesterol metabolic process(GO:0008203)
ENSDART00000124698	ENSDARG00000002710	22:36704302-36721742	10.0204	129.302	3.68973	27.0609	5e-05	0.000273814	Ups	ncl	K11294	molecular_function:nucleotide binding(GO:0000166);biological_process:heart looping(GO:0001947);molecular_function:nucleic acid binding(GO:0003676);biological_process:rRNA processing(GO:0006364);biological_process:rRNA transcription(GO:0009303)
ENSDART00000125012	ENSDARG00000093405	3:32827710-32834164	4.24937	12.1859	1.5199	11.685	5e-05	0.000273814	Ups	casp6	K04396	molecular_function:cysteine-type endopeptidase activity(GO:0004197);cellular_component:cytoplasm(GO:0005737);biological_process:proteolysis(GO:0006508);molecular_function:peptidase activity(GO:0008233);molecular_function:cysteine-type peptidase activity(GO:0008234);molecular_function:hydrolase activity(GO:0016787);molecular_function:cysteine-type endopeptidase activity involved in apoptotic proce…
ENSDART00000125013	ENSDARG00000011876	1:35933515-35970328	4.30829	11.95	1.47183	2.37833	0.00665	0.0228532	Ups	ednraa	_	molecular_function:signal transducer activity(GO:0004871);molecular_function:G-protein coupled receptor activity(GO:0004930);molecular_function:endothelin receptor activity(GO:0004962);biological_process:signal transduction(GO:0007165);biological_process:G-protein coupled receptor signaling pathway(GO:0007186);biological_process:regulation of blood pressure(GO:0008217);biological_process:regulati…
ENSDART00000125063	ENSDARG00000025808	1:53249351-53259096	2.20102	0.94263	-1.22341	-3.52647	5e-05	0.000273814	Down	taf5l	K03130	_
ENSDART00000125092	ENSDARG00000089475	3:54859450-54884525	46.2789	104.022	1.16847	7.94929	5e-05	0.000273814	Ups	hbae1	K13826	_
ENSDART00000125097	ENSDARG00000086703	23:31993313-32005545	1.0622	0.371973	-1.51379	-3.87941	5e-05	0.000273814	Down	si:dkey-126g1.7	_	molecular_function:nucleotide binding(GO:0000166);molecular_function:ATP binding(GO:0005524)
ENSDART00000125168	ENSDARG00000011146	19:44453922-44470008	2.74022	9.86967	1.84871	2.49407	0.00055	0.00250382	Ups	uqcrb	K00417	biological_process:angiogenesis(GO:0001525);cellular_component:mitochondrion(GO:0005739);cellular_component:mitochondrial inner membrane(GO:0005743);cellular_component:mitochondrial respiratory chain complex III(GO:0005750);cellular_component:mitochondrial respiratory chain complex III(GO:0005750);biological_process:mitochondrial electron transport, ubiquinol to cytochrome c(GO:0006122);biologica…
ENSDART00000125254	ENSDARG00000087094	14:33632831-33641230	6.9835	2.78689	-1.32529	-2.48177	0.00475	0.0170781	Down	foxa	_	molecular_function:sequence-specific DNA binding RNA polymerase II transcription factor activity(GO:0000981);molecular_function:DNA binding(GO:0003677);molecular_function:sequence-specific DNA binding transcription factor activity(GO:0003700);cellular_component:nucleus(GO:0005634);biological_process:regulation of transcription, DNA-templated(GO:0006355);molecular_function:sequence-specific DNA bi…
ENSDART00000125287	ENSDARG00000088452	16:28775944-28819448	0.550423	1.80352	1.7122	1.95905	0.0133	0.0415917	Ups	si:dkey-24i24.3	_	_
ENSDART00000125579	ENSDARG00000027738	19:42462287-42483850	2.28815	6.52986	1.51287	3.00032	0.0001	0.0005238	Ups	si:ch211-13c6.2	_	_
ENSDART00000125674	ENSDARG00000101318	14:2200810-2349164	0.446979	0.918288	1.03874	2.48221	0.00025	0.0012226	Ups	pcdh2ab9	K16493	molecular_function:calcium ion binding(GO:0005509);cellular_component:plasma membrane(GO:0005886);biological_process:cell adhesion(GO:0007155);biological_process:homophilic cell adhesion via plasma membrane adhesion molecules(GO:0007156);cellular_component:membrane(GO:0016020);cellular_component:integral component of membrane(GO:0016021)
ENSDART00000125728	ENSDARG00000086418	17:8134382-8148614	1.88386	0.6302	-1.57981	-3.29456	5e-05	0.000273814	Down	si:ch211-236p5.3	_	molecular_function:nucleotide binding(GO:0000166);molecular_function:ATP binding(GO:0005524)
ENSDART00000125754	ENSDARG00000086947	25:13060659-13092173	3.61755	1.60098	-1.17606	-3.45461	0.0001	0.0005238	Down	si:ch211-147m6.1	_	_
ENSDART00000125767	ENSDARG00000069261	4:25961173-26027343	9.172	4.46711	-1.0379	-5.60172	5e-05	0.000273814	Down	metap2a	K01265	molecular_function:aminopeptidase activity(GO:0004177);cellular_component:cytoplasm(GO:0005737);biological_process:proteolysis(GO:0006508);molecular_function:peptidase activity(GO:0008233);molecular_function:metalloexopeptidase activity(GO:0008235);molecular_function:hydrolase activity(GO:0016787);molecular_function:metal ion binding(GO:0046872);molecular_function:metalloaminopeptidase activity(G…
ENSDART00000125813	ENSDARG00000057148	13:16130119-16147839	2.39349	1.01594	-1.2363	-3.14612	5e-05	0.000273814	Down	si:dkey-48n15.2	_	_
ENSDART00000125988	ENSDARG00000036774	1:40498798-40587799	2.95607	1.26484	-1.22472	-3.30082	5e-05	0.000273814	Down	rgs12b	_	molecular_function:receptor signaling protein activity(GO:0005057);molecular_function:GTPase activator activity(GO:0005096);cellular_component:cytoplasm(GO:0005737);cellular_component:plasma membrane(GO:0005886);biological_process:signal transduction(GO:0007165);molecular_function:GTPase regulator activity(GO:0030695)
ENSDART00000125991	ENSDARG00000087299	22:36578851-36665528	1.66445	0.771962	-1.10844	-2.62299	0.0014	0.00578668	Down	armc9	_	_
ENSDART00000126135	ENSDARG00000018534	2:33352729-33472056	9.11416	2.87902	-1.66253	-7.16283	5e-05	0.000273814	Down	slc6a9	K05038	molecular_function:sodium:amino acid symporter activity(GO:0005283);molecular_function:neurotransmitter:sodium symporter activity(GO:0005328);cellular_component:integral component of plasma membrane(GO:0005887);cellular_component:integral component of plasma membrane(GO:0005887);biological_process:transport(GO:0006810);biological_process:neurotransmitter transport(GO:0006836);biological_process:l…
ENSDART00000126215	ENSDARG00000086842	9:52812378-52951072	26.5529	74.0209	1.47906	5.50772	5e-05	0.000273814	Ups	dap1b	_	_
ENSDART00000126220	ENSDARG00000091086	8:24777392-24788908	6.84856	1.87016	-1.87264	-13.3641	5e-05	0.000273814	Down	ALX3	K09323	_
ENSDART00000126314	ENSDARG00000006467	9:54117502-54126174	1.14957	0.256503	-2.16405	-5.30451	5e-05	0.000273814	Down	pcdh8	K16499	molecular_function:calcium ion binding(GO:0005509);cellular_component:plasma membrane(GO:0005886);biological_process:cell adhesion(GO:0007155);biological_process:homophilic cell adhesion via plasma membrane adhesion molecules(GO:0007156);cellular_component:membrane(GO:0016020);cellular_component:integral component of membrane(GO:0016021)
ENSDART00000126315	ENSDARG00000019746	12:3019706-3042662	3.36237	8.6673	1.36611	7.58427	5e-05	0.000273814	Ups	rfng	K05948	cellular_component:Golgi apparatus(GO:0005794);biological_process:Notch signaling pathway(GO:0007219);biological_process:multicellular organismal development(GO:0007275);biological_process:pattern specification process(GO:0007389);biological_process:nervous system development(GO:0007399);cellular_component:membrane(GO:0016020);cellular_component:integral component of membrane(GO:0016021);molecula…
ENSDART00000126326	ENSDARG00000051754	25:35540132-35577507	2.0825	0.833648	-1.32081	-2.29478	0.0023	0.00899296	Down	rpgrip1l	K16550	biological_process:establishment of planar polarity(GO:0001736);biological_process:embryonic pattern specification(GO:0009880);biological_process:single-organism developmental process(GO:0044767)
ENSDART00000126372	ENSDARG00000053810	2:38042846-38071766	4.7921	12.0196	1.32666	4.2641	5e-05	0.000273814	Ups	hnrnpc	_	molecular_function:nucleotide binding(GO:0000166);molecular_function:nucleic acid binding(GO:0003676);cellular_component:nucleus(GO:0005634);cellular_component:virion(GO:0019012);cellular_component:viral nucleocapsid(GO:0019013);cellular_component:ribonucleoprotein complex(GO:0030529);molecular_function:poly(A) RNA binding(GO:0044822)
ENSDART00000126457	ENSDARG00000086296	4:44084821-44105274	3.20984	0.29469	-3.44523	-6.91328	5e-05	0.000273814	Down	si:ch211-209p16.1	_	molecular_function:RNA polymerase II core promoter proximal region sequence-specific DNA binding(GO:0000978);molecular_function:nucleic acid binding(GO:0003676);cellular_component:nucleus(GO:0005634);biological_process:regulation of transcription, DNA-templated(GO:0006355);molecular_function:metal ion binding(GO:0046872)
ENSDART00000126503	ENSDARG00000077719	11:12715660-12717178	0.938649	0	-inf	-nan	5e-05	0.000273814	Down	BX004876.1	_	_
ENSDART00000126716	ENSDARG00000033539	20:25719023-25746060	19.3138	7.49613	-1.36541	-2.46552	5e-05	0.000273814	Down	paics	K01587	molecular_function:phosphoribosylaminoimidazole carboxylase activity(GO:0004638);molecular_function:phosphoribosylaminoimidazolesuccinocarboxamide synthase activity(GO:0004639);molecular_function:phosphoribosylaminoimidazolesuccinocarboxamide synthase activity(GO:0004639);molecular_function:ATP binding(GO:0005524);cellular_component:cytosol(GO:0005829);biological_process:purine nucleotide biosynt…
ENSDART00000126823	ENSDARG00000015566	17:36991994-37107374	1.69517	0.752	-1.17262	-2.69213	0.0012	0.00505884	Down	dnmt3ab	K17398	biological_process:DNA methylation(GO:0006306);molecular_function:methyltransferase activity(GO:0008168);molecular_function:DNA-methyltransferase activity(GO:0009008);biological_process:regulation of gene expression(GO:0010468);molecular_function:transferase activity(GO:0016740);biological_process:methylation(GO:0032259)
ENSDART00000126840	ENSDARG00000079949	7:1415255-1483171	0.19812	1.32938	2.7463	3.45282	0.00085	0.00371048	Ups	supt16h	_	biological_process:transcription elongation from RNA polymerase II promoter(GO:0006368);molecular_function:nucleosome binding(GO:0031491);biological_process:positive regulation of transcription elongation from RNA polymerase II promoter(GO:0032968);biological_process:DNA replication-independent nucleosome organization(GO:0034724);cellular_component:FACT complex(GO:0035101);molecular_function:hist…
ENSDART00000127003	ENSDARG00000060001	12:956854-964213	5.88325	2.71584	-1.11521	-3.15105	0.0001	0.0005238	Down	mettl9	_	cellular_component:cellular_component(GO:0005575)
ENSDART00000127085	ENSDARG00000090844	9:53434189-53459369	0.729344	0.22961	-1.66741	-2.64667	0.0072	0.0245081	Down	CABZ01054965.1	_	_
ENSDART00000127136	ENSDARG00000086104	2:42533042-42547178	1.60956	4.22924	1.39373	7.96009	5e-05	0.000273814	Ups	slco5a2	_	molecular_function:transporter activity(GO:0005215);cellular_component:integral component of plasma membrane(GO:0005887);biological_process:transport(GO:0006810);biological_process:ion transport(GO:0006811);molecular_function:sodium-independent organic anion transmembrane transporter activity(GO:0015347);cellular_component:membrane(GO:0016020);cellular_component:integral component of membrane(GO:…
ENSDART00000127153	ENSDARG00000062612	8:4460112-4517622	9.57333	1.79455	-2.4154	-12.0514	5e-05	0.000273814	Down	dhx37	K14780	molecular_function:nucleotide binding(GO:0000166);molecular_function:nucleic acid binding(GO:0003676);molecular_function:ATP-dependent RNA helicase activity(GO:0004004);molecular_function:helicase activity(GO:0004386);molecular_function:ATP binding(GO:0005524);cellular_component:nucleolus(GO:0005730);cellular_component:cytoplasm(GO:0005737);molecular_function:ATP-dependent helicase activity(GO:00…
ENSDART00000127325	ENSDARG00000089342	1:52119177-52124558	2.15056	6.09643	1.50325	5.83597	5e-05	0.000273814	Ups	wu:fc75a09	_	_
ENSDART00000127436	ENSDARG00000004141	15:15479600-15501508	4.41123	9.12197	1.04816	5.82145	5e-05	0.000273814	Ups	zgc:92630	_	cellular_component:cellular_component(GO:0005575)
ENSDART00000127467	ENSDARG00000013317	7:22552670-22581032	4.51808	1.80823	-1.32113	-2.70981	0.0009	0.00391406	Down	pygmb	_	molecular_function:phosphorylase activity(GO:0004645);cellular_component:cytoplasm(GO:0005737);biological_process:carbohydrate metabolic process(GO:0005975);biological_process:glycogen catabolic process(GO:0005980);molecular_function:glycogen phosphorylase activity(GO:0008184);molecular_function:glycogen phosphorylase activity(GO:0008184);molecular_function:transferase activity(GO:0016740);molecu…
ENSDART00000127578	ENSDARG00000024416	19:2213209-2222343	2.08068	0.649811	-1.67897	-4.48404	5e-05	0.000273814	Down	twistnb	K03004	molecular_function:RNA polymerase I activity(GO:0001054);molecular_function:DNA-directed RNA polymerase activity(GO:0003899);cellular_component:nucleus(GO:0005634);cellular_component:DNA-directed RNA polymerase I complex(GO:0005736);biological_process:transcription, DNA-templated(GO:0006351)
ENSDART00000127614	ENSDARG00000041381	18:15601114-15642344	1.49312	0.260595	-2.51845	-2.05106	0.01485	0.0455764	Down	arntl2	_	molecular_function:sequence-specific DNA binding transcription factor activity(GO:0003700);molecular_function:protein binding(GO:0005515);cellular_component:nucleus(GO:0005634);cellular_component:transcription factor complex(GO:0005667);cellular_component:cytoplasm(GO:0005737);biological_process:transcription, DNA-templated(GO:0006351);biological_process:regulation of transcription, DNA-templated…
ENSDART00000127618	ENSDARG00000094673	8:25880909-25886887	2.71591	5.91916	1.12396	2.70742	0.0001	0.0005238	Ups	rhoab	K04513	molecular_function:nucleotide binding(GO:0000166);molecular_function:GTP binding(GO:0005525);cellular_component:plasma membrane(GO:0005886);biological_process:small GTPase mediated signal transduction(GO:0007264);biological_process:Rho protein signal transduction(GO:0007266);cellular_component:membrane(GO:0016020);biological_process:Wnt signaling pathway(GO:0016055);biological_process:regulation …
ENSDART00000127719	ENSDARG00000088087	7:21365761-21512136	27.598	10.7342	-1.36235	-10.254	5e-05	0.000273814	Down	kdm6ba	K11448	_
ENSDART00000127755	ENSDARG00000070981	19:9111093-9166432	5.0234	2.18892	-1.19844	-5.61416	5e-05	0.000273814	Down	ash1l	K06101	molecular_function:DNA binding(GO:0003677);molecular_function:chromatin binding(GO:0003682);cellular_component:nucleus(GO:0005634);molecular_function:methyltransferase activity(GO:0008168);molecular_function:zinc ion binding(GO:0008270);molecular_function:transferase activity(GO:0016740);molecular_function:histone-lysine N-methyltransferase activity(GO:0018024);biological_process:methylation(GO:0…
ENSDART00000127870	ENSDARG00000055527	12:13080236-13138615	17.7232	62.3848	1.81556	3.47749	5e-05	0.000273814	Ups	cmn	_	cellular_component:extracellular matrix(GO:0031012)
ENSDART00000128242	ENSDARG00000006408	21:34085268-34095286	17.2085	3.23019	-2.41343	-2.69698	0.0066	0.0227065	Down	hmgb3b	K11296	molecular_function:DNA binding(GO:0003677);cellular_component:nucleus(GO:0005634);biological_process:negative regulation of cell differentiation(GO:0045596)
ENSDART00000128291	ENSDARG00000043873	17:11223903-11264487	5.37528	2.03989	-1.39785	-7.3382	5e-05	0.000273814	Down	arid4a	_	molecular_function:DNA binding(GO:0003677);cellular_component:nucleus(GO:0005634);biological_process:regulation of transcription from RNA polymerase II promoter(GO:0006357);molecular_function:transcription regulatory region DNA binding(GO:0044212)
ENSDART00000128352	ENSDARG00000044766	9:7296793-7308984	1.22856	0.136988	-3.16484	-2.66289	0.01555	0.0473967	Down	mitd1	_	molecular_function:molecular_function(GO:0003674);cellular_component:cellular_component(GO:0005575);biological_process:biological_process(GO:0008150)
ENSDART00000128549	ENSDARG00000091131	22:748817-792003	1.58513	4.73052	1.57739	2.87984	5e-05	0.000273814	Ups	cry1bb	_	biological_process:negative regulation of transcription, DNA-templated(GO:0045892)
ENSDART00000128607	ENSDARG00000025348	9:47020156-47041700	0.858569	2.4339	1.50326	1.91247	0.0116	0.0370132	Ups	igfbp5b	_	biological_process:regulation of cell growth(GO:0001558);molecular_function:fibronectin binding(GO:0001968);molecular_function:insulin-like growth factor binding(GO:0005520);cellular_component:extracellular region(GO:0005576);cellular_component:extracellular space(GO:0005615);molecular_function:insulin-like growth factor I binding(GO:0031994);molecular_function:insulin-like growth factor II bindi…
ENSDART00000128639	ENSDARG00000086326	19:2051592-2079591	7.71423	3.58212	-1.10671	-7.94581	5e-05	0.000273814	Down	CABZ01071939.1	_	_
ENSDART00000128695	ENSDARG00000089049	23:1099563-1112732	1.60027	0.698212	-1.19658	-2.84743	0.0006	0.00270717	Down	CABZ01079870.1	_	_
ENSDART00000128718	ENSDARG00000025766	23:27114569-27134531	2.18417	0.768346	-1.50726	-2.30377	0.00955	0.0312321	Down	DTX3	K06058	molecular_function:zinc ion binding(GO:0008270)
ENSDART00000128786	ENSDARG00000053449	3:33209224-33213533	1.59454	3.48645	1.12862	2.4441	0.00265	0.0102015	Ups	pyya	K05233	molecular_function:hormone activity(GO:0005179);molecular_function:neuropeptide hormone activity(GO:0005184);molecular_function:protein binding(GO:0005515);cellular_component:extracellular region(GO:0005576);cellular_component:extracellular space(GO:0005615);biological_process:neuropeptide signaling pathway(GO:0007218);biological_process:neuropeptide signaling pathway(GO:0007218);biological_proce…
ENSDART00000128835	ENSDARG00000088002	4:16455664-16461870	8.10245	2.90356	-1.48053	-13.6404	5e-05	0.000273814	Down	BX322608.1	_	_
ENSDART00000128855	ENSDARG00000086654	7:4153680-4158745	1.93918	3.95154	1.02696	2.8152	0.0006	0.00270717	Ups	cbln11	_	_
ENSDART00000128859	ENSDARG00000016570	21:11012378-11043314	0.90802	2.69185	1.5678	8.34473	5e-05	0.000273814	Ups	prlra	K05081	molecular_function:cytokine receptor activity(GO:0004896);molecular_function:prolactin receptor activity(GO:0004925);cellular_component:membrane(GO:0016020);cellular_component:integral component of membrane(GO:0016021);biological_process:prolactin signaling pathway(GO:0038161)
ENSDART00000128888	ENSDARG00000019228	10:32590948-32666916	3.76362	1.12178	-1.74633	-4.38231	5e-05	0.000273814	Down	mogat2	K14457	biological_process:response to yeast(GO:0001878);cellular_component:membrane(GO:0016020);cellular_component:integral component of membrane(GO:0016021);molecular_function:transferase activity(GO:0016740);molecular_function:transferase activity, transferring acyl groups(GO:0016746);molecular_function:transferase activity, transferring acyl groups other than amino-acyl groups(GO:0016747)
ENSDART00000128937	ENSDARG00000058159	4:9359780-9388443	2.16564	4.76913	1.13893	2.24842	0.00265	0.0102015	Ups	ipo8	K18755	cellular_component:nuclear envelope(GO:0005635);cellular_component:cytosol(GO:0005829);biological_process:protein import into nucleus(GO:0006606);biological_process:intracellular protein transport(GO:0006886);biological_process:signal transduction(GO:0007165);molecular_function:Ran GTPase binding(GO:0008536);molecular_function:protein transporter activity(GO:0008565)
ENSDART00000129239	ENSDARG00000105400	7:6226173-6226643	1.15921	0	-inf	-nan	0.0001	0.0005238	Down	si:ch73-368j24.14	K11251	_
ENSDART00000129240	ENSDARG00000079762	22:9841555-9848818	9.90299	2.74821	-1.84937	-11.2928	5e-05	0.000273814	Down	si:dkey-253d23.4	_	molecular_function:receptor binding(GO:0005102);biological_process:immune response(GO:0006955);cellular_component:cell surface(GO:0009986);cellular_component:membrane(GO:0016020);cellular_component:integral component of membrane(GO:0016021)
ENSDART00000129302	ENSDARG00000020607	6:42372462-42379771	4.10019	32.5235	2.98772	9.89354	5e-05	0.000273814	Ups	emc3	_	cellular_component:Golgi apparatus(GO:0005794);cellular_component:membrane(GO:0016020);cellular_component:integral component of membrane(GO:0016021);cellular_component:integral component of membrane(GO:0016021);cellular_component:trans-Golgi network transport vesicle(GO:0030140);biological_process:protein folding in endoplasmic reticulum(GO:0034975);biological_process:photoreceptor cell maintenan…
ENSDART00000129380	ENSDARG00000034313	15:2764368-2790700	8.9562	2.553	-1.81069	-3.2134	5e-05	0.000273814	Down	ppp5c	_	molecular_function:phosphoprotein phosphatase activity(GO:0004721);biological_process:protein dephosphorylation(GO:0006470);molecular_function:hydrolase activity(GO:0016787)
ENSDART00000129398	ENSDARG00000045843	4:5325417-5655206	80.001	23.8873	-1.74378	-11.1784	5e-05	0.000273814	Down	apex1	K10771	biological_process:heart looping(GO:0001947);molecular_function:DNA binding(GO:0003677);molecular_function:RNA binding(GO:0003723);molecular_function:DNA-(apurinic or apyrimidinic site) lyase activity(GO:0003906);molecular_function:DNA-(apurinic or apyrimidinic site) lyase activity(GO:0003906);molecular_function:nuclease activity(GO:0004518);molecular_function:endonuclease activity(GO:0004519);ce…
ENSDART00000129525	ENSDARG00000040298	16:23999037-24033538	531.22	1262.99	1.24946	12.2514	5e-05	0.000273814	Ups	apoa4b.1	K08760	cellular_component:extracellular region(GO:0005576);biological_process:transport(GO:0006810);biological_process:lipid transport(GO:0006869);molecular_function:lipid binding(GO:0008289);biological_process:lipoprotein metabolic process(GO:0042157)
ENSDART00000129535	ENSDARG00000069230	8:18414339-18425079	0.389955	0.895555	1.19948	2.8046	0.00045	0.00208841	Ups	IQCA1L	_	molecular_function:ATP binding(GO:0005524);cellular_component:cellular_component(GO:0005575)
ENSDART00000129549	ENSDARG00000099277	4:63046411-63057403	0.31487	1.01275	1.68545	2.29657	0.01045	0.0337838	Ups	znf1018	_	_
ENSDART00000129617	ENSDARG00000037153	23:26152925-26167637	36.5072	13.327	-1.45383	-6.00697	5e-05	0.000273814	Down	atp6ap1b	K03662	biological_process:determination of left/right asymmetry in lateral mesoderm(GO:0003140);biological_process:retinal pigment epithelium development(GO:0003406);cellular_component:plasma membrane(GO:0005886);biological_process:eye pigment granule organization(GO:0008057);biological_process:ATP hydrolysis coupled proton transport(GO:0015991);cellular_component:membrane(GO:0016020);cellular_component…
ENSDART00000129811	ENSDARG00000091059	2:57369918-57429734	2.03977	0.990516	-1.04215	-2.57713	0.0021	0.00831574	Down	ONECUT3 (1 of many)	_	_
ENSDART00000129871	ENSDARG00000090071	14:49122948-49258059	0.145726	0.675369	2.21242	2.95211	0.0061	0.0212216	Ups	rxfp1	_	molecular_function:G-protein coupled receptor activity(GO:0004930);molecular_function:G-protein coupled receptor activity(GO:0004930);cellular_component:plasma membrane(GO:0005886);biological_process:signal transduction(GO:0007165);biological_process:G-protein coupled receptor signaling pathway(GO:0007186);biological_process:adenylate cyclase-modulating G-protein coupled receptor signaling pathwa…
ENSDART00000129969	ENSDARG00000086604	25:35817417-35817804	1.75468	0	-inf	-nan	5e-05	0.000273814	Down	HIST2H2AB (1 of many)	K11251	_
ENSDART00000129985	ENSDARG00000087999	22:9753271-9761685	0.596795	0.0616294	-3.27554	-3.34317	0.0146	0.0449326	Down	si:dkey-286j17.3	_	_
ENSDART00000130057	ENSDARG00000057927	24:24035654-24126497	2.01361	0.558588	-1.84993	-3.41395	5e-05	0.000273814	Down	rps6ka3b	K04373	molecular_function:nucleotide binding(GO:0000166);molecular_function:magnesium ion binding(GO:0000287);molecular_function:protein kinase activity(GO:0004672);molecular_function:protein serine/threonine kinase activity(GO:0004674);molecular_function:protein serine/threonine kinase activity(GO:0004674);molecular_function:ATP binding(GO:0005524);cellular_component:nucleus(GO:0005634);cellular_compon…
ENSDART00000130271	ENSDARG00000030125	20:19167012-19178841	1.88325	0.938177	-1.0053	-2.01908	0.004	0.014715	Down	sox7	K09270	biological_process:blood vessel development(GO:0001568);biological_process:blood vessel development(GO:0001568);biological_process:vasculogenesis(GO:0001570);biological_process:pronephros development(GO:0048793);biological_process:artery development(GO:0060840)
ENSDART00000130274	ENSDARG00000087762	21:1504773-1552774	0.846727	2.35614	1.47646	4.29316	5e-05	0.000273814	Ups	rab27b	K07886	molecular_function:GTP binding(GO:0005525);biological_process:small GTPase mediated signal transduction(GO:0007264);cellular_component:secretory granule(GO:0030141);biological_process:melanosome transport(GO:0032402);cellular_component:melanosome(GO:0042470);biological_process:positive regulation of exocytosis(GO:0045921)
ENSDART00000130286	ENSDARG00000089489	11:39839568-39864577	2.92551	0.912857	-1.68023	-3.76484	5e-05	0.000273814	Down	fam83e	_	_
ENSDART00000130292	ENSDARG00000071576	22:10037163-10063025	9.81083	4.54334	-1.11062	-4.62597	5e-05	0.000273814	Down	si:dkey-102c8.3	_	molecular_function:receptor binding(GO:0005102);biological_process:immune response(GO:0006955);cellular_component:cell surface(GO:0009986);cellular_component:membrane(GO:0016020);cellular_component:integral component of membrane(GO:0016021)
ENSDART00000130302	ENSDARG00000009534	2:10558577-10667185	36.2722	3.17186	-3.51546	-3.92967	5e-05	0.000273814	Down	wls	_	cellular_component:membrane(GO:0016020);cellular_component:integral component of membrane(GO:0016021);biological_process:Wnt signaling pathway(GO:0016055);molecular_function:Wnt-protein binding(GO:0017147);biological_process:habenula development(GO:0021986);biological_process:midbrain-hindbrain boundary development(GO:0030917);biological_process:embryonic viscerocranium morphogenesis(GO:0048703);…
ENSDART00000130467	ENSDARG00000052859	13:44898851-44926782	2.46701	10.3645	2.07082	2.67461	5e-05	0.000273814	Ups	chp1	K17610	molecular_function:calcium ion binding(GO:0005509);cellular_component:cellular_component(GO:0005575)
ENSDART00000130740	ENSDARG00000090901	3:58138192-58149447	0.104904	1.11245	3.40659	4.18885	0.0009	0.00391406	Ups	si:ch211-256e16.11	_	_
ENSDART00000130821	ENSDARG00000052708	6:54796408-54816373	9.96767	1.75043	-2.50955	-2.87458	0.007	0.0239089	Down	tnni1b	K10371	biological_process:skeletal muscle contraction(GO:0003009);molecular_function:molecular_function(GO:0003674);cellular_component:troponin complex(GO:0005861);cellular_component:troponin complex(GO:0005861);biological_process:heart development(GO:0007507);biological_process:cardiac muscle contraction(GO:0060048)
ENSDART00000130839	ENSDARG00000090394	11:648094-736223	5.41004	1.92621	-1.48987	-7.48579	5e-05	0.000273814	Down	FQ311892.1	_	_
ENSDART00000130989	ENSDARG00000090716	15:17349966-17404176	12.5186	3.32152	-1.91416	-7.11423	5e-05	0.000273814	Down	cltcb	K04646	molecular_function:structural molecule activity(GO:0005198);cellular_component:coated pit(GO:0005905);biological_process:intracellular protein transport(GO:0006886);cellular_component:membrane(GO:0016020);biological_process:vesicle-mediated transport(GO:0016192);cellular_component:clathrin coat of trans-Golgi network vesicle(GO:0030130);cellular_component:clathrin coat of coated pit(GO:0030132);c…
ENSDART00000131101	ENSDARG00000015546	11:27672517-27803385	0.517704	5.75897	3.47561	10.6525	5e-05	0.000273814	Ups	alpl	K01077	molecular_function:catalytic activity(GO:0003824);molecular_function:alkaline phosphatase activity(GO:0004035);biological_process:metabolic process(GO:0008152);biological_process:response to mechanical stimulus(GO:0009612);cellular_component:membrane(GO:0016020);cellular_component:integral component of membrane(GO:0016021);molecular_function:hydrolase activity(GO:0016787);molecular_function:phosp…
ENSDART00000131147	ENSDARG00000068934	13:41885314-41892978	1.93989	0.330888	-2.55156	-3.52329	0.0001	0.0005238	Down	cyp1b1	K07410	molecular_function:monooxygenase activity(GO:0004497);molecular_function:monooxygenase activity(GO:0004497);molecular_function:iron ion binding(GO:0005506);cellular_component:endoplasmic reticulum(GO:0005783);cellular_component:endoplasmic reticulum membrane(GO:0005789);biological_process:xenobiotic metabolic process(GO:0006805);biological_process:steroid metabolic process(GO:0008202);molecular_f…
ENSDART00000131351	ENSDARG00000045089	13:20248409-20250503	1.55888	5.14433	1.72248	4.14387	5e-05	0.000273814	Ups	si:ch211-270n8.1	_	_
ENSDART00000131635	ENSDARG00000020984	20:133487-158943	3.70494	1.73953	-1.09076	-2.82825	0.0006	0.00270717	Down	slc16a10	K08187	molecular_function:transporter activity(GO:0005215);cellular_component:plasma membrane(GO:0005886);cellular_component:integral component of plasma membrane(GO:0005887);molecular_function:aromatic amino acid transmembrane transporter activity(GO:0015173);molecular_function:thyroid hormone transmembrane transporter activity(GO:0015349);cellular_component:membrane(GO:0016020);cellular_component:inte…
ENSDART00000131666	ENSDARG00000057334	4:14728262-14737845	1.52038	3.26075	1.10077	1.77998	0.01495	0.0458481	Ups	cmasa	_	cellular_component:nucleus(GO:0005634);cellular_component:cytosol(GO:0005829);molecular_function:N-acylneuraminate cytidylyltransferase activity(GO:0008781);molecular_function:N-acylneuraminate cytidylyltransferase activity(GO:0008781);molecular_function:transferase activity(GO:0016740);molecular_function:nucleotidyltransferase activity(GO:0016779)
ENSDART00000131680	ENSDARG00000092856	23:33804660-33812414	4.55883	1.63207	-1.48196	-2.49617	0.00675	0.0231399	Down	si:ch211-210c8.7	_	cellular_component:membrane(GO:0016020);cellular_component:integral component of membrane(GO:0016021)
ENSDART00000131836	ENSDARG00000016074	2:11319636-11342622	1.04555	2.34175	1.16332	2.26298	0.001	0.00429809	Ups	cryz	K00344	molecular_function:zinc ion binding(GO:0008270);molecular_function:oxidoreductase activity(GO:0016491);biological_process:oxidation-reduction process(GO:0055114)
ENSDART00000131866	ENSDARG00000076546	16:38870453-38875047	4.82272	2.07432	-1.21721	-4.60096	5e-05	0.000273814	Down	trhra	K04282	molecular_function:signal transducer activity(GO:0004871);molecular_function:G-protein coupled receptor activity(GO:0004930);molecular_function:thyrotropin-releasing hormone receptor activity(GO:0004997);biological_process:signal transduction(GO:0007165);biological_process:G-protein coupled receptor signaling pathway(GO:0007186);cellular_component:membrane(GO:0016020);cellular_component:integral …
ENSDART00000131897	ENSDARG00000004184	10:37324869-37455267	1.67152	0.423761	-1.97984	-4.53417	5e-05	0.000273814	Down	nf1b	K08052	biological_process:blood vessel development(GO:0001568);biological_process:blood vessel development(GO:0001568);molecular_function:GTPase activator activity(GO:0005096);molecular_function:GTPase activator activity(GO:0005096);cellular_component:cytoplasm(GO:0005737);biological_process:signal transduction(GO:0007165);biological_process:heart development(GO:0007507);biological_process:memory(GO:000…
ENSDART00000131922	ENSDARG00000043154	10:36706162-36738764	8.99513	4.11346	-1.12879	-2.47897	0.00115	0.00486715	Down	ucp2	_	cellular_component:mitochondrion(GO:0005739);cellular_component:mitochondrial inner membrane(GO:0005743);biological_process:transport(GO:0006810);biological_process:mitochondrial transport(GO:0006839);cellular_component:membrane(GO:0016020);cellular_component:integral component of membrane(GO:0016021);cellular_component:mitochondrial membrane(GO:0031966)
ENSDART00000131992	ENSDARG00000094899	10:22921673-22946644	8.24852	3.5422	-1.21949	-4.33831	5e-05	0.000273814	Down	si:ch1073-143l10.2	_	biological_process:autophagosome assembly(GO:0000045);cellular_component:autophagosome membrane(GO:0000421);biological_process:negative stranded viral RNA replication(GO:0039689)
ENSDART00000132093	ENSDARG00000045343	20:23184699-23212627	1.15812	0.563944	-1.03816	-1.99991	0.0122	0.0386451	Down	usp46	K11842	_
ENSDART00000132163	ENSDARG00000092120	3:16724600-16726458	0.682464	0	-inf	-nan	5e-05	0.000273814	Down	si:ch211-222d3.3	_	_
ENSDART00000132223	ENSDARG00000093303	5:32658135-32658926	1.62283	0	-inf	-nan	5e-05	0.000273814	Down	ifitm1	K06566	biological_process:response to biotic stimulus(GO:0009607);cellular_component:membrane(GO:0016020);cellular_component:integral component of membrane(GO:0016021)
ENSDART00000132225	ENSDARG00000052816	3:40119070-40134213	21.9676	10.1557	-1.11309	-3.56849	5e-05	0.000273814	Down	shmt1	_	molecular_function:catalytic activity(GO:0003824);molecular_function:glycine hydroxymethyltransferase activity(GO:0004372);molecular_function:glycine hydroxymethyltransferase activity(GO:0004372);molecular_function:glycine hydroxymethyltransferase activity(GO:0004372);cellular_component:nucleus(GO:0005634);cellular_component:cytoplasm(GO:0005737);cellular_component:cytosol(GO:0005829);biological_…
ENSDART00000132235	ENSDARG00000008275	24:25616866-25643800	4.42005	1.4109	-1.64745	-3.71554	5e-05	0.000273814	Down	klhl24b	_	molecular_function:ubiquitin-protein transferase activity(GO:0004842);cellular_component:Cul3-RING ubiquitin ligase complex(GO:0031463);biological_process:regulation of kainate selective glutamate receptor activity(GO:2000312)
ENSDART00000132331	ENSDARG00000002168	9:12607873-12623574	5.41338	1.03223	-2.39077	-2.58367	0.00715	0.0243468	Down	tra2b	_	molecular_function:nucleotide binding(GO:0000166);molecular_function:nucleic acid binding(GO:0003676)
ENSDART00000132354	ENSDARG00000010681	13:3851432-4005645	3.51158	1.65769	-1.08294	-3.61961	5e-05	0.000273814	Down	tjap1	K06105	cellular_component:bicellular tight junction(GO:0005923)
ENSDART00000132501	ENSDARG00000061062	9:41657971-41679863	5.66721	2.65932	-1.09158	-2.14708	0.0065	0.0224149	Down	nemp2	_	cellular_component:nuclear envelope(GO:0005635);cellular_component:membrane(GO:0016020);cellular_component:integral component of membrane(GO:0016021)
ENSDART00000132504	ENSDARG00000036147	7:32562990-32624518	1.73063	5.30582	1.61628	2.1661	0.0076	0.0256787	Ups	ano5b	_	cellular_component:membrane(GO:0016020);cellular_component:integral component of membrane(GO:0016021);molecular_function:protein dimerization activity(GO:0046983)
ENSDART00000132534	ENSDARG00000074442	18:38340030-38383454	0.532277	1.39339	1.38835	2.77887	0.00195	0.00777689	Ups	alx4b	_	molecular_function:DNA binding(GO:0003677);molecular_function:sequence-specific DNA binding transcription factor activity(GO:0003700);cellular_component:nucleus(GO:0005634);biological_process:regulation of transcription, DNA-templated(GO:0006355);biological_process:regulation of transcription from RNA polymerase II promoter(GO:0006357);biological_process:multicellular organismal development(GO:00…
ENSDART00000132596	ENSDARG00000042112	8:18003857-18006377	0.424193	0.901899	1.08824	1.82176	0.01465	0.0450666	Ups	dio1	K01562	molecular_function:thyroxine 5'-deiodinase activity(GO:0004800);cellular_component:membrane(GO:0016020);cellular_component:integral component of membrane(GO:0016021);molecular_function:oxidoreductase activity(GO:0016491);biological_process:hormone biosynthetic process(GO:0042446);biological_process:oxidation-reduction process(GO:0055114);biological_process:regulation of neural retina development(…
ENSDART00000132629	ENSDARG00000093431	6:9009547-9015583	0.530603	1.8231	1.78069	3.18083	0.00055	0.00250382	Ups	iqcb1	_	_
ENSDART00000132670	ENSDARG00000070918	22:38276173-38287021	3.32303	7.97216	1.26247	3.07686	5e-05	0.000273814	Ups	si:ch211-284e20.8	_	molecular_function:endopeptidase inhibitor activity(GO:0004866);molecular_function:cysteine-type endopeptidase inhibitor activity(GO:0004869);cellular_component:extracellular region(GO:0005576)
ENSDART00000132741	ENSDARG00000057121	21:20706239-20896022	5.49265	0.508887	-3.43208	-10.2066	5e-05	0.000273814	Down	C7 (1 of many)	K03996	cellular_component:membrane attack complex(GO:0005579);biological_process:immune response(GO:0006955)
ENSDART00000132829	ENSDARG00000024964	22:16542852-16732703	3.85224	1.87993	-1.03502	-5.18846	5e-05	0.000273814	Down	inadl	K06092	_
ENSDART00000132890	ENSDARG00000076693	9:22316748-22528713	11.2591	32.521	1.53027	4.47779	5e-05	0.000273814	Ups	crygm2d19	_	_
ENSDART00000132961	ENSDARG00000020866	16:23999037-24033538	2.03521	5.13076	1.334	2.2537	0.00855	0.0283973	Ups	apoa4b.2	_	cellular_component:extracellular region(GO:0005576);biological_process:cholesterol biosynthetic process(GO:0006695);biological_process:transport(GO:0006810);biological_process:lipid transport(GO:0006869);molecular_function:lipid binding(GO:0008289);biological_process:positive regulation of cholesterol esterification(GO:0010873);biological_process:positive regulation of triglyceride catabolic proc…
ENSDART00000133134	ENSDARG00000020811	21:25551830-25568004	8.98239	3.67374	-1.28985	-2.75477	5e-05	0.000273814	Down	efemp2b	_	molecular_function:calcium ion binding(GO:0005509)
ENSDART00000133150	ENSDARG00000062278	19:25928573-25935389	0.233489	2.23069	3.25607	3.41611	0.00275	0.0105371	Ups	C1GALT1 (1 of many)	K00731	cellular_component:membrane(GO:0016020);molecular_function:glycoprotein-N-acetylgalactosamine 3-beta-galactosyltransferase activity(GO:0016263);biological_process:O-glycan processing, core 1(GO:0016267);molecular_function:transferase activity, transferring glycosyl groups(GO:0016757)
ENSDART00000133160	ENSDARG00000094191	4:17338727-17381441	2.50295	1.15428	-1.11664	-2.39008	0.0024	0.0093369	Down	nup37	K14302	biological_process:biological_process(GO:0008150);cellular_component:nuclear pore outer ring(GO:0031080)
ENSDART00000133222	ENSDARG00000093112	2:23109840-23136809	0.936672	0.263137	-1.83173	-3.99787	0.0001	0.0005238	Down	espnlb	_	_
ENSDART00000133295	ENSDARG00000089831	4:39778362-40139189	0.0597461	1.36475	4.51364	4.12862	0.00245	0.00950758	Ups	si:dkey-207m2.4	_	_
ENSDART00000133449	ENSDARG00000093185	15:44347261-44382352	0.649055	0.184414	-1.81539	-3.5929	0.00045	0.00208841	Down	GUCY1A2	K12318	_
ENSDART00000133533	ENSDARG00000078417	12:15321155-15419155	0.312702	0.666091	1.09093	1.81763	0.01405	0.0435809	Ups	plxdc1	_	biological_process:angiogenesis(GO:0001525);cellular_component:membrane(GO:0016020);cellular_component:integral component of membrane(GO:0016021)
ENSDART00000133535	ENSDARG00000093461	4:53025649-53039571	0.28468	2.16634	2.92785	2.96769	0.00895	0.0295152	Ups	si:dkey-56m15.6	_	_
ENSDART00000133843	ENSDARG00000004227	4:2822542-2938001	1.62258	0.801047	-1.01833	-2.60748	0.00015	0.000764619	Down	pde3a	K19021	molecular_function:cyclic-nucleotide phosphodiesterase activity(GO:0004112);molecular_function:3',5'-cyclic-nucleotide phosphodiesterase activity(GO:0004114);molecular_function:3',5'-cyclic-AMP phosphodiesterase activity(GO:0004115);molecular_function:calmodulin-dependent cyclic-nucleotide phosphodiesterase activity(GO:0004117);molecular_function:cGMP-stimulated cyclic-nucleotide phosphodiesteras…
ENSDART00000133844	ENSDARG00000031632	1:27337982-27353092	3.70542	1.43966	-1.3639	-2.13974	0.0038	0.0140588	Down	chst10	_	cellular_component:Golgi membrane(GO:0000139);molecular_function:N-acetylglucosamine 6-O-sulfotransferase activity(GO:0001517);molecular_function:N-acetylgalactosamine 4-O-sulfotransferase activity(GO:0001537);molecular_function:heparan sulfate 2-O-sulfotransferase activity(GO:0004394);cellular_component:Golgi apparatus(GO:0005794);biological_process:carbohydrate metabolic process(GO:0005975);mol…
ENSDART00000133895	ENSDARG00000055569	12:13489118-13511235	0.636672	0.308769	-1.04402	-2.06153	0.00845	0.0281321	Down	ghdc	_	molecular_function:molecular_function(GO:0003674);cellular_component:cellular_component(GO:0005575);biological_process:biological_process(GO:0008150)
ENSDART00000134033	ENSDARG00000069009	8:22262324-22267022	1.66571	3.81603	1.19594	2.12262	0.0136	0.0423828	Ups	si:ch211-147a11.3	_	molecular_function:molecular_function(GO:0003674);cellular_component:nucleus(GO:0005634);biological_process:biological_process(GO:0008150)
ENSDART00000134054	ENSDARG00000093058	4:16794797-16835301	17.0848	5.69305	-1.58544	-6.63823	5e-05	0.000273814	Down	si:dkey-13i19.8	_	cellular_component:mitochondrial respiratory chain(GO:0005746)
ENSDART00000134077	ENSDARG00000056186	2:26161208-26501150	168.697	80.4924	-1.06751	-2.87822	5e-05	0.000273814	Down	eif5a2	K03263	molecular_function:RNA binding(GO:0003723);molecular_function:translation elongation factor activity(GO:0003746);biological_process:translation(GO:0006412);biological_process:translational frameshifting(GO:0006452);molecular_function:ribosome binding(GO:0043022);biological_process:positive regulation of translational elongation(GO:0045901);biological_process:positive regulation of translational t…
ENSDART00000134184	ENSDARG00000068503	5:23264576-23301587	2.48061	5.62473	1.18109	2.38339	0.00075	0.00330965	Ups	gbgt1l4	_	cellular_component:Golgi apparatus(GO:0005794);biological_process:carbohydrate metabolic process(GO:0005975);biological_process:glycolipid biosynthetic process(GO:0009247);cellular_component:membrane(GO:0016020);cellular_component:integral component of membrane(GO:0016021);molecular_function:transferase activity(GO:0016740);molecular_function:transferase activity, transferring glycosyl groups(GO:…
ENSDART00000134208	ENSDARG00000025338	3:18606425-18642794	4.17714	0.858194	-2.28314	-2.90651	0.00395	0.014556	Down	hagh	K01069	molecular_function:hydroxyacylglutathione hydrolase activity(GO:0004416);cellular_component:cytoplasm(GO:0005737);cellular_component:mitochondrion(GO:0005739);cellular_component:mitochondrial matrix(GO:0005759);molecular_function:hydrolase activity(GO:0016787);biological_process:methylglyoxal catabolic process to D-lactate(GO:0019243);molecular_function:metal ion binding(GO:0046872)
ENSDART00000134251	ENSDARG00000062058	24:39890800-39997944	0.980142	2.95799	1.59355	6.08912	5e-05	0.000273814	Ups	slc12a7b	_	molecular_function:transporter activity(GO:0005215);cellular_component:integral component of plasma membrane(GO:0005887);biological_process:transport(GO:0006810);biological_process:ion transport(GO:0006811);biological_process:cell volume homeostasis(GO:0006884);biological_process:synaptic transmission(GO:0007268);molecular_function:cation:chloride symporter activity(GO:0015377);molecular_function…
ENSDART00000134259	ENSDARG00000009830	6:26884277-26905189	14.5235	6.59093	-1.13984	-2.14076	0.00375	0.0138923	Down	hdlbpa	_	molecular_function:nucleic acid binding(GO:0003676);molecular_function:RNA binding(GO:0003723);biological_process:cellular response to estrogen stimulus(GO:0071391)
ENSDART00000134266	ENSDARG00000036942	19:24932-325377	9.744	3.47779	-1.48634	-2.20467	0.0001	0.0005238	Down	gpd1c	K00006	molecular_function:glycerol-3-phosphate dehydrogenase [NAD+] activity(GO:0004367);biological_process:carbohydrate metabolic process(GO:0005975);biological_process:glycerol-3-phosphate metabolic process(GO:0006072);cellular_component:glycerol-3-phosphate dehydrogenase complex(GO:0009331);molecular_function:oxidoreductase activity(GO:0016491);molecular_function:oxidoreductase activity, acting on th…
ENSDART00000134317	ENSDARG00000020008	5:40910233-40920827	13.8564	45.1224	1.7033	2.67996	0.00085	0.00371048	Ups	vcp	_	molecular_function:nucleotide binding(GO:0000166);molecular_function:ATP binding(GO:0005524);cellular_component:nucleus(GO:0005634);cellular_component:cytoplasm(GO:0005737);cellular_component:cytosol(GO:0005829);biological_process:DNA repair(GO:0006281);biological_process:double-strand break repair(GO:0006302);biological_process:transport(GO:0006810);biological_process:autophagy(GO:0006914);biolo…
ENSDART00000134348	ENSDARG00000020454	18:44622132-44655070	8.11429	21.9423	1.43518	2.85723	0.0013	0.00542878	Ups	psmd8	_	molecular_function:molecular_function(GO:0003674);cellular_component:nucleus(GO:0005634);cellular_component:cytosol(GO:0005829);cellular_component:proteasome regulatory particle(GO:0005838);biological_process:proteolysis(GO:0006508);cellular_component:proteasome regulatory particle, lid subcomplex(GO:0008541);biological_process:proteasome-mediated ubiquitin-dependent protein catabolic process(GO:…
ENSDART00000134400	ENSDARG00000093518	18:22039607-22105036	1.87479	0.485688	-1.94863	-3.30726	0.0003	0.00143914	Down	si:ch73-186j5.4	_	_
ENSDART00000134423	ENSDARG00000088589	7:22403904-22406054	10.4151	1.88674	-2.46471	-6.72711	5e-05	0.000273814	Down	ponzr3	_	molecular_function:molecular_function(GO:0003674);cellular_component:cellular_component(GO:0005575);biological_process:biological_process(GO:0008150)
ENSDART00000134448	ENSDARG00000074346	16:26635910-26654971	3.14791	1.46406	-1.10442	-2.4657	0.00055	0.00250382	Down	l3mbtl1b	_	molecular_function:sequence-specific DNA binding transcription factor activity(GO:0003700);cellular_component:nucleus(GO:0005634);biological_process:regulation of transcription, DNA-templated(GO:0006355);molecular_function:zinc ion binding(GO:0008270)
ENSDART00000134630	ENSDARG00000007808	13:31249333-31259211	1.40843	3.59662	1.35256	3.12468	5e-05	0.000273814	Ups	zdhhc16a	K18932	cellular_component:Golgi apparatus(GO:0005794);molecular_function:zinc ion binding(GO:0008270);cellular_component:membrane(GO:0016020);cellular_component:integral component of membrane(GO:0016021);molecular_function:palmitoyltransferase activity(GO:0016409);molecular_function:transferase activity(GO:0016740);molecular_function:transferase activity, transferring acyl groups(GO:0016746);biological_…
ENSDART00000134679	ENSDARG00000093688	10:4962426-4962966	0	5.51898	inf	-nan	0.00025	0.0012226	Ups	si:ch73-234b20.4	_	_
ENSDART00000134711	ENSDARG00000014651	2:49083727-49092477	5.93596	1.18722	-2.32189	-3.25909	0.00175	0.00707831	Down	svilb	_	_
ENSDART00000134805	ENSDARG00000087324	9:22316748-22528713	3.837	12.796	1.73764	6.37714	5e-05	0.000273814	Ups	crygm2d1	_	molecular_function:molecular_function(GO:0003674);cellular_component:cellular_component(GO:0005575);biological_process:biological_process(GO:0008150)
ENSDART00000134816	ENSDARG00000013295	19:9766282-9793605	9.4602	4.01622	-1.23603	-2.43343	0.0004	0.00187349	Down	slc2a3a	K08142	molecular_function:transporter activity(GO:0005215);biological_process:transport(GO:0006810);cellular_component:membrane(GO:0016020);cellular_component:integral component of membrane(GO:0016021);molecular_function:transmembrane transporter activity(GO:0022857);molecular_function:substrate-specific transmembrane transporter activity(GO:0022891);biological_process:transmembrane transport(GO:0055085)
ENSDART00000134824	ENSDARG00000092994	4:44036497-44043714	0.474505	1.31825	1.47413	2.19833	0.01045	0.0337838	Ups	znf1107	_	_
ENSDART00000134851	ENSDARG00000077686	10:41140466-41235207	1.65771	0.62641	-1.40401	-2.24825	0.00965	0.0315075	Down	aak1b	_	molecular_function:protein kinase activity(GO:0004672);molecular_function:protein serine/threonine kinase activity(GO:0004674);molecular_function:ATP binding(GO:0005524);cellular_component:cytoplasm(GO:0005737);biological_process:protein phosphorylation(GO:0006468);molecular_function:AP-2 adaptor complex binding(GO:0035612);biological_process:positive regulation of Notch signaling pathway(GO:0045…
ENSDART00000134902	ENSDARG00000012820	21:11866129-11888895	6.02445	2.92633	-1.04174	-2.54705	0.0007	0.00311162	Down	nop56	_	biological_process:rRNA modification(GO:0000154);biological_process:heart development(GO:0007507);molecular_function:snoRNA binding(GO:0030515);cellular_component:box C/D snoRNP complex(GO:0031428);cellular_component:small-subunit processome(GO:0032040)
ENSDART00000134912	ENSDARG00000032317	2:22324850-22447193	17.9362	8.96279	-1.00086	-2.93738	5e-05	0.000273814	Down	tox	_	_
ENSDART00000134922	ENSDARG00000061580	10:32937725-32946757	0.562814	1.25156	1.153	2.98982	0.0004	0.00187349	Ups	kctd7	_	cellular_component:cytoplasm(GO:0005737);cellular_component:cytosol(GO:0005829);cellular_component:plasma membrane(GO:0005886);cellular_component:membrane(GO:0016020);biological_process:protein homooligomerization(GO:0051260)
ENSDART00000134958	ENSDARG00000076144	3:54489466-54519018	1.73477	5.05905	1.54412	4.98577	5e-05	0.000273814	Ups	si:ch211-74m13.3	_	molecular_function:integrin binding(GO:0005178);cellular_component:integral component of plasma membrane(GO:0005887);biological_process:cell adhesion(GO:0007155);cellular_component:membrane(GO:0016020);cellular_component:integral component of membrane(GO:0016021);biological_process:single organismal cell-cell adhesion(GO:0016337)
ENSDART00000134971	ENSDARG00000079347	3:695477-1005574	2.60305	0.602425	-2.11135	-3.71061	0.00025	0.0012226	Down	zgc:194659	_	cellular_component:cellular_component(GO:0005575);biological_process:biological_process(GO:0008150)
ENSDART00000135003	ENSDARG00000092578	10:28541596-28545184	2.80237	1.13009	-1.3102	-2.97377	5e-05	0.000273814	Down	si:ch211-222e20.4	_	_
ENSDART00000135083	ENSDARG00000035559	5:23582426-23594005	6.11303	17.3856	1.50793	3.39737	5e-05	0.000273814	Ups	tp53	_	biological_process:DNA damage checkpoint(GO:0000077);biological_process:negative regulation of transcription from RNA polymerase II promoter(GO:0000122);cellular_component:chromatin(GO:0000785);molecular_function:p53 binding(GO:0002039);molecular_function:DNA binding(GO:0003677);molecular_function:chromatin binding(GO:0003682);molecular_function:damaged DNA binding(GO:0003684);molecular_function:…
ENSDART00000135178	ENSDARG00000033738	23:28447916-28461972	5.29072	1.92897	-1.45563	-2.39013	0.0021	0.00831574	Down	zgc:153867	_	molecular_function:calcium ion binding(GO:0005509)
ENSDART00000135386	ENSDARG00000061173	18:44538744-44571298	4.36829	1.48217	-1.55936	-2.1912	0.0059	0.020626	Down	st14a	_	molecular_function:serine-type endopeptidase activity(GO:0004252);biological_process:proteolysis(GO:0006508);molecular_function:peptidase activity(GO:0008233);molecular_function:serine-type peptidase activity(GO:0008236);biological_process:epidermis development(GO:0008544);cellular_component:membrane(GO:0016020);cellular_component:integral component of membrane(GO:0016021);molecular_function:hydr…
ENSDART00000135392	ENSDARG00000094602	24:22614276-22624822	0.76983	3.70448	2.26666	5.80625	5e-05	0.000273814	Ups	si:dkey-7n6.2	K15985	_
ENSDART00000135464	ENSDARG00000059028	8:4377715-4451542	4.13133	0.389243	-3.40786	-3.05617	0.0034	0.012741	Down	srrd	_	molecular_function:molecular_function(GO:0003674);cellular_component:cellular_component(GO:0005575);biological_process:biological_process(GO:0008150)
ENSDART00000135597	ENSDARG00000062506	18:17090120-17158534	4.07853	10.9402	1.42352	4.53106	5e-05	0.000273814	Ups	zc3h18	_	cellular_component:nucleus(GO:0005634);molecular_function:metal ion binding(GO:0046872)
ENSDART00000135619	ENSDARG00000011652	9:3147445-3160139	0.320966	0.7497	1.2239	2.42115	0.0028	0.0107096	Ups	si:zfos-979f1.2	_	_
ENSDART00000135620	ENSDARG00000036754	23:31431556-31446276	1.29047	3.06105	1.24613	2.27385	0.0068	0.0232799	Ups	hmgn3	K11301	cellular_component:chromatin(GO:0000785);molecular_function:chromatin binding(GO:0003682);cellular_component:nucleus(GO:0005634);molecular_function:nucleosomal DNA binding(GO:0031492);biological_process:positive regulation of transcription from RNA polymerase II promoter(GO:0045944);biological_process:regulation of insulin secretion involved in cellular response to glucose stimulus(GO:0061178)
ENSDART00000135721	ENSDARG00000089901	8:22468829-22475063	1.16257	0	-inf	-nan	0.0002	0.000995331	Down	si:ch211-261n11.8	_	molecular_function:tumor necrosis factor-activated receptor activity(GO:0005031);cellular_component:integral component of plasma membrane(GO:0005887);biological_process:inflammatory response(GO:0006954);biological_process:immune response(GO:0006955);biological_process:multicellular organismal development(GO:0007275);cellular_component:membrane(GO:0016020);cellular_component:integral component of …
ENSDART00000135940	ENSDARG00000007671	21:20706239-20896022	1.86174	0.169248	-3.45945	-2.89656	0.00775	0.0261223	Down	ghrb	_	cellular_component:membrane(GO:0016020);cellular_component:integral component of membrane(GO:0016021)
ENSDART00000135971	ENSDARG00000037870	3:40384248-40387946	8.06712	3.38034	-1.25488	-2.08064	0.0023	0.00899296	Down	actb2	_	molecular_function:nucleotide binding(GO:0000166);molecular_function:ATP binding(GO:0005524);cellular_component:cytoplasm(GO:0005737);cellular_component:cytoskeleton(GO:0005856);cellular_component:cytoskeleton(GO:0005856);cellular_component:plasma membrane(GO:0005886);cellular_component:focal adhesion(GO:0005925);cellular_component:dense body(GO:0097433)
ENSDART00000136074	ENSDARG00000004396	2:7951388-7959268	1.40361	5.11767	1.86635	7.10724	5e-05	0.000273814	Ups	b3gnt5b	K03766	molecular_function:alpha-1,6-mannosyltransferase activity(GO:0000009);molecular_function:alpha-1,2-mannosyltransferase activity(GO:0000026);molecular_function:mannosyltransferase activity(GO:0000030);molecular_function:alpha-1,3-mannosyltransferase activity(GO:0000033);cellular_component:Golgi membrane(GO:0000139);molecular_function:alpha-1,3-galactosyltransferase activity(GO:0001962);molecular_f…
ENSDART00000136092	ENSDARG00000100568	4:67023062-67395423	0.364258	2.44898	2.74915	2.92794	0.0033	0.0124146	Ups	si:ch211-209j12.3	_	_
ENSDART00000136106	ENSDARG00000089318	4:28860206-29154519	1.57335	0.362659	-2.11716	-2.99666	0.0003	0.00143914	Down	si:dkey-69c19.1	_	_
ENSDART00000136136	ENSDARG00000040959	9:32838329-32841673	1.50201	7.16501	2.25407	6.31577	5e-05	0.000273814	Ups	rabl3	K07933	molecular_function:nucleotide binding(GO:0000166);molecular_function:GTP binding(GO:0005525);biological_process:small GTPase mediated signal transduction(GO:0007264)
ENSDART00000136152	ENSDARG00000045676	4:13569606-13577366	41.137	17.5752	-1.22689	-4.68745	5e-05	0.000273814	Down	calua	_	molecular_function:calcium ion binding(GO:0005509);cellular_component:extracellular region(GO:0005576);cellular_component:endoplasmic reticulum(GO:0005783);cellular_component:endoplasmic reticulum membrane(GO:0005789);cellular_component:Golgi apparatus(GO:0005794);cellular_component:membrane(GO:0016020);cellular_component:sarcoplasmic reticulum(GO:0016529);cellular_component:sarcoplasmic reticulu…
ENSDART00000136175	ENSDARG00000043010	7:57423276-57578210	6.60908	2.17112	-1.60601	-2.23102	0.0028	0.0107096	Down	camk2d1	_	molecular_function:nucleotide binding(GO:0000166);molecular_function:protein kinase activity(GO:0004672);molecular_function:protein serine/threonine kinase activity(GO:0004674);molecular_function:calmodulin-dependent protein kinase activity(GO:0004683);molecular_function:calmodulin binding(GO:0005516);molecular_function:ATP binding(GO:0005524);biological_process:protein phosphorylation(GO:0006468…
ENSDART00000136205	ENSDARG00000030602	16:24274932-24280294	4.93555	10.7111	1.11782	3.5075	5e-05	0.000273814	Ups	rps19	K02966	biological_process:ribosomal small subunit assembly(GO:0000028);molecular_function:structural constituent of ribosome(GO:0003735);molecular_function:structural constituent of ribosome(GO:0003735);cellular_component:intracellular(GO:0005622);cellular_component:ribosome(GO:0005840);cellular_component:ribosome(GO:0005840);biological_process:translation(GO:0006412);cellular_component:cytosolic small …
ENSDART00000136281	ENSDARG00000044261	10:9716738-9737507	5.32799	11.4601	1.10496	1.9955	0.00505	0.01799	Ups	si:ch211-243g18.2	_	molecular_function:structural molecule activity(GO:0005198);cellular_component:intermediate filament(GO:0005882)
ENSDART00000136313	ENSDARG00000093936	18:7632445-7634646	1.49079	3.6624	1.29671	4.59319	5e-05	0.000273814	Ups	si:dkeyp-1h4.6	_	_
ENSDART00000136331	ENSDARG00000015208	11:12686957-12710968	6.37181	2.67978	-1.24959	-1.97963	0.00675	0.0231399	Down	rbb4l	_	cellular_component:nucleus(GO:0005634);biological_process:DNA replication(GO:0006260);biological_process:transcription, DNA-templated(GO:0006351);biological_process:regulation of transcription, DNA-templated(GO:0006355);biological_process:covalent chromatin modification(GO:0016569);biological_process:fin regeneration(GO:0031101);cellular_component:ESC/E(Z) complex(GO:0035098)
ENSDART00000136378	ENSDARG00000031952	1:54460291-54467434	0.311707	1.29784	2.05785	2.55827	0.00815	0.0272698	Ups	mb	_	biological_process:vasculogenesis(GO:0001570);biological_process:response to hypoxia(GO:0001666);molecular_function:oxygen transporter activity(GO:0005344);cellular_component:cellular_component(GO:0005575);biological_process:transport(GO:0006810);biological_process:response to activity(GO:0014823);biological_process:oxygen transport(GO:0015671);molecular_function:oxygen binding(GO:0019825);molecu…
ENSDART00000136413	ENSDARG00000035324	5:36299537-36324359	17.0169	5.57777	-1.60921	-4.41596	5e-05	0.000273814	Down	hnrpl	_	molecular_function:nucleotide binding(GO:0000166);molecular_function:nucleic acid binding(GO:0003676);molecular_function:RNA binding(GO:0003723);cellular_component:nucleus(GO:0005634);biological_process:mRNA processing(GO:0006397)
ENSDART00000136445	ENSDARG00000092583	4:40685263-40695165	3.82112	13.7568	1.84808	6.69755	5e-05	0.000273814	Ups	si:dkey-16p19.5	_	_
ENSDART00000136469	ENSDARG00000005525	1:51855223-51876018	15.3997	7.57094	-1.02436	-3.66154	5e-05	0.000273814	Down	acy3.2	_	cellular_component:cytoplasm(GO:0005737);cellular_component:plasma membrane(GO:0005886);biological_process:metabolic process(GO:0008152);cellular_component:membrane(GO:0016020);cellular_component:apical plasma membrane(GO:0016324);molecular_function:hydrolase activity(GO:0016787);molecular_function:hydrolase activity, acting on ester bonds(GO:0016788);molecular_function:hydrolase activity, acting…
ENSDART00000136495	ENSDARG00000038059	3:25305656-25361828	1.12209	3.68273	1.71458	2.39867	0.0039	0.0143869	Ups	grb2b	_	_
ENSDART00000136518	ENSDARG00000043035	20:26037279-26102200	4.67236	11.3569	1.28134	4.18081	5e-05	0.000273814	Ups	capn3b	_	molecular_function:calcium-dependent cysteine-type endopeptidase activity(GO:0004198);molecular_function:calcium-dependent cysteine-type endopeptidase activity(GO:0004198);molecular_function:calcium ion binding(GO:0005509);cellular_component:intracellular(GO:0005622);cellular_component:cytoplasm(GO:0005737);biological_process:proteolysis(GO:0006508);biological_process:proteolysis(GO:0006508);mole…
ENSDART00000136544	ENSDARG00000069142	18:18647206-18678385	7.49615	2.0769	-1.85172	-4.94734	5e-05	0.000273814	Down	aars	_	molecular_function:tRNA binding(GO:0000049);molecular_function:tRNA binding(GO:0000049);molecular_function:nucleotide binding(GO:0000166);molecular_function:nucleic acid binding(GO:0003676);molecular_function:RNA binding(GO:0003723);molecular_function:aminoacyl-tRNA ligase activity(GO:0004812);molecular_function:alanine-tRNA ligase activity(GO:0004813);molecular_function:alanine-tRNA ligase activ…
ENSDART00000136640	ENSDARG00000061345	25:34243166-34299071	6.05269	2.25766	-1.42275	-3.87679	5e-05	0.000273814	Down	wwp2	K05630	molecular_function:ubiquitin-protein transferase activity(GO:0004842);cellular_component:nucleus(GO:0005634);cellular_component:nucleus(GO:0005634);cellular_component:cytoplasm(GO:0005737);molecular_function:UDP-N-acetylmuramoylalanyl-D-glutamyl-2,6-diaminopimelate-D-alanyl-D-alanine ligase activity(GO:0008766);biological_process:protein ubiquitination(GO:0016567);molecular_function:ligase activi…
ENSDART00000136675	ENSDARG00000021611	23:25274535-25277772	12.7373	4.81489	-1.40348	-3.04887	0.0007	0.00311162	Down	im:7152756	_	_
ENSDART00000136764	ENSDARG00000078138	1:53960474-53971115	4.64915	1.32007	-1.81635	-3.9604	5e-05	0.000273814	Down	si:ch211-202h22.8	_	cellular_component:membrane(GO:0016020);cellular_component:integral component of membrane(GO:0016021)
ENSDART00000136773	ENSDARG00000092436	4:50480543-50486215	0.329077	1.27403	1.9529	2.16471	0.0149	0.0457199	Ups	BX640584.1	_	_
ENSDART00000136919	ENSDARG00000025608	3:32822454-32826860	0.743372	1.63464	1.13682	2.11675	0.00395	0.014556	Ups	casp6l1	_	molecular_function:cysteine-type endopeptidase activity(GO:0004197);cellular_component:cytoplasm(GO:0005737);biological_process:proteolysis(GO:0006508);molecular_function:peptidase activity(GO:0008233);molecular_function:cysteine-type peptidase activity(GO:0008234);molecular_function:hydrolase activity(GO:0016787);molecular_function:cysteine-type endopeptidase activity involved in apoptotic proce…
ENSDART00000136952	ENSDARG00000076819	15:41354193-41565835	0.90166	0.0659589	-3.77294	-4.74553	0.00335	0.0125789	Down	si:dkey-121n8.4	_	molecular_function:nucleotide binding(GO:0000166);molecular_function:ATP binding(GO:0005524)
ENSDART00000136985	ENSDARG00000093998	9:28799305-28805690	1.47286	0.348646	-2.07879	-4.31438	5e-05	0.000273814	Down	si:ch73-7i4.2	_	molecular_function:molecular_function(GO:0003674);cellular_component:cellular_component(GO:0005575);biological_process:biological_process(GO:0008150)
ENSDART00000137008	ENSDARG00000012699	10:28586883-28590398	1.47283	0	-inf	-nan	0.00095	0.00410593	Down	bbx	_	_
ENSDART00000137043	ENSDARG00000034555	9:14829241-15236926	4.51228	1.92151	-1.23161	-2.27706	0.00865	0.0286919	Down	pard3bb	_	_
ENSDART00000137089	ENSDARG00000011422	10:33462958-33596476	4.54427	2.06161	-1.14028	-8.80954	5e-05	0.000273814	Down	ryr1a	K04961	molecular_function:ion channel activity(GO:0005216);molecular_function:ryanodine-sensitive calcium-release channel activity(GO:0005219);molecular_function:ryanodine-sensitive calcium-release channel activity(GO:0005219);molecular_function:calcium channel activity(GO:0005262);molecular_function:calcium ion binding(GO:0005509);molecular_function:calcium ion binding(GO:0005509);cellular_component:sm…
ENSDART00000137103	ENSDARG00000037060	23:27830442-27842452	7.04719	2.90787	-1.27708	-5.20852	5e-05	0.000273814	Down	kmt2d	_	biological_process:chondrocyte intercalation involved in growth plate cartilage morphogenesis(GO:0003428);cellular_component:nucleus(GO:0005634);biological_process:brain development(GO:0007420);biological_process:heart development(GO:0007507);molecular_function:methyltransferase activity(GO:0008168);molecular_function:zinc ion binding(GO:0008270);molecular_function:transferase activity(GO:0016740…
ENSDART00000137118	ENSDARG00000103832	4:69945187-69952235	1.70092	0.236179	-2.84837	-2.88515	0.00995	0.0323697	Down	CU457778.4	_	_
ENSDART00000137130	ENSDARG00000093647	9:19359794-19595682	13.1813	4.11175	-1.68067	-2.38782	0.01465	0.0450666	Down	si:dkey-48g21.7	_	molecular_function:molecular_function(GO:0003674);cellular_component:cellular_component(GO:0005575);biological_process:biological_process(GO:0008150)
ENSDART00000137216	ENSDARG00000078659	1:44234138-44239650	1.27988	3.38827	1.40454	2.00339	0.01125	0.0360653	Ups	tmem176	_	cellular_component:membrane(GO:0016020);cellular_component:integral component of membrane(GO:0016021)
ENSDART00000137248	ENSDARG00000090769	4:44340360-44348515	0.966193	0.206798	-2.22409	-2.21402	0.01215	0.0384954	Down	si:dkey-51d8.6	_	_
ENSDART00000137251	ENSDARG00000011613	11:24101745-24107807	3.98337	1.17473	-1.76166	-2.41099	0.00135	0.00560823	Down	rbm39a	_	molecular_function:nucleotide binding(GO:0000166);molecular_function:nucleic acid binding(GO:0003676);molecular_function:RNA binding(GO:0003723);cellular_component:nucleus(GO:0005634);biological_process:mRNA processing(GO:0006397)
ENSDART00000137275	ENSDARG00000093656	13:44690444-44694168	0.802013	1.78891	1.15739	2.13231	0.0104	0.0336533	Ups	si:dkeyp-2e4.6	_	molecular_function:nucleic acid binding(GO:0003676);molecular_function:metal ion binding(GO:0046872)
ENSDART00000137426	ENSDARG00000040907	9:51616719-51745410	2.59582	5.594	1.10769	2.09304	0.0084	0.027989	Ups	gcgb	K05259	molecular_function:hormone activity(GO:0005179);cellular_component:extracellular region(GO:0005576)
ENSDART00000137534	ENSDARG00000077768	5:65633203-65661549	2.32034	0.819426	-1.50165	-1.94956	0.0145	0.0446691	Down	malt1	_	molecular_function:cysteine-type endopeptidase activity(GO:0004197);biological_process:proteolysis(GO:0006508);biological_process:positive regulation of NF-kappaB transcription factor activity(GO:0051092)
ENSDART00000137645	ENSDARG00000060361	8:22276375-22305724	1.11227	0.386438	-1.5252	-2.22179	0.00575	0.0201723	Down	cep104	K16458	_
ENSDART00000137765	ENSDARG00000058660	6:8130185-8156576	6.0281	2.73426	-1.14055	-2.53046	0.0019	0.00760463	Down	ilf3a	_	molecular_function:RNA binding(GO:0003723);molecular_function:double-stranded RNA binding(GO:0003725);biological_process:spermatogenesis(GO:0007283)
ENSDART00000137774	ENSDARG00000091930	5:8713679-8716786	1.04515	2.26593	1.11639	2.12681	0.00655	0.0225678	Ups	si:ch211-12e13.1	_	_
ENSDART00000137775	ENSDARG00000099242	4:59321031-59334653	0.72941	1.63016	1.16021	2.53444	0.00195	0.00777689	Ups	BX255935.1	_	_
ENSDART00000137778	ENSDARG00000032630	9:22994267-23081969	5.06635	19.4073	1.93758	5.43004	5e-05	0.000273814	Ups	neb	_	molecular_function:actin binding(GO:0003779);biological_process:muscle fiber development(GO:0048747)
ENSDART00000137874	ENSDARG00000015557	21:28710373-28757383	1.75094	6.99061	1.99729	2.46415	0.0002	0.000995331	Ups	zgc:100829	_	molecular_function:molecular_function(GO:0003674);cellular_component:cellular_component(GO:0005575);biological_process:biological_process(GO:0008150)
ENSDART00000137958	ENSDARG00000088245	4:32764184-33001761	0.283776	1.14085	2.00729	2.9899	0.00095	0.00410593	Ups	si:dkey-16p6.1	_	_
ENSDART00000138052	ENSDARG00000094518	9:33305331-33310841	3.57715	14.7504	2.04387	8.62229	5e-05	0.000273814	Ups	si:ch211-125e6.8	_	_
ENSDART00000138135	ENSDARG00000013685	8:6533391-6565740	2.27577	0.513357	-2.14832	-4.07164	5e-05	0.000273814	Down	vsig8b	_	cellular_component:plasma membrane(GO:0005886);cellular_component:cell-cell junction(GO:0005911);cellular_component:cell surface(GO:0009986);biological_process:single organismal cell-cell adhesion(GO:0016337)
ENSDART00000138161	ENSDARG00000069543	10:14305564-14530399	4.86746	2.23635	-1.12202	-5.06086	5e-05	0.000273814	Down	galt	K00965	molecular_function:catalytic activity(GO:0003824);cellular_component:cellular_component(GO:0005575);biological_process:carbohydrate metabolic process(GO:0005975);biological_process:galactose metabolic process(GO:0006012);molecular_function:UDP-glucose:hexose-1-phosphate uridylyltransferase activity(GO:0008108);molecular_function:zinc ion binding(GO:0008270);molecular_function:transferase activity…
ENSDART00000138304	ENSDARG00000095047	16:14065465-14075398	0.573674	1.28427	1.16265	2.07095	0.0143	0.0442091	Ups	si:dkey-85k15.4	_	_
ENSDART00000138364	ENSDARG00000069451	9:30619441-30622032	0.749706	2.53745	1.75898	2.36169	0.00445	0.0161639	Ups	cx50.5	_	cellular_component:plasma membrane(GO:0005886);cellular_component:gap junction(GO:0005921);cellular_component:connexon complex(GO:0005922);biological_process:cell communication(GO:0007154);cellular_component:membrane(GO:0016020);cellular_component:integral component of membrane(GO:0016021);cellular_component:cell junction(GO:0030054)
ENSDART00000138376	ENSDARG00000097938	14:36057967-36072192	0.275098	1.00058	1.86282	2.40372	0.0132	0.0413114	Ups	asb5a	_	molecular_function:molecular_function(GO:0003674);cellular_component:membrane(GO:0016020);cellular_component:integral component of membrane(GO:0016021);biological_process:protein ubiquitination(GO:0016567);biological_process:intracellular signal transduction(GO:0035556)
ENSDART00000138424	ENSDARG00000038731	2:39765644-39793420	2.95998	0.903331	-1.71226	-2.22104	0.01025	0.0332141	Down	slc25a36a	_	cellular_component:mitochondrion(GO:0005739);cellular_component:mitochondrial inner membrane(GO:0005743);biological_process:transport(GO:0006810);cellular_component:membrane(GO:0016020);cellular_component:integral component of membrane(GO:0016021);biological_process:transmembrane transport(GO:0055085)
ENSDART00000138563	ENSDARG00000026359	13:22713379-22731983	4.09154	8.3626	1.03131	3.33728	5e-05	0.000273814	Ups	pbld2	_	molecular_function:catalytic activity(GO:0003824);cellular_component:cellular_component(GO:0005575);biological_process:biosynthetic process(GO:0009058)
ENSDART00000138567	ENSDARG00000077038	6:46404684-46429715	1.35017	2.75058	1.02659	2.66791	0.0007	0.00311162	Ups	pbrm1l	K11757	molecular_function:chromatin binding(GO:0003682);biological_process:biological_process(GO:0008150)
ENSDART00000138595	ENSDARG00000093068	22:26109347-26216378	8.29137	1.37576	-2.59138	-12.1946	5e-05	0.000273814	Down	c3b.1	_	molecular_function:endopeptidase inhibitor activity(GO:0004866);cellular_component:extracellular region(GO:0005576);cellular_component:extracellular space(GO:0005615)
ENSDART00000138633	ENSDARG00000051975	1:32622829-32647456	3.04405	0.534149	-2.51068	-2.92524	0.00405	0.0148715	Down	cd99	_	molecular_function:molecular_function(GO:0003674);biological_process:biological_process(GO:0008150);cellular_component:membrane(GO:0016020);cellular_component:integral component of membrane(GO:0016021)
ENSDART00000138641	ENSDARG00000039652	20:52723476-53040695	3.79877	1.51971	-1.32173	-3.28591	5e-05	0.000273814	Down	si:dkey-235d18.5	_	molecular_function:calcium ion binding(GO:0005509);cellular_component:membrane(GO:0016020);cellular_component:integral component of membrane(GO:0016021)
ENSDART00000138661	ENSDARG00000001781	4:11174244-11199206	7.6178	3.74535	-1.02427	-4.28681	5e-05	0.000273814	Down	tspan11	K17352	cellular_component:integral component of plasma membrane(GO:0005887);biological_process:cell surface receptor signaling pathway(GO:0007166);cellular_component:membrane(GO:0016020);cellular_component:integral component of membrane(GO:0016021)
ENSDART00000138734	ENSDARG00000060113	17:16082226-16100451	8.22627	3.53981	-1.21657	-2.32814	0.00705	0.024065	Down	znf395a	_	biological_process:biological_process(GO:0008150);molecular_function:metal ion binding(GO:0046872)
ENSDART00000138770	ENSDARG00000095595	9:30294173-30297214	0	1.24463	inf	-nan	5e-05	0.000273814	Ups	si:ch211-283e2.7	_	_
ENSDART00000138824	ENSDARG00000101147	4:66047634-66049189	2.83466	0.46238	-2.61602	-5.4284	5e-05	0.000273814	Down	znf987	_	_
ENSDART00000139101	ENSDARG00000086658	9:22316748-22528713	0.480417	3.19526	2.73357	2.64433	0.0154	0.0470422	Ups	crygm2d21	_	_
ENSDART00000139128	ENSDARG00000071024	22:30553359-30625531	8.74901	3.25171	-1.42792	-6.54574	5e-05	0.000273814	Down	zgc:171679	_	molecular_function:molecular_function(GO:0003674);cellular_component:cellular_component(GO:0005575);biological_process:biological_process(GO:0008150)
ENSDART00000139286	ENSDARG00000092166	23:16962808-16991848	2.61392	5.88037	1.16969	2.23049	0.00475	0.0170781	Ups	si:dkey-147f3.8	_	_
ENSDART00000139292	ENSDARG00000092493	14:6308836-6319647	16.4879	55.3814	1.748	31.2974	5e-05	0.000273814	Ups	si:dkeyp-44a8.2	_	_
ENSDART00000139319	ENSDARG00000070340	23:35982621-36178306	4.02158	1.97662	-1.02473	-2.18673	0.00545	0.0192504	Down	hoxc5a	K09305	molecular_function:DNA binding(GO:0003677);molecular_function:sequence-specific DNA binding transcription factor activity(GO:0003700);cellular_component:nucleus(GO:0005634);biological_process:transcription, DNA-templated(GO:0006351);biological_process:regulation of transcription, DNA-templated(GO:0006355);biological_process:multicellular organismal development(GO:0007275);molecular_function:seque…
ENSDART00000139412	ENSDARG00000093064	1:22161005-22181535	1.57423	5.02595	1.67475	4.14571	5e-05	0.000273814	Ups	SMIM18	_	cellular_component:membrane(GO:0016020);cellular_component:integral component of membrane(GO:0016021);biological_process:electron transport chain(GO:0022900)
ENSDART00000139423	ENSDARG00000038069	3:25106850-25138203	0.300963	0.64491	1.09951	1.92595	0.0132	0.0413114	Ups	mgat3a	K00737	molecular_function:beta-1,4-mannosylglycoprotein 4-beta-N-acetylglucosaminyltransferase activity(GO:0003830);biological_process:protein N-linked glycosylation(GO:0006487);cellular_component:membrane(GO:0016020);molecular_function:transferase activity(GO:0016740);molecular_function:transferase activity, transferring glycosyl groups(GO:0016757)
ENSDART00000139449	ENSDARG00000092077	23:17021705-17026893	1.56389	4.69354	1.58554	3.38454	5e-05	0.000273814	Ups	si:dkey-147f3.4	_	_
ENSDART00000139591	ENSDARG00000031888	13:31017067-31036155	4.44313	2.09807	-1.08251	-3.65938	5e-05	0.000273814	Down	mapk8a	K04440	molecular_function:nucleotide binding(GO:0000166);molecular_function:protein kinase activity(GO:0004672);molecular_function:protein serine/threonine kinase activity(GO:0004674);molecular_function:MAP kinase activity(GO:0004707);molecular_function:ATP binding(GO:0005524);biological_process:protein phosphorylation(GO:0006468);cellular_component:membrane(GO:0016020);cellular_component:integral compo…
ENSDART00000139631	ENSDARG00000011573	9:49043038-49119634	0.256467	1.1757	2.19667	3.08301	0.0035	0.0130631	Ups	abcb11a	K05664	molecular_function:nucleotide binding(GO:0000166);molecular_function:ATP binding(GO:0005524);biological_process:transport(GO:0006810);cellular_component:membrane(GO:0016020);cellular_component:integral component of membrane(GO:0016021);cellular_component:integral component of membrane(GO:0016021);molecular_function:ATPase activity(GO:0016887);molecular_function:ATPase activity, coupled to transme…
ENSDART00000139690	ENSDARG00000034941	18:44753139-44772061	1.16916	0.377632	-1.63042	-3.05127	0.0005	0.00229906	Down	si:dkey-224e22.2	_	molecular_function:hydrolase activity, hydrolyzing O-glycosyl compounds(GO:0004553);molecular_function:beta-galactosidase activity(GO:0004565);molecular_function:beta-galactosidase activity(GO:0004565);cellular_component:vacuole(GO:0005773);biological_process:carbohydrate metabolic process(GO:0005975);biological_process:metabolic process(GO:0008152);molecular_function:hydrolase activity(GO:001678…
ENSDART00000139721	ENSDARG00000079271	12:3008563-3019149	3.57015	1.32199	-1.43328	-2.41478	0.0061	0.0212216	Down	dcxr	_	cellular_component:cellular_component(GO:0005575);molecular_function:oxidoreductase activity(GO:0016491)
ENSDART00000139724	ENSDARG00000093732	5:64991489-64995520	0.604213	0.154014	-1.97199	-2.94817	0.0064	0.0221138	Down	si:dkey-157g20.2	_	_
ENSDART00000139734	ENSDARG00000053484	13:37123107-37128887	4.85841	1.14191	-2.08904	-4.40148	5e-05	0.000273814	Down	syne2b	_	molecular_function:actin binding(GO:0003779);cellular_component:nuclear envelope(GO:0005635);cellular_component:membrane(GO:0016020);cellular_component:integral component of membrane(GO:0016021);cellular_component:LINC complex(GO:0034993);molecular_function:actin filament binding(GO:0051015);biological_process:cytoskeletal anchoring at nuclear membrane(GO:0090286)
ENSDART00000139760	ENSDARG00000002758	16:10950260-10972139	4.33679	1.91067	-1.18255	-2.41649	0.0023	0.00899296	Down	dedd1	_	biological_process:regulation of apoptotic process(GO:0042981)
ENSDART00000139868	ENSDARG00000009459	10:7942311-7954891	0.9693	0.291457	-1.73366	-3.04765	0.00125	0.00524587	Down	slc35e4	K15286	cellular_component:membrane(GO:0016020);cellular_component:integral component of membrane(GO:0016021)
ENSDART00000139929	ENSDARG00000030824	2:42570413-42643202	0.518094	1.76206	1.76597	3.55053	0.0001	0.0005238	Ups	esyt2a	_	molecular_function:lipid binding(GO:0008289);cellular_component:membrane(GO:0016020);cellular_component:integral component of membrane(GO:0016021);cellular_component:intrinsic component of endoplasmic reticulum membrane(GO:0031227);cellular_component:organelle membrane contact site(GO:0044232)
ENSDART00000139968	ENSDARG00000095489	8:24535097-24537947	0.593015	0	-inf	-nan	5e-05	0.000273814	Down	BX296549.5	_	_
ENSDART00000140007	ENSDARG00000093230	10:40865009-40897950	3.84206	1.17655	-1.70732	-4.17965	5e-05	0.000273814	Down	si:ch211-139n6.3	_	molecular_function:GTP binding(GO:0005525);cellular_component:cellular_component(GO:0005575);biological_process:biological_process(GO:0008150)
ENSDART00000140037	ENSDARG00000006527	21:18229682-18254342	19.1723	7.88557	-1.28174	-5.5964	5e-05	0.000273814	Down	brd3a	_	biological_process:thrombocyte differentiation(GO:0002574)
ENSDART00000140175	ENSDARG00000095522	16:22211395-22218204	1.33301	3.75362	1.49359	4.13238	5e-05	0.000273814	Ups	si:dkey-71b5.3	_	_
ENSDART00000140190	ENSDARG00000056938	4:16348179-16356251	9.47657	25.5646	1.43171	2.56162	0.0001	0.0005238	Ups	kera	_	cellular_component:proteinaceous extracellular matrix(GO:0005578);cellular_component:extracellular space(GO:0005615);biological_process:axonogenesis(GO:0007409)
ENSDART00000140272	ENSDARG00000095147	22:11726357-11749889	3.07487	10.0891	1.7142	6.0664	5e-05	0.000273814	Ups	krt96	_	molecular_function:structural molecule activity(GO:0005198);cellular_component:intermediate filament(GO:0005882)
ENSDART00000140362	ENSDARG00000045755	4:11031871-11065224	5.623	15.3046	1.44456	7.02148	5e-05	0.000273814	Ups	ccdc59	_	biological_process:maturation of SSU-rRNA from tricistronic rRNA transcript (SSU-rRNA, 5.8S rRNA, LSU-rRNA)(GO:0000462);cellular_component:nucleus(GO:0005634)
ENSDART00000140369	ENSDARG00000092553	14:32541310-32543824	3.6033	0.727921	-2.30747	-2.48966	0.0144	0.0444297	Down	slc25a5	_	molecular_function:transporter activity(GO:0005215);cellular_component:mitochondrial inner membrane(GO:0005743);biological_process:transport(GO:0006810);cellular_component:membrane(GO:0016020);cellular_component:integral component of membrane(GO:0016021);biological_process:transmembrane transport(GO:0055085)
ENSDART00000140395	ENSDARG00000095715	5:47458643-47524110	2.1837	4.90186	1.16655	2.08592	0.00325	0.0122479	Ups	si:ch211-202e12.3	_	_
ENSDART00000140440	ENSDARG00000067848	2:55766827-55879954	16.3115	6.57427	-1.31098	-6.19467	5e-05	0.000273814	Down	nmrk2	_	cellular_component:cellular_component(GO:0005575)
ENSDART00000140506	ENSDARG00000092875	2:59238554-59239737	0.646127	0	-inf	-nan	5e-05	0.000273814	Down	si:dkey-264b2.3	_	_
ENSDART00000140591	ENSDARG00000052690	5:48334349-48344444	4.03445	1.46647	-1.46002	-2.41492	0.006	0.0209232	Down	arrdc3a	_	molecular_function:molecular_function(GO:0003674);cellular_component:cellular_component(GO:0005575)
ENSDART00000140615	ENSDARG00000069074	8:21192978-21220597	17.3074	8.33155	-1.05473	-4.13028	5e-05	0.000273814	Down	cry1ba	_	biological_process:response to temperature stimulus(GO:0009266);biological_process:response to light stimulus(GO:0009416);biological_process:negative regulation of transcription, DNA-templated(GO:0045892)
ENSDART00000140745	ENSDARG00000005078	23:10789071-10810349	7.77477	2.10323	-1.88619	-2.5602	0.00495	0.0176788	Down	eif4e3	_	molecular_function:RNA binding(GO:0003723);molecular_function:translation initiation factor activity(GO:0003743);cellular_component:cytoplasm(GO:0005737);cellular_component:mRNA cap binding complex(GO:0005845);biological_process:translation(GO:0006412);biological_process:translational initiation(GO:0006413);biological_process:regulation of translation(GO:0006417)
ENSDART00000140799	ENSDARG00000039008	23:44470356-44884854	1.14897	15.1904	3.72475	7.90616	5e-05	0.000273814	Ups	zgc:85858	_	molecular_function:molecular_function(GO:0003674);cellular_component:endoplasmic reticulum(GO:0005783);cellular_component:endoplasmic reticulum(GO:0005783);biological_process:protein glycosylation(GO:0006486);cellular_component:membrane(GO:0016020);cellular_component:integral component of membrane(GO:0016021);biological_process:endoplasmic reticulum unfolded protein response(GO:0030968)
ENSDART00000140824	ENSDARG00000079501	1:49031535-49054672	5.38921	2.59901	-1.05211	-3.63679	5e-05	0.000273814	Down	si:ch211-149l1.2	_	_
ENSDART00000140863	ENSDARG00000094514	2:42505224-42510996	2.14658	5.00315	1.2208	5.14013	5e-05	0.000273814	Ups	si:dkey-7l6.3	_	molecular_function:nucleic acid binding(GO:0003676);molecular_function:metal ion binding(GO:0046872)
ENSDART00000140914	ENSDARG00000055080	7:22524925-22530091	1.58302	7.5522	2.25422	5.07134	5e-05	0.000273814	Ups	rbm4.2	_	molecular_function:nucleotide binding(GO:0000166);molecular_function:nucleic acid binding(GO:0003676);molecular_function:zinc ion binding(GO:0008270)
ENSDART00000140947	ENSDARG00000078654	23:32102042-32111690	7.96249	3.76125	-1.08201	-2.92283	0.00015	0.000764619	Down	tpx2	_	cellular_component:spindle(GO:0005819);cellular_component:microtubule(GO:0005874);biological_process:activation of protein kinase activity(GO:0032147);biological_process:regulation of mitotic spindle organization(GO:0060236)
ENSDART00000141048	ENSDARG00000055046	7:22386408-22392814	4.31566	9.32144	1.11097	3.73037	5e-05	0.000273814	Ups	ponzr5	_	_
ENSDART00000141085	ENSDARG00000079762	22:9841555-9848818	2.7659	0.491132	-2.49357	-3.25847	0.00225	0.00882464	Down	si:dkey-253d23.4	_	molecular_function:receptor binding(GO:0005102);biological_process:immune response(GO:0006955);cellular_component:cell surface(GO:0009986);cellular_component:membrane(GO:0016020);cellular_component:integral component of membrane(GO:0016021)
ENSDART00000141090	ENSDARG00000095724	8:23169746-23190398	3.26787	1.36777	-1.25653	-4.62372	5e-05	0.000273814	Down	si:ch211-196c10.15	_	_
ENSDART00000141105	ENSDARG00000056138	9:32350876-32366371	25.7403	11.0221	-1.22363	-2.78782	5e-05	0.000273814	Down	sf3b1	_	biological_process:neural crest cell development(GO:0014032);biological_process:melanocyte differentiation(GO:0030318);biological_process:melanocyte differentiation(GO:0030318);biological_process:regulation of apoptotic process(GO:0042981)
ENSDART00000141108	ENSDARG00000093236	4:52616711-52617820	0.154669	1.80652	3.54597	3.21556	0.0022	0.00865771	Ups	BX640461.1	_	_
ENSDART00000141267	ENSDARG00000056210	8:24948958-24951651	1.0161	0.460169	-1.1428	-2.46048	0.00185	0.00743006	Down	si:ch211-199o1.2	K03283	molecular_function:nucleotide binding(GO:0000166);molecular_function:ATP binding(GO:0005524)
ENSDART00000141283	ENSDARG00000002377	1:7837211-7847898	7.89223	3.34941	-1.23653	-2.83885	0.0007	0.00311162	Down	mief2	_	molecular_function:molecular_function(GO:0003674);cellular_component:cellular_component(GO:0005575);biological_process:biological_process(GO:0008150)
ENSDART00000141353	ENSDARG00000069433	7:26274296-26293591	3.7375	0.701005	-2.41458	-2.61578	0.00675	0.0231399	Down	tnk1	_	molecular_function:nucleotide binding(GO:0000166);molecular_function:protein kinase activity(GO:0004672);molecular_function:protein tyrosine kinase activity(GO:0004713);molecular_function:non-membrane spanning protein tyrosine kinase activity(GO:0004715);molecular_function:receptor binding(GO:0005102);molecular_function:ATP binding(GO:0005524);biological_process:protein phosphorylation(GO:0006468…
ENSDART00000141358	ENSDARG00000076838	2:42379322-42385143	103.757	237.4	1.19412	16.887	5e-05	0.000273814	Ups	apom	K17308	biological_process:regulation of immune system process(GO:0002682);cellular_component:extracellular space(GO:0005615);cellular_component:extracellular space(GO:0005615);biological_process:acute-phase response(GO:0006953);cellular_component:membrane(GO:0016020);cellular_component:integral component of membrane(GO:0016021)
ENSDART00000141388	ENSDARG00000069464	15:20467351-20470064	0	2.33609	inf	-nan	5e-05	0.000273814	Ups	cox7a1	_	molecular_function:cytochrome-c oxidase activity(GO:0004129);cellular_component:mitochondrial respiratory chain(GO:0005746);molecular_function:electron carrier activity(GO:0009055);cellular_component:membrane(GO:0016020);cellular_component:integral component of membrane(GO:0016021)
ENSDART00000141451	ENSDARG00000095067	13:33010828-33023439	1.03699	0.428012	-1.27668	-2.37254	0.00455	0.01648	Down	TC2N	K17287	_
ENSDART00000141461	ENSDARG00000013333	9:23929636-23936411	6.39762	12.9601	1.01847	2.22761	0.0006	0.00270717	Ups	ndufa10	_	cellular_component:mitochondrial matrix(GO:0005759)
ENSDART00000141473	ENSDARG00000061345	25:34243166-34299071	10.9251	4.28175	-1.35137	-3.98474	5e-05	0.000273814	Down	wwp2	_	molecular_function:ubiquitin-protein transferase activity(GO:0004842);cellular_component:nucleus(GO:0005634);cellular_component:nucleus(GO:0005634);cellular_component:cytoplasm(GO:0005737);molecular_function:UDP-N-acetylmuramoylalanyl-D-glutamyl-2,6-diaminopimelate-D-alanyl-D-alanine ligase activity(GO:0008766);biological_process:protein ubiquitination(GO:0016567);molecular_function:ligase activi…
ENSDART00000141521	ENSDARG00000040917	18:23005046-23083599	5.86669	1.57583	-1.89643	-2.94924	0.0027	0.0103597	Down	cbfb	_	molecular_function:RNA polymerase II transcription factor binding transcription factor activity(GO:0001076);molecular_function:DNA binding(GO:0003677);molecular_function:transcription cofactor activity(GO:0003712);molecular_function:transcription coactivator activity(GO:0003713);cellular_component:nucleus(GO:0005634);cellular_component:nucleus(GO:0005634);biological_process:regulation of transcri…
ENSDART00000141565	ENSDARG00000079703	9:30577169-30581999	0	1.71174	inf	-nan	5e-05	0.000273814	Ups	si:dkey-18p12.4	_	_
ENSDART00000141584	ENSDARG00000020164	9:26292944-26316436	10.4398	1.40898	-2.88938	-3.55775	0.00085	0.00371048	Down	efnb2a	_	biological_process:angiogenesis(GO:0001525);biological_process:blood vessel development(GO:0001568);biological_process:somitogenesis(GO:0001756);biological_process:somitogenesis(GO:0001756);biological_process:cell migration involved in sprouting angiogenesis(GO:0002042);biological_process:optic vesicle morphogenesis(GO:0003404);biological_process:optic vesicle morphogenesis(GO:0003404);cellular_c…
ENSDART00000141595	ENSDARG00000029157	20:2482458-2566952	6.53088	1.10754	-2.55992	-4.18212	5e-05	0.000273814	Down	med23	K15166	cellular_component:nucleus(GO:0005634);biological_process:transcription, DNA-templated(GO:0006351);biological_process:regulation of transcription, DNA-templated(GO:0006355);biological_process:negative regulation of neurogenesis(GO:0050768);biological_process:cardiovascular system development(GO:0072358)
ENSDART00000141596	ENSDARG00000016048	21:19264925-19280349	10.1334	4.70975	-1.1054	-8.86498	5e-05	0.000273814	Down	gpat3	K13506	molecular_function:1-acylglycerol-3-phosphate O-acyltransferase activity(GO:0003841);molecular_function:glycerol-3-phosphate O-acyltransferase activity(GO:0004366);cellular_component:endoplasmic reticulum(GO:0005783);cellular_component:endoplasmic reticulum membrane(GO:0005789);biological_process:lipid metabolic process(GO:0006629);biological_process:metabolic process(GO:0008152);biological_proce…
ENSDART00000141697	ENSDARG00000018266	20:27747681-27784154	0.834617	2.27289	1.44534	6.29648	5e-05	0.000273814	Ups	mthfd1a	_	molecular_function:catalytic activity(GO:0003824);molecular_function:formate-tetrahydrofolate ligase activity(GO:0004329);molecular_function:formate-tetrahydrofolate ligase activity(GO:0004329);molecular_function:methenyltetrahydrofolate cyclohydrolase activity(GO:0004477);molecular_function:methylenetetrahydrofolate dehydrogenase (NADP+) activity(GO:0004488);molecular_function:methylenetetrahydr…
ENSDART00000141714	ENSDARG00000094557	3:15355474-15356358	8.28883	20.4537	1.30313	6.22031	5e-05	0.000273814	Ups	nupr1	K15626	molecular_function:chromatin binding(GO:0003682);cellular_component:nucleus(GO:0005634);biological_process:regulation of transcription from RNA polymerase II promoter(GO:0006357);biological_process:cellular response to starvation(GO:0009267);biological_process:cellular response to estrogen stimulus(GO:0071391);biological_process:cellular response to pH(GO:0071467);biological_process:cellular resp…
ENSDART00000141788	ENSDARG00000054748	15:31307274-31356654	2.62151	6.01747	1.19876	2.40693	0.00385	0.0142212	Ups	cuedc1b	_	molecular_function:molecular_function(GO:0003674);cellular_component:cellular_component(GO:0005575);biological_process:biological_process(GO:0008150)
ENSDART00000141892	ENSDARG00000070055	1:24751869-24795742	4.85448	1.78722	-1.4416	-4.40933	5e-05	0.000273814	Down	arfip1	K20314	cellular_component:Golgi membrane(GO:0000139);cellular_component:cytoplasm(GO:0005737);molecular_function:protein domain specific binding(GO:0019904);cellular_component:trans-Golgi network membrane(GO:0032588);biological_process:regulation of Arp2/3 complex-mediated actin nucleation(GO:0034315);biological_process:regulation of protein secretion(GO:0050708);molecular_function:phosphatidylinositol-…
ENSDART00000141904	ENSDARG00000088711	3:28808782-28829415	15.7949	31.84	1.01138	5.4342	5e-05	0.000273814	Ups	lgals1l1	_	cellular_component:cellular_component(GO:0005575);biological_process:biological_process(GO:0008150);molecular_function:galactoside binding(GO:0016936);molecular_function:carbohydrate binding(GO:0030246)
ENSDART00000141921	ENSDARG00000017748	2:15459827-15529330	1.66585	3.54008	1.08753	4.03994	5e-05	0.000273814	Ups	arhgap29b	K20644	molecular_function:GTPase activator activity(GO:0005096);biological_process:signal transduction(GO:0007165);biological_process:intracellular signal transduction(GO:0035556);molecular_function:metal ion binding(GO:0046872)
ENSDART00000141928	ENSDARG00000004452	23:29431248-29436304	32.537	9.78578	-1.73332	-4.443	5e-05	0.000273814	Down	tardbpl	_	molecular_function:nucleotide binding(GO:0000166);molecular_function:nucleic acid binding(GO:0003676);biological_process:axonogenesis(GO:0007409);biological_process:locomotory behavior(GO:0007626)
ENSDART00000141973	ENSDARG00000016706	1:4739584-4845260	24.5296	49.3837	1.00952	5.27059	5e-05	0.000273814	Ups	atic	_	molecular_function:catalytic activity(GO:0003824);molecular_function:IMP cyclohydrolase activity(GO:0003937);molecular_function:phosphoribosylaminoimidazolecarboxamide formyltransferase activity(GO:0004643);biological_process:purine nucleotide biosynthetic process(GO:0006164)
ENSDART00000142036	ENSDARG00000059398	18:5552072-5567123	4.3432	1.41748	-1.61543	-1.80831	0.0116	0.0370132	Down	myef2	_	molecular_function:nucleotide binding(GO:0000166);molecular_function:nucleic acid binding(GO:0003676);cellular_component:cellular_component(GO:0005575);biological_process:definitive hemopoiesis(GO:0060216)
ENSDART00000142072	ENSDARG00000025581	23:19786213-19789516	16.398	7.63251	-1.10329	-2.97369	5e-05	0.000273814	Down	rpl10	K02866	biological_process:ribosomal large subunit assembly(GO:0000027);molecular_function:structural constituent of ribosome(GO:0003735);molecular_function:structural constituent of ribosome(GO:0003735);cellular_component:intracellular(GO:0005622);cellular_component:ribosome(GO:0005840);biological_process:translation(GO:0006412);biological_process:translation(GO:0006412);biological_process:brain develop…
ENSDART00000142182	ENSDARG00000055903	24:39750668-39766285	8.51452	3.8039	-1.16245	-2.66283	5e-05	0.000273814	Down	luc7l	_	molecular_function:mRNA binding(GO:0003729);molecular_function:mRNA binding(GO:0003729);cellular_component:U1 snRNP(GO:0005685);cellular_component:U1 snRNP(GO:0005685);biological_process:mRNA splice site selection(GO:0006376);biological_process:mRNA splice site selection(GO:0006376);cellular_component:U2-type prespliceosome(GO:0071004)
ENSDART00000142253	ENSDARG00000056059	12:18886051-18906194	2.29138	5.36181	1.22651	2.64018	0.0014	0.00578668	Ups	rangap1b	_	molecular_function:GTPase activator activity(GO:0005096);biological_process:signal transduction(GO:0007165)
ENSDART00000142320	ENSDARG00000074955	21:40331227-40375086	4.76702	13.4099	1.49214	2.92025	0.0003	0.00143914	Ups	nup98	_	biological_process:posttranscriptional tethering of RNA polymerase II gene DNA at nuclear periphery(GO:0000973);molecular_function:RNA binding(GO:0003723);molecular_function:nucleocytoplasmic transporter activity(GO:0005487);cellular_component:nuclear pore(GO:0005643);biological_process:RNA export from nucleus(GO:0006405);biological_process:protein import into nucleus(GO:0006606);biological_proce…
ENSDART00000142352	ENSDARG00000100683	22:6697419-6698068	1.10161	0	-inf	-nan	5e-05	0.000273814	Down	CT583625.5	_	_
ENSDART00000142488	ENSDARG00000062943	12:9267988-9277959	0.556083	11.6887	4.39367	9.4951	5e-05	0.000273814	Ups	taco1	K18189	cellular_component:mitochondrion(GO:0005739)
ENSDART00000142607	ENSDARG00000068415	8:30912166-31044640	1.48553	5.64103	1.92498	2.41766	0.0091	0.0299392	Ups	ptgesl	_	cellular_component:Golgi membrane(GO:0000139);biological_process:prostaglandin biosynthetic process(GO:0001516);cellular_component:Golgi apparatus(GO:0005794);biological_process:lipid metabolic process(GO:0006629);biological_process:fatty acid metabolic process(GO:0006631);biological_process:fatty acid biosynthetic process(GO:0006633);biological_process:prostaglandin metabolic process(GO:0006693)…
ENSDART00000142677	ENSDARG00000004296	10:10843325-10865634	8.39226	1.6586	-2.33909	-2.55947	0.0045	0.0163243	Down	ambp	_	molecular_function:serine-type endopeptidase inhibitor activity(GO:0004867);cellular_component:extracellular region(GO:0005576);molecular_function:small molecule binding(GO:0036094)
ENSDART00000142855	ENSDARG00000006939	5:41680218-41697180	1.49319	3.30062	1.14434	5.64017	5e-05	0.000273814	Ups	tbx6l	_	molecular_function:DNA binding(GO:0003677);molecular_function:sequence-specific DNA binding transcription factor activity(GO:0003700);cellular_component:nucleus(GO:0005634);biological_process:transcription, DNA-templated(GO:0006351);biological_process:regulation of transcription, DNA-templated(GO:0006355)
ENSDART00000142881	ENSDARG00000056001	10:33951450-34054277	0.706293	0.1784	-1.98515	-3.05234	0.00055	0.00250382	Down	fryb	_	biological_process:cell morphogenesis(GO:0000902);cellular_component:cell cortex(GO:0005938);cellular_component:site of polarized growth(GO:0030427);biological_process:neuron projection development(GO:0031175);biological_process:actin filament reorganization(GO:0090527)
ENSDART00000142884	ENSDARG00000010680	3:22962213-22965593	2.32156	4.82248	1.05468	2.29536	0.00345	0.0129041	Ups	gngt2a	K04549	molecular_function:signal transducer activity(GO:0004871);cellular_component:heterotrimeric G-protein complex(GO:0005834);cellular_component:plasma membrane(GO:0005886);biological_process:signal transduction(GO:0007165);biological_process:G-protein coupled receptor signaling pathway(GO:0007186);cellular_component:membrane(GO:0016020)
ENSDART00000142957	ENSDARG00000069415	1:48923914-48961434	0.821807	3.87525	2.23742	11.1924	5e-05	0.000273814	Ups	col17a1a	_	cellular_component:extracellular region(GO:0005576);cellular_component:proteinaceous extracellular matrix(GO:0005578);biological_process:epidermis development(GO:0008544);cellular_component:membrane(GO:0016020);cellular_component:integral component of membrane(GO:0016021)
ENSDART00000142960	ENSDARG00000035324	5:36299537-36324359	12.0623	2.6644	-2.17862	-4.58024	5e-05	0.000273814	Down	hnrpl	_	molecular_function:nucleotide binding(GO:0000166);molecular_function:nucleic acid binding(GO:0003676);molecular_function:RNA binding(GO:0003723);cellular_component:nucleus(GO:0005634);biological_process:mRNA processing(GO:0006397)
ENSDART00000142971	ENSDARG00000037415	24:9022125-9127662	1.35536	0.632313	-1.09997	-2.70219	0.00065	0.00291114	Down	dlgap1b	_	biological_process:synaptic transmission(GO:0007268);biological_process:signaling(GO:0023052);cellular_component:synapse(GO:0045202)
ENSDART00000143048	ENSDARG00000053535	1:33633276-33718216	1.29826	0.201739	-2.68602	-3.03362	0.00125	0.00524587	Down	lmo7b	_	biological_process:heart looping(GO:0001947);cellular_component:cellular_component(GO:0005575);biological_process:heart development(GO:0007507);molecular_function:zinc ion binding(GO:0008270);biological_process:regulation of signaling(GO:0023051);biological_process:regulation of cell adhesion(GO:0030155);molecular_function:metal ion binding(GO:0046872)
ENSDART00000143151	ENSDARG00000014592	21:8334453-8376608	5.09768	2.21913	-1.19985	-4.01904	5e-05	0.000273814	Down	si:dkey-261o10.2	_	_
ENSDART00000143200	ENSDARG00000079840	13:16390975-16758119	1.27576	0.29544	-2.11041	-2.26598	0.0153	0.0467828	Down	kcnma1a	K04936	biological_process:potassium ion transport(GO:0006813);biological_process:response to auditory stimulus(GO:0010996);molecular_function:calcium-activated potassium channel activity(GO:0015269);cellular_component:membrane(GO:0016020);cellular_component:integral component of membrane(GO:0016021)
ENSDART00000143204	ENSDARG00000095351	8:44347084-44351323	0.37141	2.1539	2.53587	2.66208	0.0077	0.0259789	Ups	si:ch73-308b14.1	_	_
ENSDART00000143206	ENSDARG00000079199	23:21193040-21288969	0.971385	0.453208	-1.09987	-2.76314	5e-05	0.000273814	Down	megf6a	_	molecular_function:calcium ion binding(GO:0005509)
ENSDART00000143238	ENSDARG00000038064	17:43478193-43485742	6.84296	1.25401	-2.44807	-2.94361	0.00085	0.00371048	Down	chmp3	_	molecular_function:molecular_function(GO:0003674);cellular_component:cytoplasm(GO:0005737);cellular_component:endosome(GO:0005768);cellular_component:cytosol(GO:0005829);biological_process:transport(GO:0006810);biological_process:vacuolar transport(GO:0007034);biological_process:protein transport(GO:0015031);cellular_component:membrane(GO:0016020);cellular_component:late endosome membrane(GO:0031…
ENSDART00000143274	ENSDARG00000093189	9:32934341-32937048	0.417247	1.2983	1.63765	2.29058	0.0136	0.0423828	Ups	si:ch211-165b19.11	_	_
ENSDART00000143338	ENSDARG00000019986	1:19142865-19152602	2.74557	0.223932	-3.61597	-3.49051	0.00655	0.0225678	Down	grhprb	_	cellular_component:cytosol(GO:0005829);biological_process:metabolic process(GO:0008152);molecular_function:oxidoreductase activity(GO:0016491);molecular_function:oxidoreductase activity, acting on the CH-OH group of donors, NAD or NADP as acceptor(GO:0016616);molecular_function:hydroxypyruvate reductase activity(GO:0016618);molecular_function:glyoxylate reductase (NADP) activity(GO:0030267);molec…
ENSDART00000143399	ENSDARG00000092799	23:44470356-44884854	0.316046	1.89259	2.58216	2.40848	0.0084	0.027989	Ups	camta2	_	molecular_function:DNA binding(GO:0003677);cellular_component:nucleus(GO:0005634)
ENSDART00000143429	ENSDARG00000060435	16:38327306-38349612	1.4175	3.25757	1.20044	2.23704	0.00595	0.0207748	Ups	bnipl	_	cellular_component:cytosol(GO:0005829);biological_process:apoptotic process(GO:0006915);molecular_function:identical protein binding(GO:0042802)
ENSDART00000143456	ENSDARG00000039820	13:4096676-4175145	9.58446	20.9101	1.12543	3.97492	5e-05	0.000273814	Ups	mea1	_	biological_process:spermatogenesis(GO:0007283)
ENSDART00000143481	ENSDARG00000076364	23:11929239-12080052	0.360084	3.91066	3.44101	5.55742	5e-05	0.000273814	Ups	EPB41L1	_	_
ENSDART00000143562	ENSDARG00000038669	2:42155796-42167864	1.77552	6.46155	1.86364	8.77901	5e-05	0.000273814	Ups	gbp2	K20899	molecular_function:nucleotide binding(GO:0000166);molecular_function:GTPase activity(GO:0003924);molecular_function:GTP binding(GO:0005525)
ENSDART00000143573	ENSDARG00000035285	5:41278098-41396362	0.245372	0.6273	1.35418	1.91448	0.01455	0.0448034	Ups	ncor1	K04650	biological_process:negative regulation of transcription from RNA polymerase II promoter(GO:0000122);molecular_function:DNA binding(GO:0003677);molecular_function:transcription corepressor activity(GO:0003714);cellular_component:nucleus(GO:0005634);biological_process:anterior/posterior pattern specification(GO:0009952);cellular_component:Sin3 complex(GO:0016580);molecular_function:ligand-dependent…
ENSDART00000143583	ENSDARG00000010515	23:29962547-30504802	3.12574	1.49118	-1.06774	-2.20095	0.00695	0.0237585	Down	dvl1a	_	_
ENSDART00000143587	ENSDARG00000058475	1:8485695-8511518	1.44374	0.65962	-1.1301	-3.48811	5e-05	0.000273814	Down	ern2	K08852	molecular_function:ribonuclease activity(GO:0004540);molecular_function:protein kinase activity(GO:0004672);molecular_function:ATP binding(GO:0005524);biological_process:mRNA processing(GO:0006397);biological_process:protein phosphorylation(GO:0006468)
ENSDART00000143645	ENSDARG00000086248	18:48520881-48522343	2.35521	1.01686	-1.21174	-2.99753	0.00055	0.00250382	Down	kcnj1a.3	_	molecular_function:inward rectifier potassium channel activity(GO:0005242);molecular_function:voltage-gated ion channel activity(GO:0005244);cellular_component:integral component of plasma membrane(GO:0005887);biological_process:transport(GO:0006810);biological_process:ion transport(GO:0006811);biological_process:potassium ion transport(GO:0006813);biological_process:potassium ion import(GO:00101…
ENSDART00000143749	ENSDARG00000019280	21:41005606-41047237	2.61253	8.57352	1.71444	3.94202	5e-05	0.000273814	Ups	larsb	_	molecular_function:nucleotide binding(GO:0000166);molecular_function:aminoacyl-tRNA editing activity(GO:0002161);molecular_function:aminoacyl-tRNA ligase activity(GO:0004812);molecular_function:leucine-tRNA ligase activity(GO:0004823);molecular_function:ATP binding(GO:0005524);cellular_component:cytosol(GO:0005829);biological_process:translation(GO:0006412);biological_process:tRNA aminoacylation …
ENSDART00000143751	ENSDARG00000059398	18:5552072-5567123	7.77835	0.775154	-3.32691	-3.83307	0.00135	0.00560823	Down	myef2	_	molecular_function:nucleotide binding(GO:0000166);molecular_function:nucleic acid binding(GO:0003676);cellular_component:cellular_component(GO:0005575);biological_process:definitive hemopoiesis(GO:0060216)
ENSDART00000143796	ENSDARG00000090716	15:17349966-17404176	5.25287	13.6293	1.37553	3.67371	5e-05	0.000273814	Ups	cltcb	_	molecular_function:structural molecule activity(GO:0005198);cellular_component:coated pit(GO:0005905);biological_process:intracellular protein transport(GO:0006886);cellular_component:membrane(GO:0016020);biological_process:vesicle-mediated transport(GO:0016192);cellular_component:clathrin coat of trans-Golgi network vesicle(GO:0030130);cellular_component:clathrin coat of coated pit(GO:0030132);c…
ENSDART00000143827	ENSDARG00000015937	5:36299537-36324359	2.29587	1.08606	-1.07994	-2.0116	0.01065	0.0343548	Down	kptn	_	molecular_function:actin binding(GO:0003779);biological_process:actin filament organization(GO:0007015);cellular_component:actin cytoskeleton(GO:0015629)
ENSDART00000143836	ENSDARG00000089441	16:22779820-22797802	7.86784	23.8869	1.60218	13.4479	5e-05	0.000273814	Ups	si:ch211-105c13.3	_	molecular_function:calcium ion binding(GO:0005509);molecular_function:metal ion binding(GO:0046872)
ENSDART00000143848	ENSDARG00000053446	10:8132443-8139399	11.7126	74.2412	2.66416	11.5356	5e-05	0.000273814	Ups	sub1a	_	molecular_function:DNA binding(GO:0003677);molecular_function:transcription coactivator activity(GO:0003713);biological_process:regulation of transcription, DNA-templated(GO:0006355)
ENSDART00000143850	ENSDARG00000092083	4:11781147-11781898	0	4.90415	inf	-nan	5e-05	0.000273814	Ups	si:dkey-115f9.1	_	_
ENSDART00000143934	ENSDARG00000039347	13:30085459-30104770	5.1647	2.18374	-1.24188	-2.6881	0.0014	0.00578668	Down	rps24	K02974	molecular_function:nucleotide binding(GO:0000166);biological_process:maturation of SSU-rRNA from tricistronic rRNA transcript (SSU-rRNA, 5.8S rRNA, LSU-rRNA)(GO:0000462);molecular_function:structural constituent of ribosome(GO:0003735);cellular_component:intracellular(GO:0005622);cellular_component:ribosome(GO:0005840);biological_process:translation(GO:0006412);cellular_component:cytosolic small …
ENSDART00000143999	ENSDARG00000068457	7:39173825-39189346	30.2708	62.5002	1.04593	3.63396	5e-05	0.000273814	Ups	tnnt3b	_	cellular_component:troponin complex(GO:0005861);biological_process:regulation of muscle contraction(GO:0006937);biological_process:regulation of striated muscle contraction(GO:0006942);biological_process:myofibril assembly(GO:0030239);biological_process:sarcomere organization(GO:0045214);biological_process:sarcomere organization(GO:0045214)
ENSDART00000144005	ENSDARG00000090600	22:8950272-8966655	0.920819	0.22838	-2.01148	-3.72963	5e-05	0.000273814	Down	si:ch211-213a13.1	_	_
ENSDART00000144054	ENSDARG00000093111	22:6541133-6674702	2.70612	0.928062	-1.54393	-2.46913	0.0094	0.030792	Down	si:ch211-209l18.2	_	cellular_component:membrane(GO:0016020);cellular_component:integral component of membrane(GO:0016021)
ENSDART00000144068	ENSDARG00000037199	9:900882-904718	5.75839	12.1143	1.07298	4.67434	5e-05	0.000273814	Ups	zgc:101851	_	molecular_function:molecular_function(GO:0003674);cellular_component:cellular_component(GO:0005575);biological_process:biological_process(GO:0008150)
ENSDART00000144069	ENSDARG00000034907	16:34568946-34578775	1.2144	0.504407	-1.26759	-1.91609	0.00855	0.0283973	Down	paqr7b	_	biological_process:activation of MAPK activity(GO:0000187);biological_process:oocyte maturation(GO:0001556);molecular_function:steroid hormone receptor activity(GO:0003707);molecular_function:steroid binding(GO:0005496);molecular_function:steroid binding(GO:0005496);molecular_function:steroid binding(GO:0005496);cellular_component:plasma membrane(GO:0005886);cellular_component:plasma membrane(GO:…
ENSDART00000144109	ENSDARG00000039069	13:35265776-35346699	1.00459	2.5939	1.36851	2.25082	0.00085	0.00371048	Ups	slx4ip	_	molecular_function:molecular_function(GO:0003674);cellular_component:cellular_component(GO:0005575);biological_process:biological_process(GO:0008150)
ENSDART00000144113	ENSDARG00000079456	19:1928644-1979455	0.285375	0.589227	1.04597	1.87609	0.0123	0.0389045	Ups	si:ch211-149a19.3	_	molecular_function:nucleotide binding(GO:0000166);molecular_function:ATP binding(GO:0005524)
ENSDART00000144153	ENSDARG00000053753	15:35368703-35394579	3.33371	1.48245	-1.16915	-1.88091	0.0093	0.0305145	Down	mff	_	biological_process:mitochondrial fission(GO:0000266);cellular_component:mitochondrion(GO:0005739);cellular_component:mitochondrial outer membrane(GO:0005741);cellular_component:peroxisome(GO:0005777);cellular_component:peroxisome(GO:0005777);cellular_component:membrane(GO:0016020);cellular_component:integral component of membrane(GO:0016021);molecular_function:protein homodimerization activity(GO…
ENSDART00000144226	ENSDARG00000011701	5:23802076-23805867	29.774	97.8604	1.71667	25.7431	5e-05	0.000273814	Ups	ctsll	_	molecular_function:cysteine-type endopeptidase activity(GO:0004197);cellular_component:extracellular space(GO:0005615);cellular_component:lysosome(GO:0005764);biological_process:proteolysis(GO:0006508);molecular_function:peptidase activity(GO:0008233);molecular_function:cysteine-type peptidase activity(GO:0008234);molecular_function:hydrolase activity(GO:0016787);biological_process:proteolysis in…
ENSDART00000144275	ENSDARG00000019426	19:42252950-42460233	1.93907	0.374039	-2.37411	-3.3571	5e-05	0.000273814	Down	trioa	K08810	molecular_function:nucleotide binding(GO:0000166);molecular_function:protein kinase activity(GO:0004672);molecular_function:protein serine/threonine kinase activity(GO:0004674);molecular_function:guanyl-nucleotide exchange factor activity(GO:0005085);molecular_function:Rho guanyl-nucleotide exchange factor activity(GO:0005089);molecular_function:ATP binding(GO:0005524);cellular_component:cytoplas…
ENSDART00000144327	ENSDARG00000030463	7:34958167-34970794	3.04366	0.74028	-2.03967	-3.52726	0.0003	0.00143914	Down	tppp3	_	biological_process:microtubule bundle formation(GO:0001578);cellular_component:cellular_component(GO:0005575);molecular_function:tubulin binding(GO:0015631);biological_process:microtubule polymerization(GO:0046785)
ENSDART00000144331	ENSDARG00000004988	21:28921739-29039116	2.38899	0.922365	-1.37299	-1.79392	0.0098	0.0319226	Down	ppp3ca	K04348	molecular_function:phosphoprotein phosphatase activity(GO:0004721);molecular_function:hydrolase activity(GO:0016787)
ENSDART00000144565	ENSDARG00000015678	1:9300128-9305551	4.97779	0	-inf	-nan	5e-05	0.000273814	Down	si:dkeyp-75b4.9	_	molecular_function:GTP binding(GO:0005525)
ENSDART00000144573	ENSDARG00000077388	9:41943047-41983030	1.07415	0.501211	-1.09971	-4.02628	5e-05	0.000273814	Down	obsl1b	K19574	molecular_function:molecular_function(GO:0003674);cellular_component:cellular_component(GO:0005575);biological_process:biological_process(GO:0008150)
ENSDART00000144602	ENSDARG00000093153	23:9372603-9373591	1.16425	0	-inf	-nan	5e-05	0.000273814	Down	si:ch73-268e11.2	_	_
ENSDART00000144736	ENSDARG00000071697	14:20621455-20703366	5.3487	1.93142	-1.46953	-2.17993	0.0073	0.0247971	Down	zgc:66433	_	molecular_function:molecular_function(GO:0003674);cellular_component:cellular_component(GO:0005575);biological_process:biological_process(GO:0008150)
ENSDART00000144759	ENSDARG00000091320	1:54089291-54107532	0.737331	0.335389	-1.13648	-2.93387	0.00025	0.0012226	Down	zgc:136791	_	molecular_function:nucleotide binding(GO:0000166);molecular_function:ATP binding(GO:0005524);cellular_component:cellular_component(GO:0005575);biological_process:biological_process(GO:0008150)
ENSDART00000144781	ENSDARG00000074071	14:16460338-16469534	1.70876	0.692641	-1.30277	-2.45323	0.00095	0.00410593	Down	zgc:123335	_	molecular_function:molecular_function(GO:0003674);cellular_component:cellular_component(GO:0005575);biological_process:biological_process(GO:0008150)
ENSDART00000144883	ENSDARG00000063344	24:20782715-20790247	10.6034	3.97745	-1.41461	-2.7026	0.00215	0.00848366	Down	fam162a	_	cellular_component:membrane(GO:0016020);cellular_component:integral component of membrane(GO:0016021)
ENSDART00000144970	ENSDARG00000077840	20:10111868-10133202	13.8457	30.5034	1.13954	3.76843	5e-05	0.000273814	Ups	meis2b	_	biological_process:heart looping(GO:0001947);molecular_function:DNA binding(GO:0003677);cellular_component:nucleus(GO:0005634);biological_process:regulation of transcription, DNA-templated(GO:0006355);biological_process:heart development(GO:0007507)
ENSDART00000145047	ENSDARG00000013022	22:7664592-7670333	0.619473	0	-inf	-nan	5e-05	0.000273814	Down	si:ch211-59h6.1	_	_
ENSDART00000145115	ENSDARG00000007863	19:20593563-20606487	9.64981	4.65798	-1.0508	-2.77068	0.0003	0.00143914	Down	tra2a	K12897	molecular_function:nucleotide binding(GO:0000166);molecular_function:nucleic acid binding(GO:0003676)
ENSDART00000145258	ENSDARG00000040705	9:41471443-41549567	1.56501	0.622224	-1.33067	-2.21674	0.01435	0.0443097	Down	glsb	K01425	molecular_function:glutaminase activity(GO:0004359);molecular_function:glutaminase activity(GO:0004359);cellular_component:mitochondrial matrix(GO:0005759);biological_process:glutamate biosynthetic process(GO:0006537);biological_process:glutamine metabolic process(GO:0006541);biological_process:glutamine catabolic process(GO:0006543)
ENSDART00000145269	ENSDARG00000069808	20:32575271-32588157	4.8535	2.01471	-1.26846	-9.01263	5e-05	0.000273814	Down	ostm1	_	cellular_component:membrane(GO:0016020);cellular_component:integral component of membrane(GO:0016021)
ENSDART00000145336	ENSDARG00000008796	14:30202693-30204352	2.26216	0.844357	-1.42177	-3.3018	5e-05	0.000273814	Down	her5	_	biological_process:negative regulation of transcription from RNA polymerase II promoter(GO:0000122);molecular_function:DNA binding(GO:0003677);molecular_function:sequence-specific DNA binding transcription factor activity(GO:0003700);molecular_function:protein binding(GO:0005515);cellular_component:nucleus(GO:0005634);cellular_component:nucleus(GO:0005634);biological_process:transcription, DNA-te…
ENSDART00000145428	ENSDARG00000045914	4:149699-340476	11.7593	29.5891	1.33126	4.84666	5e-05	0.000273814	Ups	si:ch211-51e12.7	_	molecular_function:molecular_function(GO:0003674);cellular_component:cellular_component(GO:0005575);biological_process:biological_process(GO:0008150)
ENSDART00000145557	ENSDARG00000092760	4:52283931-52290408	0.228417	1.14817	2.32959	3.28015	0.00095	0.00410593	Ups	BX936303.1	_	_
ENSDART00000145660	ENSDARG00000095451	18:25003735-25010115	1.81644	4.13723	1.18755	2.27533	0.00545	0.0192504	Ups	si:ch211-196l7.4	_	_
ENSDART00000145668	ENSDARG00000086256	17:8113685-8130159	1.87992	0.491746	-1.93469	-5.18797	5e-05	0.000273814	Down	si:ch211-236p5.2	_	molecular_function:nucleotide binding(GO:0000166);molecular_function:ATP binding(GO:0005524)
ENSDART00000145670	ENSDARG00000062116	2:21698179-21725335	9.07552	19.0356	1.06864	2.71103	5e-05	0.000273814	Ups	ctdsplb	_	molecular_function:phosphoprotein phosphatase activity(GO:0004721);cellular_component:cellular_component(GO:0005575);molecular_function:phosphatase activity(GO:0016791)
ENSDART00000145825	ENSDARG00000055115	16:25589076-25620398	2.61072	1.17357	-1.15354	-1.84157	0.01635	0.0495109	Down	dtnbp1a	_	cellular_component:nucleus(GO:0005634);cellular_component:cytoplasm(GO:0005737);cellular_component:endosome(GO:0005768);cellular_component:endoplasmic reticulum(GO:0005783);cellular_component:plasma membrane(GO:0005886);biological_process:anterograde axon cargo transport(GO:0008089);cellular_component:endosome membrane(GO:0010008);cellular_component:postsynaptic density(GO:0014069);cellular_compo…
ENSDART00000145837	ENSDARG00000091627	16:21324852-21334279	2.17803	5.09744	1.22675	2.41163	0.0011	0.0046704	Ups	si:dkey-271j15.3	_	_
ENSDART00000145843	ENSDARG00000091961	7:65912760-65913417	5.17798	0	-inf	-nan	5e-05	0.000273814	Down	pth1b	K05261	molecular_function:hormone activity(GO:0005179);molecular_function:hormone activity(GO:0005179);cellular_component:extracellular region(GO:0005576);cellular_component:extracellular region(GO:0005576);cellular_component:extracellular space(GO:0005615);biological_process:cellular calcium ion homeostasis(GO:0006874);biological_process:cell-cell signaling(GO:0007267);molecular_function:parathyroid ho…
ENSDART00000145909	ENSDARG00000079727	2:27739163-27745471	17.9003	3.24565	-2.4634	-4.16919	5e-05	0.000273814	Down	sepp1b	_	cellular_component:extracellular region(GO:0005576);cellular_component:membrane(GO:0016020);cellular_component:integral component of membrane(GO:0016021)
ENSDART00000145950	ENSDARG00000093282	1:34585326-34586182	0	2.09695	inf	-nan	0.0029	0.0110452	Ups	si:dkeyp-14c8.2	_	_
ENSDART00000145954	ENSDARG00000039682	20:7080754-7090591	2.93178	11.9655	2.02903	5.42132	5e-05	0.000273814	Ups	si:ch211-121a2.2	_	molecular_function:protein tyrosine phosphatase activity(GO:0004725);biological_process:protein dephosphorylation(GO:0006470);molecular_function:protein tyrosine/serine/threonine phosphatase activity(GO:0008138);biological_process:dephosphorylation(GO:0016311);molecular_function:phosphatase activity(GO:0016791)
ENSDART00000145958	ENSDARG00000093713	4:44506971-45111228	2.92833	0.725177	-2.01367	-1.99626	0.01335	0.0417061	Down	si:dkey-256i11.2	_	molecular_function:nucleic acid binding(GO:0003676);biological_process:biological_process(GO:0008150);molecular_function:metal ion binding(GO:0046872)
ENSDART00000146015	ENSDARG00000100277	4:32511833-32694252	0.503178	1.72537	1.77776	2.0291	0.01525	0.046681	Ups	BX571878.1	_	_
ENSDART00000146054	ENSDARG00000043453	15:40117890-40124704	7.11562	40.849	2.52124	4.66683	5e-05	0.000273814	Ups	rps5	K02989	biological_process:ribosomal small subunit assembly(GO:0000028);molecular_function:RNA binding(GO:0003723);molecular_function:mRNA binding(GO:0003729);molecular_function:structural constituent of ribosome(GO:0003735);molecular_function:structural constituent of ribosome(GO:0003735);cellular_component:ribosome(GO:0005840);biological_process:translation(GO:0006412);biological_process:translation(GO…
ENSDART00000146221	ENSDARG00000012140	2:36681715-36691548	1.89726	11.1636	2.55681	6.10286	5e-05	0.000273814	Ups	ccnl1b	_	biological_process:regulation of cyclin-dependent protein serine/threonine kinase activity(GO:0000079);cellular_component:cyclin-dependent protein kinase holoenzyme complex(GO:0000307);cellular_component:nucleus(GO:0005634);cellular_component:nucleus(GO:0005634);biological_process:transcription, DNA-templated(GO:0006351);biological_process:regulation of transcription, DNA-templated(GO:0006355);bi…
ENSDART00000146223	ENSDARG00000003592	5:32674996-32683565	1.03946	3.282	1.65874	1.70627	0.0155	0.0472701	Ups	surf1	_	molecular_function:cytochrome-c oxidase activity(GO:0004129);cellular_component:mitochondrion(GO:0005739);cellular_component:mitochondrial inner membrane(GO:0005743);cellular_component:membrane(GO:0016020);biological_process:spinal cord motor neuron differentiation(GO:0021522);biological_process:embryonic organ development(GO:0048568)
ENSDART00000146264	ENSDARG00000022768	8:23125978-23130745	1.54091	4.01379	1.38118	2.42302	0.00225	0.00882464	Ups	gid8a	_	molecular_function:molecular_function(GO:0003674);cellular_component:nucleus(GO:0005634);biological_process:biological_process(GO:0008150)
ENSDART00000146306	ENSDARG00000012534	8:7100517-7152381	0.763019	0.318266	-1.26148	-2.62657	0.0014	0.00578668	Down	slc6a6a	K05039	biological_process:amino acid transmembrane transport(GO:0003333);molecular_function:neurotransmitter:sodium symporter activity(GO:0005328);molecular_function:taurine:sodium symporter activity(GO:0005369);molecular_function:taurine:sodium symporter activity(GO:0005369);cellular_component:integral component of plasma membrane(GO:0005887);cellular_component:integral component of plasma membrane(GO:…
ENSDART00000146319	ENSDARG00000088823	9:22316748-22528713	2.17206	8.20052	1.91665	3.26074	5e-05	0.000273814	Ups	crygm2d3	_	_
ENSDART00000146368	ENSDARG00000055080	7:22524925-22530091	1.93868	5.26106	1.44028	1.98597	0.00425	0.0155181	Ups	rbm4.2	_	molecular_function:nucleotide binding(GO:0000166);molecular_function:nucleic acid binding(GO:0003676);molecular_function:zinc ion binding(GO:0008270)
ENSDART00000146370	ENSDARG00000016439	10:24452523-24524019	0.920502	0.349651	-1.3965	-2.09079	0.012	0.0381067	Down	slc7a1	K13863	molecular_function:L-ornithine transmembrane transporter activity(GO:0000064);biological_process:amino acid transmembrane transport(GO:0003333);cellular_component:integral component of plasma membrane(GO:0005887);biological_process:amino acid transport(GO:0006865);molecular_function:amino acid transmembrane transporter activity(GO:0015171);molecular_function:arginine transmembrane transporter act…
ENSDART00000146377	ENSDARG00000102771	4:31202373-31213027	0.755309	2.19758	1.54078	3.33291	0.00025	0.0012226	Ups	BX571711.1	_	_
ENSDART00000146397	ENSDARG00000022670	22:14026833-14090589	60.3477	22.2935	-1.43668	-4.6046	5e-05	0.000273814	Down	he2	_	molecular_function:metalloendopeptidase activity(GO:0004222);biological_process:proteolysis(GO:0006508);molecular_function:peptidase activity(GO:0008233);molecular_function:metallopeptidase activity(GO:0008237);molecular_function:zinc ion binding(GO:0008270);molecular_function:hydrolase activity(GO:0016787);molecular_function:metal ion binding(GO:0046872)
ENSDART00000146440	ENSDARG00000039211	7:26028660-26036965	3.52439	14.8532	2.07532	3.32051	0.0005	0.00229906	Ups	zgc:77439	_	molecular_function:monooxygenase activity(GO:0004497);molecular_function:monooxygenase activity(GO:0004497);molecular_function:N,N-dimethylaniline monooxygenase activity(GO:0004499);cellular_component:cellular_component(GO:0005575);molecular_function:N-ethylmaleimide reductase activity(GO:0008748);molecular_function:oxidoreductase activity(GO:0016491);molecular_function:reduced coenzyme F420 dehy…
ENSDART00000146461	ENSDARG00000015546	11:27672517-27803385	10.2754	4.56	-1.17209	-5.89461	5e-05	0.000273814	Down	alpl	K01077	molecular_function:catalytic activity(GO:0003824);molecular_function:alkaline phosphatase activity(GO:0004035);biological_process:metabolic process(GO:0008152);biological_process:response to mechanical stimulus(GO:0009612);cellular_component:membrane(GO:0016020);cellular_component:integral component of membrane(GO:0016021);molecular_function:hydrolase activity(GO:0016787);molecular_function:phosp…
ENSDART00000146471	ENSDARG00000077862	22:30497791-30508541	1.47175	0.135396	-3.44227	-3.47136	0.001	0.00429809	Down	si:dkey-169i5.4	_	cellular_component:membrane(GO:0016020);cellular_component:integral component of membrane(GO:0016021)
ENSDART00000146475	ENSDARG00000086775	23:2810968-2816423	0	0.720296	inf	-nan	0.0102	0.0330636	Ups	top1	_	molecular_function:DNA binding(GO:0003677);molecular_function:DNA topoisomerase type I activity(GO:0003917);molecular_function:DNA topoisomerase type I activity(GO:0003917);cellular_component:chromosome(GO:0005694);cellular_component:nucleolus(GO:0005730);biological_process:DNA replication(GO:0006260);biological_process:DNA topological change(GO:0006265);biological_process:DNA topological change(…
ENSDART00000146563	ENSDARG00000025108	8:22745216-22805757	0.808215	0.2986	-1.43652	-3.21426	0.00025	0.0012226	Down	magixa	_	_
ENSDART00000146595	ENSDARG00000092387	10:27028381-27035631	9.19691	19.0042	1.0471	3.62129	5e-05	0.000273814	Ups	zgc:193742	_	molecular_function:molecular_function(GO:0003674);biological_process:biological_process(GO:0008150);cellular_component:membrane(GO:0016020);cellular_component:integral component of membrane(GO:0016021)
ENSDART00000146610	ENSDARG00000094854	4:75032056-75142798	1.69093	5.30592	1.64978	3.79275	5e-05	0.000273814	Ups	ms4a17a.8	_	cellular_component:membrane(GO:0016020);cellular_component:integral component of membrane(GO:0016021)
ENSDART00000146648	ENSDARG00000051975	1:32622829-32647456	6.61959	1.77904	-1.89564	-3.89192	5e-05	0.000273814	Down	cd99	_	molecular_function:molecular_function(GO:0003674);biological_process:biological_process(GO:0008150);cellular_component:membrane(GO:0016020);cellular_component:integral component of membrane(GO:0016021)
ENSDART00000146708	ENSDARG00000012389	16:23616550-23642682	2.81834	6.11047	1.11644	3.02101	5e-05	0.000273814	Ups	adar	K12968	molecular_function:RNA binding(GO:0003723);molecular_function:double-stranded RNA adenosine deaminase activity(GO:0003726);molecular_function:adenosine deaminase activity(GO:0004000);biological_process:RNA processing(GO:0006396)
ENSDART00000146840	ENSDARG00000039887	5:3590949-3604310	4.64438	1.41633	-1.71332	-2.77661	0.00065	0.00291114	Down	c1qbp	K15414	molecular_function:molecular_function(GO:0003674);cellular_component:mitochondrial matrix(GO:0005759);biological_process:biological_process(GO:0008150)
ENSDART00000146963	ENSDARG00000014463	5:29203226-29217695	6.44984	16.8176	1.38264	2.65237	0.00195	0.00777689	Ups	usf1l	_	molecular_function:protein dimerization activity(GO:0046983)
ENSDART00000146999	ENSDARG00000036316	14:32991458-32993751	4.32545	2.06839	-1.06434	-2.35993	0.00155	0.00634657	Down	rpl39	_	molecular_function:RNA binding(GO:0003723);molecular_function:structural constituent of ribosome(GO:0003735);molecular_function:structural constituent of ribosome(GO:0003735);cellular_component:intracellular(GO:0005622);cellular_component:ribosome(GO:0005840);biological_process:translation(GO:0006412);biological_process:translation(GO:0006412);cellular_component:cytosolic large ribosomal subunit(…
ENSDART00000147003	ENSDARG00000094946	18:40582101-40592912	1.91763	0.440068	-2.12352	-4.50653	5e-05	0.000273814	Down	si:ch211-132b12.2	K05039	molecular_function:neurotransmitter:sodium symporter activity(GO:0005328);molecular_function:gamma-aminobutyric acid:sodium symporter activity(GO:0005332);cellular_component:integral component of plasma membrane(GO:0005887);biological_process:transport(GO:0006810);biological_process:neurotransmitter transport(GO:0006836);biological_process:neurotransmitter transport(GO:0006836);biological_process…
ENSDART00000147022	ENSDARG00000056030	3:23561298-23565660	6.37948	3.04455	-1.06721	-2.37366	0.0031	0.0117349	Down	hoxb7a	_	molecular_function:DNA binding(GO:0003677);molecular_function:sequence-specific DNA binding transcription factor activity(GO:0003700);cellular_component:nucleus(GO:0005634);biological_process:transcription, DNA-templated(GO:0006351);biological_process:regulation of transcription, DNA-templated(GO:0006355);biological_process:multicellular organismal development(GO:0007275);molecular_function:seque…
ENSDART00000147112	ENSDARG00000092873	20:20826557-20830541	332.755	110.643	-1.58856	-20.7005	5e-05	0.000273814	Down	zgc:193541	K18193	molecular_function:molecular_function(GO:0003674);cellular_component:mitochondrion(GO:0005739);biological_process:biological_process(GO:0008150);cellular_component:membrane(GO:0016020);cellular_component:integral component of membrane(GO:0016021)
ENSDART00000147174	ENSDARG00000070757	20:10736051-10743231	0	0.829808	inf	-nan	5e-05	0.000273814	Ups	si:ch211-182e10.4	_	_
ENSDART00000147220	ENSDARG00000029018	4:18603766-18606549	1.6801	0.474068	-1.82538	-2.07673	0.0158	0.0480748	Down	cdkn1ba	_	molecular_function:cyclin-dependent protein serine/threonine kinase inhibitor activity(GO:0004861);cellular_component:nucleus(GO:0005634);cellular_component:cytoplasm(GO:0005737);biological_process:cell cycle arrest(GO:0007050);biological_process:regulation of cell proliferation(GO:0042127)
ENSDART00000147252	ENSDARG00000053091	5:43261195-43334966	3.01965	0.983925	-1.61776	-2.58617	0.0053	0.0187633	Down	DAB2	_	cellular_component:transcription factor TFIIIB complex(GO:0000126);molecular_function:TFIIIB-type transcription factor activity(GO:0001026);molecular_function:DNA binding(GO:0003677);biological_process:regulation of transcription from RNA polymerase III promoter(GO:0006359)
ENSDART00000147483	ENSDARG00000057729	16:12444371-12579132	1.52127	0.666122	-1.19142	-4.23736	5e-05	0.000273814	Down	ephb6	_	molecular_function:nucleotide binding(GO:0000166);molecular_function:protein kinase activity(GO:0004672);molecular_function:protein tyrosine kinase activity(GO:0004713);molecular_function:transmembrane receptor protein tyrosine kinase activity(GO:0004714);molecular_function:ephrin receptor activity(GO:0005003);molecular_function:ATP binding(GO:0005524);cellular_component:integral component of pla…
ENSDART00000147496	ENSDARG00000021343	15:31281041-31296583	25.8115	11.4587	-1.17156	-4.28654	5e-05	0.000273814	Down	wsb1	_	biological_process:protein ubiquitination(GO:0016567);biological_process:intracellular signal transduction(GO:0035556)
ENSDART00000147502	ENSDARG00000019986	1:19142865-19152602	19.8151	41.3846	1.06249	11.2568	5e-05	0.000273814	Ups	grhprb	K00049	cellular_component:cytosol(GO:0005829);biological_process:metabolic process(GO:0008152);molecular_function:oxidoreductase activity(GO:0016491);molecular_function:oxidoreductase activity, acting on the CH-OH group of donors, NAD or NADP as acceptor(GO:0016616);molecular_function:hydroxypyruvate reductase activity(GO:0016618);molecular_function:glyoxylate reductase (NADP) activity(GO:0030267);molec…
ENSDART00000147520	ENSDARG00000043323	20:22766859-22899121	2.29576	0.561978	-2.03039	-4.45737	5e-05	0.000273814	Down	lnx1	K10692	molecular_function:zinc ion binding(GO:0008270);molecular_function:metal ion binding(GO:0046872)
ENSDART00000147552	ENSDARG00000094422	24:11194365-11206504	0.636966	3.13268	2.29811	3.92988	5e-05	0.000273814	Ups	si:dkey-12l12.1	_	cellular_component:membrane(GO:0016020);cellular_component:integral component of membrane(GO:0016021)
ENSDART00000147573	ENSDARG00000098960	4:70151514-70160994	1.87531	5.00469	1.41615	4.0565	5e-05	0.000273814	Ups	CABZ01051641.2	_	_
ENSDART00000147788	ENSDARG00000062023	24:26608386-26744163	3.22054	0.764603	-2.07452	-3.74341	5e-05	0.000273814	Down	fndc3bb	_	cellular_component:membrane(GO:0016020);cellular_component:integral component of membrane(GO:0016021)
ENSDART00000147790	ENSDARG00000079850	10:26307358-26468302	0.695315	1.50946	1.11829	2.08645	0.01405	0.0435809	Ups	dchs1b	_	biological_process:microtubule cytoskeleton organization(GO:0000226);molecular_function:calcium ion binding(GO:0005509);cellular_component:plasma membrane(GO:0005886);biological_process:cell adhesion(GO:0007155);biological_process:homophilic cell adhesion via plasma membrane adhesion molecules(GO:0007156);biological_process:egg activation(GO:0007343);cellular_component:membrane(GO:0016020);cellul…
ENSDART00000147818	ENSDARG00000095698	19:42989705-43038014	3.00424	6.76955	1.17206	2.84145	5e-05	0.000273814	Ups	si:dkey-228a15.1	_	molecular_function:cysteine-type peptidase activity(GO:0008234)
ENSDART00000147823	ENSDARG00000039378	18:26948577-26995562	0.927698	1.86684	1.00887	2.15609	0.00635	0.0219763	Ups	rcn2	_	molecular_function:calcium ion binding(GO:0005509)
ENSDART00000147851	ENSDARG00000044521	6:12967026-12972720	3.19042	13.6662	2.09879	5.101	5e-05	0.000273814	Ups	eef1b2	_	molecular_function:translation elongation factor activity(GO:0003746);cellular_component:eukaryotic translation elongation factor 1 complex(GO:0005853);biological_process:translation(GO:0006412);biological_process:translational elongation(GO:0006414)
ENSDART00000147904	ENSDARG00000033852	1:9055258-9174410	0.88548	4.52128	2.3522	5.74805	5e-05	0.000273814	Ups	mad1l1	K06638	cellular_component:kinetochore(GO:0000776);molecular_function:molecular_function(GO:0003674);cellular_component:nuclear envelope(GO:0005635);biological_process:mitotic spindle assembly checkpoint(GO:0007094);biological_process:mitotic spindle assembly checkpoint(GO:0007094);biological_process:attachment of mitotic spindle microtubules to kinetochore(GO:0051315);cellular_component:mitotic spindle(…
ENSDART00000147943	ENSDARG00000034677	9:17298449-17326946	2.18622	6.61036	1.59629	3.16053	0.0003	0.00143914	Ups	scel	_	molecular_function:zinc ion binding(GO:0008270);molecular_function:metal ion binding(GO:0046872)
ENSDART00000148116	ENSDARG00000093821	5:66589740-66596137	0.94707	2.3688	1.32261	4.254	5e-05	0.000273814	Ups	si:ch211-110p13.9	_	_
ENSDART00000148161	ENSDARG00000001767	21:27240989-27376599	0.733137	5.76483	2.97512	9.84201	5e-05	0.000273814	Ups	slc29a2	_	molecular_function:nucleoside transmembrane transporter activity(GO:0005337);cellular_component:integral component of plasma membrane(GO:0005887);biological_process:transport(GO:0006810);biological_process:nucleoside transport(GO:0015858);cellular_component:membrane(GO:0016020);cellular_component:integral component of membrane(GO:0016021)
ENSDART00000148182	ENSDARG00000094206	1:8294796-8296554	0	1.19036	inf	-nan	5e-05	0.000273814	Ups	si:ch73-191k20.3	_	_
ENSDART00000148231	ENSDARG00000069031	21:40993681-41002293	1.30652	4.68657	1.84281	4.15897	5e-05	0.000273814	Ups	plac8l1	_	_
ENSDART00000148233	ENSDARG00000104015	22:6939630-6961668	1.66744	5.08284	1.608	7.1604	5e-05	0.000273814	Ups	fgfr1bl	_	_
ENSDART00000148240	ENSDARG00000058180	13:7055619-7081894	1.8446	0.793006	-1.2179	-4.0674	5e-05	0.000273814	Down	exoc3l4	_	cellular_component:exocyst(GO:0000145);cellular_component:exocyst(GO:0000145);molecular_function:SNARE binding(GO:0000149);biological_process:exocytosis(GO:0006887);biological_process:exocytosis(GO:0006887);biological_process:exocyst localization(GO:0051601)
ENSDART00000148254	ENSDARG00000038518	8:1834488-1851450	2.26996	9.32004	2.03767	17.2081	5e-05	0.000273814	Ups	snap29	K08509	molecular_function:SNAP receptor activity(GO:0005484);cellular_component:plasma membrane(GO:0005886);biological_process:synaptic vesicle priming(GO:0016082);molecular_function:syntaxin binding(GO:0019905);cellular_component:SNARE complex(GO:0031201);biological_process:synaptic vesicle fusion to presynaptic membrane(GO:0031629);biological_process:epidermis morphogenesis(GO:0048730)
ENSDART00000148257	ENSDARG00000037030	23:29029708-29138989	1.78805	0.772972	-1.2099	-3.40252	5e-05	0.000273814	Down	casz1	_	molecular_function:DNA binding(GO:0003677);cellular_component:nucleus(GO:0005634);biological_process:transcription, DNA-templated(GO:0006351);biological_process:central nervous system development(GO:0007417);biological_process:regulation of neuron differentiation(GO:0045664);molecular_function:metal ion binding(GO:0046872)
ENSDART00000148269	ENSDARG00000078918	13:17541534-17554353	6.91075	25.1651	1.86451	9.85715	5e-05	0.000273814	Ups	comtd1	_	molecular_function:O-methyltransferase activity(GO:0008171)
ENSDART00000148431	ENSDARG00000075525	17:25163615-25264318	0.780567	1.85069	1.24547	2.33463	0.0037	0.0137271	Ups	cln8	K12360	molecular_function:molecular_function(GO:0003674);cellular_component:membrane(GO:0016020);cellular_component:integral component of membrane(GO:0016021)
ENSDART00000148434	ENSDARG00000041569	18:17419403-17426543	29.604	81.0647	1.45328	6.78645	5e-05	0.000273814	Ups	ces2	_	molecular_function:phospholipase activity(GO:0004620);cellular_component:extracellular space(GO:0005615);biological_process:biological_process(GO:0008150);molecular_function:prenylcysteine methylesterase activity(GO:0010296);molecular_function:lipase activity(GO:0016298);molecular_function:hydrolase activity(GO:0016787);molecular_function:1-oxa-2-oxocycloheptane lactonase activity(GO:0018731);mol…
ENSDART00000148481	ENSDARG00000060410	13:35493230-35551547	0.877926	2.23122	1.34566	5.22155	5e-05	0.000273814	Ups	thbs2a	K04659	molecular_function:calcium ion binding(GO:0005509);cellular_component:extracellular region(GO:0005576);biological_process:cell adhesion(GO:0007155);molecular_function:heparin binding(GO:0008201);biological_process:negative regulation of angiogenesis(GO:0016525);cellular_component:extracellular matrix(GO:0031012)
ENSDART00000148547	ENSDARG00000042793	17:30826917-30838829	3.87001	1.27866	-1.59771	-1.79781	0.01625	0.0492508	Down	tpp1	_	molecular_function:endopeptidase activity(GO:0004175);molecular_function:serine-type endopeptidase activity(GO:0004252);biological_process:proteolysis(GO:0006508);biological_process:central nervous system development(GO:0007417);biological_process:locomotory behavior(GO:0007626);molecular_function:peptidase activity(GO:0008233);molecular_function:serine-type peptidase activity(GO:0008236);molecul…
ENSDART00000148595	ENSDARG00000076634	2:45286471-45301634	1.46988	3.48393	1.24502	3.59495	5e-05	0.000273814	Ups	capn10	K08579	molecular_function:calcium-dependent cysteine-type endopeptidase activity(GO:0004198);molecular_function:calcium-dependent cysteine-type endopeptidase activity(GO:0004198);cellular_component:intracellular(GO:0005622);cellular_component:cytoplasm(GO:0005737);biological_process:proteolysis(GO:0006508);molecular_function:peptidase activity(GO:0008233);molecular_function:cysteine-type peptidase activ…
ENSDART00000148653	ENSDARG00000088342	16:26153568-26201087	0.947598	0.192618	-2.29853	-2.58365	0.0158	0.0480748	Down	tmem145	_	biological_process:G-protein coupled receptor signaling pathway(GO:0007186);cellular_component:membrane(GO:0016020);cellular_component:integral component of membrane(GO:0016021);biological_process:response to pheromone(GO:0019236)
ENSDART00000148726	ENSDARG00000027381	23:45487011-45605143	0.597897	5.09722	3.09174	4.5916	5e-05	0.000273814	Ups	si:ch211-116m6.4	_	_
ENSDART00000148743	ENSDARG00000074428	17:25758938-25813178	2.48318	1.18135	-1.07175	-3.37263	5e-05	0.000273814	Down	hhat	_	biological_process:smoothened signaling pathway(GO:0007224);cellular_component:membrane(GO:0016020);cellular_component:integral component of membrane(GO:0016021);molecular_function:palmitoyltransferase activity(GO:0016409);biological_process:protein palmitoylation(GO:0018345)
ENSDART00000148809	ENSDARG00000069245	20:43862980-43878466	0.989978	4.49729	2.18359	5.07145	5e-05	0.000273814	Ups	matn3a	_	molecular_function:calcium ion binding(GO:0005509)
ENSDART00000148840	ENSDARG00000004537	15:23444093-23484905	1.43462	0.5497	-1.38395	-3.47714	5e-05	0.000273814	Down	kmt2a	K09186	molecular_function:DNA binding(GO:0003677);cellular_component:nucleus(GO:0005634);biological_process:regulation of transcription, DNA-templated(GO:0006355);molecular_function:methyltransferase activity(GO:0008168);molecular_function:zinc ion binding(GO:0008270);molecular_function:transferase activity(GO:0016740);biological_process:glial cell development(GO:0021782);biological_process:neurogenesis…
ENSDART00000148883	ENSDARG00000095949	1:43272715-43282241	2.20431	0.778277	-1.50197	-6.40346	5e-05	0.000273814	Down	si:dkey-22i16.9	_	cellular_component:plasma membrane(GO:0005886);cellular_component:cell-cell junction(GO:0005911);cellular_component:cell surface(GO:0009986);cellular_component:membrane(GO:0016020);cellular_component:integral component of membrane(GO:0016021);biological_process:single organismal cell-cell adhesion(GO:0016337)
ENSDART00000148907	ENSDARG00000058372	13:6158133-6195551	1.51872	3.52331	1.21408	3.2559	5e-05	0.000273814	Ups	mcph1	K19403	molecular_function:molecular_function(GO:0003674);biological_process:biological_process(GO:0008150)
ENSDART00000148945	ENSDARG00000020364	5:34858036-34887800	4.39394	25.0688	2.51231	3.24277	5e-05	0.000273814	Ups	fbp1b	_	cellular_component:cytosol(GO:0005829);biological_process:carbohydrate metabolic process(GO:0005975);biological_process:sucrose biosynthetic process(GO:0005986);biological_process:fructose metabolic process(GO:0006000);biological_process:fructose catabolic process(GO:0006001);biological_process:fructose 6-phosphate metabolic process(GO:0006002);biological_process:gluconeogenesis(GO:0006094);molec…
ENSDART00000148957	ENSDARG00000007760	7:13329535-13486138	4.92693	1.17581	-2.06704	-2.19256	0.00415	0.0151887	Down	spg21	_	cellular_component:cytoplasm(GO:0005737);cellular_component:cytosol(GO:0005829);biological_process:biological_process(GO:0008150);cellular_component:trans-Golgi network transport vesicle(GO:0030140);molecular_function:CD4 receptor binding(GO:0042609)
ENSDART00000148967	ENSDARG00000046127	7:44260087-44268104	0.770618	3.03319	1.97675	2.28482	0.00845	0.0281321	Ups	tk2	_	molecular_function:ATP binding(GO:0005524);cellular_component:cellular_component(GO:0005575);biological_process:nucleobase-containing compound metabolic process(GO:0006139);molecular_function:kinase activity(GO:0016301);biological_process:phosphorylation(GO:0016310);molecular_function:transferase activity(GO:0016740);molecular_function:nucleoside kinase activity(GO:0019206)
ENSDART00000149000	ENSDARG00000060537	20:44684227-44890849	5.84723	2.76716	-1.07935	-4.48368	5e-05	0.000273814	Down	atad2b	_	molecular_function:chromatin binding(GO:0003682);molecular_function:ATP binding(GO:0005524);cellular_component:nucleus(GO:0005634);molecular_function:ATPase activity(GO:0016887);biological_process:negative regulation of chromatin silencing(GO:0031936);molecular_function:histone binding(GO:0042393);biological_process:positive regulation of transcription from RNA polymerase II promoter(GO:0045944)
ENSDART00000149022	ENSDARG00000078326	1:35990094-36180662	6.49613	1.61071	-2.01188	-2.28848	0.0135	0.0421275	Down	arhgap10	_	molecular_function:GTPase activator activity(GO:0005096);biological_process:signal transduction(GO:0007165)
ENSDART00000149043	ENSDARG00000095922	8:50977783-50978977	9.0567	0.536276	-4.07794	-4.68563	0.0019	0.00760463	Down	zgc:91909	_	_
ENSDART00000149089	ENSDARG00000002632	12:48795596-48883985	3.03473	8.96908	1.56339	5.7328	5e-05	0.000273814	Ups	anxa11b	K17095	molecular_function:calcium ion binding(GO:0005509);molecular_function:calcium-dependent phospholipid binding(GO:0005544)
ENSDART00000149138	ENSDARG00000039436	5:36501223-36517625	0.580392	3.6208	2.64121	4.88845	5e-05	0.000273814	Ups	il13ra2	K05077	cellular_component:membrane(GO:0016020);cellular_component:integral component of membrane(GO:0016021)
ENSDART00000149162	ENSDARG00000006060	4:847995-885445	0.523889	1.66361	1.66699	3.01377	5e-05	0.000273814	Ups	aim1b	_	_
ENSDART00000149188	ENSDARG00000095832	23:45076075-45082118	2.66828	5.71144	1.09794	3.32428	5e-05	0.000273814	Ups	si:ch73-269m23.4	_	_
ENSDART00000149200	ENSDARG00000002632	12:48795596-48883985	0.883987	21.4468	4.60059	4.84199	0.00065	0.00291114	Ups	anxa11b	_	molecular_function:calcium ion binding(GO:0005509);molecular_function:calcium-dependent phospholipid binding(GO:0005544)
ENSDART00000149280	ENSDARG00000052978	2:47886275-47975318	0.796497	2.87929	1.85397	2.86828	0.00225	0.00882464	Ups	mbnl1	_	cellular_component:cellular_component(GO:0005575);biological_process:biological_process(GO:0008150);molecular_function:metal ion binding(GO:0046872)
ENSDART00000149291	ENSDARG00000036894	23:45640855-45657895	1.16797	8.15667	2.80398	2.20712	0.01425	0.044074	Ups	AIMP1 (1 of many)	_	molecular_function:tRNA binding(GO:0000049);molecular_function:tRNA binding(GO:0000049);biological_process:tRNA aminoacylation for protein translation(GO:0006418);cellular_component:aminoacyl-tRNA synthetase multienzyme complex(GO:0017101);cellular_component:methionyl glutamyl tRNA synthetase complex(GO:0017102)
ENSDART00000149358	ENSDARG00000052708	6:54796408-54816373	2.52604	13.9354	2.46381	5.19235	5e-05	0.000273814	Ups	tnni1b	K10371	biological_process:skeletal muscle contraction(GO:0003009);molecular_function:molecular_function(GO:0003674);cellular_component:troponin complex(GO:0005861);cellular_component:troponin complex(GO:0005861);biological_process:heart development(GO:0007507);biological_process:cardiac muscle contraction(GO:0060048)
ENSDART00000149360	ENSDARG00000030786	25:2909570-2932834	4.35404	1.92549	-1.17712	-2.20954	0.00095	0.00410593	Down	mpi	K01809	biological_process:liver development(GO:0001889);molecular_function:mannose-6-phosphate isomerase activity(GO:0004476);molecular_function:mannose-6-phosphate isomerase activity(GO:0004476);molecular_function:mannose-6-phosphate isomerase activity(GO:0004476);biological_process:carbohydrate metabolic process(GO:0005975);molecular_function:zinc ion binding(GO:0008270);biological_process:GDP-mannose…
ENSDART00000149373	ENSDARG00000051816	25:27836343-27892904	1.89152	0.671613	-1.49385	-2.9431	0.00025	0.0012226	Down	aass	K14157	molecular_function:oxidoreductase activity(GO:0016491);biological_process:oxidation-reduction process(GO:0055114)
ENSDART00000149374	ENSDARG00000074410	15:27519441-27589930	7.34443	3.5464	-1.05029	-2.24547	0.00595	0.0207748	Down	brip1	_	molecular_function:nucleotide binding(GO:0000166);molecular_function:nucleic acid binding(GO:0003676);molecular_function:DNA binding(GO:0003677);molecular_function:ATP-dependent DNA helicase activity(GO:0004003);molecular_function:helicase activity(GO:0004386);molecular_function:ATP binding(GO:0005524);cellular_component:nucleus(GO:0005634);biological_process:nucleobase-containing compound metabo…
ENSDART00000149410	ENSDARG00000077405	23:45487011-45605143	0.442326	37.2869	6.39742	11.6733	5e-05	0.000273814	Ups	si:ch211-116m6.3	_	_
ENSDART00000149605	ENSDARG00000021483	8:1156137-1201504	5.44084	21.5946	1.98877	5.46569	5e-05	0.000273814	Ups	cdc14b	_	cellular_component:condensed chromosome(GO:0000793);molecular_function:protein serine/threonine phosphatase activity(GO:0004722);molecular_function:protein tyrosine phosphatase activity(GO:0004725);molecular_function:protein tyrosine phosphatase activity(GO:0004725);cellular_component:nucleolus(GO:0005730);cellular_component:cytoplasm(GO:0005737);cellular_component:centrosome(GO:0005813);cellular…
ENSDART00000149635	ENSDARG00000008767	22:21644186-21730724	0.412828	1.3046	1.66	2.90341	0.0017	0.00690206	Ups	si:dkey-42p8.3	_	cellular_component:nucleus(GO:0005634);biological_process:regulation of transcription, DNA-templated(GO:0006355)
ENSDART00000149640	ENSDARG00000032553	17:9755991-9780871	12.3787	1.82821	-2.75936	-12.5458	5e-05	0.000273814	Down	egln3	K09592	molecular_function:iron ion binding(GO:0005506);molecular_function:oxidoreductase activity(GO:0016491);molecular_function:oxidoreductase activity, acting on paired donors, with incorporation or reduction of molecular oxygen(GO:0016705);molecular_function:L-ascorbic acid binding(GO:0031418);biological_process:oxidation-reduction process(GO:0055114)
ENSDART00000149709	ENSDARG00000095826	3:1338452-1602878	1.95123	4.94687	1.34213	2.04674	0.011	0.0353369	Ups	smdt1a	_	_
ENSDART00000149743	ENSDARG00000044525	22:980939-1005533	0.50888	1.40798	1.46822	2.25856	0.0064	0.0221138	Ups	pparda	_	molecular_function:DNA binding(GO:0003677);molecular_function:sequence-specific DNA binding transcription factor activity(GO:0003700);molecular_function:steroid hormone receptor activity(GO:0003707);molecular_function:ligand-activated sequence-specific DNA binding RNA polymerase II transcription factor activity(GO:0004879);cellular_component:nucleus(GO:0005634);biological_process:transcription, D…
ENSDART00000149781	ENSDARG00000091584	23:42844194-42859783	0.448129	0.982363	1.13234	2.34345	0.00285	0.0108785	Ups	si:ch73-217n20.1	_	_
ENSDART00000149904	ENSDARG00000003527	8:45373418-45408308	3.99334	19.2532	2.26943	3.34196	0.00015	0.000764619	Ups	mak16	_	biological_process:maturation of 5.8S rRNA(GO:0000460);biological_process:maturation of LSU-rRNA(GO:0000470);molecular_function:nucleic acid binding(GO:0003676);cellular_component:nucleus(GO:0005634);cellular_component:nucleolus(GO:0005730);biological_process:multicellular organismal development(GO:0007275);cellular_component:preribosome, large subunit precursor(GO:0030687)
ENSDART00000149973	ENSDARG00000027807	20:451799-475349	2.89575	0.182671	-3.98662	-3.81208	0.01015	0.032913	Down	fynrk	_	molecular_function:nucleotide binding(GO:0000166);molecular_function:protein kinase activity(GO:0004672);molecular_function:protein tyrosine kinase activity(GO:0004713);molecular_function:non-membrane spanning protein tyrosine kinase activity(GO:0004715);molecular_function:non-membrane spanning protein tyrosine kinase activity(GO:0004715);molecular_function:receptor binding(GO:0005102);molecular_…
ENSDART00000150061	ENSDARG00000058115	13:46162094-46292968	13.3733	6.63515	-1.01116	-3.10053	5e-05	0.000273814	Down	fgfr2	K05093	molecular_function:nucleotide binding(GO:0000166);biological_process:determination of left/right asymmetry in lateral mesoderm(GO:0003140);molecular_function:protein kinase activity(GO:0004672);molecular_function:protein tyrosine kinase activity(GO:0004713);molecular_function:transmembrane receptor protein tyrosine kinase activity(GO:0004714);molecular_function:fibroblast growth factor-activated …
ENSDART00000150082	ENSDARG00000097660	9:55121403-55126877	10.1207	4.31318	-1.23049	-2.88396	0.0006	0.00270717	Down	trappc2	_	cellular_component:intracellular(GO:0005622);cellular_component:nucleus(GO:0005634);cellular_component:cytoplasm(GO:0005737);cellular_component:endoplasmic reticulum(GO:0005783);cellular_component:Golgi apparatus(GO:0005794);biological_process:transport(GO:0006810);biological_process:ER to Golgi vesicle-mediated transport(GO:0006888);cellular_component:membrane(GO:0016020);biological_process:vesi…
ENSDART00000150120	ENSDARG00000061735	22:17506022-17561086	15.148	1.30974	-3.53178	-4.07396	5e-05	0.000273814	Down	hnrnpm	_	molecular_function:nucleotide binding(GO:0000166);biological_process:mRNA splicing, via spliceosome(GO:0000398);molecular_function:nucleic acid binding(GO:0003676);molecular_function:RNA binding(GO:0003723)
ENSDART00000150128	ENSDARG00000014181	6:43600208-43892926	5.1528	1.72158	-1.58162	-3.29902	0.00025	0.0012226	Down	foxp1b	_	molecular_function:sequence-specific DNA binding RNA polymerase II transcription factor activity(GO:0000981);molecular_function:nucleic acid binding(GO:0003676);molecular_function:DNA binding(GO:0003677);molecular_function:sequence-specific DNA binding transcription factor activity(GO:0003700);cellular_component:nucleus(GO:0005634);cellular_component:nucleus(GO:0005634);biological_process:transcr…
ENSDART00000150134	ENSDARG00000027070	12:15526453-15577783	0.943121	0.217544	-2.11614	-2.84435	0.00435	0.0158398	Down	acbd4	_	molecular_function:fatty-acyl-CoA binding(GO:0000062);cellular_component:cellular_component(GO:0005575);biological_process:biological_process(GO:0008150)
ENSDART00000150138	ENSDARG00000051923	5:54088190-54091953	2.25916	5.17974	1.19709	2.14309	0.00405	0.0148715	Ups	ccnb1	_	biological_process:oocyte maturation(GO:0001556);cellular_component:nucleus(GO:0005634)
ENSDART00000150158	ENSDARG00000036066	7:37978599-37986590	0.227305	0.742524	1.70781	2.74219	0.00155	0.00634657	Ups	si:dkey-78a14.4	K00622	biological_process:metabolic process(GO:0008152);molecular_function:acetyltransferase activity(GO:0016407);molecular_function:transferase activity(GO:0016740);molecular_function:transferase activity, transferring acyl groups(GO:0016746)
ENSDART00000150186	ENSDARG00000036894	23:45640855-45657895	12.5348	28.8377	1.20202	3.47326	5e-05	0.000273814	Ups	AIMP1 (1 of many)	_	molecular_function:tRNA binding(GO:0000049);molecular_function:tRNA binding(GO:0000049);biological_process:tRNA aminoacylation for protein translation(GO:0006418);cellular_component:aminoacyl-tRNA synthetase multienzyme complex(GO:0017101);cellular_component:methionyl glutamyl tRNA synthetase complex(GO:0017102)
ENSDART00000150226	ENSDARG00000060235	6:42478193-42508668	1.4736	0.460396	-1.6784	-3.18306	0.0005	0.00229906	Down	mst1ra	_	molecular_function:nucleotide binding(GO:0000166);molecular_function:protein kinase activity(GO:0004672);molecular_function:protein tyrosine kinase activity(GO:0004713);molecular_function:transmembrane receptor protein tyrosine kinase activity(GO:0004714);molecular_function:ATP binding(GO:0005524);biological_process:protein phosphorylation(GO:0006468);biological_process:transmembrane receptor pro…
ENSDART00000150269	ENSDARG00000096189	4:42433716-42563983	2.07255	0.27882	-2.894	-4.56588	5e-05	0.000273814	Down	si:dkey-54j5.2	_	_
ENSDART00000150282	ENSDARG00000096041	4:44506971-45111228	2.80396	1.04689	-1.42135	-2.58724	0.0035	0.0130631	Down	si:ch211-162i8.2	_	molecular_function:nucleic acid binding(GO:0003676);molecular_function:metal ion binding(GO:0046872)
ENSDART00000150336	ENSDARG00000033179	4:9602389-9636482	6.23994	0.691643	-3.17343	-3.63543	0.00095	0.00410593	Down	tmem243b	_	molecular_function:molecular_function(GO:0003674);biological_process:biological_process(GO:0008150);cellular_component:membrane(GO:0016020);cellular_component:integral component of membrane(GO:0016021)
ENSDART00000150354	ENSDARG00000093831	4:29893648-29900097	1.17003	0.309836	-1.91698	-2.74273	0.00495	0.0176788	Down	znf1121	_	_
ENSDART00000150438	ENSDARG00000077488	4:28429499-28515228	0.485714	1.3704	1.49641	2.08443	0.0052	0.0184467	Ups	si:ch73-289h5.4	_	_
ENSDART00000150462	ENSDARG00000096091	4:42767874-42861428	2.1449	0.250122	-3.10021	-4.55019	0.0002	0.000995331	Down	si:dkey-29j8.3	_	_
ENSDART00000150476	ENSDARG00000095440	4:42880488-42888987	0.583062	0.164423	-1.82624	-2.0161	0.0155	0.0472701	Down	si:dkeyp-53e4.2	_	_
ENSDART00000150496	ENSDARG00000022891	1:48836782-48853696	9.38703	3.79588	-1.30623	-2.72609	0.0012	0.00505884	Down	zgc:175214	_	biological_process:protein polyubiquitination(GO:0000209);molecular_function:zinc ion binding(GO:0008270);cellular_component:membrane(GO:0016020);cellular_component:integral component of membrane(GO:0016021);biological_process:protein ubiquitination involved in ubiquitin-dependent protein catabolic process(GO:0042787);biological_process:proteasome-mediated ubiquitin-dependent protein catabolic pr…
ENSDART00000150500	ENSDARG00000086449	4:33326257-33629836	1.72262	0.0943271	-4.19079	-3.26743	0.0071	0.0242001	Down	znf1055	_	_
ENSDART00000150532	ENSDARG00000075470	4:72009518-72016929	1.95927	0.911533	-1.10395	-2.68071	0.0007	0.00311162	Down	znf989	_	molecular_function:nucleic acid binding(GO:0003676);molecular_function:metal ion binding(GO:0046872)
ENSDART00000150537	ENSDARG00000079917	25:25358492-25407516	14.436	6.9684	-1.05078	-2.64591	0.00125	0.00524587	Down	rassf7a	_	biological_process:signal transduction(GO:0007165);biological_process:regulation of microtubule cytoskeleton organization(GO:0070507)
ENSDART00000150544	ENSDARG00000096012	4:44457513-44475284	3.85553	0.169112	-4.51087	-4.66905	0.00325	0.0122479	Down	znf1115	_	_
ENSDART00000150576	ENSDARG00000096026	4:57489607-57495604	0.998319	4.52445	2.18017	4.80744	5e-05	0.000273814	Ups	si:dkey-4e4.1	_	_
ENSDART00000150608	ENSDARG00000068208	18:31302657-31481351	10.2315	3.89126	-1.3947	-2.02126	0.0138	0.0429151	Down	def8	_	biological_process:intracellular signal transduction(GO:0035556)
ENSDART00000150625	ENSDARG00000096140	4:33326257-33629836	0.370333	2.19315	2.56611	3.6252	0.0009	0.00391406	Ups	znf1120	_	_
ENSDART00000150655	ENSDARG00000096210	4:57135125-57353149	0.697226	1.94283	1.47846	2.53553	0.0013	0.00542878	Ups	znf1050	_	_
ENSDART00000150675	ENSDARG00000095126	4:59016294-59020474	1.68293	5.32733	1.66243	6.6113	5e-05	0.000273814	Ups	si:dkey-82i20.2	_	molecular_function:nucleic acid binding(GO:0003676);molecular_function:metal ion binding(GO:0046872)
ENSDART00000150758	ENSDARG00000091648	4:57902137-57987536	0.951615	1.91769	1.01092	1.89164	0.0083	0.0277054	Ups	znf1033	_	_
ENSDART00000150762	ENSDARG00000094558	4:42746118-42752729	2.14856	0.921262	-1.22169	-3.52577	5e-05	0.000273814	Down	si:dkeyp-53e4.1	_	_
ENSDART00000150798	ENSDARG00000096217	4:44380152-44388931	1.22897	0.240739	-2.35191	-5.56342	5e-05	0.000273814	Down	si:dkey-51d8.9	_	molecular_function:DNA binding(GO:0003677);biological_process:DNA recombination(GO:0006310);biological_process:DNA integration(GO:0015074)
ENSDART00000150851	ENSDARG00000096186	4:33326257-33629836	0.549948	1.89879	1.78771	3.45967	0.0002	0.000995331	Ups	si:dkey-247i3.5	_	_
ENSDART00000150856	ENSDARG00000091524	4:44506971-45111228	0.919167	0.131162	-2.80898	-2.91032	0.00185	0.00743006	Down	znf1031	_	_
ENSDART00000150885	ENSDARG00000070721	6:38957196-39008913	9.26182	4.57252	-1.01831	-6.82164	5e-05	0.000273814	Down	vdrb	K08539	biological_process:heart looping(GO:0001947);biological_process:heart jogging(GO:0003146);molecular_function:DNA binding(GO:0003677);molecular_function:sequence-specific DNA binding transcription factor activity(GO:0003700);molecular_function:sequence-specific DNA binding transcription factor activity(GO:0003700);molecular_function:steroid hormone receptor activity(GO:0003707);cellular_component:…
ENSDART00000150929	ENSDARG00000096422	19:43273671-43274735	2.3848	5.86655	1.29864	3.58972	5e-05	0.000273814	Ups	si:ch211-207c15.7	_	_
ENSDART00000150997	ENSDARG00000096331	3:32455295-32487920	2.44505	4.92054	1.00895	5.2062	5e-05	0.000273814	Ups	si:ch73-248e21.7	_	cellular_component:membrane(GO:0016020);cellular_component:integral component of membrane(GO:0016021)
ENSDART00000151044	ENSDARG00000057782	6:11580210-11767686	6.67204	3.21166	-1.05481	-6.16179	5e-05	0.000273814	Down	baz2ba	_	molecular_function:DNA binding(GO:0003677);cellular_component:nucleus(GO:0005634);molecular_function:zinc ion binding(GO:0008270);molecular_function:metal ion binding(GO:0046872)
ENSDART00000151050	ENSDARG00000011076	19:5073823-5082746	13.5478	31.1144	1.19953	3.38534	5e-05	0.000273814	Ups	MREG	_	molecular_function:molecular_function(GO:0003674);cellular_component:plasma membrane(GO:0005886);cellular_component:membrane(GO:0016020);cellular_component:apical plasma membrane(GO:0016324);biological_process:melanosome transport(GO:0032402);cellular_component:melanosome(GO:0042470)
ENSDART00000151102	ENSDARG00000088411	6:10708589-10728460	2.80883	1.03597	-1.43899	-3.25337	0.0001	0.0005238	Down	notum2	K19882	molecular_function:phospholipase activity(GO:0004620);cellular_component:extracellular region(GO:0005576);biological_process:motor neuron axon guidance(GO:0008045);molecular_function:prenylcysteine methylesterase activity(GO:0010296);molecular_function:lipase activity(GO:0016298);molecular_function:hydrolase activity(GO:0016787);molecular_function:1-oxa-2-oxocycloheptane lactonase activity(GO:001…
ENSDART00000151106	ENSDARG00000053404	21:45310848-45323145	16.9895	2.51594	-2.75547	-7.11734	5e-05	0.000273814	Down	zgc:56064	K04382	molecular_function:phosphoprotein phosphatase activity(GO:0004721);cellular_component:cellular_component(GO:0005575);molecular_function:hydrolase activity(GO:0016787)
ENSDART00000151157	ENSDARG00000096273	19:10875053-10910681	4.53631	0.43927	-3.36834	-7.37335	5e-05	0.000273814	Down	si:dkey-3n22.9	_	_
ENSDART00000151305	ENSDARG00000060246	3:36183933-36199074	2.20909	6.35391	1.52419	12.0636	5e-05	0.000273814	Ups	slc16a6b	K08183	cellular_component:integral component of plasma membrane(GO:0005887);molecular_function:lactate transmembrane transporter activity(GO:0015129);cellular_component:membrane(GO:0016020);cellular_component:integral component of membrane(GO:0016021);biological_process:plasma membrane lactate transport(GO:0035879);biological_process:transmembrane transport(GO:0055085)
ENSDART00000151322	ENSDARG00000028618	6:39362840-39367931	10.665	27.5073	1.36693	5.32569	5e-05	0.000273814	Ups	KRT18 (1 of many)	_	molecular_function:structural molecule activity(GO:0005198);cellular_component:intermediate filament(GO:0005882);biological_process:biological_process(GO:0008150)
ENSDART00000151366	ENSDARG00000091119	21:22694684-22700623	0.600848	1.20479	1.00371	2.01537	0.0073	0.0247971	Ups	fbxo40.2	K10315	molecular_function:ubiquitin-protein transferase activity(GO:0004842);molecular_function:zinc ion binding(GO:0008270);biological_process:protein ubiquitination(GO:0016567);molecular_function:metal ion binding(GO:0046872);molecular_function:ubiquitin protein ligase activity(GO:0061630)
ENSDART00000151476	ENSDARG00000037961	3:32400829-32409358	1.14593	3.93695	1.78057	2.3793	0.00505	0.01799	Ups	rcn3	_	molecular_function:calcium ion binding(GO:0005509)
ENSDART00000151582	ENSDARG00000012688	19:5501519-5505124	28.9716	72.6478	1.32628	3.60468	5e-05	0.000273814	Ups	eif1b	_	molecular_function:translation initiation factor activity(GO:0003743);biological_process:translation(GO:0006412);biological_process:translational initiation(GO:0006413)
ENSDART00000151720	ENSDARG00000087508	9:56247361-56292510	8.68502	19.389	1.15864	14.0527	5e-05	0.000273814	Ups	si:ch211-39i22.1	_	cellular_component:membrane(GO:0016020);cellular_component:integral component of membrane(GO:0016021)
ENSDART00000151836	ENSDARG00000096451	24:12594553-12606208	0.568068	1.30558	1.20056	3.32534	5e-05	0.000273814	Ups	si:ch211-196f5.9	_	_
ENSDART00000151850	ENSDARG00000024314	18:17611572-17619512	11.3946	3.06028	-1.89662	-5.0126	5e-05	0.000273814	Down	herpud1	_	molecular_function:molecular_function(GO:0003674);cellular_component:membrane(GO:0016020);cellular_component:integral component of membrane(GO:0016021)
ENSDART00000151874	ENSDARG00000056099	20:26146162-26148697	11.9947	29.6974	1.30794	4.42826	5e-05	0.000273814	Ups	gtf2h5	K10845	cellular_component:core TFIIH complex(GO:0000439);biological_process:nucleotide-excision repair(GO:0006289);biological_process:regulation of transcription, DNA-templated(GO:0006355)
ENSDART00000151882	ENSDARG00000091280	2:45588008-45595293	11.0675	0.775666	-3.83475	-6.99475	0.00015	0.000764619	Down	si:ch211-66k16.27	_	biological_process:regulation of apoptotic process(GO:0042981)
ENSDART00000151890	ENSDARG00000096497	4:39778362-40139189	0.734054	1.84759	1.33169	2.0832	0.0093	0.0305145	Ups	si:dkey-22h13.3	_	_
ENSDART00000151892	ENSDARG00000096489	20:30128698-30181234	11.7101	23.6302	1.01288	4.08375	5e-05	0.000273814	Ups	si:dkey-227h16.2	_	_
ENSDART00000151912	ENSDARG00000090116	4:40411456-40418191	1.07227	4.61415	2.10539	7.12446	5e-05	0.000273814	Ups	znf1136	_	molecular_function:RNA polymerase II core promoter proximal region sequence-specific DNA binding(GO:0000978);molecular_function:nucleic acid binding(GO:0003676);cellular_component:nucleus(GO:0005634);biological_process:regulation of transcription, DNA-templated(GO:0006355);molecular_function:metal ion binding(GO:0046872)
ENSDART00000151925	ENSDARG00000077245	24:481557-527779	0.62666	0.309932	-1.01573	-2.66134	0.0008	0.00350977	Down	si:dkey-225n22.4	_	_
ENSDART00000152006	ENSDARG00000086418	17:8134382-8148614	0.866849	0.272324	-1.67046	-2.04192	0.00495	0.0176788	Down	si:ch211-236p5.3	_	molecular_function:nucleotide binding(GO:0000166);molecular_function:ATP binding(GO:0005524)
ENSDART00000152128	ENSDARG00000063555	12:3729791-3742083	3.06268	1.39757	-1.13187	-2.6196	5e-05	0.000273814	Down	si:ch211-166g5.4	_	molecular_function:nucleic acid binding(GO:0003676);molecular_function:metal ion binding(GO:0046872)
ENSDART00000152150	ENSDARG00000096668	1:29914314-29919327	9.4089	3.11584	-1.59441	-4.25303	5e-05	0.000273814	Down	MZT1	_	cellular_component:gamma-tubulin ring complex(GO:0008274);cellular_component:membrane(GO:0016020);cellular_component:integral component of membrane(GO:0016021);biological_process:gamma-tubulin complex localization(GO:0033566)
ENSDART00000152182	ENSDARG00000053463	1:28071036-28085742	5.9391	13.7951	1.21584	2.84955	5e-05	0.000273814	Ups	poglut1	_	cellular_component:endoplasmic reticulum lumen(GO:0005788);biological_process:protein O-linked glycosylation(GO:0006493);biological_process:glycolipid metabolic process(GO:0006664);molecular_function:UDP-glucosyltransferase activity(GO:0035251);molecular_function:UDP-xylosyltransferase activity(GO:0035252);biological_process:positive regulation of Notch signaling pathway(GO:0045747)
ENSDART00000152269	ENSDARG00000040184	20:2714687-2728646	8.30277	2.6211	-1.66342	-2.21085	0.013	0.0407723	Down	syncrip	_	molecular_function:nucleotide binding(GO:0000166);molecular_function:nucleic acid binding(GO:0003676)
ENSDART00000152365	ENSDARG00000019949	15:29450291-29454673	0.968341	2.11111	1.12442	2.20354	0.00255	0.00985866	Ups	serpinh1b	_	molecular_function:serine-type endopeptidase inhibitor activity(GO:0004867);molecular_function:serine-type endopeptidase inhibitor activity(GO:0004867);molecular_function:collagen binding(GO:0005518);molecular_function:collagen binding(GO:0005518);cellular_component:extracellular space(GO:0005615);cellular_component:extracellular space(GO:0005615);cellular_component:endoplasmic reticulum(GO:00057…
ENSDART00000152393	ENSDARG00000096667	1:25974157-25982677	10.3782	21.8324	1.07291	2.14172	0.0081	0.0271253	Ups	si:dkey-25o16.2	_	_
ENSDART00000152433	ENSDARG00000059079	12:3677310-3685192	13.2418	5.99703	-1.14278	-4.55282	5e-05	0.000273814	Down	vps25	K12189	cellular_component:ESCRT II complex(GO:0000814);molecular_function:structural molecule activity(GO:0005198);cellular_component:cytoplasm(GO:0005737);biological_process:transport(GO:0006810);biological_process:protein transport(GO:0015031);molecular_function:protein homodimerization activity(GO:0042803);biological_process:protein targeting to vacuole involved in ubiquitin-dependent protein catabol…
ENSDART00000152603	ENSDARG00000062562	15:8359528-8406926	8.20424	2.53701	-1.69324	-12.2336	5e-05	0.000273814	Down	egln2	K09592	molecular_function:iron ion binding(GO:0005506);molecular_function:oxidoreductase activity(GO:0016491);molecular_function:oxidoreductase activity, acting on paired donors, with incorporation or reduction of molecular oxygen(GO:0016705);molecular_function:L-ascorbic acid binding(GO:0031418);biological_process:oxidation-reduction process(GO:0055114)
ENSDART00000152703	ENSDARG00000096655	20:14739444-14784917	0.268437	1.4059	2.38884	3.02174	0.00135	0.00560823	Ups	si:ch211-184m19.3	_	_
ENSDART00000152785	ENSDARG00000096667	1:25974157-25982677	5.44537	11.0811	1.025	2.99509	5e-05	0.000273814	Ups	si:dkey-25o16.2	_	_
ENSDART00000152855	ENSDARG00000058734	2:6194608-6203806	38.6769	1.57044	-4.62223	-7.29135	5e-05	0.000273814	Down	prdx1	_	molecular_function:thioredoxin peroxidase activity(GO:0008379);molecular_function:antioxidant activity(GO:0016209);molecular_function:oxidoreductase activity(GO:0016491);biological_process:removal of superoxide radicals(GO:0019430);biological_process:cell redox homeostasis(GO:0045454);molecular_function:peroxiredoxin activity(GO:0051920);biological_process:oxidation-reduction process(GO:0055114)
ENSDART00000152863	ENSDARG00000096700	12:20371009-20378455	0.824606	2.51985	1.61156	4.78272	5e-05	0.000273814	Ups	si:zfos-754c12.1	_	_
ENSDART00000152987	ENSDARG00000090623	2:7423908-7540975	1.20918	0.484807	-1.31855	-5.61924	5e-05	0.000273814	Down	si:dkeyp-106c3.1	_	molecular_function:molecular_function(GO:0003674);cellular_component:cellular_component(GO:0005575);biological_process:biological_process(GO:0008150)
ENSDART00000153026	ENSDARG00000096749	12:34723998-34726414	12.764	26.9799	1.0798	4.90404	5e-05	0.000273814	Ups	si:dkey-21c1.6	_	_
ENSDART00000153040	ENSDARG00000091243	20:47292784-47300242	2.57618	0.575459	-2.16245	-3.70428	0.00025	0.0012226	Down	znf975	_	_
ENSDART00000153102	ENSDARG00000057484	12:31605770-31611846	0.921155	2.79974	1.60378	2.18377	0.00865	0.0286919	Ups	srsf2a	_	molecular_function:nucleotide binding(GO:0000166);molecular_function:nucleic acid binding(GO:0003676);molecular_function:RNA binding(GO:0003723)
ENSDART00000153156	ENSDARG00000075817	20:53602866-53630066	1.17489	3.21694	1.45316	2.62265	0.00225	0.00882464	Ups	mettl24	_	cellular_component:membrane(GO:0016020);cellular_component:integral component of membrane(GO:0016021)
ENSDART00000153180	ENSDARG00000096803	20:51576768-51578157	1.05069	0.148268	-2.82505	-2.1805	0.0063	0.0218277	Down	si:ch73-91k6.6	_	_
ENSDART00000153212	ENSDARG00000054177	12:28940004-29105361	0.468787	1.20542	1.36253	4.90426	5e-05	0.000273814	Ups	adgra1a	K08460	molecular_function:transmembrane signaling receptor activity(GO:0004888);molecular_function:G-protein coupled receptor activity(GO:0004930);biological_process:cell surface receptor signaling pathway(GO:0007166);biological_process:G-protein coupled receptor signaling pathway(GO:0007186);cellular_component:membrane(GO:0016020);cellular_component:integral component of membrane(GO:0016021)
ENSDART00000153299	ENSDARG00000096703	20:27792216-27794777	0.124933	0.727157	2.54111	2.81942	0.01365	0.0425101	Ups	si:dkey-1h6.8	_	_
ENSDART00000153323	ENSDARG00000030108	2:10148300-10192127	1.87829	5.28269	1.49185	2.07343	0.00465	0.0167856	Ups	sec22ba	_	cellular_component:Golgi membrane(GO:0000139);molecular_function:SNARE binding(GO:0000149);molecular_function:SNAP receptor activity(GO:0005484);cellular_component:endoplasmic reticulum(GO:0005783);cellular_component:endoplasmic reticulum membrane(GO:0005789);cellular_component:Golgi apparatus(GO:0005794);biological_process:transport(GO:0006810);biological_process:exocytosis(GO:0006887);biologica…
ENSDART00000153347	ENSDARG00000043019	20:25953921-25979517	4.4986	9.1781	1.02872	2.19759	0.0049	0.0175429	Ups	exoc1	_	cellular_component:exocyst(GO:0000145);cellular_component:exocyst(GO:0000145);molecular_function:phosphatidylinositol-4,5-bisphosphate binding(GO:0005546);cellular_component:plasma membrane(GO:0005886);biological_process:exocytosis(GO:0006887);biological_process:exocytosis(GO:0006887);biological_process:Golgi to plasma membrane transport(GO:0006893);molecular_function:GTP-Rho binding(GO:0017049);…
ENSDART00000153360	ENSDARG00000089158	20:47240178-47248145	2.4897	0.794914	-1.6471	-4.59521	5e-05	0.000273814	Down	si:dkeyp-104f11.6	_	molecular_function:nucleic acid binding(GO:0003676);molecular_function:metal ion binding(GO:0046872)
ENSDART00000153634	ENSDARG00000097145	22:3370078-3747162	30.3797	9.4944	-1.67796	-2.43466	0.0073	0.0247971	Down	si:ch73-248e17.1	_	_
ENSDART00000153656	ENSDARG00000080001	22:27489647-27499674	1.56234	0	-inf	-nan	5e-05	0.000273814	Down	si:dkey-208m12.2	_	_
ENSDART00000153691	ENSDARG00000097815	5:68410885-68411904	4.64685	1.37401	-1.75786	-3.54972	0.0002	0.000995331	Down	si:ch73-39o22.3	_	_
ENSDART00000153743	ENSDARG00000089458	17:5599450-5665024	0.647658	0.171553	-1.91658	-4.74015	5e-05	0.000273814	Down	rp1l1a	K19538	cellular_component:axoneme(GO:0005930);biological_process:axoneme assembly(GO:0035082);biological_process:intracellular signal transduction(GO:0035556);biological_process:photoreceptor cell development(GO:0042461);biological_process:retina development in camera-type eye(GO:0060041)
ENSDART00000153747	ENSDARG00000097836	25:34597412-34597866	1.46114	0	-inf	-nan	5e-05	0.000273814	Down	si:dkey-108k21.24	K11254	cellular_component:nucleosome(GO:0000786);molecular_function:DNA binding(GO:0003677);cellular_component:nucleus(GO:0005634);cellular_component:chromosome(GO:0005694);molecular_function:protein heterodimerization activity(GO:0046982)
ENSDART00000153803	ENSDARG00000097526	21:22330675-22338370	1.91558	0	-inf	-nan	5e-05	0.000273814	Down	si:ch73-112l6.6	_	_
ENSDART00000153885	ENSDARG00000092471	4:43800566-43843825	1.86213	0.406826	-2.19447	-2.31333	0.01385	0.0430466	Down	si:dkey-7j22.1	_	_
ENSDART00000154032	ENSDARG00000097883	8:23231610-23307025	0.765045	0.325257	-1.23396	-2.81833	0.00035	0.00165905	Down	si:ch211-196c10.14	_	_
ENSDART00000154058	ENSDARG00000097738	3:23089721-23108910	1.34492	0.477934	-1.49263	-2.32102	0.01125	0.0360653	Down	si:dkey-31n5.4	_	_
ENSDART00000154138	ENSDARG00000087985	17:43633059-43648155	0.821549	0.337064	-1.28532	-2.13933	0.014	0.0434596	Down	znf365	K16737	_
ENSDART00000154159	ENSDARG00000097874	17:40071805-40072554	0	0.758784	inf	-nan	0.00105	0.00448059	Ups	si:dkey-187k19.1	_	_
ENSDART00000154314	ENSDARG00000028306	11:3186363-3266090	2.73219	7.43193	1.44368	7.20903	5e-05	0.000273814	Ups	prph	K07607	molecular_function:structural molecule activity(GO:0005198);cellular_component:intermediate filament(GO:0005882);biological_process:tissue regeneration(GO:0042246);cellular_component:type III intermediate filament(GO:0045098)
ENSDART00000154349	ENSDARG00000007494	11:26330875-26352813	10.7008	1.04284	-3.35912	-8.8182	5e-05	0.000273814	Down	st3gal8	_	biological_process:ganglioside biosynthetic process(GO:0001574);molecular_function:beta-galactoside (CMP) alpha-2,3-sialyltransferase activity(GO:0003836);molecular_function:beta-galactoside (CMP) alpha-2,3-sialyltransferase activity(GO:0003836);cellular_component:Golgi apparatus(GO:0005794);biological_process:protein glycosylation(GO:0006486);molecular_function:sialyltransferase activity(GO:0008…
ENSDART00000154365	ENSDARG00000003970	3:52352375-52360084	0.350772	1.2175	1.79532	2.92909	0.00105	0.00448059	Ups	trim35-13	_	cellular_component:intracellular(GO:0005622);molecular_function:zinc ion binding(GO:0008270);molecular_function:metal ion binding(GO:0046872)
ENSDART00000154402	ENSDARG00000097546	24:36442959-36449323	1.57225	3.24572	1.0457	3.22875	5e-05	0.000273814	Ups	si:ch211-253b1.6	_	molecular_function:nucleic acid binding(GO:0003676);cellular_component:cellular_component(GO:0005575);biological_process:biological_process(GO:0008150)
ENSDART00000154553	ENSDARG00000037895	3:36694852-36704638	2.38758	5.18627	1.11915	3.47922	5e-05	0.000273814	Ups	ramp2	_	biological_process:intracellular protein transport(GO:0006886);biological_process:regulation of G-protein coupled receptor protein signaling pathway(GO:0008277);molecular_function:protein transporter activity(GO:0008565);cellular_component:membrane(GO:0016020);cellular_component:integral component of membrane(GO:0016021)
ENSDART00000154655	ENSDARG00000092743	25:34562359-34562734	1.1767	0	-inf	-nan	0.0078	0.0262655	Down	si:dkey-108k21.17	K11252	_
ENSDART00000154691	ENSDARG00000053609	25:3675567-3682983	1.23849	7.14548	2.52845	3.91396	0.0007	0.00311162	Ups	pddc1	_	cellular_component:extracellular region(GO:0005576);molecular_function:glyoxalase III activity(GO:0019172);biological_process:methylglyoxal catabolic process to D-lactate(GO:0019243)
ENSDART00000154709	ENSDARG00000097441	9:29825873-29851879	0.462637	0.939548	1.02208	2.22737	0.00335	0.0125789	Ups	si:ch211-261i19.3	_	_
ENSDART00000154765	ENSDARG00000075977	25:20977373-20994568	1.81294	0.6452	-1.49051	-2.32266	0.0063	0.0218277	Down	prr5a	_	cellular_component:TORC2 complex(GO:0031932);biological_process:TORC2 signaling(GO:0038203)
ENSDART00000154820	ENSDARG00000097268	24:39225511-39226377	9.73724	3.89403	-1.32225	-5.01829	5e-05	0.000273814	Down	si:ch73-171a6.2	_	_
ENSDART00000154825	ENSDARG00000070339	23:35982621-36178306	11.1662	5.50402	-1.02058	-3.38562	5e-05	0.000273814	Down	hoxc3a	_	molecular_function:DNA binding(GO:0003677);cellular_component:nucleus(GO:0005634);biological_process:regulation of transcription, DNA-templated(GO:0006355);biological_process:multicellular organismal development(GO:0007275);molecular_function:sequence-specific DNA binding(GO:0043565)
ENSDART00000154835	ENSDARG00000017229	10:16111866-16204182	2.39281	0.732005	-1.70878	-5.86004	5e-05	0.000273814	Down	megf10	_	cellular_component:membrane(GO:0016020);cellular_component:integral component of membrane(GO:0016021);biological_process:myofibril assembly(GO:0030239)
ENSDART00000154852	ENSDARG00000045633	25:27380907-27399476	0.681872	3.36494	2.30301	2.80705	0.00495	0.0176788	Ups	asb15a	_	cellular_component:ubiquitin ligase complex(GO:0000151);molecular_function:ubiquitin-protein transferase activity(GO:0004842);cellular_component:nucleus(GO:0005634);cellular_component:cytoplasm(GO:0005737);biological_process:protein ubiquitination(GO:0016567);molecular_function:ubiquitin protein ligase binding(GO:0031625);biological_process:intracellular signal transduction(GO:0035556)
ENSDART00000154885	ENSDARG00000097770	15:23864195-23866234	5.98399	12.5254	1.06567	8.28088	5e-05	0.000273814	Ups	si:ch211-167j9.4	_	_
ENSDART00000154945	ENSDARG00000090552	16:43124320-43381181	12.2979	30.038	1.28837	5.72575	5e-05	0.000273814	Ups	si:dkey-7j14.6	_	cellular_component:membrane(GO:0016020);cellular_component:integral component of membrane(GO:0016021)
ENSDART00000155002	ENSDARG00000075444	17:32670419-32684022	3.71774	9.17809	1.30377	2.83271	5e-05	0.000273814	Ups	cgref1	_	molecular_function:calcium ion binding(GO:0005509)
ENSDART00000155020	ENSDARG00000074590	17:24312559-24426001	1.48326	0.497145	-1.57703	-2.21364	0.01095	0.0351803	Down	wdpcp	_	biological_process:establishment of planar polarity(GO:0001736);biological_process:establishment of protein localization(GO:0045184)
ENSDART00000155038	ENSDARG00000096904	23:16504356-16599355	0.366811	1.01093	1.46258	2.63858	0.00265	0.0102015	Ups	si:dkeyp-100a5.4	_	_
ENSDART00000155060	ENSDARG00000051770	25:34542495-34542882	0.936175	0	-inf	-nan	0.00655	0.0225678	Down	zgc:110434	K11251	_
ENSDART00000155071	ENSDARG00000097807	6:50743095-50748326	0	0.845726	inf	-nan	0.0003	0.00143914	Ups	si:ch211-242h13.1	_	_
ENSDART00000155118	ENSDARG00000096917	22:13251915-13325579	0.523647	1.62424	1.6331	6.61171	5e-05	0.000273814	Ups	si:ch211-227m13.1	_	_
ENSDART00000155149	ENSDARG00000097893	25:9577729-9587240	0	0.591006	inf	-nan	0.0088	0.0290893	Ups	si:ch211-239b20.2	_	_
ENSDART00000155251	ENSDARG00000090532	4:47771777-47905558	1.46779	0.462724	-1.66542	-2.77159	0.00215	0.00848366	Down	znf974	_	_
ENSDART00000155256	ENSDARG00000073905	25:222264-238764	29.098	8.9657	-1.69843	-8.69075	5e-05	0.000273814	Down	VWA5A (1 of many)	_	molecular_function:molecular_function(GO:0003674);cellular_component:cellular_component(GO:0005575);biological_process:biological_process(GO:0008150)
ENSDART00000155280	ENSDARG00000097155	25:8546640-8548533	0.556047	1.26452	1.18531	2.6955	0.00075	0.00330965	Ups	GDPGP1	K15630	molecular_function:nucleotide binding(GO:0000166);molecular_function:guanyl-nucleotide exchange factor activity(GO:0005085);cellular_component:cytoplasm(GO:0005737);cellular_component:cytoplasm(GO:0005737);cellular_component:cytoplasm(GO:0005737);biological_process:glucose metabolic process(GO:0006006);biological_process:glucose metabolic process(GO:0006006);molecular_function:transferase activit…
[truncated: 591 more rows]
