# Supplementary material for: The Requirement of Sox2 for the Spinal Cord Motor Neuron Development of Zebrafish
Source: Front Mol Neurosci. 2020 Mar 27;13:34. doi: 10.3389/fnmol.2020.00034 (PMC7135881; doi:10.3389/fnmol.2020.00034)
Supplement: Supplementary file 2 [file Table_2.XLS]

id	GeneId	Locus	FPKM_sample1	FPKM_sample2	log2FoldChange	test_stat	p_value	padj	significant	GeneSymbol	KO	GO
ENSDART00000000698	ENSDARG00000000656	19:7186912-7225660	0.275995	1.13979	2.04606	2.10493	0.0089	0.0263815	Ups	psmb9a	K02741	cellular_component:proteasome complex(GO:0000502);molecular_function:endopeptidase activity(GO:0004175);molecular_function:threonine-type endopeptidase activity(GO:0004298);cellular_component:nucleus(GO:0005634);cellular_component:cytoplasm(GO:0005737);cellular_component:proteasome core complex(GO:0005839);biological_process:proteolysis(GO:0006508);molecular_function:peptidase activity(GO:0008233…
ENSDART00000002078	ENSDARG00000016854	12:14881784-14884652	0.0918729	1.45558	3.98581	3.22365	0.0167	0.0456462	Ups	neurod2	K09078	molecular_function:DNA binding(GO:0003677);cellular_component:nucleus(GO:0005634);biological_process:transcription, DNA-templated(GO:0006351);biological_process:regulation of transcription, DNA-templated(GO:0006355);biological_process:multicellular organismal development(GO:0007275);biological_process:nervous system development(GO:0007399);biological_process:cell differentiation(GO:0030154);biolo…
ENSDART00000002164	ENSDARG00000008433	8:11166353-11191818	33.3409	14.5273	-1.19852	-19.6046	5e-05	0.000238134	Down	unc45b	_	molecular_function:protein binding(GO:0005515);cellular_component:cytoplasm(GO:0005737);cellular_component:cytoplasm(GO:0005737);biological_process:multicellular organismal development(GO:0007275);biological_process:muscle organ development(GO:0007517);biological_process:skeletal muscle tissue development(GO:0007519);cellular_component:Z disc(GO:0030018);biological_process:cell differentiation(GO…
ENSDART00000002242	ENSDARG00000095751	20:1377737-1385482	0.682826	3.00917	2.13977	4.99029	5e-05	0.000238134	Ups	zgc:77778	_	biological_process:liver development(GO:0001889);molecular_function:molecular_function(GO:0003674);cellular_component:extracellular region(GO:0005576);cellular_component:extracellular space(GO:0005615);biological_process:multicellular organismal development(GO:0007275);biological_process:digestive system development(GO:0055123)
ENSDART00000002510	ENSDARG00000014545	2:36718864-36738832	6.0158	1.64476	-1.87088	-9.21098	5e-05	0.000238134	Down	golim4b	_	molecular_function:molecular_function(GO:0003674);biological_process:biological_process(GO:0008150);cellular_component:membrane(GO:0016020);cellular_component:integral component of membrane(GO:0016021)
ENSDART00000002867	ENSDARG00000019746	12:3019706-3042662	3.081	1.40744	-1.13033	-2.81644	5e-05	0.000238134	Down	rfng	K05948	cellular_component:Golgi apparatus(GO:0005794);biological_process:Notch signaling pathway(GO:0007219);biological_process:multicellular organismal development(GO:0007275);biological_process:pattern specification process(GO:0007389);biological_process:nervous system development(GO:0007399);cellular_component:membrane(GO:0016020);cellular_component:integral component of membrane(GO:0016021);molecula…
ENSDART00000003167	ENSDARG00000005926	19:35831547-35841818	14.8076	5.87979	-1.3325	-5.1284	5e-05	0.000238134	Down	ak2	K00939	molecular_function:nucleotide binding(GO:0000166);biological_process:hematopoietic progenitor cell differentiation(GO:0002244);biological_process:leukocyte differentiation(GO:0002521);molecular_function:adenylate kinase activity(GO:0004017);molecular_function:ATP binding(GO:0005524);cellular_component:mitochondrion(GO:0005739);cellular_component:mitochondrial intermembrane space(GO:0005758);biolo…
ENSDART00000003170	ENSDARG00000018145	14:41099113-41101782	46.6552	17.6144	-1.40528	-14.6515	5e-05	0.000238134	Down	mid1ip1l	_	cellular_component:nucleus(GO:0005634);cellular_component:cytoplasm(GO:0005737);cellular_component:cytoskeleton(GO:0005856);cellular_component:microtubule(GO:0005874)
ENSDART00000003193	ENSDARG00000010317	9:31265309-31355656	1.5025	0.500014	-1.58732	-2.99563	0.00075	0.00293046	Down	gpr183a	K04305	biological_process:adaptive immune response(GO:0002250);biological_process:adaptive immune response(GO:0002250);biological_process:B cell activation involved in immune response(GO:0002312);biological_process:immune system process(GO:0002376);biological_process:dendritic cell chemotaxis(GO:0002407);molecular_function:signal transducer activity(GO:0004871);molecular_function:G-protein coupled recep…
ENSDART00000003210	ENSDARG00000020237	18:31247955-31249283	0.749998	1.92631	1.36088	3.02666	0.00055	0.00220876	Ups	mc1r	K04199	molecular_function:signal transducer activity(GO:0004871);molecular_function:G-protein coupled receptor activity(GO:0004930);molecular_function:melanocortin receptor activity(GO:0004977);molecular_function:melanocyte-stimulating hormone receptor activity(GO:0004980);molecular_function:protein binding(GO:0005515);cellular_component:plasma membrane(GO:0005886);cellular_component:plasma membrane(GO:…
ENSDART00000003646	ENSDARG00000014358	11:22952864-22966343	9.6339	1.59971	-2.59031	-9.60145	5e-05	0.000238134	Down	optc	K08127	cellular_component:proteinaceous extracellular matrix(GO:0005578);cellular_component:extracellular space(GO:0005615);molecular_function:heparin binding(GO:0008201);biological_process:Roundabout signaling pathway(GO:0035385);molecular_function:Roundabout binding(GO:0048495);biological_process:axon extension involved in axon guidance(GO:0048846);biological_process:regulation of axonogenesis(GO:0050…
ENSDART00000003665	ENSDARG00000005485	25:7858886-7864844	4.36754	13.8046	1.66026	3.08793	0.00045	0.00184244	Ups	ucmab	_	molecular_function:molecular_function(GO:0003674);cellular_component:extracellular region(GO:0005576);cellular_component:proteinaceous extracellular matrix(GO:0005578);biological_process:regulation of osteoblast differentiation(GO:0045667);biological_process:embryonic skeletal system development(GO:0048706)
ENSDART00000003745	ENSDARG00000010008	24:32236985-32281769	117.893	43.5626	-1.43631	-27.6011	5e-05	0.000238134	Down	vim	K07606	molecular_function:structural molecule activity(GO:0005198);cellular_component:intermediate filament(GO:0005882)
ENSDART00000003879	ENSDARG00000009982	14:10032402-10065624	4.08146	8.35854	1.03416	13.0766	5e-05	0.000238134	Ups	fam199x	_	molecular_function:molecular_function(GO:0003674);cellular_component:cellular_component(GO:0005575);biological_process:biological_process(GO:0008150)
ENSDART00000004071	ENSDARG00000008333	2:129175-133115	25.8961	10.3747	-1.31967	-9.17883	5e-05	0.000238134	Down	znfl2a	_	molecular_function:nucleic acid binding(GO:0003676);molecular_function:metal ion binding(GO:0046872)
ENSDART00000004357	ENSDARG00000077405	23:45487011-45605143	15.8341	0.0296003	-9.06321	-8.69434	0.01265	0.0358977	Down	si:ch211-116m6.3	_	_
ENSDART00000004416	ENSDARG00000094171	22:14336628-14451352	0.13228	0.558503	2.07797	3.31345	0.0003	0.00126972	Ups	lrp1ba	_	_
ENSDART00000004498	ENSDARG00000037203	9:748315-760069	3.75514	1.864	-1.01046	-7.29328	5e-05	0.000238134	Down	insig2	_	cellular_component:endoplasmic reticulum(GO:0005783);cellular_component:endoplasmic reticulum membrane(GO:0005789);biological_process:lipid metabolic process(GO:0006629);biological_process:steroid metabolic process(GO:0008202);biological_process:cholesterol metabolic process(GO:0008203);cellular_component:membrane(GO:0016020);cellular_component:integral component of membrane(GO:0016021)
ENSDART00000004712	ENSDARG00000011998	2:32777911-32785733	19.8507	40.0818	1.01376	13.1455	5e-05	0.000238134	Ups	bfsp2	K10379	molecular_function:structural molecule activity(GO:0005198);cellular_component:intermediate filament(GO:0005882);biological_process:intermediate filament cytoskeleton organization(GO:0045104)
ENSDART00000004716	ENSDARG00000019763	6:8119582-8126977	66.0664	6.67706	-3.30663	-23.4604	5e-05	0.000238134	Down	acp5a	K14379	molecular_function:acid phosphatase activity(GO:0003993);cellular_component:membrane(GO:0016020);cellular_component:integral component of membrane(GO:0016021);molecular_function:hydrolase activity(GO:0016787)
ENSDART00000004727	ENSDARG00000007080	6:36403814-36413793	0.0712094	0.715964	3.32975	2.65908	0.01785	0.0483983	Ups	rhcgl1	K06580	cellular_component:integral component of plasma membrane(GO:0005887);biological_process:sodium ion transport(GO:0006814);molecular_function:ammonium transmembrane transporter activity(GO:0008519);molecular_function:ammonium transmembrane transporter activity(GO:0008519);biological_process:organic cation transport(GO:0015695);biological_process:ammonium transport(GO:0015696);biological_process:amm…
ENSDART00000004756	ENSDARG00000010478	20:54177900-54222597	79.6155	27.7595	-1.52007	-20.8774	5e-05	0.000238134	Down	hsp90aa1.1	_	molecular_function:nucleotide binding(GO:0000166);molecular_function:protein binding(GO:0005515);molecular_function:ATP binding(GO:0005524);cellular_component:cytoplasm(GO:0005737);biological_process:protein folding(GO:0006457);biological_process:response to stress(GO:0006950);biological_process:muscle organ development(GO:0007517);biological_process:response to metal ion(GO:0010038);biological_p…
ENSDART00000005105	ENSDARG00000002165	24:12801383-12810063	0.360033	1.84054	2.35393	2.68093	0.0093	0.0274764	Ups	psme1	K06696	cellular_component:proteasome complex(GO:0000502);cellular_component:proteasome complex(GO:0000502);cellular_component:cytoplasm(GO:0005737);cellular_component:proteasome activator complex(GO:0008537);molecular_function:endopeptidase activator activity(GO:0061133);biological_process:regulation of proteasomal protein catabolic process(GO:0061136);biological_process:regulation of G1/S transition of…
ENSDART00000005118	ENSDARG00000013302	8:40143957-40149403	5.42093	11.071	1.03017	6.64936	5e-05	0.000238134	Ups	gpx8	K00432	molecular_function:peroxidase activity(GO:0004601);molecular_function:glutathione peroxidase activity(GO:0004602);biological_process:response to oxidative stress(GO:0006979);cellular_component:membrane(GO:0016020);cellular_component:integral component of membrane(GO:0016021);molecular_function:oxidoreductase activity(GO:0016491);biological_process:oxidation-reduction process(GO:0055114)
ENSDART00000005382	ENSDARG00000013576	2:36957291-36959531	3.48101	1.17598	-1.56565	-3.99656	5e-05	0.000238134	Down	gadd45bb	K04402	biological_process:activation of MAPKKK activity(GO:0000185);biological_process:somitogenesis(GO:0001756);biological_process:somitogenesis(GO:0001756);cellular_component:nucleus(GO:0005634);cellular_component:nucleus(GO:0005634);cellular_component:cytoplasm(GO:0005737);biological_process:response to stress(GO:0006950);biological_process:regulation of cell cycle(GO:0051726);biological_process:regu…
ENSDART00000005491	ENSDARG00000006120	15:27431517-27438464	2.20389	5.83261	1.40409	4.15325	5e-05	0.000238134	Ups	tbx2b	_	biological_process:heart looping(GO:0001947);biological_process:cardiac chamber development(GO:0003205);molecular_function:DNA binding(GO:0003677);molecular_function:sequence-specific DNA binding transcription factor activity(GO:0003700);cellular_component:nucleus(GO:0005634);biological_process:transcription, DNA-templated(GO:0006351);biological_process:regulation of transcription, DNA-templated(…
ENSDART00000005573	ENSDARG00000074248	6:9663143-9680995	3.94535	0.851069	-2.2128	-4.5289	5e-05	0.000238134	Down	tmem237b	_	molecular_function:molecular_function(GO:0003674);cellular_component:cilium(GO:0005929);cellular_component:membrane(GO:0016020);cellular_component:integral component of membrane(GO:0016021);biological_process:cell projection organization(GO:0030030);biological_process:regulation of Wnt signaling pathway(GO:0030111);cellular_component:ciliary transition zone(GO:0035869);cellular_component:cell pro…
ENSDART00000005638	ENSDARG00000056036	5:28373110-28402105	0.655729	2.98297	2.18558	9.88741	5e-05	0.000238134	Ups	stxbp1b	_	biological_process:vesicle docking involved in exocytosis(GO:0006904);biological_process:vesicle-mediated transport(GO:0016192)
ENSDART00000005641	ENSDARG00000014018	15:27770532-27777699	19.1046	41.2779	1.11145	16.4098	5e-05	0.000238134	Ups	lhx1a	K09372	biological_process:ureteric bud development(GO:0001657);biological_process:ectoderm formation(GO:0001705);biological_process:endoderm formation(GO:0001706);molecular_function:DNA binding(GO:0003677);molecular_function:sequence-specific DNA binding transcription factor activity(GO:0003700);molecular_function:transcription corepressor activity(GO:0003714);cellular_component:nucleus(GO:0005634);cell…
ENSDART00000005895	ENSDARG00000018263	1:9270377-9280654	0.528732	1.38998	1.39446	3.13799	0.00035	0.00146175	Ups	pdia2	K09581	molecular_function:protein disulfide isomerase activity(GO:0003756);molecular_function:protein disulfide isomerase activity(GO:0003756);cellular_component:endoplasmic reticulum(GO:0005783);cellular_component:endoplasmic reticulum(GO:0005783);biological_process:protein folding(GO:0006457);molecular_function:isomerase activity(GO:0016853);molecular_function:peptidyl-proline 4-dioxygenase activity(G…
ENSDART00000006284	ENSDARG00000004763	10:35496091-35508331	4.51509	1.34801	-1.74392	-6.37645	5e-05	0.000238134	Down	hhla2a.2	_	cellular_component:membrane(GO:0016020);cellular_component:integral component of membrane(GO:0016021)
ENSDART00000006435	ENSDARG00000006607	6:43905672-43909785	1.2273	2.94157	1.2611	6.72287	5e-05	0.000238134	Ups	gpr27	K04300	molecular_function:G-protein coupled receptor activity(GO:0004930);molecular_function:G-protein coupled receptor activity(GO:0004930);cellular_component:plasma membrane(GO:0005886);biological_process:G-protein coupled receptor signaling pathway(GO:0007186);cellular_component:membrane(GO:0016020);cellular_component:integral component of membrane(GO:0016021)
ENSDART00000006615	ENSDARG00000013310	24:25768120-25843795	2.87888	1.33878	-1.10459	-4.85558	5e-05	0.000238134	Down	map3k15	_	molecular_function:nucleotide binding(GO:0000166);molecular_function:protein kinase activity(GO:0004672);molecular_function:MAP kinase kinase kinase activity(GO:0004709);molecular_function:ATP binding(GO:0005524);biological_process:protein phosphorylation(GO:0006468);molecular_function:kinase activity(GO:0016301);biological_process:phosphorylation(GO:0016310);molecular_function:transferase activi…
ENSDART00000006971	ENSDARG00000010385	21:39417461-39501679	2.57447	8.00065	1.63584	2.57007	0.00055	0.00220876	Ups	sept4a	K16943	molecular_function:nucleotide binding(GO:0000166);molecular_function:GTP binding(GO:0005525)
ENSDART00000006990	ENSDARG00000004979	13:2236615-2259761	11.4305	5.49857	-1.05576	-7.39815	5e-05	0.000238134	Down	elovl5	K10244	cellular_component:endoplasmic reticulum(GO:0005783);cellular_component:endoplasmic reticulum membrane(GO:0005789);cellular_component:integral component of plasma membrane(GO:0005887);biological_process:lipid metabolic process(GO:0006629);biological_process:fatty acid metabolic process(GO:0006631);biological_process:fatty acid biosynthetic process(GO:0006633);biological_process:unsaturated fatty …
ENSDART00000007262	ENSDARG00000015076	1:46754799-46757618	14.7582	7.02656	-1.07063	-9.98427	5e-05	0.000238134	Down	cx44.1	K07617	cellular_component:plasma membrane(GO:0005886);cellular_component:integral component of plasma membrane(GO:0005887);cellular_component:gap junction(GO:0005921);cellular_component:connexon complex(GO:0005922);cellular_component:connexon complex(GO:0005922);biological_process:cell communication(GO:0007154);cellular_component:membrane(GO:0016020);cellular_component:integral component of membrane(GO:…
ENSDART00000007271	ENSDARG00000003940	17:24699799-24708891	9.12506	3.65636	-1.31942	-6.63906	5e-05	0.000238134	Down	mtfr1l	_	biological_process:mitochondrial fission(GO:0000266);molecular_function:molecular_function(GO:0003674);cellular_component:mitochondrion(GO:0005739);biological_process:aerobic respiration(GO:0009060)
ENSDART00000007293	ENSDARG00000007344	3:21110045-21111912	5.70011	2.81561	-1.01754	-3.98009	5e-05	0.000238134	Down	tcap	K19879	cellular_component:Z disc(GO:0030018);biological_process:T-tubule organization(GO:0033292);biological_process:muscle cell development(GO:0055001);biological_process:heart contraction(GO:0060047)
ENSDART00000007498	ENSDARG00000052708	6:54796408-54816373	2.74693	0.327362	-3.06886	-4.71781	5e-05	0.000238134	Down	tnni1b	K10371	biological_process:skeletal muscle contraction(GO:0003009);molecular_function:molecular_function(GO:0003674);cellular_component:troponin complex(GO:0005861);cellular_component:troponin complex(GO:0005861);biological_process:heart development(GO:0007507);biological_process:cardiac muscle contraction(GO:0060048)
ENSDART00000007624	ENSDARG00000059960	8:47497107-47633527	1.00393	2.89087	1.52585	6.88643	5e-05	0.000238134	Ups	plch2a	K19006	molecular_function:phosphatidylinositol phospholipase C activity(GO:0004435);molecular_function:phospholipase C activity(GO:0004629);molecular_function:signal transducer activity(GO:0004871);molecular_function:calcium ion binding(GO:0005509);biological_process:lipid metabolic process(GO:0006629);biological_process:signal transduction(GO:0007165);molecular_function:phosphoric diester hydrolase act…
ENSDART00000007770	ENSDARG00000018611	1:30799421-30801521	6.67911	1.74363	-1.93756	-7.84032	5e-05	0.000238134	Down	lbx1b	_	molecular_function:DNA binding(GO:0003677);cellular_component:nucleus(GO:0005634);biological_process:regulation of transcription, DNA-templated(GO:0006355);molecular_function:sequence-specific DNA binding(GO:0043565)
ENSDART00000007777	ENSDARG00000079182	17:9691074-9734037	1.09173	2.48442	1.18629	4.03206	5e-05	0.000238134	Ups	NPAS3	K09098	_
ENSDART00000007856	ENSDARG00000001976	18:25667066-25759104	1.15443	2.4278	1.07247	3.1065	5e-05	0.000238134	Ups	fkbp16	K09574	biological_process:protein folding(GO:0006457);cellular_component:membrane(GO:0016020);cellular_component:integral component of membrane(GO:0016021)
ENSDART00000008248	ENSDARG00000016439	10:24452523-24524019	0.573811	1.71263	1.57756	3.38029	0.00085	0.00328059	Ups	slc7a1	K13863	molecular_function:L-ornithine transmembrane transporter activity(GO:0000064);biological_process:amino acid transmembrane transport(GO:0003333);cellular_component:integral component of plasma membrane(GO:0005887);biological_process:amino acid transport(GO:0006865);molecular_function:amino acid transmembrane transporter activity(GO:0015171);molecular_function:arginine transmembrane transporter act…
ENSDART00000008373	ENSDARG00000015355	14:30399161-30407372	2.40479	0.933612	-1.36501	-6.12278	5e-05	0.000238134	Down	fosl1a	K04502	molecular_function:RNA polymerase II core promoter proximal region sequence-specific DNA binding(GO:0000978);molecular_function:RNA polymerase II core promoter proximal region sequence-specific DNA binding transcription factor activity(GO:0000982);molecular_function:DNA binding(GO:0003677);molecular_function:sequence-specific DNA binding transcription factor activity(GO:0003700);cellular_componen…
ENSDART00000008590	ENSDARG00000013056	20:27150432-27187053	6.91478	3.25849	-1.08548	-6.6129	5e-05	0.000238134	Down	itpk1a	K00913	molecular_function:nucleotide binding(GO:0000166);molecular_function:magnesium ion binding(GO:0000287);molecular_function:ATP binding(GO:0005524);cellular_component:intracellular(GO:0005622);molecular_function:kinase activity(GO:0016301);biological_process:phosphorylation(GO:0016310);molecular_function:transferase activity(GO:0016740);molecular_function:isomerase activity(GO:0016853);biological_p…
ENSDART00000008816	ENSDARG00000011235	17:44130893-44139202	6.12712	14.6606	1.25866	3.54778	5e-05	0.000238134	Ups	otx2	K18490	biological_process:retinal pigment epithelium development(GO:0003406);molecular_function:DNA binding(GO:0003677);molecular_function:sequence-specific DNA binding transcription factor activity(GO:0003700);cellular_component:nucleus(GO:0005634);biological_process:regulation of transcription, DNA-templated(GO:0006355);biological_process:multicellular organismal development(GO:0007275);biological_pro…
ENSDART00000008988	ENSDARG00000004796	3:54594484-54620244	5.49052	11.0356	1.00715	10.9748	5e-05	0.000238134	Ups	mgrn1b	K10604	molecular_function:zinc ion binding(GO:0008270)
ENSDART00000009104	ENSDARG00000004861	17:29777834-29885224	0.881376	1.8149	1.04206	2.54708	0.0011	0.0041589	Ups	esrrga	K08554	molecular_function:DNA binding(GO:0003677);molecular_function:sequence-specific DNA binding transcription factor activity(GO:0003700);molecular_function:sequence-specific DNA binding transcription factor activity(GO:0003700);molecular_function:steroid hormone receptor activity(GO:0003707);molecular_function:steroid binding(GO:0005496);cellular_component:nucleus(GO:0005634);cellular_component:nucl…
ENSDART00000009564	ENSDARG00000075713	15:2218530-2224850	4.63335	12.4649	1.42774	8.98062	5e-05	0.000238134	Ups	shox2	K09331	molecular_function:DNA binding(GO:0003677);cellular_component:nucleus(GO:0005634);biological_process:regulation of transcription, DNA-templated(GO:0006355);biological_process:heart development(GO:0007507);biological_process:regulation of heart contraction(GO:0008016);molecular_function:sequence-specific DNA binding(GO:0043565)
ENSDART00000009689	ENSDARG00000075963	19:7153928-7182175	0.733004	2.61066	1.83252	4.88227	5e-05	0.000238134	Ups	mhc1uba	_	molecular_function:antigen binding(GO:0003823);cellular_component:plasma membrane(GO:0005886);cellular_component:membrane(GO:0016020);cellular_component:integral component of membrane(GO:0016021);biological_process:antigen processing and presentation(GO:0019882)
ENSDART00000010068	ENSDARG00000006811	12:15159553-15166784	0.204312	0.757063	1.88964	2.58792	0.01275	0.0361422	Ups	sult1st6	K01025	molecular_function:N-acetylglucosamine 6-O-sulfotransferase activity(GO:0001517);molecular_function:N-acetylgalactosamine 4-O-sulfotransferase activity(GO:0001537);molecular_function:estrone sulfotransferase activity(GO:0004304);molecular_function:heparan sulfate 2-O-sulfotransferase activity(GO:0004394);cellular_component:cellular_component(GO:0005575);molecular_function:sulfotransferase activit…
ENSDART00000010124	ENSDARG00000075831	7:23937453-23965207	22.5091	11.0172	-1.03076	-18.452	5e-05	0.000238134	Down	slc7a8a	K13781	_
ENSDART00000010126	ENSDARG00000003899	24:20947736-21135124	1.992	0.964727	-1.04602	-2.2149	0.00085	0.00328059	Down	zdhhc23b	K18932	molecular_function:zinc ion binding(GO:0008270);cellular_component:membrane(GO:0016020);cellular_component:integral component of membrane(GO:0016021);molecular_function:transferase activity(GO:0016740);molecular_function:transferase activity, transferring acyl groups(GO:0016746);molecular_function:protein-cysteine S-palmitoyltransferase activity(GO:0019706)
ENSDART00000010293	ENSDARG00000005924	20:27397941-27482616	17.7358	8.28585	-1.09794	-4.82397	5e-05	0.000238134	Down	serpina10a	_	molecular_function:serine-type endopeptidase inhibitor activity(GO:0004867);cellular_component:extracellular space(GO:0005615);cellular_component:extracellular space(GO:0005615)
ENSDART00000010395	ENSDARG00000014794	3:58096745-58133544	15.5706	7.38537	-1.07608	-2.01147	0.0006	0.00238787	Down	uqcrc2a	K00415	molecular_function:catalytic activity(GO:0003824);molecular_function:metalloendopeptidase activity(GO:0004222);cellular_component:mitochondrial respiratory chain complex III(GO:0005750);biological_process:mitochondrial electron transport, ubiquinol to cytochrome c(GO:0006122);molecular_function:zinc ion binding(GO:0008270);biological_process:aerobic respiration(GO:0009060);biological_process:prot…
ENSDART00000010537	ENSDARG00000010312	22:38220812-38246841	20.2424	8.74336	-1.21112	-14.9771	5e-05	0.000238134	Down	cp	K13624	molecular_function:copper ion binding(GO:0005507);cellular_component:nucleus(GO:0005634);cellular_component:cytoplasm(GO:0005737);molecular_function:oxidoreductase activity(GO:0016491);molecular_function:metal ion binding(GO:0046872);biological_process:oxidation-reduction process(GO:0055114)
ENSDART00000010684	ENSDARG00000009724	11:15090671-15162571	1.53097	3.88242	1.34251	3.45574	5e-05	0.000238134	Ups	rpn2	_	molecular_function:dolichyl-diphosphooligosaccharide-protein glycotransferase activity(GO:0004579);biological_process:protein N-linked glycosylation(GO:0006487);biological_process:protein N-linked glycosylation(GO:0006487);cellular_component:oligosaccharyltransferase complex(GO:0008250);cellular_component:oligosaccharyltransferase complex(GO:0008250);cellular_component:membrane(GO:0016020);cellul…
ENSDART00000010942	ENSDARG00000043905	21:41807148-41848869	2.962	5.99623	1.01749	2.38392	0.0008	0.00310639	Ups	rnf14	K11971	cellular_component:ubiquitin ligase complex(GO:0000151);biological_process:protein polyubiquitination(GO:0000209);molecular_function:ubiquitin-protein transferase activity(GO:0004842);cellular_component:nucleus(GO:0005634);cellular_component:cytoplasm(GO:0005737);molecular_function:zinc ion binding(GO:0008270);biological_process:protein ubiquitination(GO:0016567);molecular_function:ubiquitin conj…
ENSDART00000011004	ENSDARG00000015997	23:35660840-35691457	2.24603	0.208952	-3.42614	-3.70253	0.0068	0.0208669	Down	mfsd5	_	cellular_component:plasma membrane(GO:0005886);biological_process:transport(GO:0006810);biological_process:ion transport(GO:0006811);molecular_function:molybdate ion transmembrane transporter activity(GO:0015098);biological_process:molybdate ion transport(GO:0015689);cellular_component:membrane(GO:0016020);cellular_component:integral component of membrane(GO:0016021)
ENSDART00000011183	ENSDARG00000001782	11:8119828-8141055	4.23124	2.01009	-1.07382	-3.03259	0.00025	0.00107263	Down	prkacba	K04345	molecular_function:nucleotide binding(GO:0000166);molecular_function:protein kinase activity(GO:0004672);molecular_function:protein serine/threonine kinase activity(GO:0004674);molecular_function:ATP binding(GO:0005524);cellular_component:cellular_component(GO:0005575);biological_process:protein phosphorylation(GO:0006468);molecular_function:kinase activity(GO:0016301);biological_process:phosphor…
ENSDART00000011480	ENSDARG00000034757	14:30086641-30111904	0.434625	0.919731	1.08144	2.57752	0.0011	0.0041589	Ups	zdhhc2	K20028	molecular_function:zinc ion binding(GO:0008270);cellular_component:membrane(GO:0016020);cellular_component:integral component of membrane(GO:0016021);molecular_function:transferase activity(GO:0016740);molecular_function:transferase activity, transferring acyl groups(GO:0016746);molecular_function:protein-cysteine S-palmitoyltransferase activity(GO:0019706)
ENSDART00000011837	ENSDARG00000019566	9:44489978-44493329	10.3941	28.7166	1.46612	5.11807	5e-05	0.000238134	Ups	neurod1	K08033	molecular_function:DNA binding(GO:0003677);cellular_component:nucleus(GO:0005634);cellular_component:cytoplasm(GO:0005737);biological_process:transcription, DNA-templated(GO:0006351);biological_process:regulation of transcription, DNA-templated(GO:0006355);biological_process:multicellular organismal development(GO:0007275);biological_process:nervous system development(GO:0007399);biological_proce…
ENSDART00000012104	ENSDARG00000010791	1:53353713-53402369	44.2964	18.7798	-1.23801	-19.4567	5e-05	0.000238134	Down	dla	K06051	biological_process:angiogenesis(GO:0001525);molecular_function:calcium ion binding(GO:0005509);molecular_function:protein binding(GO:0005515);cellular_component:plasma membrane(GO:0005886);cellular_component:cell cortex(GO:0005938);biological_process:cell communication(GO:0007154);biological_process:Notch signaling pathway(GO:0007219);biological_process:multicellular organismal development(GO:000…
ENSDART00000012421	ENSDARG00000045172	12:17360732-17371011	0.868895	1.80805	1.05718	2.44924	0.0029	0.00982901	Ups	minpp1b	K03103	molecular_function:acid phosphatase activity(GO:0003993);molecular_function:acid phosphatase activity(GO:0003993);cellular_component:cellular_component(GO:0005575);molecular_function:phosphatase activity(GO:0016791);molecular_function:inositol phosphate phosphatase activity(GO:0052745)
ENSDART00000012580	ENSDARG00000016141	7:35076998-35108709	0.364161	0.955183	1.3912	4.63873	5e-05	0.000238134	Ups	slc6a2	K05035	molecular_function:neurotransmitter:sodium symporter activity(GO:0005328);molecular_function:dopamine:sodium symporter activity(GO:0005330);molecular_function:norepinephrine transmembrane transporter activity(GO:0005333);cellular_component:integral component of plasma membrane(GO:0005887);biological_process:transport(GO:0006810);biological_process:neurotransmitter transport(GO:0006836);molecular_…
ENSDART00000012581	ENSDARG00000003750	20:25546735-25613003	35.743	12.2058	-1.5501	-23.8415	5e-05	0.000238134	Down	pfas	K01952	molecular_function:phosphoribosylformylglycinamidine synthase activity(GO:0004642);molecular_function:phosphoribosylformylglycinamidine synthase activity(GO:0004642);molecular_function:ATP binding(GO:0005524);cellular_component:cytoplasm(GO:0005737);biological_process:purine nucleotide biosynthetic process(GO:0006164);biological_process:'de novo' IMP biosynthetic process(GO:0006189);biological_pr…
ENSDART00000012673	ENSDARG00000004358	16:12131640-12158860	0.200874	9.65444	5.58683	8.44497	5e-05	0.000238134	Ups	gnb3a	K07825	biological_process:signal transduction(GO:0007165)
ENSDART00000012747	ENSDARG00000019185	9:17340936-17379010	0.982698	2.27836	1.21318	3.3157	0.0001	0.000458341	Ups	slain1a	K16580	_
ENSDART00000013003	ENSDARG00000012667	20:48191599-48230662	8.10638	21.7339	1.42282	3.70409	5e-05	0.000238134	Ups	tfap2b	_	biological_process:negative regulation of transcription from RNA polymerase II promoter(GO:0000122);molecular_function:RNA polymerase II regulatory region sequence-specific DNA binding(GO:0000977);molecular_function:sequence-specific DNA binding RNA polymerase II transcription factor activity(GO:0000981);molecular_function:RNA polymerase II core promoter sequence-specific DNA binding transcriptio…
ENSDART00000013021	ENSDARG00000016065	1:17200006-17205290	0.310227	0.850584	1.45513	3.42433	0.00015	0.000666878	Ups	tlr3	K05401	biological_process:positive regulation of cytokine production(GO:0001819);biological_process:toll-like receptor signaling pathway(GO:0002224);biological_process:immune system process(GO:0002376);biological_process:MyD88-independent toll-like receptor signaling pathway(GO:0002756);molecular_function:double-stranded RNA binding(GO:0003725);molecular_function:double-stranded RNA binding(GO:0003725);…
ENSDART00000013024	ENSDARG00000007356	1:15700139-15701877	0.578589	1.47419	1.34931	2.36252	0.0086	0.0256031	Ups	fgf20a	_	molecular_function:receptor binding(GO:0005102);molecular_function:growth factor activity(GO:0008083);biological_process:fin regeneration(GO:0031101);biological_process:regulation of bone remodeling(GO:0046850);biological_process:anatomical structure homeostasis(GO:0060249)
ENSDART00000013059	ENSDARG00000016016	8:52328047-52363850	3.95245	1.90764	-1.05095	-2.75409	0.00015	0.000666878	Down	dbnlb	K20520	molecular_function:actin binding(GO:0003779);cellular_component:intracellular(GO:0005622);biological_process:receptor-mediated endocytosis(GO:0006898);biological_process:synapse assembly(GO:0007416);biological_process:neuron projection morphogenesis(GO:0048812);molecular_function:actin filament binding(GO:0051015);biological_process:ruffle assembly(GO:0097178)
ENSDART00000013082	ENSDARG00000018788	18:25040962-25065314	6.19825	2.39784	-1.37012	-7.52752	5e-05	0.000238134	Down	st8sia2	K06612	cellular_component:Golgi apparatus(GO:0005794);biological_process:protein glycosylation(GO:0006486);molecular_function:sialyltransferase activity(GO:0008373);molecular_function:sialyltransferase activity(GO:0008373);molecular_function:sialyltransferase activity(GO:0008373);cellular_component:membrane(GO:0016020);cellular_component:integral component of membrane(GO:0016021);molecular_function:tran…
ENSDART00000013117	ENSDARG00000011640	24:7657260-7670037	2.07476	6.48043	1.64314	7.81037	5e-05	0.000238134	Ups	syt5b	_	molecular_function:calcium ion binding(GO:0005509);molecular_function:calcium-dependent phospholipid binding(GO:0005544);cellular_component:plasma membrane(GO:0005886);biological_process:vesicle fusion(GO:0006906);cellular_component:membrane(GO:0016020);cellular_component:integral component of membrane(GO:0016021);biological_process:regulation of calcium ion-dependent exocytosis(GO:0017158);molec…
ENSDART00000013642	ENSDARG00000032705	11:42822026-42824168	8.844	19.5377	1.14349	11.3602	5e-05	0.000238134	Ups	foxg1b	_	molecular_function:sequence-specific DNA binding RNA polymerase II transcription factor activity(GO:0000981);molecular_function:DNA binding(GO:0003677);molecular_function:sequence-specific DNA binding transcription factor activity(GO:0003700);cellular_component:nucleus(GO:0005634);biological_process:regulation of transcription, DNA-templated(GO:0006355);molecular_function:sequence-specific DNA bi…
ENSDART00000013714	ENSDARG00000013477	11:25174297-25181240	10.4677	3.82574	-1.45213	-8.3775	5e-05	0.000238134	Down	gata1a	K09182	molecular_function:RNA polymerase II regulatory region sequence-specific DNA binding(GO:0000977);molecular_function:RNA polymerase II transcription factor binding(GO:0001085);molecular_function:RNA polymerase II transcription regulatory region sequence-specific DNA binding transcription factor activity involved in positive regulation of transcription(GO:0001228);molecular_function:chromatin bindi…
ENSDART00000013785	ENSDARG00000010658	7:40683237-40734700	24.3979	9.42069	-1.37285	-14.4649	5e-05	0.000238134	Down	insig1	_	cellular_component:endoplasmic reticulum(GO:0005783);cellular_component:endoplasmic reticulum membrane(GO:0005789);biological_process:lipid metabolic process(GO:0006629);biological_process:steroid metabolic process(GO:0008202);biological_process:cholesterol metabolic process(GO:0008203);cellular_component:membrane(GO:0016020);cellular_component:integral component of membrane(GO:0016021)
ENSDART00000013835	ENSDARG00000014171	22:10094046-10098262	4.76917	11.8207	1.3095	4.0051	5e-05	0.000238134	Ups	bloc1s1	K20185	cellular_component:mitochondrion(GO:0005739);biological_process:endosomal transport(GO:0016197);cellular_component:BLOC-1 complex(GO:0031083);cellular_component:BLOC-1 complex(GO:0031083)
ENSDART00000013863	ENSDARG00000018478	2:23004135-23033000	1.20842	0.432047	-1.48387	-2.81657	0.00145	0.00531371	Down	agxtb	K00830	molecular_function:catalytic activity(GO:0003824);molecular_function:serine-pyruvate transaminase activity(GO:0004760);molecular_function:serine-pyruvate transaminase activity(GO:0004760);molecular_function:serine-pyruvate transaminase activity(GO:0004760);cellular_component:mitochondrion(GO:0005739);cellular_component:peroxisome(GO:0005777);cellular_component:peroxisome(GO:0005777);biological_pr…
ENSDART00000014020	ENSDARG00000014190	2:5814470-5817294	31.3014	13.4187	-1.22198	-5.97202	5e-05	0.000238134	Down	sst2	_	molecular_function:hormone activity(GO:0005179);molecular_function:hormone activity(GO:0005179);cellular_component:extracellular region(GO:0005576);cellular_component:extracellular space(GO:0005615);biological_process:cell surface receptor signaling pathway(GO:0007166);biological_process:cell-cell signaling(GO:0007267);biological_process:regulation of cell migration(GO:0030334)
ENSDART00000014062	ENSDARG00000009438	11:22436005-22439025	3.5774	11.7437	1.71491	6.83303	5e-05	0.000238134	Ups	myog	K18483	molecular_function:RNA polymerase II core promoter proximal region sequence-specific DNA binding(GO:0000978);molecular_function:RNA polymerase II transcription regulatory region sequence-specific DNA binding transcription factor activity involved in positive regulation of transcription(GO:0001228);molecular_function:DNA binding(GO:0003677);molecular_function:RNA polymerase II distal enhancer sequ…
ENSDART00000014223	ENSDARG00000015033	21:30054721-30074439	2.7107	0.749826	-1.85404	-6.10509	5e-05	0.000238134	Down	slc23a1	K14611	molecular_function:transporter activity(GO:0005215);biological_process:transport(GO:0006810);biological_process:L-ascorbic acid transport(GO:0015882);cellular_component:membrane(GO:0016020);cellular_component:integral component of membrane(GO:0016021);biological_process:transmembrane transport(GO:0055085);molecular_function:sodium-dependent L-ascorbate transmembrane transporter activity(GO:007089…
ENSDART00000014439	ENSDARG00000001760	16:16713264-16741787	0.0668312	0.782329	3.54918	5.23706	5e-05	0.000238134	Ups	tnxba	_	_
ENSDART00000014632	ENSDARG00000005456	7:51883754-52010260	7.26441	3.065	-1.24496	-3.26743	5e-05	0.000238134	Down	katnb1	K18643	cellular_component:spindle pole(GO:0000922);cellular_component:cytoplasm(GO:0005737);cellular_component:centrosome(GO:0005813);cellular_component:cytoskeleton(GO:0005856);cellular_component:microtubule(GO:0005874);biological_process:cell cycle(GO:0007049);biological_process:mitotic nuclear division(GO:0007067);biological_process:brain development(GO:0007420);molecular_function:microtubule binding…
ENSDART00000014669	ENSDARG00000030781	10:44146554-44180594	8.33403	16.9067	1.02051	5.14809	5e-05	0.000238134	Ups	acads	K00248	molecular_function:acyl-CoA dehydrogenase activity(GO:0003995);biological_process:metabolic process(GO:0008152);molecular_function:oxidoreductase activity(GO:0016491);molecular_function:oxidoreductase activity, acting on the CH-CH group of donors(GO:0016627);molecular_function:flavin adenine dinucleotide binding(GO:0050660);biological_process:oxidation-reduction process(GO:0055114)
ENSDART00000014749	ENSDARG00000011422	10:33462958-33596476	0.600499	0.186812	-1.68457	-3.97405	5e-05	0.000238134	Down	ryr1a	K04961	molecular_function:ion channel activity(GO:0005216);molecular_function:ryanodine-sensitive calcium-release channel activity(GO:0005219);molecular_function:ryanodine-sensitive calcium-release channel activity(GO:0005219);molecular_function:calcium channel activity(GO:0005262);molecular_function:calcium ion binding(GO:0005509);molecular_function:calcium ion binding(GO:0005509);cellular_component:sm…
ENSDART00000015046	ENSDARG00000015559	1:46768490-46794128	68.3228	26.1736	-1.38425	-19.812	5e-05	0.000238134	Down	fstl1a	_	molecular_function:calcium ion binding(GO:0005509);cellular_component:extracellular region(GO:0005576);biological_process:regulation of BMP signaling pathway(GO:0030510);biological_process:notochord development(GO:0030903);biological_process:notochord cell differentiation(GO:0060034)
ENSDART00000015884	ENSDARG00000015349	7:48515440-48532406	1.9375	3.9185	1.01611	5.0673	5e-05	0.000238134	Ups	mfge8a	_	molecular_function:calcium ion binding(GO:0005509);cellular_component:cellular_component(GO:0005575)
ENSDART00000016002	ENSDARG00000015759	14:41102223-41111138	127.349	60.5459	-1.07269	-23.1777	5e-05	0.000238134	Down	tspan7	_	cellular_component:integral component of plasma membrane(GO:0005887);biological_process:cell surface receptor signaling pathway(GO:0007166);cellular_component:membrane(GO:0016020);cellular_component:integral component of membrane(GO:0016021)
ENSDART00000016053	ENSDARG00000020600	17:35330841-35404744	1.03626	2.87511	1.47223	5.85519	5e-05	0.000238134	Ups	rnf144aa	K11975	cellular_component:ubiquitin ligase complex(GO:0000151);biological_process:protein polyubiquitination(GO:0000209);molecular_function:ubiquitin-protein transferase activity(GO:0004842);cellular_component:Golgi apparatus(GO:0005794);molecular_function:zinc ion binding(GO:0008270);molecular_function:UDP-N-acetylmuramoylalanyl-D-glutamyl-2,6-diaminopimelate-D-alanyl-D-alanine ligase activity(GO:00087…
ENSDART00000016071	ENSDARG00000017748	2:15459827-15529330	2.46472	0.774597	-1.66991	-2.24467	0.00265	0.0090748	Down	arhgap29b	K20644	molecular_function:GTPase activator activity(GO:0005096);biological_process:signal transduction(GO:0007165);biological_process:intracellular signal transduction(GO:0035556);molecular_function:metal ion binding(GO:0046872)
ENSDART00000016208	ENSDARG00000075211	2:22107584-22162635	1.32506	0.467708	-1.50238	-2.56305	0.00105	0.00398664	Down	chd7	K14437	biological_process:somitogenesis(GO:0001756);biological_process:heart looping(GO:0001947);molecular_function:ATP binding(GO:0005524);cellular_component:nucleus(GO:0005634);biological_process:determination of left/right symmetry(GO:0007368);biological_process:rRNA transcription(GO:0009303);biological_process:neural crest formation(GO:0014029);molecular_function:hydrolase activity, acting on acid a…
ENSDART00000016350	ENSDARG00000014068	1:54030015-54041212	4.78242	11.4081	1.25425	5.51773	5e-05	0.000238134	Ups	pgam1b	K01834	molecular_function:catalytic activity(GO:0003824);molecular_function:bisphosphoglycerate mutase activity(GO:0004082);molecular_function:phosphoglycerate mutase activity(GO:0004619);cellular_component:cytosol(GO:0005829);biological_process:gluconeogenesis(GO:0006094);biological_process:glycolytic process(GO:0006096);biological_process:glycolytic process(GO:0006096);biological_process:metabolic pro…
ENSDART00000016604	ENSDARG00000014031	13:551336-581285	6.97537	2.8434	-1.29465	-11.4223	5e-05	0.000238134	Down	abcc2	K05666	molecular_function:nucleotide binding(GO:0000166);molecular_function:transporter activity(GO:0005215);molecular_function:ATP binding(GO:0005524);cellular_component:integral component of plasma membrane(GO:0005887);biological_process:transport(GO:0006810);molecular_function:organic anion transmembrane transporter activity(GO:0008514);cellular_component:membrane(GO:0016020);cellular_component:integ…
ENSDART00000016960	ENSDARG00000020656	13:40689121-40833599	1.77545	0.695899	-1.35123	-2.20854	0.00555	0.0174179	Down	prkg1a	K07376	molecular_function:nucleotide binding(GO:0000166);molecular_function:protein kinase activity(GO:0004672);molecular_function:protein serine/threonine kinase activity(GO:0004674);molecular_function:cGMP-dependent protein kinase activity(GO:0004692);molecular_function:ATP binding(GO:0005524);biological_process:protein phosphorylation(GO:0006468);molecular_function:kinase activity(GO:0016301);biologi…
ENSDART00000016983	ENSDARG00000010029	18:28586399-28901951	0.391842	0.9982	1.34906	3.52915	5e-05	0.000238134	Ups	spon1a	_	molecular_function:molecular_function(GO:0003674)
ENSDART00000017122	ENSDARG00000037091	14:29908698-30049831	2.76527	5.75985	1.05861	4.80842	5e-05	0.000238134	Ups	asah1a	K12348	cellular_component:lysosome(GO:0005764);biological_process:lipid metabolic process(GO:0006629);molecular_function:hydrolase activity(GO:0016787)
ENSDART00000017240	ENSDARG00000043806	10:25808692-25856141	2.84197	6.87957	1.27543	8.26531	5e-05	0.000238134	Ups	postna	_	cellular_component:proteinaceous extracellular matrix(GO:0005578);cellular_component:extracellular space(GO:0005615);biological_process:cell adhesion(GO:0007155);cellular_component:membrane(GO:0016020);cellular_component:integral component of membrane(GO:0016021);biological_process:extracellular matrix organization(GO:0030198);molecular_function:cell adhesion molecule binding(GO:0050839)
ENSDART00000017551	ENSDARG00000039647	11:970511-997895	6.55716	15.9175	1.27947	15.0205	5e-05	0.000238134	Ups	slc6a1b	_	molecular_function:neurotransmitter:sodium symporter activity(GO:0005328);molecular_function:gamma-aminobutyric acid:sodium symporter activity(GO:0005332);molecular_function:gamma-aminobutyric acid:sodium symporter activity(GO:0005332);cellular_component:integral component of plasma membrane(GO:0005887);cellular_component:integral component of plasma membrane(GO:0005887);biological_process:transp…
ENSDART00000017599	ENSDARG00000020544	11:24076314-24093702	0.777722	2.38812	1.61855	4.4774	5e-05	0.000238134	Ups	rem1	K07847	molecular_function:nucleotide binding(GO:0000166);molecular_function:calcium channel regulator activity(GO:0005246);molecular_function:GTP binding(GO:0005525);biological_process:signal transduction(GO:0007165);biological_process:small GTPase mediated signal transduction(GO:0007264);cellular_component:membrane(GO:0016020)
ENSDART00000017679	ENSDARG00000056797	1:13592827-13620325	1.1055	2.46379	1.15618	3.6322	5e-05	0.000238134	Ups	ppp2r2ca	K04354	cellular_component:protein phosphatase type 2A complex(GO:0000159);cellular_component:protein phosphatase type 2A complex(GO:0000159);biological_process:mitotic cell cycle(GO:0000278);molecular_function:protein serine/threonine phosphatase activity(GO:0004722);cellular_component:cytosol(GO:0005829);biological_process:developmental process(GO:0032502);biological_process:peptidyl-serine dephosphory…
ENSDART00000017750	ENSDARG00000011519	3:22092691-22098054	4.49336	1.5611	-1.52523	-4.67028	5e-05	0.000238134	Down	myl4	K12750	molecular_function:calcium ion binding(GO:0005509);cellular_component:cellular_component(GO:0005575)
ENSDART00000018047	ENSDARG00000010602	5:10907136-10913773	0.140814	1.53649	3.44778	2.7699	0.0183	0.0494737	Ups	zgc:112294	K19384	molecular_function:molecular_function(GO:0003674);cellular_component:plasma membrane(GO:0005886);cellular_component:cilium(GO:0005929);biological_process:smoothened signaling pathway(GO:0007224);cellular_component:membrane(GO:0016020);cellular_component:integral component of membrane(GO:0016021);biological_process:cell projection organization(GO:0030030);cellular_component:TCTN-B9D complex(GO:003…
ENSDART00000018054	ENSDARG00000006868	8:54107706-54110479	0.290246	0.939825	1.69511	2.89178	0.00335	0.0111323	Ups	trh	K05253	biological_process:histamine metabolic process(GO:0001692);molecular_function:hormone activity(GO:0005179);molecular_function:neuropeptide hormone activity(GO:0005184);cellular_component:extracellular region(GO:0005576);cellular_component:nucleus(GO:0005634);cellular_component:plasma membrane(GO:0005886);biological_process:signal transduction(GO:0007165);molecular_function:thyrotropin-releasing h…
ENSDART00000018205	ENSDARG00000079802	3:54633179-54639104	1.04317	2.31483	1.14993	3.12268	0.00015	0.000666878	Ups	aanat2	K00669	molecular_function:aralkylamine N-acetyltransferase activity(GO:0004059);biological_process:circadian rhythm(GO:0007623);biological_process:circadian rhythm(GO:0007623);molecular_function:N-acetyltransferase activity(GO:0008080);biological_process:response to light stimulus(GO:0009416);biological_process:response to light stimulus(GO:0009416);biological_process:photoperiodism(GO:0009648);molecula…
ENSDART00000018401	ENSDARG00000011515	8:40236763-40248638	1.68084	0.347162	-2.27551	-5.69329	5e-05	0.000238134	Down	orai1a	_	biological_process:store-operated calcium entry(GO:0002115);molecular_function:store-operated calcium channel activity(GO:0015279);cellular_component:membrane(GO:0016020);cellular_component:membrane(GO:0016020);cellular_component:integral component of membrane(GO:0016021)
ENSDART00000018764	ENSDARG00000008133	18:17494490-17496353	1.80979	4.46142	1.30168	5.51678	5e-05	0.000238134	Ups	foxl1	K09405	molecular_function:sequence-specific DNA binding RNA polymerase II transcription factor activity(GO:0000981);molecular_function:DNA binding(GO:0003677);molecular_function:sequence-specific DNA binding transcription factor activity(GO:0003700);molecular_function:sequence-specific DNA binding transcription factor activity(GO:0003700);cellular_component:nucleus(GO:0005634);cellular_component:nucleus…
ENSDART00000019035	ENSDARG00000016363	7:26158747-26165287	4.54265	2.06858	-1.13489	-4.12832	5e-05	0.000238134	Down	her8a	K09087	molecular_function:DNA binding(GO:0003677);cellular_component:nucleus(GO:0005634);biological_process:transcription, DNA-templated(GO:0006351);biological_process:regulation of transcription, DNA-templated(GO:0006355);biological_process:gliogenesis(GO:0042063);molecular_function:protein dimerization activity(GO:0046983);biological_process:negative regulation of neurogenesis(GO:0050768)
ENSDART00000019140	ENSDARG00000001910	7:29241522-29354595	2.71672	6.91737	1.34836	6.23868	5e-05	0.000238134	Ups	rorab	_	molecular_function:DNA binding(GO:0003677);molecular_function:sequence-specific DNA binding transcription factor activity(GO:0003700);molecular_function:steroid hormone receptor activity(GO:0003707);molecular_function:ligand-activated sequence-specific DNA binding RNA polymerase II transcription factor activity(GO:0004879);cellular_component:nucleus(GO:0005634);biological_process:transcription, D…
ENSDART00000019165	ENSDARG00000021239	4:17854737-18212788	1.54154	0.262089	-2.55624	-2.51535	0.0015	0.0054753	Down	apaf1	K02084	molecular_function:nucleotide binding(GO:0000166);molecular_function:ATP binding(GO:0005524);cellular_component:cytoplasm(GO:0005737);biological_process:proteolysis(GO:0006508);biological_process:apoptotic process(GO:0006915);molecular_function:peptidase activity(GO:0008233);biological_process:activation of cysteine-type endopeptidase activity involved in apoptotic process by cytochrome c(GO:0008…
ENSDART00000019353	ENSDARG00000032496	16:24731567-24741233	7.57471	3.34547	-1.17898	-9.84986	5e-05	0.000238134	Down	pon1	_	molecular_function:arylesterase activity(GO:0004064);molecular_function:arylesterase activity(GO:0004064);cellular_component:cellular_component(GO:0005575);biological_process:response to toxic substance(GO:0009636)
ENSDART00000019413	ENSDARG00000070723	25:16675991-16686135	63.9826	5.89069	-3.44117	-4.36575	5e-05	0.000238134	Down	ndufa9a	_	biological_process:response to hypoxia(GO:0001666);molecular_function:catalytic activity(GO:0003824);molecular_function:NADH dehydrogenase activity(GO:0003954);molecular_function:coenzyme binding(GO:0050662);biological_process:ubiquinone-6 biosynthetic process(GO:1901006)
ENSDART00000019446	ENSDARG00000101628	7:49442973-49444419	32.4221	14.3718	-1.17373	-10.9594	5e-05	0.000238134	Down	ascl1b	K09067	molecular_function:RNA polymerase II regulatory region sequence-specific DNA binding(GO:0000977);molecular_function:transcription factor binding transcription factor activity(GO:0000989);molecular_function:DNA binding(GO:0003677);molecular_function:DNA binding(GO:0003677);molecular_function:sequence-specific DNA binding transcription factor activity(GO:0003700);molecular_function:sequence-specifi…
ENSDART00000019458	ENSDARG00000079698	4:11480855-11484341	1.10023	2.43777	1.14776	2.79439	0.00165	0.00596975	Ups	asb13a.1	_	molecular_function:molecular_function(GO:0003674);biological_process:protein ubiquitination(GO:0016567);biological_process:intracellular signal transduction(GO:0035556)
ENSDART00000019508	ENSDARG00000011961	4:2581517-2595823	5.03526	1.65284	-1.60712	-4.90011	5e-05	0.000238134	Down	csrp2	K09377	cellular_component:cellular_component(GO:0005575);molecular_function:zinc ion binding(GO:0008270);molecular_function:metal ion binding(GO:0046872)
ENSDART00000019706	ENSDARG00000013224	6:48156194-48200517	10.4995	22.1672	1.07811	15.5011	5e-05	0.000238134	Ups	phc2b	K11457	cellular_component:nucleus(GO:0005634);molecular_function:zinc ion binding(GO:0008270)
ENSDART00000020136	ENSDARG00000013946	2:23723749-23735157	43.6152	18.5328	-1.23475	-20.2428	5e-05	0.000238134	Down	ivns1abpb	K15046	cellular_component:nucleus(GO:0005634);cellular_component:cytoplasm(GO:0005737);cellular_component:cytoskeleton(GO:0005856);cellular_component:actin cytoskeleton(GO:0015629)
ENSDART00000020167	ENSDARG00000013926	17:20619233-20646780	1.45199	0.142976	-3.34418	-4.08027	0.0022	0.00769893	Down	slc16a9a	_	molecular_function:monocarboxylic acid transmembrane transporter activity(GO:0008028);cellular_component:membrane(GO:0016020);cellular_component:integral component of membrane(GO:0016021);cellular_component:integral component of membrane(GO:0016021);biological_process:transmembrane transport(GO:0055085)
ENSDART00000020256	ENSDARG00000007715	11:11279827-11283261	3.42971	11.7534	1.77692	11.9979	5e-05	0.000238134	Ups	lgsn	_	biological_process:lens morphogenesis in camera-type eye(GO:0002089);molecular_function:catalytic activity(GO:0003824);molecular_function:glutamate-ammonia ligase activity(GO:0004356);cellular_component:actin filament(GO:0005884);biological_process:glutamine biosynthetic process(GO:0006542);biological_process:nitrogen compound metabolic process(GO:0006807);biological_process:cell differentiation(…
ENSDART00000020288	ENSDARG00000055163	7:21620924-21652539	0.841081	0.29649	-1.50426	-2.12483	0.0073	0.0221903	Down	epoa	K05437	molecular_function:erythropoietin receptor binding(GO:0005128);molecular_function:hormone activity(GO:0005179);cellular_component:extracellular region(GO:0005576);biological_process:response to activity(GO:0014823);biological_process:hemopoiesis(GO:0030097);biological_process:hemopoiesis(GO:0030097);biological_process:erythrocyte maturation(GO:0043249);cellular_component:perinuclear region of cyt…
ENSDART00000020472	ENSDARG00000018351	5:2544814-2582079	0.181103	2.60392	3.8458	5.29597	5e-05	0.000238134	Ups	hpda	K00457	molecular_function:4-hydroxyphenylpyruvate dioxygenase activity(GO:0003868);molecular_function:4-hydroxyphenylpyruvate dioxygenase activity(GO:0003868);molecular_function:lactoylglutathione lyase activity(GO:0004462);cellular_component:cellular_component(GO:0005575);biological_process:L-phenylalanine catabolic process(GO:0006559);biological_process:tyrosine catabolic process(GO:0006572);biologica…
ENSDART00000020665	ENSDARG00000016769	10:15382648-15447445	2.80763	1.36003	-1.04571	-3.23586	0.0002	0.000872038	Down	sgtb	_	cellular_component:cellular_component(GO:0005575);biological_process:biological_process(GO:0008150)
ENSDART00000020741	ENSDARG00000011665	3:39425140-39435194	520.954	243.215	-1.09892	-28.2864	5e-05	0.000238134	Down	aldoaa	K01623	biological_process:somitogenesis(GO:0001756);biological_process:thigmotaxis(GO:0001966);molecular_function:catalytic activity(GO:0003824);molecular_function:fructose-bisphosphate aldolase activity(GO:0004332);biological_process:glycolytic process(GO:0006096);biological_process:axonogenesis(GO:0007409);biological_process:brain development(GO:0007420);molecular_function:lyase activity(GO:0016829);b…
ENSDART00000021194	ENSDARG00000053561	4:74998756-75011610	7.86299	16.1049	1.03435	5.81997	5e-05	0.000238134	Ups	ms4a17a.11	_	cellular_component:membrane(GO:0016020);cellular_component:integral component of membrane(GO:0016021)
ENSDART00000021878	ENSDARG00000036272	1:55675354-55693812	1.58755	0.736844	-1.10737	-2.92014	0.0004	0.00165256	Down	gcgrb	K04583	molecular_function:signal transducer activity(GO:0004871);molecular_function:transmembrane signaling receptor activity(GO:0004888);molecular_function:G-protein coupled receptor activity(GO:0004930);biological_process:signal transduction(GO:0007165);biological_process:cell surface receptor signaling pathway(GO:0007166);biological_process:G-protein coupled receptor signaling pathway(GO:0007186);bio…
ENSDART00000021947	ENSDARG00000007366	7:19137335-19168366	2.74736	1.26346	-1.12067	-3.01687	0.0002	0.000872038	Down	AMDHD1	K01468	_
ENSDART00000021950	ENSDARG00000040492	17:49271367-49329338	35.3196	15.8509	-1.15591	-18.0073	5e-05	0.000238134	Down	mthfd1b	K00288	molecular_function:catalytic activity(GO:0003824);molecular_function:formate-tetrahydrofolate ligase activity(GO:0004329);molecular_function:formate-tetrahydrofolate ligase activity(GO:0004329);molecular_function:methenyltetrahydrofolate cyclohydrolase activity(GO:0004477);molecular_function:methylenetetrahydrofolate dehydrogenase (NADP+) activity(GO:0004488);molecular_function:methylenetetrahydr…
ENSDART00000021953	ENSDARG00000008235	4:2618671-2707599	2.59563	5.51016	1.08601	4.57199	5e-05	0.000238134	Ups	cog5	_	biological_process:intra-Golgi vesicle-mediated transport(GO:0006891);biological_process:intra-Golgi vesicle-mediated transport(GO:0006891);cellular_component:Golgi transport complex(GO:0017119);cellular_component:Golgi transport complex(GO:0017119)
ENSDART00000022074	ENSDARG00000019260	9:49008552-49038903	4.51313	1.01702	-2.14977	-6.01306	5e-05	0.000238134	Down	dhrs9	_	biological_process:heart looping(GO:0001947);molecular_function:retinol dehydrogenase activity(GO:0004745);biological_process:neural crest cell development(GO:0014032);molecular_function:oxidoreductase activity(GO:0016491);biological_process:exocrine pancreas development(GO:0031017);biological_process:pectoral fin morphogenesis(GO:0035138);biological_process:retinol metabolic process(GO:0042572);…
ENSDART00000022147	ENSDARG00000014915	3:35405612-35411902	3.23372	6.7263	1.05662	3.55184	5e-05	0.000238134	Ups	ndufab1b	K03955	biological_process:lipid metabolic process(GO:0006629);biological_process:fatty acid metabolic process(GO:0006631);biological_process:fatty acid biosynthetic process(GO:0006633)
ENSDART00000022307	ENSDARG00000016706	1:4739584-4845260	110.148	52.23	-1.07649	-22.6109	5e-05	0.000238134	Down	atic	K00602	molecular_function:catalytic activity(GO:0003824);molecular_function:IMP cyclohydrolase activity(GO:0003937);molecular_function:phosphoribosylaminoimidazolecarboxamide formyltransferase activity(GO:0004643);biological_process:purine nucleotide biosynthetic process(GO:0006164)
ENSDART00000022437	ENSDARG00000012987	25:35408674-35434057	84.2065	41.2864	-1.02826	-19.7968	5e-05	0.000238134	Down	gpia	K01810	molecular_function:glucose-6-phosphate isomerase activity(GO:0004347);biological_process:gluconeogenesis(GO:0006094);biological_process:glycolytic process(GO:0006096);molecular_function:isomerase activity(GO:0016853)
ENSDART00000022445	ENSDARG00000005749	22:31096348-31110475	5.69255	2.44796	-1.2175	-8.66808	5e-05	0.000238134	Down	cand2	K17263	cellular_component:nucleus(GO:0005634);biological_process:SCF complex assembly(GO:0010265);biological_process:protein ubiquitination(GO:0016567)
ENSDART00000022526	ENSDARG00000018650	11:6012921-6040504	0.838323	0.381287	-1.13663	-1.82466	0.0142	0.039708	Down	gtpbp3	_	molecular_function:nucleotide binding(GO:0000166);biological_process:tRNA wobble uridine modification(GO:0002098);molecular_function:GTPase activity(GO:0003924);molecular_function:GTPase activity(GO:0003924);molecular_function:GTP binding(GO:0005525);molecular_function:GTP binding(GO:0005525);cellular_component:intracellular(GO:0005622);cellular_component:mitochondrion(GO:0005739);cellular_compon…
ENSDART00000022539	ENSDARG00000019861	4:20455167-20501207	0.177465	0.749522	2.07844	2.61849	0.0021	0.00738585	Ups	fgl2a	_	molecular_function:peptidase activity(GO:0008233)
ENSDART00000022620	ENSDARG00000063538	6:9082512-9220427	1.36808	4.03342	1.55985	4.22295	5e-05	0.000238134	Ups	kalrnb	_	molecular_function:Rho guanyl-nucleotide exchange factor activity(GO:0005089);biological_process:hemopoiesis(GO:0030097);biological_process:regulation of Rho protein signal transduction(GO:0035023)
ENSDART00000022676	ENSDARG00000016375	19:26070139-26093779	7.13916	3.13287	-1.18827	-4.54618	5e-05	0.000238134	Down	asns	K01953	molecular_function:asparagine synthase (glutamine-hydrolyzing) activity(GO:0004066);molecular_function:asparagine synthase (glutamine-hydrolyzing) activity(GO:0004066);cellular_component:cytosol(GO:0005829);biological_process:asparagine biosynthetic process(GO:0006529);biological_process:asparagine biosynthetic process(GO:0006529);biological_process:glutamine metabolic process(GO:0006541);molecul…
ENSDART00000023547	ENSDARG00000002632	12:48795596-48883985	19.072	8.18266	-1.22081	-3.03974	5e-05	0.000238134	Down	anxa11b	K17095	molecular_function:calcium ion binding(GO:0005509);molecular_function:calcium-dependent phospholipid binding(GO:0005544)
ENSDART00000023562	ENSDARG00000014169	6:55164915-55183001	2.32764	0.758173	-1.61827	-2.44392	0.0076	0.0229952	Down	CABZ01041610.1	_	_
ENSDART00000023917	ENSDARG00000005126	4:73574646-73618127	1.79901	0.433131	-2.05432	-3.23655	0.0001	0.000458341	Down	large	K09668	molecular_function:alpha-1,6-mannosyltransferase activity(GO:0000009);molecular_function:alpha-1,2-mannosyltransferase activity(GO:0000026);molecular_function:mannosyltransferase activity(GO:0000030);molecular_function:alpha-1,3-mannosyltransferase activity(GO:0000033);cellular_component:Golgi membrane(GO:0000139);molecular_function:alpha-1,3-galactosyltransferase activity(GO:0001962);molecular_f…
ENSDART00000024084	ENSDARG00000020956	24:12775599-12794503	67.0778	29.021	-1.20874	-28.4165	5e-05	0.000238134	Down	pck2	K01596	molecular_function:phosphoenolpyruvate carboxykinase activity(GO:0004611);molecular_function:phosphoenolpyruvate carboxykinase (GTP) activity(GO:0004613);molecular_function:GTP binding(GO:0005525);biological_process:gluconeogenesis(GO:0006094);molecular_function:purine nucleotide binding(GO:0017076)
ENSDART00000024191	ENSDARG00000018228	7:23020975-23223452	0.232032	0.908905	1.9698	2.2445	0.01645	0.045083	Ups	htr2cl1	K04157	molecular_function:signal transducer activity(GO:0004871);molecular_function:G-protein coupled receptor activity(GO:0004930);molecular_function:serotonin receptor activity(GO:0004993);molecular_function:serotonin receptor activity(GO:0004993);cellular_component:plasma membrane(GO:0005886);cellular_component:integral component of plasma membrane(GO:0005887);cellular_component:integral component of…
ENSDART00000024283	ENSDARG00000010124	23:28096554-28099402	0.467491	1.6597	1.82792	4.26532	5e-05	0.000238134	Ups	sp5l	_	biological_process:mesoderm formation(GO:0001707);molecular_function:nucleic acid binding(GO:0003676);biological_process:regulation of transcription, DNA-templated(GO:0006355);biological_process:mesoderm development(GO:0007498);biological_process:anterior/posterior pattern specification(GO:0009952);biological_process:Wnt signaling pathway(GO:0016055);biological_process:hindbrain development(GO:00…
ENSDART00000024287	ENSDARG00000021241	21:27521685-27533521	0.332984	0.981629	1.55973	2.38648	0.0064	0.0197597	Ups	zgc:165604	_	molecular_function:molecular_function(GO:0003674);biological_process:biological_process(GO:0008150);cellular_component:membrane(GO:0016020);cellular_component:integral component of membrane(GO:0016021)
ENSDART00000024751	ENSDARG00000042094	22:20110416-20130342	5.29029	1.93882	-1.44817	-7.4021	5e-05	0.000238134	Down	eef2a.1	K03234	molecular_function:translation elongation factor activity(GO:0003746);molecular_function:GTPase activity(GO:0003924);molecular_function:GTPase activity(GO:0003924);molecular_function:GTP binding(GO:0005525);cellular_component:intracellular(GO:0005622);biological_process:translation(GO:0006412);biological_process:translation(GO:0006412);biological_process:translational elongation(GO:0006414)
ENSDART00000024847	ENSDARG00000013935	19:2225701-2239151	3.99083	1.92777	-1.04975	-3.7004	5e-05	0.000238134	Down	TMEM196 (1 of many)	_	_
ENSDART00000024922	ENSDARG00000021389	20:21491518-21575956	5.82052	2.83397	-1.03832	-2.27184	0.00025	0.00107263	Down	jag2b	K06052	biological_process:liver development(GO:0001889);biological_process:liver development(GO:0001889);molecular_function:Notch binding(GO:0005112);molecular_function:calcium ion binding(GO:0005509);cellular_component:integral component of plasma membrane(GO:0005887);biological_process:cell communication(GO:0007154);biological_process:Notch signaling pathway(GO:0007219);biological_process:Notch signal…
ENSDART00000025019	ENSDARG00000013266	17:36569111-36581431	2.02314	0.797587	-1.34288	-4.66351	5e-05	0.000238134	Down	colec11	K10066	biological_process:neural crest cell migration(GO:0001755);biological_process:neural crest cell migration(GO:0001755);molecular_function:mannose binding(GO:0005537);cellular_component:extracellular region(GO:0005576);cellular_component:collagen trimer(GO:0005581);biological_process:multicellular organismal development(GO:0007275);molecular_function:carbohydrate binding(GO:0030246);biological_proc…
ENSDART00000025031	ENSDARG00000005559	6:4379876-4382908	3.67056	7.54029	1.03862	7.45942	5e-05	0.000238134	Ups	pou4f1	K09366	molecular_function:DNA binding(GO:0003677);molecular_function:sequence-specific DNA binding transcription factor activity(GO:0003700);cellular_component:nucleus(GO:0005634);biological_process:transcription, DNA-templated(GO:0006351);biological_process:regulation of transcription, DNA-templated(GO:0006355);molecular_function:sequence-specific DNA binding(GO:0043565)
ENSDART00000025198	ENSDARG00000012051	22:11627456-11632042	1.34091	2.92839	1.12689	2.85303	0.00105	0.00398664	Ups	mettl21a	_	molecular_function:rRNA (adenine-N6,N6-)-dimethyltransferase activity(GO:0000179);molecular_function:protein C-terminal carboxyl O-methyltransferase activity(GO:0003880);molecular_function:tRNA (guanine-N2-)-methyltransferase activity(GO:0004809);cellular_component:cytoplasm(GO:0005737);biological_process:protein methylation(GO:0006479);molecular_function:methyltransferase activity(GO:0008168);mo…
ENSDART00000025308	ENSDARG00000013842	7:61938351-62002626	0.684991	1.5364	1.16539	3.01308	0.00035	0.00146175	Ups	tbc1d19	_	_
ENSDART00000025428	ENSDARG00000017354	6:45872712-45903864	18.9673	9.01162	-1.07365	-13.7174	5e-05	0.000238134	Down	epha2a	K05103	molecular_function:nucleotide binding(GO:0000166);molecular_function:protein kinase activity(GO:0004672);molecular_function:protein tyrosine kinase activity(GO:0004713);molecular_function:ephrin receptor activity(GO:0005003);molecular_function:ATP binding(GO:0005524);cellular_component:integral component of plasma membrane(GO:0005887);biological_process:protein phosphorylation(GO:0006468);biologi…
ENSDART00000025494	ENSDARG00000014866	25:36502299-36513143	5.49001	1.09498	-2.3259	-5.18752	5e-05	0.000238134	Down	hprt1l	_	molecular_function:magnesium ion binding(GO:0000287);molecular_function:hypoxanthine phosphoribosyltransferase activity(GO:0004422);molecular_function:hypoxanthine phosphoribosyltransferase activity(GO:0004422);cellular_component:cytoplasm(GO:0005737);cellular_component:cytosol(GO:0005829);biological_process:purine ribonucleoside salvage(GO:0006166);biological_process:adenine salvage(GO:0006168);…
ENSDART00000025841	ENSDARG00000011157	2:37521786-37555447	10.348	4.50626	-1.19935	-12.0228	5e-05	0.000238134	Down	arhgef18a	_	molecular_function:Rho guanyl-nucleotide exchange factor activity(GO:0005089);biological_process:regulation of Rho protein signal transduction(GO:0035023)
ENSDART00000026303	ENSDARG00000019274	12:1370085-1371691	39.6637	11.7058	-1.76059	-15.9415	5e-05	0.000238134	Down	rasd1	K07843	molecular_function:nucleotide binding(GO:0000166);molecular_function:GTP binding(GO:0005525);biological_process:signal transduction(GO:0007165);biological_process:small GTPase mediated signal transduction(GO:0007264);cellular_component:membrane(GO:0016020)
ENSDART00000026430	ENSDARG00000002204	21:20347200-20348242	6.27628	2.85272	-1.13757	-4.16847	5e-05	0.000238134	Down	hspb11	_	_
ENSDART00000026992	ENSDARG00000004588	19:29093870-29239197	56.6453	124.506	1.13619	29.977	5e-05	0.000238134	Ups	sox4a	K09268	biological_process:negative regulation of smoothened signaling pathway(GO:0045879);biological_process:closure of optic fissure(GO:0061386)
ENSDART00000027000	ENSDARG00000002193	8:53668766-53670321	0.0485413	3.59548	6.21083	3.75749	0.0185	0.0499205	Ups	rho	K04250	cellular_component:photoreceptor outer segment(GO:0001750);molecular_function:signal transducer activity(GO:0004871);molecular_function:G-protein coupled receptor activity(GO:0004930);cellular_component:integral component of plasma membrane(GO:0005887);biological_process:signal transduction(GO:0007165);biological_process:G-protein coupled receptor signaling pathway(GO:0007186);biological_process:…
ENSDART00000027214	ENSDARG00000010572	8:2547524-2557783	17.5756	7.79431	-1.17308	-11.7437	5e-05	0.000238134	Down	slc25a25a	K14684	molecular_function:calcium ion binding(GO:0005509);cellular_component:mitochondrion(GO:0005739);cellular_component:mitochondrial inner membrane(GO:0005743);biological_process:transport(GO:0006810);cellular_component:membrane(GO:0016020);cellular_component:integral component of membrane(GO:0016021);molecular_function:metal ion binding(GO:0046872);biological_process:transmembrane transport(GO:00550…
ENSDART00000027304	ENSDARG00000006409	4:5325417-5655206	10.9181	1.88183	-2.53652	-9.71721	5e-05	0.000238134	Down	mapk12b	K04441	molecular_function:nucleotide binding(GO:0000166);molecular_function:protein kinase activity(GO:0004672);molecular_function:protein serine/threonine kinase activity(GO:0004674);molecular_function:MAP kinase activity(GO:0004707);molecular_function:ATP binding(GO:0005524);biological_process:protein phosphorylation(GO:0006468);molecular_function:kinase activity(GO:0016301);biological_process:phospho…
ENSDART00000027386	ENSDARG00000014138	11:1485982-1494358	0.621753	1.70639	1.45653	3.13663	0.00025	0.00107263	Ups	acot8	K11992	cellular_component:cellular_component(GO:0005575);biological_process:acyl-CoA metabolic process(GO:0006637);molecular_function:acyl-CoA hydrolase activity(GO:0047617)
ENSDART00000027545	ENSDARG00000019008	16:27253028-27507723	7.30362	16.5056	1.17627	4.44898	5e-05	0.000238134	Ups	erp44	K17264	molecular_function:protein disulfide isomerase activity(GO:0003756);cellular_component:endoplasmic reticulum(GO:0005783);biological_process:protein folding(GO:0006457);biological_process:heart development(GO:0007507);biological_process:regulation of cardiac muscle contraction by calcium ion signaling(GO:0010882);biological_process:response to endoplasmic reticulum stress(GO:0034976);biological_pr…
ENSDART00000027598	ENSDARG00000005162	19:11069619-11113275	331.863	165.468	-1.00404	-21.8414	5e-05	0.000238134	Down	tpm3	_	_
ENSDART00000027603	ENSDARG00000043257	20:20917073-20922116	160.438	338.71	1.07803	26.4929	5e-05	0.000238134	Ups	ckbb	K00933	molecular_function:nucleotide binding(GO:0000166);molecular_function:catalytic activity(GO:0003824);molecular_function:creatine kinase activity(GO:0004111);molecular_function:ATP binding(GO:0005524);molecular_function:kinase activity(GO:0016301);biological_process:phosphorylation(GO:0016310);molecular_function:transferase activity(GO:0016740);molecular_function:transferase activity, transferring …
ENSDART00000027661	ENSDARG00000030110	25:30843776-30846017	15.1678	5.08064	-1.57793	-11.2108	5e-05	0.000238134	Down	myod1	K09064	molecular_function:RNA polymerase II core promoter proximal region sequence-specific DNA binding(GO:0000978);molecular_function:core promoter binding(GO:0001047);molecular_function:RNA polymerase II transcription regulatory region sequence-specific DNA binding transcription factor activity involved in positive regulation of transcription(GO:0001228);biological_process:extraocular skeletal muscle …
ENSDART00000027973	ENSDARG00000006427	1:25157401-25160746	208.762	56.2561	-1.89178	-31.5396	5e-05	0.000238134	Down	fabp2	K08751	molecular_function:transporter activity(GO:0005215);molecular_function:fatty acid binding(GO:0005504);biological_process:transport(GO:0006810);molecular_function:lipid binding(GO:0008289)
ENSDART00000027982	ENSDARG00000005762	16:14794795-15160722	6.59154	3.24233	-1.02358	-6.26507	5e-05	0.000238134	Down	col14a1a	K08133	cellular_component:proteinaceous extracellular matrix(GO:0005578);cellular_component:collagen trimer(GO:0005581);cellular_component:basement membrane(GO:0005604);cellular_component:extracellular space(GO:0005615);biological_process:basement membrane assembly(GO:0070831)
ENSDART00000028062	ENSDARG00000005629	20:582189-600163	10.3063	4.88188	-1.07802	-2.08486	0.00445	0.0143352	Down	smyd2b	K11426	biological_process:negative regulation of transcription from RNA polymerase II promoter(GO:0000122);molecular_function:RNA polymerase II core binding(GO:0000993);cellular_component:nucleus(GO:0005634);cellular_component:nucleus(GO:0005634);cellular_component:cytoplasm(GO:0005737);cellular_component:cytosol(GO:0005829);biological_process:transcription, DNA-templated(GO:0006351);biological_process:…
ENSDART00000028093	ENSDARG00000016081	2:5596659-5605556	3.72396	8.78493	1.23819	4.84835	5e-05	0.000238134	Ups	cldn15la	K06087	molecular_function:structural molecule activity(GO:0005198);cellular_component:plasma membrane(GO:0005886);cellular_component:bicellular tight junction(GO:0005923);cellular_component:membrane(GO:0016020);cellular_component:integral component of membrane(GO:0016021);cellular_component:cell junction(GO:0030054)
ENSDART00000028301	ENSDARG00000023176	11:33821729-33834881	0.73328	0.177305	-2.04814	-2.80604	0.0101	0.0295243	Down	tdo2b	K00453	molecular_function:tryptophan 2,3-dioxygenase activity(GO:0004833);molecular_function:tryptophan 2,3-dioxygenase activity(GO:0004833);cellular_component:cellular_component(GO:0005575);biological_process:tryptophan catabolic process(GO:0006569);molecular_function:oxidoreductase activity(GO:0016491);biological_process:tryptophan catabolic process to kynurenine(GO:0019441);biological_process:tryptop…
ENSDART00000028787	ENSDARG00000023537	22:12954435-13018215	1.14727	2.36929	1.04625	5.20924	5e-05	0.000238134	Ups	ahr1b	K09093	molecular_function:sequence-specific DNA binding RNA polymerase II transcription factor activity(GO:0000981);molecular_function:DNA binding(GO:0003677);molecular_function:aryl hydrocarbon receptor activity(GO:0004874);cellular_component:nucleus(GO:0005634);biological_process:transcription, DNA-templated(GO:0006351);biological_process:regulation of transcription, DNA-templated(GO:0006355);biologic…
ENSDART00000028938	ENSDARG00000097017	18:10802448-10953520	3.53469	1.23322	-1.51915	-2.36124	0.0043	0.0139112	Down	mical3a	_	_
ENSDART00000028944	ENSDARG00000039500	18:49416693-49434039	0.60697	1.35438	1.15794	2.86161	0.00075	0.00293046	Ups	LRFN3	_	_
ENSDART00000029051	ENSDARG00000039832	13:699293-726410	6.51203	0.443843	-3.87499	-4.9659	5e-05	0.000238134	Down	gsta.2	K00799	molecular_function:glutathione transferase activity(GO:0004364);molecular_function:glutathione transferase activity(GO:0004364);cellular_component:cellular_component(GO:0005575);biological_process:metabolic process(GO:0008152);molecular_function:transferase activity(GO:0016740)
ENSDART00000029133	ENSDARG00000023299	12:10405941-10409335	86.7787	37.7216	-1.20195	-13.0643	5e-05	0.000238134	Down	snu13b	K12845	biological_process:mRNA splicing, via spliceosome(GO:0000398);biological_process:maturation of LSU-rRNA(GO:0000470);molecular_function:RNA binding(GO:0003723);molecular_function:RNA binding(GO:0003723);cellular_component:nucleolus(GO:0005730);biological_process:translation(GO:0006412);cellular_component:cytosolic large ribosomal subunit(GO:0022625);biological_process:maturation of SSU-rRNA(GO:003…
ENSDART00000029380	ENSDARG00000022832	17:20211964-20216473	14.9571	5.29373	-1.49847	-8.6013	5e-05	0.000238134	Down	bnip4	K15464	molecular_function:molecular_function(GO:0003674);cellular_component:nuclear envelope(GO:0005635);cellular_component:mitochondrial envelope(GO:0005740);cellular_component:mitochondrial outer membrane(GO:0005741);cellular_component:endoplasmic reticulum(GO:0005783);cellular_component:membrane(GO:0016020);cellular_component:integral component of membrane(GO:0016021);biological_process:positive regu…
ENSDART00000029588	ENSDARG00000022372	22:36898334-36959032	55.6858	22.1374	-1.33083	-10.0997	5e-05	0.000238134	Down	kng1	K03898	molecular_function:cysteine-type endopeptidase inhibitor activity(GO:0004869);molecular_function:cysteine-type endopeptidase inhibitor activity(GO:0004869);biological_process:positive regulation of cytosolic calcium ion concentration(GO:0007204);biological_process:negative regulation of blood coagulation(GO:0030195);cellular_component:blood microparticle(GO:0072562);
ENSDART00000029695	ENSDARG00000057575	11:24052513-24060085	12.1173	25.5095	1.07396	11.083	5e-05	0.000238134	Ups	pnp4a	_	molecular_function:catalytic activity(GO:0003824);molecular_function:purine-nucleoside phosphorylase activity(GO:0004731);molecular_function:purine-nucleoside phosphorylase activity(GO:0004731);cellular_component:cytoplasm(GO:0005737);biological_process:nucleobase-containing compound metabolic process(GO:0006139);biological_process:nucleoside metabolic process(GO:0009116);molecular_function:trans…
ENSDART00000029801	ENSDARG00000030448	2:37498211-37520552	9.0844	3.7668	-1.27005	-5.45617	5e-05	0.000238134	Down	sppl2	K09597	molecular_function:aspartic-type endopeptidase activity(GO:0004190);cellular_component:lysosomal membrane(GO:0005765);biological_process:signal peptide processing(GO:0006465);cellular_component:membrane(GO:0016020);cellular_component:integral component of membrane(GO:0016021);cellular_component:Golgi-associated vesicle membrane(GO:0030660);biological_process:membrane protein intracellular domain …
ENSDART00000029974	ENSDARG00000022560	23:24345812-24365346	1.69871	0.520359	-1.70686	-4.52918	5e-05	0.000238134	Down	clcnk	K05017	molecular_function:ion channel activity(GO:0005216);molecular_function:voltage-gated chloride channel activity(GO:0005247);molecular_function:voltage-gated chloride channel activity(GO:0005247);cellular_component:integral component of plasma membrane(GO:0005887);biological_process:transport(GO:0006810);biological_process:ion transport(GO:0006811);biological_process:chloride transport(GO:0006821);…
ENSDART00000030205	ENSDARG00000028067	10:18953717-18978511	33.5241	15.6542	-1.09864	-15.5516	5e-05	0.000238134	Down	bnip3lb	K15465	biological_process:heart looping(GO:0001947);cellular_component:nuclear envelope(GO:0005635);cellular_component:mitochondrial envelope(GO:0005740);cellular_component:mitochondrial outer membrane(GO:0005741);cellular_component:endoplasmic reticulum(GO:0005783);cellular_component:membrane(GO:0016020);cellular_component:integral component of membrane(GO:0016021);biological_process:positive regulatio…
ENSDART00000031546	ENSDARG00000055559	1:21793825-21821324	0.387927	1.18974	1.61679	3.3145	0.0005	0.00202494	Ups	chrna6	K04808	molecular_function:acetylcholine-activated cation-selective channel activity(GO:0004889);molecular_function:acetylcholine-activated cation-selective channel activity(GO:0004889);molecular_function:ion channel activity(GO:0005216);molecular_function:extracellular ligand-gated ion channel activity(GO:0005230);cellular_component:plasma membrane(GO:0005886);cellular_component:acetylcholine-gated chan…
ENSDART00000031650	ENSDARG00000055723	8:4741890-4744644	8.15672	3.60006	-1.17997	-7.86445	5e-05	0.000238134	Down	hsp70l	K03283	molecular_function:nucleotide binding(GO:0000166);biological_process:blood vessel development(GO:0001568);molecular_function:ATP binding(GO:0005524);cellular_component:nucleus(GO:0005634);cellular_component:cytoplasm(GO:0005737);biological_process:response to heat(GO:0009408);biological_process:response to metal ion(GO:0010038);biological_process:response to cadmium ion(GO:0046686);biological_pro…
ENSDART00000031665	ENSDARG00000026726	5:24978027-24983172	320.086	151.805	-1.07624	-13.9667	5e-05	0.000238134	Down	anxa1a	K17091	molecular_function:phospholipase inhibitor activity(GO:0004859);molecular_function:calcium ion binding(GO:0005509);molecular_function:calcium-dependent phospholipid binding(GO:0005544);biological_process:fin regeneration(GO:0031101)
ENSDART00000032982	ENSDARG00000003697	6:49064635-49080049	1.0589	0.4053	-1.3855	-3.04719	0.0006	0.00238787	Down	slc5a8l	K14388	molecular_function:transporter activity(GO:0005215);cellular_component:integral component of plasma membrane(GO:0005887);biological_process:transport(GO:0006810);biological_process:ion transport(GO:0006811);biological_process:sodium ion transport(GO:0006814);molecular_function:symporter activity(GO:0015293);molecular_function:symporter activity(GO:0015293);molecular_function:secondary active mono…
ENSDART00000033386	ENSDARG00000022139	8:28686681-28694086	0.112351	1.28753	3.51853	3.44248	0.01805	0.0488806	Ups	ocstamp	_	molecular_function:molecular_function(GO:0003674);biological_process:biological_process(GO:0008150);cellular_component:membrane(GO:0016020);cellular_component:integral component of membrane(GO:0016021)
ENSDART00000033588	ENSDARG00000024870	20:30128698-30181234	51.3247	18.9093	-1.44056	-2.4358	5e-05	0.000238134	Down	BX248324.1	_	_
ENSDART00000033702	ENSDARG00000025679	11:25382275-25393826	7.49615	2.70491	-1.47057	-8.2958	5e-05	0.000238134	Down	comtb	K00545	molecular_function:magnesium ion binding(GO:0000287);cellular_component:cellular_component(GO:0005575);biological_process:catecholamine metabolic process(GO:0006584);molecular_function:methyltransferase activity(GO:0008168);molecular_function:O-methyltransferase activity(GO:0008171);molecular_function:catechol O-methyltransferase activity(GO:0016206);molecular_function:transferase activity(GO:001…
ENSDART00000033761	ENSDARG00000036415	1:51827329-51846081	1.62133	0.717352	-1.17643	-3.59478	5e-05	0.000238134	Down	glb1	K12309	molecular_function:hydrolase activity, hydrolyzing O-glycosyl compounds(GO:0004553);molecular_function:beta-galactosidase activity(GO:0004565);molecular_function:beta-galactosidase activity(GO:0004565);cellular_component:vacuole(GO:0005773);biological_process:carbohydrate metabolic process(GO:0005975);biological_process:metabolic process(GO:0008152);molecular_function:hydrolase activity(GO:001678…
ENSDART00000033844	ENSDARG00000021720	6:40186698-40314609	11.1491	5.09775	-1.129	-7.51866	5e-05	0.000238134	Down	col7a1	K16628	molecular_function:serine-type endopeptidase inhibitor activity(GO:0004867);cellular_component:extracellular space(GO:0005615)
ENSDART00000034549	ENSDARG00000006588	1:44472117-44476098	31.6334	15.5036	-1.02885	-12.3504	5e-05	0.000238134	Down	zgc:111983	_	molecular_function:molecular_function(GO:0003674);biological_process:biological_process(GO:0008150);cellular_component:membrane(GO:0016020);cellular_component:integral component of membrane(GO:0016021)
ENSDART00000034762	ENSDARG00000025615	3:24059255-24066722	2.4212	1.12001	-1.11221	-2.23884	0.0052	0.0164289	Down	prr15la	_	molecular_function:molecular_function(GO:0003674);cellular_component:cellular_component(GO:0005575);biological_process:biological_process(GO:0008150)
ENSDART00000034790	ENSDARG00000023181	2:38012851-38017946	3.44453	7.59698	1.14112	3.70325	5e-05	0.000238134	Ups	pcp4l1	_	cellular_component:ribonucleoprotein complex(GO:0030529)
ENSDART00000034851	ENSDARG00000025670	22:18859893-18868411	0.647581	2.54846	1.97649	3.50099	5e-05	0.000238134	Ups	fstl3	_	_
ENSDART00000034914	ENSDARG00000022817	12:17583343-17585643	81.4061	24.6795	-1.72182	-13.8854	5e-05	0.000238134	Down	pvalb3	_	molecular_function:calcium ion binding(GO:0005509);cellular_component:cellular_component(GO:0005575);molecular_function:metal ion binding(GO:0046872)
ENSDART00000035096	ENSDARG00000019949	15:29450291-29454673	12.6534	4.17156	-1.60087	-2.30029	0.0009	0.00346102	Down	serpinh1b	K09501	molecular_function:serine-type endopeptidase inhibitor activity(GO:0004867);molecular_function:serine-type endopeptidase inhibitor activity(GO:0004867);molecular_function:collagen binding(GO:0005518);molecular_function:collagen binding(GO:0005518);cellular_component:extracellular space(GO:0005615);cellular_component:extracellular space(GO:0005615);cellular_component:endoplasmic reticulum(GO:00057…
ENSDART00000035235	ENSDARG00000002369	5:41463990-41496178	52.6217	109.358	1.05533	9.14089	5e-05	0.000238134	Ups	UBC (1 of many)	_	_
ENSDART00000035685	ENSDARG00000054202	2:37897354-37900799	8.73068	3.22028	-1.43891	-6.03386	5e-05	0.000238134	Down	hbl4	K03991	cellular_component:collagen trimer(GO:0005581);molecular_function:carbohydrate binding(GO:0030246)
ENSDART00000036075	ENSDARG00000023963	22:15552292-15576521	9.93767	3.85974	-1.36441	-4.32674	5e-05	0.000238134	Down	tpm4a	_	biological_process:cardiac myofibril assembly(GO:0055003);biological_process:heart contraction(GO:0060047);biological_process:cardiac muscle contraction(GO:0060048)
ENSDART00000036318	ENSDARG00000026904	2:37892313-37895847	0.725312	1.6809	1.21256	1.94384	0.01535	0.0424611	Ups	cbln13	_	_
ENSDART00000036631	ENSDARG00000023062	23:45721159-45727562	10.075	3.47525	-1.53559	-11.0727	5e-05	0.000238134	Down	cyr61	K06829	biological_process:regulation of cell growth(GO:0001558);molecular_function:insulin-like growth factor binding(GO:0005520);cellular_component:extracellular region(GO:0005576)
ENSDART00000036649	ENSDARG00000017960	12:33874081-33934381	11.2786	29.889	1.40603	12.5952	5e-05	0.000238134	Ups	sfxn2	_	cellular_component:mitochondrion(GO:0005739);biological_process:ion transport(GO:0006811);molecular_function:ion transmembrane transporter activity(GO:0015075);cellular_component:membrane(GO:0016020);cellular_component:integral component of membrane(GO:0016021);cellular_component:mitochondrial membrane(GO:0031966);biological_process:transmembrane transport(GO:0055085)
ENSDART00000036779	ENSDARG00000006747	4:12112304-12240311	1.44235	2.99549	1.05437	9.60582	5e-05	0.000238134	Ups	tmem178b	_	biological_process:biological_process(GO:0008150);cellular_component:membrane(GO:0016020);cellular_component:integral component of membrane(GO:0016021)
ENSDART00000036856	ENSDARG00000025046	4:76170095-76172043	1.36989	0.351428	-1.96276	-3.97076	5e-05	0.000238134	Down	AL935186.1	_	_
ENSDART00000037541	ENSDARG00000027465	17:7638380-7661813	3.59377	7.46041	1.05376	4.7153	5e-05	0.000238134	Ups	rmnd1	_	molecular_function:molecular_function(GO:0003674);cellular_component:cellular_component(GO:0005575);biological_process:biological_process(GO:0008150)
ENSDART00000037879	ENSDARG00000011989	5:36332564-36343822	2.59334	21.5991	3.05809	19.684	5e-05	0.000238134	Ups	crx	_	biological_process:eye development(GO:0001654);molecular_function:DNA binding(GO:0003677);molecular_function:DNA binding(GO:0003677);molecular_function:sequence-specific DNA binding transcription factor activity(GO:0003700);cellular_component:nucleus(GO:0005634);biological_process:regulation of transcription, DNA-templated(GO:0006355);biological_process:multicellular organismal development(GO:000…
ENSDART00000037891	ENSDARG00000027750	5:28559757-28577119	12.3013	5.04366	-1.28626	-4.86247	5e-05	0.000238134	Down	dpp7	K01276	molecular_function:serine-type carboxypeptidase activity(GO:0004185);biological_process:proteolysis(GO:0006508);molecular_function:serine-type peptidase activity(GO:0008236);molecular_function:dipeptidyl-peptidase activity(GO:0008239);cellular_component:vesicle(GO:0031982)
ENSDART00000038696	ENSDARG00000031506	20:46407521-46445344	0.483407	1.05992	1.13265	2.17279	0.0075	0.0227406	Ups	flvcr2b	K08220	cellular_component:membrane(GO:0016020);cellular_component:integral component of membrane(GO:0016021);biological_process:transmembrane transport(GO:0055085)
ENSDART00000038924	ENSDARG00000028275	8:46319470-46501315	53.4346	26.6277	-1.00484	-6.49525	5e-05	0.000238134	Down	sult1st1	_	molecular_function:N-acetylglucosamine 6-O-sulfotransferase activity(GO:0001517);molecular_function:N-acetylgalactosamine 4-O-sulfotransferase activity(GO:0001537);molecular_function:heparan sulfate 2-O-sulfotransferase activity(GO:0004394);cellular_component:cytoplasm(GO:0005737);biological_process:catecholamine metabolic process(GO:0006584);biological_process:xenobiotic metabolic process(GO:000…
ENSDART00000039054	ENSDARG00000032326	16:4825046-4878382	2.03768	4.31718	1.08316	3.94297	5e-05	0.000238134	Ups	mecr	K07512	cellular_component:mitochondrion(GO:0005739);biological_process:lipid metabolic process(GO:0006629);biological_process:fatty acid metabolic process(GO:0006631);biological_process:fatty acid biosynthetic process(GO:0006633);molecular_function:zinc ion binding(GO:0008270);molecular_function:oxidoreductase activity(GO:0016491);molecular_function:trans-2-enoyl-CoA reductase (NADPH) activity(GO:001916…
ENSDART00000039235	ENSDARG00000023188	9:56663225-56705090	2.69521	1.26853	-1.08724	-2.35762	0.0026	0.00892591	Down	lcp1	K17276	molecular_function:actin binding(GO:0003779);molecular_function:calcium ion binding(GO:0005509);cellular_component:cytoplasm(GO:0005737);cellular_component:cytoplasm(GO:0005737);cellular_component:cytoskeleton(GO:0005856);cellular_component:actin filament(GO:0005884);cellular_component:plasma membrane(GO:0005886);cellular_component:membrane(GO:0016020);cellular_component:cell junction(GO:0030054)…
ENSDART00000039549	ENSDARG00000016570	21:11012378-11043314	1.28153	0.519038	-1.30395	-2.0124	0.01125	0.0324243	Down	prlra	K05081	molecular_function:cytokine receptor activity(GO:0004896);molecular_function:prolactin receptor activity(GO:0004925);cellular_component:membrane(GO:0016020);cellular_component:integral component of membrane(GO:0016021);biological_process:prolactin signaling pathway(GO:0038161)
ENSDART00000040126	ENSDARG00000013615	8:33920776-34077023	9.11077	18.7519	1.04139	5.77855	5e-05	0.000238134	Ups	pbx3b	_	molecular_function:DNA binding(GO:0003677);molecular_function:sequence-specific DNA binding transcription factor activity(GO:0003700);cellular_component:nucleus(GO:0005634);biological_process:regulation of transcription, DNA-templated(GO:0006355);molecular_function:sequence-specific DNA binding(GO:0043565)
ENSDART00000040275	ENSDARG00000031438	25:7546590-7552724	0.846974	2.61136	1.62441	4.60464	5e-05	0.000238134	Ups	kcnj11l	K05004	molecular_function:inward rectifier potassium channel activity(GO:0005242);molecular_function:inward rectifier potassium channel activity(GO:0005242);molecular_function:voltage-gated ion channel activity(GO:0005244);molecular_function:potassium channel activity(GO:0005267);cellular_component:intracellular(GO:0005622);cellular_component:plasma membrane(GO:0005886);cellular_component:integral compo…
ENSDART00000040330	ENSDARG00000046143	8:39640932-39669962	19.2425	4.2894	-2.16545	-9.99531	5e-05	0.000238134	Down	prkab1b	K07199	biological_process:signal transduction(GO:0007165);molecular_function:kinase activity(GO:0016301);biological_process:phosphorylation(GO:0016310);molecular_function:transferase activity(GO:0016740);cellular_component:AMP-activated protein kinase complex(GO:0031588);biological_process:regulation of protein kinase activity(GO:0045859)
ENSDART00000041385	ENSDARG00000075538	7:73624537-73625294	2.63801	1.05877	-1.31706	-2.1468	0.01295	0.0366296	Down	zgc:163061	K11275	cellular_component:nucleosome(GO:0000786);molecular_function:DNA binding(GO:0003677);cellular_component:nucleus(GO:0005634);cellular_component:chromosome(GO:0005694);biological_process:nucleosome assembly(GO:0006334)
ENSDART00000041443	ENSDARG00000031049	11:28395713-28835255	0.934922	0.436318	-1.09947	-1.94205	0.01465	0.0407681	Down	igsf21a	_	molecular_function:molecular_function(GO:0003674);biological_process:biological_process(GO:0008150);cellular_component:membrane(GO:0016020);cellular_component:integral component of membrane(GO:0016021)
ENSDART00000041841	ENSDARG00000043662	10:27065159-27087503	2.16882	6.36461	1.55316	8.10528	5e-05	0.000238134	Ups	cnih2	K20368	biological_process:transport(GO:0006810);cellular_component:membrane(GO:0016020);cellular_component:integral component of membrane(GO:0016021)
ENSDART00000042276	ENSDARG00000033447	19:38270783-38340374	5.24098	10.496	1.00193	7.71498	5e-05	0.000238134	Ups	nxph1	K16656	molecular_function:receptor binding(GO:0005102);cellular_component:cellular_component(GO:0005575);biological_process:biological_process(GO:0008150)
ENSDART00000042413	ENSDARG00000030722	2:24093962-24113167	1.64631	0.482824	-1.76967	-3.68947	5e-05	0.000238134	Down	xirp1	_	molecular_function:actin binding(GO:0003779);biological_process:heart development(GO:0007507);biological_process:actin cytoskeleton organization(GO:0030036);cellular_component:cell junction(GO:0030054)
ENSDART00000042572	ENSDARG00000045064	12:29931472-30105444	1.02124	0.17638	-2.53356	-2.44108	0.0148	0.0411297	Down	ablim1b	_	molecular_function:actin binding(GO:0003779);cellular_component:cellular_component(GO:0005575);biological_process:cytoskeleton organization(GO:0007010);molecular_function:zinc ion binding(GO:0008270);molecular_function:metal ion binding(GO:0046872)
ENSDART00000042704	ENSDARG00000030053	20:52723476-53040695	46.6821	15.4817	-1.5923	-5.81886	5e-05	0.000238134	Down	eef1db	K15410	molecular_function:translation elongation factor activity(GO:0003746);cellular_component:eukaryotic translation elongation factor 1 complex(GO:0005853);biological_process:translation(GO:0006412);biological_process:translational elongation(GO:0006414)
ENSDART00000042755	ENSDARG00000033832	8:11042865-11074353	9.82853	53.7392	2.45093	31.1752	5e-05	0.000238134	Ups	ampd1	K01490	molecular_function:AMP deaminase activity(GO:0003876);cellular_component:cellular_component(GO:0005575);biological_process:purine ribonucleoside monophosphate biosynthetic process(GO:0009168);molecular_function:deaminase activity(GO:0019239);biological_process:IMP salvage(GO:0032264)
ENSDART00000042895	ENSDARG00000005112	16:26900739-26929356	27.7752	11.0144	-1.3344	-18.3871	5e-05	0.000238134	Down	cdh17	K06811	molecular_function:calcium ion binding(GO:0005509);cellular_component:plasma membrane(GO:0005886);biological_process:cell adhesion(GO:0007155);biological_process:homophilic cell adhesion via plasma membrane adhesion molecules(GO:0007156);cellular_component:membrane(GO:0016020);cellular_component:integral component of membrane(GO:0016021);biological_process:pronephros development(GO:0048793)
ENSDART00000042990	ENSDARG00000020007	19:41354010-41415860	0.217594	4.79162	4.4608	3.3581	5e-05	0.000238134	Ups	col1a2	K06236	molecular_function:extracellular matrix structural constituent(GO:0005201);cellular_component:extracellular region(GO:0005576);cellular_component:proteinaceous extracellular matrix(GO:0005578);cellular_component:collagen trimer(GO:0005581);biological_process:response to mechanical stimulus(GO:0009612)
ENSDART00000043058	ENSDARG00000037122	14:28860294-29419805	0.558911	1.32822	1.2488	1.7395	0.00785	0.0236322	Ups	TENM2 (1 of many)	_	biological_process:cell morphogenesis(GO:0000902);molecular_function:receptor binding(GO:0005102);cellular_component:integral component of plasma membrane(GO:0005887);cellular_component:integral component of plasma membrane(GO:0005887);biological_process:heterophilic cell-cell adhesion via plasma membrane cell adhesion molecules(GO:0007157);biological_process:signal transduction(GO:0007165);cellu…
ENSDART00000043156	ENSDARG00000033566	13:28470744-28480515	13.0424	4.68858	-1.47599	-12.6799	5e-05	0.000238134	Down	cyp17a1	K00512	molecular_function:monooxygenase activity(GO:0004497);molecular_function:steroid 17-alpha-monooxygenase activity(GO:0004508);molecular_function:steroid 17-alpha-monooxygenase activity(GO:0004508);molecular_function:iron ion binding(GO:0005506);biological_process:steroid biosynthetic process(GO:0006694);biological_process:sex differentiation(GO:0007548);molecular_function:oxidoreductase activity(G…
ENSDART00000043210	ENSDARG00000032578	12:45637902-45714171	3.11951	6.76086	1.11589	6.66202	5e-05	0.000238134	Ups	pax2b	K15608	molecular_function:DNA binding(GO:0003677);cellular_component:nucleus(GO:0005634);biological_process:transcription, DNA-templated(GO:0006351);biological_process:regulation of transcription, DNA-templated(GO:0006355);biological_process:multicellular organismal development(GO:0007275);biological_process:peripheral nervous system development(GO:0007422)
ENSDART00000043251	ENSDARG00000033871	8:30912166-31044640	7.01987	3.18185	-1.14158	-3.62996	5e-05	0.000238134	Down	derl3	K13989	molecular_function:molecular_function(GO:0003674);cellular_component:endoplasmic reticulum(GO:0005783);cellular_component:endoplasmic reticulum membrane(GO:0005789);biological_process:biological_process(GO:0008150);cellular_component:membrane(GO:0016020);cellular_component:integral component of membrane(GO:0016021)
ENSDART00000043298	ENSDARG00000031683	20:46648590-46650720	19.7321	4.9023	-2.00902	-13.92	5e-05	0.000238134	Down	fosab	K04379	molecular_function:RNA polymerase II core promoter proximal region sequence-specific DNA binding(GO:0000978);molecular_function:RNA polymerase II core promoter proximal region sequence-specific DNA binding transcription factor activity(GO:0000982);molecular_function:DNA binding(GO:0003677);molecular_function:double-stranded DNA binding(GO:0003690);molecular_function:sequence-specific DNA binding …
ENSDART00000043452	ENSDARG00000030512	18:21942674-21961685	1.76881	0.570372	-1.6328	-4.50935	5e-05	0.000238134	Down	tsnaxip1	_	cellular_component:cellular_component(GO:0005575);biological_process:biological_process(GO:0008150)
ENSDART00000043556	ENSDARG00000034896	1:22114327-22144085	1.64159	3.91877	1.25531	5.22276	5e-05	0.000238134	Ups	ldb2b	_	molecular_function:transcription factor binding transcription factor activity(GO:0000989);cellular_component:nucleus(GO:0005634);biological_process:regulation of transcription from RNA polymerase II promoter(GO:0006357);molecular_function:LIM domain binding(GO:0030274)
ENSDART00000043946	ENSDARG00000032005	6:7264728-7270343	3.71923	1.297	-1.51983	-4.93243	5e-05	0.000238134	Down	ccdc65	_	biological_process:regulation of cilium movement(GO:0003352)
ENSDART00000044085	ENSDARG00000034211	22:26423302-26456204	6.67774	0.174421	-5.25872	-8.73885	5e-05	0.000238134	Down	capn2l	K03853	molecular_function:calcium-dependent cysteine-type endopeptidase activity(GO:0004198);molecular_function:calcium-dependent cysteine-type endopeptidase activity(GO:0004198);molecular_function:calcium ion binding(GO:0005509);cellular_component:intracellular(GO:0005622);cellular_component:cytoplasm(GO:0005737);biological_process:proteolysis(GO:0006508);molecular_function:peptidase activity(GO:000823…
ENSDART00000044328	ENSDARG00000044142	17:25815555-25835531	2.89036	1.30324	-1.14914	-3.14551	5e-05	0.000238134	Down	acss1	K01895	molecular_function:nucleotide binding(GO:0000166);molecular_function:catalytic activity(GO:0003824);molecular_function:acetate-CoA ligase activity(GO:0003987);molecular_function:ATP binding(GO:0005524);cellular_component:cellular_component(GO:0005575);biological_process:metabolic process(GO:0008152);molecular_function:AMP binding(GO:0016208);molecular_function:ligase activity(GO:0016874);biologic…
ENSDART00000044504	ENSDARG00000012126	21:12969716-12988254	0.544614	2.00906	1.88321	4.70807	5e-05	0.000238134	Ups	zgc:109965	_	biological_process:regulation of signal transduction(GO:0009966);cellular_component:membrane(GO:0016020);cellular_component:integral component of membrane(GO:0016021)
ENSDART00000044574	ENSDARG00000041609	22:12616798-12669060	1.63614	3.81943	1.22306	3.83157	5e-05	0.000238134	Ups	adarb1a	K13194	molecular_function:RNA binding(GO:0003723);molecular_function:adenosine deaminase activity(GO:0004000);biological_process:RNA processing(GO:0006396);biological_process:nervous system development(GO:0007399);biological_process:neural crest cell development(GO:0014032);biological_process:embryonic cranial skeleton morphogenesis(GO:0048701);biological_process:anterior lateral line development(GO:004…
ENSDART00000045299	ENSDARG00000044565	6:10505838-10518080	108.436	53.9827	-1.00628	-2.95566	5e-05	0.000238134	Down	ola1	K19788	molecular_function:nucleotide binding(GO:0000166);molecular_function:ATP binding(GO:0005524);molecular_function:GTP binding(GO:0005525);cellular_component:nucleus(GO:0005634);cellular_component:nucleolus(GO:0005730);cellular_component:cytoplasm(GO:0005737);cellular_component:cytoplasm(GO:0005737);molecular_function:hydrolase activity(GO:0016787);molecular_function:ATPase activity(GO:0016887);mole…
ENSDART00000045529	ENSDARG00000046143	8:39640932-39669962	2.33405	0.598061	-1.96447	-2.26077	0.00535	0.0168547	Down	prkab1b	_	biological_process:signal transduction(GO:0007165);molecular_function:kinase activity(GO:0016301);biological_process:phosphorylation(GO:0016310);molecular_function:transferase activity(GO:0016740);cellular_component:AMP-activated protein kinase complex(GO:0031588);biological_process:regulation of protein kinase activity(GO:0045859)
ENSDART00000045549	ENSDARG00000031814	15:24628238-24633797	8.26729	3.60594	-1.19704	-3.18702	5e-05	0.000238134	Down	dhrs13b	_	cellular_component:membrane(GO:0016020);cellular_component:integral component of membrane(GO:0016021)
ENSDART00000045574	ENSDARG00000034138	5:21563769-21566429	4.65193	1.98321	-1.22999	-3.93361	5e-05	0.000238134	Down	shisa2	_	molecular_function:molecular_function(GO:0003674);biological_process:biological_process(GO:0008150);cellular_component:membrane(GO:0016020);cellular_component:integral component of membrane(GO:0016021)
ENSDART00000045588	ENSDARG00000033802	9:38599195-38609345	1.60044	3.24668	1.0205	4.08218	5e-05	0.000238134	Ups	cyp27a7	_	molecular_function:monooxygenase activity(GO:0004497);molecular_function:iron ion binding(GO:0005506);molecular_function:oxidoreductase activity(GO:0016491);molecular_function:oxidoreductase activity, acting on paired donors, with incorporation or reduction of molecular oxygen(GO:0016705);molecular_function:heme binding(GO:0020037);molecular_function:metal ion binding(GO:0046872);biological_proce…
ENSDART00000045628	ENSDARG00000034420	7:35163780-35332478	0.169602	1.28736	2.92419	4.11131	0.0005	0.00202494	Ups	irx6a	_	molecular_function:DNA binding(GO:0003677);cellular_component:nucleus(GO:0005634);biological_process:regulation of transcription, DNA-templated(GO:0006355);molecular_function:sequence-specific DNA binding(GO:0043565)
ENSDART00000045809	ENSDARG00000034559	14:35102196-35121834	1.08948	0.523763	-1.05665	-2.35382	0.00195	0.0069261	Down	srpx2	K19408	biological_process:angiogenesis(GO:0001525);biological_process:single organismal cell-cell adhesion(GO:0016337);biological_process:cell motility(GO:0048870)
ENSDART00000045816	ENSDARG00000023111	20:42791377-42805774	65.7536	29.0723	-1.17743	-23.9837	5e-05	0.000238134	Down	plg	K01315	molecular_function:serine-type endopeptidase activity(GO:0004252);cellular_component:extracellular region(GO:0005576);biological_process:proteolysis(GO:0006508);biological_process:blood coagulation(GO:0007596);biological_process:hemostasis(GO:0007599);molecular_function:peptidase activity(GO:0008233);molecular_function:serine-type peptidase activity(GO:0008236);molecular_function:hydrolase activi…
ENSDART00000045842	ENSDARG00000032623	17:26861333-26908186	1.74536	3.57921	1.03611	3.24264	5e-05	0.000238134	Ups	rcan3	_	molecular_function:nucleotide binding(GO:0000166);cellular_component:cytoplasm(GO:0005737);molecular_function:calcium-dependent protein serine/threonine phosphatase regulator activity(GO:0008597);biological_process:calcium-mediated signaling(GO:0019722);biological_process:regulation of calcineurin-NFAT signaling cascade(GO:0070884)
ENSDART00000045881	ENSDARG00000001129	17:19400152-19446478	4.38946	1.53689	-1.51403	-9.09386	5e-05	0.000238134	Down	dicer1	K11592	molecular_function:nucleotide binding(GO:0000166);molecular_function:DNA binding(GO:0003677);molecular_function:RNA binding(GO:0003723);molecular_function:helicase activity(GO:0004386);molecular_function:nuclease activity(GO:0004518);molecular_function:endonuclease activity(GO:0004519);molecular_function:ribonuclease III activity(GO:0004525);molecular_function:ribonuclease III activity(GO:0004525…
ENSDART00000045884	ENSDARG00000029936	1:127249-596152	2.38047	4.95951	1.05895	2.60626	0.0023	0.00800308	Ups	grtp1a	_	molecular_function:GTPase activator activity(GO:0005096);molecular_function:GTPase activator activity(GO:0005096);cellular_component:intracellular(GO:0005622);biological_process:intracellular protein transport(GO:0006886);cellular_component:endomembrane system(GO:0012505);molecular_function:Rab GTPase binding(GO:0017137);biological_process:regulation of vesicle fusion(GO:0031338);biological_proce…
ENSDART00000046253	ENSDARG00000034173	4:25402042-25454181	1.36913	0.503665	-1.44272	-5.36079	5e-05	0.000238134	Down	prkcq	K18052	molecular_function:nucleotide binding(GO:0000166);molecular_function:protein kinase activity(GO:0004672);molecular_function:protein serine/threonine kinase activity(GO:0004674);molecular_function:protein serine/threonine kinase activity(GO:0004674);molecular_function:protein kinase C activity(GO:0004697);molecular_function:ATP binding(GO:0005524);cellular_component:intracellular(GO:0005622);biolo…
ENSDART00000046360	ENSDARG00000019709	13:24241364-24248821	10.8693	5.37667	-1.01547	-7.74175	5e-05	0.000238134	Down	rhoua	K07865	molecular_function:GTP binding(GO:0005525);biological_process:small GTPase mediated signal transduction(GO:0007264);biological_process:regulation of cell adhesion(GO:0030155);biological_process:atrioventricular canal development(GO:0036302)
ENSDART00000046784	ENSDARG00000033567	23:16762076-16765969	21.6372	44.9665	1.05534	5.89317	5e-05	0.000238134	Ups	fkbp1ab	K09568	molecular_function:peptidyl-prolyl cis-trans isomerase activity(GO:0003755);molecular_function:FK506 binding(GO:0005528);cellular_component:endoplasmic reticulum membrane(GO:0005789);biological_process:protein folding(GO:0006457);biological_process:chaperone-mediated protein folding(GO:0061077)
ENSDART00000047094	ENSDARG00000079348	3:1338452-1602878	0.390525	0.911799	1.2233	2.64798	0.00095	0.00364112	Ups	GRIN2B (1 of many)	K05210	_
ENSDART00000047220	ENSDARG00000029242	7:38432079-38443304	0.196909	0.880373	2.16058	2.40411	0.01745	0.0474525	Ups	fbxo3	K10290	molecular_function:molecular_function(GO:0003674);cellular_component:cellular_component(GO:0005575)
ENSDART00000047555	ENSDARG00000002249	18:12495742-13088281	1.58461	3.72444	1.2329	3.01567	0.00055	0.00220876	Ups	tbxas1	K01832	molecular_function:monooxygenase activity(GO:0004497);molecular_function:iron ion binding(GO:0005506);cellular_component:membrane(GO:0016020);cellular_component:integral component of membrane(GO:0016021);molecular_function:oxidoreductase activity(GO:0016491);molecular_function:oxidoreductase activity, acting on paired donors, with incorporation or reduction of molecular oxygen(GO:0016705);molecul…
ENSDART00000047653	ENSDARG00000034718	9:42618848-42682661	18.4428	7.46671	-1.30452	-11.1217	5e-05	0.000238134	Down	tfpia	K03909	molecular_function:serine-type endopeptidase inhibitor activity(GO:0004867);cellular_component:extracellular region(GO:0005576);biological_process:blood coagulation(GO:0007596);biological_process:negative regulation of peptidase activity(GO:0010466);molecular_function:peptidase inhibitor activity(GO:0030414)
ENSDART00000047772	ENSDARG00000030094	17:22082954-22086705	2.31186	0	-inf	-nan	5e-05	0.000238134	Down	mal	_	biological_process:biological_process(GO:0008150);cellular_component:membrane(GO:0016020);cellular_component:integral component of membrane(GO:0016021)
ENSDART00000048432	ENSDARG00000041926	5:67772345-67867301	0.473159	1.32987	1.49089	3.05563	0.00025	0.00107263	Ups	DLG4	_	_
ENSDART00000048532	ENSDARG00000061120	10:24335028-24422264	82.2781	39.9029	-1.04401	-5.38401	5e-05	0.000238134	Down	slc43a2b	K08229	cellular_component:integral component of plasma membrane(GO:0005887);molecular_function:neutral amino acid transmembrane transporter activity(GO:0015175);molecular_function:L-amino acid transmembrane transporter activity(GO:0015179);cellular_component:membrane(GO:0016020);cellular_component:integral component of membrane(GO:0016021);biological_process:transmembrane transport(GO:0055085)
ENSDART00000048838	ENSDARG00000093774	2:39050426-39052199	10.2445	27.1366	1.40539	10.3447	5e-05	0.000238134	Ups	rbp2b	_	molecular_function:transporter activity(GO:0005215);biological_process:transport(GO:0006810);molecular_function:lipid binding(GO:0008289)
ENSDART00000048994	ENSDARG00000013615	8:33920776-34077023	9.16841	18.774	1.03399	4.29254	5e-05	0.000238134	Ups	pbx3b	K15610	molecular_function:DNA binding(GO:0003677);molecular_function:sequence-specific DNA binding transcription factor activity(GO:0003700);cellular_component:nucleus(GO:0005634);biological_process:regulation of transcription, DNA-templated(GO:0006355);molecular_function:sequence-specific DNA binding(GO:0043565)
ENSDART00000049154	ENSDARG00000031737	4:598914-613102	0.814489	1.6434	1.01272	2.17988	0.00465	0.0149059	Ups	pthlha	_	biological_process:osteoblast development(GO:0002076);molecular_function:hormone activity(GO:0005179);molecular_function:hormone activity(GO:0005179);cellular_component:extracellular region(GO:0005576);cellular_component:extracellular space(GO:0005615);biological_process:adenylate cyclase-activating G-protein coupled receptor signaling pathway(GO:0007189);biological_process:bone mineralization(GO…
ENSDART00000049167	ENSDARG00000033144	12:13280828-13298734	0.706848	1.4971	1.0827	2.04368	0.00465	0.0149059	Ups	psme2	K06697	cellular_component:proteasome complex(GO:0000502);cellular_component:proteasome complex(GO:0000502);cellular_component:cytoplasm(GO:0005737);cellular_component:proteasome activator complex(GO:0008537);molecular_function:endopeptidase activator activity(GO:0061133);biological_process:regulation of proteasomal protein catabolic process(GO:0061136);biological_process:regulation of G1/S transition of…
ENSDART00000049323	ENSDARG00000019658	16:11027349-11100338	2.10658	0.825416	-1.35171	-3.39974	0.0003	0.00126972	Down	pou2f2a	K09364	molecular_function:DNA binding(GO:0003677);molecular_function:sequence-specific DNA binding transcription factor activity(GO:0003700);cellular_component:nucleus(GO:0005634);biological_process:transcription, DNA-templated(GO:0006351);biological_process:regulation of transcription, DNA-templated(GO:0006355);molecular_function:sequence-specific DNA binding(GO:0043565)
ENSDART00000049339	ENSDARG00000031664	6:7257045-7258174	24.1996	7.99623	-1.59759	-10.8556	5e-05	0.000238134	Down	sox21a	_	biological_process:negative regulation of transcription from RNA polymerase II promoter(GO:0000122);biological_process:negative regulation of transcription from RNA polymerase II promoter(GO:0000122);molecular_function:sequence-specific DNA binding RNA polymerase II transcription factor activity(GO:0000981);molecular_function:DNA binding(GO:0003677);molecular_function:DNA binding(GO:0003677);mole…
ENSDART00000049420	ENSDARG00000010420	16:31553811-31559300	3.20553	8.3494	1.38111	7.56685	5e-05	0.000238134	Ups	ndrg1b	_	cellular_component:cytoplasm(GO:0005737);biological_process:signal transduction(GO:0007165);biological_process:peripheral nervous system myelin maintenance(GO:0032287);biological_process:regulation of cell proliferation(GO:0042127);biological_process:mast cell activation(GO:0045576)
ENSDART00000050445	ENSDARG00000031817	1:24631615-24679452	0.373236	0.851387	1.18973	2.84553	0.00115	0.00432461	Ups	trim2a	K11997	cellular_component:intracellular(GO:0005622);molecular_function:zinc ion binding(GO:0008270);biological_process:myeloid cell differentiation(GO:0030099);molecular_function:metal ion binding(GO:0046872);biological_process:primitive hemopoiesis(GO:0060215)
ENSDART00000050576	ENSDARG00000005159	3:56339737-56526849	2.56558	0.575671	-2.15597	-4.30078	5e-05	0.000238134	Down	cyth3b	K18441	molecular_function:ARF guanyl-nucleotide exchange factor activity(GO:0005086);biological_process:regulation of ARF protein signal transduction(GO:0032012)
ENSDART00000050750	ENSDARG00000033367	19:33329251-33341366	5.78514	2.71993	-1.08878	-3.33536	0.00015	0.000666878	Down	rrm2b	_	molecular_function:ribonucleoside-diphosphate reductase activity, thioredoxin disulfide as acceptor(GO:0004748);cellular_component:cytoplasm(GO:0005737);cellular_component:ribonucleoside-diphosphate reductase complex(GO:0005971);biological_process:cellular response to DNA damage stimulus(GO:0006974);biological_process:deoxyribonucleoside diphosphate metabolic process(GO:0009186);biological_proces…
ENSDART00000050762	ENSDARG00000019304	11:1396148-1483185	0.980903	2.4079	1.29559	3.34808	5e-05	0.000238134	Ups	phactr3b	K17594	molecular_function:actin binding(GO:0003779);cellular_component:cellular_component(GO:0005575);biological_process:biological_process(GO:0008150);molecular_function:protein phosphatase 1 binding(GO:0008157)
ENSDART00000051222	ENSDARG00000035350	5:37254531-37257543	47.5103	14.2578	-1.73649	-8.39584	5e-05	0.000238134	Down	ins	K04526	molecular_function:hormone activity(GO:0005179);cellular_component:extracellular region(GO:0005576);biological_process:carbohydrate metabolic process(GO:0005975);biological_process:glucose metabolic process(GO:0006006);biological_process:response to glucose(GO:0009749);biological_process:response to nutrient levels(GO:0031667);biological_process:negative regulation of feeding behavior(GO:2000252)
ENSDART00000051224	ENSDARG00000035352	5:37339567-37373400	3.88728	7.9379	1.03	7.7246	5e-05	0.000238134	Ups	pafah1b2	K16795	cellular_component:cytoplasm(GO:0005737);biological_process:brain development(GO:0007420);molecular_function:platelet-activating factor acetyltransferase activity(GO:0047179)
ENSDART00000051516	ENSDARG00000035533	5:27560418-27615651	0.731489	0.226039	-1.69427	-3.62085	5e-05	0.000238134	Down	tacr1a	K04222	molecular_function:signal transducer activity(GO:0004871);molecular_function:G-protein coupled receptor activity(GO:0004930);molecular_function:tachykinin receptor activity(GO:0004995);cellular_component:plasma membrane(GO:0005886);cellular_component:integral component of plasma membrane(GO:0005887);biological_process:signal transduction(GO:0007165);biological_process:cell surface receptor signal…
ENSDART00000051541	ENSDARG00000035555	5:23345846-23351647	6.06591	1.92365	-1.65688	-6.0168	5e-05	0.000238134	Down	gbgt1l3	_	cellular_component:Golgi apparatus(GO:0005794);biological_process:carbohydrate metabolic process(GO:0005975);biological_process:glycolipid biosynthetic process(GO:0009247);cellular_component:membrane(GO:0016020);cellular_component:integral component of membrane(GO:0016021);molecular_function:transferase activity(GO:0016740);molecular_function:transferase activity, transferring glycosyl groups(GO:…
ENSDART00000051612	ENSDARG00000035603	5:19667159-19681865	12.5374	4.90101	-1.35509	-7.62535	5e-05	0.000238134	Down	dao.2	K00273	molecular_function:D-amino-acid oxidase activity(GO:0003884);molecular_function:oxidoreductase activity(GO:0016491);biological_process:D-amino acid metabolic process(GO:0046416);biological_process:oxidation-reduction process(GO:0055114);molecular_function:FAD binding(GO:0071949)
ENSDART00000051825	ENSDARG00000007369	8:52121214-52243593	8.82588	3.33153	-1.40556	-2.43177	0.0019	0.00676523	Down	tcf7l1b	_	molecular_function:DNA binding(GO:0003677);molecular_function:sequence-specific DNA binding transcription factor activity(GO:0003700);cellular_component:nucleus(GO:0005634);cellular_component:transcription factor complex(GO:0005667);biological_process:transcription, DNA-templated(GO:0006351);biological_process:regulation of transcription, DNA-templated(GO:0006355);biological_process:regulation of…
ENSDART00000051948	ENSDARG00000035797	16:18235422-18246297	0.108508	0.770513	2.82802	2.32891	0.0125	0.0354965	Ups	si:dkey-17m8.2	_	_
ENSDART00000052001	ENSDARG00000035835	12:10344113-10372127	37.1646	10.6361	-1.80496	-20.0745	5e-05	0.000238134	Down	eef2k	K08292	molecular_function:translation elongation factor activity(GO:0003746);molecular_function:protein serine/threonine kinase activity(GO:0004674);molecular_function:protein serine/threonine kinase activity(GO:0004674);molecular_function:elongation factor-2 kinase activity(GO:0004686);molecular_function:calcium ion binding(GO:0005509);molecular_function:calmodulin binding(GO:0005516);molecular_functio…
ENSDART00000052113	ENSDARG00000035899	7:48187462-48212141	1.26265	3.78089	1.58227	7.53867	5e-05	0.000238134	Ups	lingo1b	_	molecular_function:epidermal growth factor receptor binding(GO:0005154);molecular_function:protein binding(GO:0005515);cellular_component:plasma membrane(GO:0005886);biological_process:signal transduction(GO:0007165);biological_process:axonogenesis(GO:0007409);cellular_component:membrane(GO:0016020);cellular_component:integral component of membrane(GO:0016021);biological_process:myelination(GO:00…
ENSDART00000052236	ENSDARG00000035984	7:40367192-40369989	3.91283	1.79176	-1.12683	-4.0606	5e-05	0.000238134	Down	mnx1	K08025	biological_process:type B pancreatic cell differentiation(GO:0003309);molecular_function:DNA binding(GO:0003677);molecular_function:sequence-specific DNA binding transcription factor activity(GO:0003700);molecular_function:sequence-specific DNA binding transcription factor activity(GO:0003700);cellular_component:nucleus(GO:0005634);cellular_component:nucleus(GO:0005634);biological_process:regulat…
ENSDART00000052329	ENSDARG00000036043	7:38473665-38478939	0.714577	1.44458	1.01549	3.05277	0.0002	0.000872038	Ups	znf408	_	cellular_component:nucleus(GO:0005634);biological_process:retina vasculature development in camera-type eye(GO:0061298)
ENSDART00000052332	ENSDARG00000036045	7:58384419-58393646	6.27236	2.24383	-1.48305	-5.76916	5e-05	0.000238134	Down	penkb	_	molecular_function:neuropeptide hormone activity(GO:0005184);cellular_component:extracellular region(GO:0005576);cellular_component:plasma membrane(GO:0005886);biological_process:neuropeptide signaling pathway(GO:0007218);biological_process:neuropeptide signaling pathway(GO:0007218);biological_process:synaptic transmission(GO:0007268);biological_process:sensory perception(GO:0007600);cellular_com…
ENSDART00000052385	ENSDARG00000036082	7:32835181-32843734	2.71006	0.89682	-1.59543	-5.3105	5e-05	0.000238134	Down	tph1b	K00502	molecular_function:monooxygenase activity(GO:0004497);molecular_function:tryptophan 5-monooxygenase activity(GO:0004510);molecular_function:iron ion binding(GO:0005506);biological_process:metabolic process(GO:0008152);biological_process:aromatic amino acid family metabolic process(GO:0009072);molecular_function:amino acid binding(GO:0016597);molecular_function:oxidoreductase activity, acting on p…
ENSDART00000052683	ENSDARG00000052207	1:55560377-55651273	3.31291	1.19328	-1.47317	-8.68829	5e-05	0.000238134	Down	c3a.3	K03990	molecular_function:endopeptidase inhibitor activity(GO:0004866);cellular_component:extracellular region(GO:0005576);cellular_component:extracellular space(GO:0005615)
ENSDART00000052703	ENSDARG00000036291	18:38210337-38235576	11.9702	4.66423	-1.35973	-8.98833	5e-05	0.000238134	Down	nucb2b	K20371	molecular_function:calcium ion binding(GO:0005509)
ENSDART00000052871	ENSDARG00000036394	7:21620924-21652539	16.6089	35.0615	1.07794	7.11385	5e-05	0.000238134	Ups	pop7	K14527	molecular_function:nucleic acid binding(GO:0003676);molecular_function:ribonuclease P activity(GO:0004526);molecular_function:ribonuclease P activity(GO:0004526);cellular_component:nucleus(GO:0005634);cellular_component:nucleus(GO:0005634);biological_process:tRNA processing(GO:0008033);biological_process:tRNA processing(GO:0008033);biological_process:RNA phosphodiester bond hydrolysis, endonucleo…
ENSDART00000052898	ENSDARG00000036412	19:9172747-9188138	0.234906	0.578981	1.30144	1.9591	0.01265	0.0358977	Ups	LRRC71	_	_
ENSDART00000052909	ENSDARG00000036422	7:20179095-20201693	0.544511	1.20972	1.15164	3.15025	0.00015	0.000666878	Ups	ntn5	_	_
ENSDART00000052977	ENSDARG00000036463	7:20371258-20565212	2.92275	7.53287	1.36587	3.36412	5e-05	0.000238134	Ups	cldn15a	K06087	molecular_function:structural molecule activity(GO:0005198);cellular_component:plasma membrane(GO:0005886);cellular_component:cell-cell junction(GO:0005911);cellular_component:bicellular tight junction(GO:0005923);cellular_component:bicellular tight junction(GO:0005923);cellular_component:membrane(GO:0016020);cellular_component:integral component of membrane(GO:0016021);cellular_component:cell ju…
ENSDART00000053183	ENSDARG00000036613	6:94527-436629	8.53195	4.19746	-1.02336	-2.86578	5e-05	0.000238134	Down	tab1	K04403	molecular_function:catalytic activity(GO:0003824);molecular_function:protein serine/threonine phosphatase activity(GO:0004722);biological_process:protein dephosphorylation(GO:0006470)
ENSDART00000053444	ENSDARG00000036809	7:15125124-15164732	1.70353	3.49829	1.03812	4.09974	5e-05	0.000238134	Ups	ANPEP (1 of many)	K11140	cellular_component:cytoplasm(GO:0005737);cellular_component:plasma membrane(GO:0005886);biological_process:proteolysis(GO:0006508);biological_process:proteolysis(GO:0006508);molecular_function:metallopeptidase activity(GO:0008237);molecular_function:zinc ion binding(GO:0008270);molecular_function:zinc ion binding(GO:0008270);cellular_component:membrane(GO:0016020);cellular_component:integral comp…
ENSDART00000053521	ENSDARG00000003203	7:14045859-14057253	4.87512	0.348552	-3.80599	-7.39072	5e-05	0.000238134	Down	rhcga	K06580	cellular_component:integral component of plasma membrane(GO:0005887);molecular_function:ammonium transmembrane transporter activity(GO:0008519);molecular_function:ammonium transmembrane transporter activity(GO:0008519);biological_process:organic cation transport(GO:0015695);biological_process:ammonium transport(GO:0015696);cellular_component:membrane(GO:0016020);cellular_component:integral compon…
ENSDART00000053750	ENSDARG00000078399	8:50853463-50899555	34.5788	12.6144	-1.45481	-18.1909	5e-05	0.000238134	Down	FO704819.2	_	_
ENSDART00000053768	ENSDARG00000036999	8:51061531-51158521	0.172651	0.6749	1.96682	3.33303	0.00065	0.00256625	Ups	DISP3	_	cellular_component:membrane(GO:0016020);cellular_component:integral component of membrane(GO:0016021)
ENSDART00000053776	ENSDARG00000037000	6:7271443-7281620	5.91465	1.46146	-2.01688	-2.80882	5e-05	0.000238134	Down	fkbp11	K09576	molecular_function:peptidyl-prolyl cis-trans isomerase activity(GO:0003755);molecular_function:FK506 binding(GO:0005528);cellular_component:endoplasmic reticulum membrane(GO:0005789);biological_process:protein folding(GO:0006457);cellular_component:membrane(GO:0016020);cellular_component:integral component of membrane(GO:0016021);biological_process:chaperone-mediated protein folding(GO:0061077);b…
ENSDART00000054020	ENSDARG00000037154	16:34367363-34387992	2.48529	1.20256	-1.04731	-3.93353	5e-05	0.000238134	Down	hivep3b	K09239	_
ENSDART00000054066	ENSDARG00000037178	1:29027827-29056964	18.495	8.41771	-1.13564	-11.0929	5e-05	0.000238134	Down	zic2b	K06235	molecular_function:nucleic acid binding(GO:0003676);biological_process:neural crest cell development(GO:0014032);biological_process:hindbrain development(GO:0030902);molecular_function:metal ion binding(GO:0046872);biological_process:regulation of retinoic acid receptor signaling pathway(GO:0048385);biological_process:embryonic viscerocranium morphogenesis(GO:0048703)
ENSDART00000054183	ENSDARG00000037244	14:26141121-26152596	7.77236	2.6483	-1.55329	-8.19072	5e-05	0.000238134	Down	gpr137	_	biological_process:biological_process(GO:0008150);cellular_component:membrane(GO:0016020);cellular_component:integral component of membrane(GO:0016021)
ENSDART00000054322	ENSDARG00000037337	13:959650-966726	0.448987	1.63672	1.86606	2.56379	0.0054	0.0169917	Ups	cnrip1b	_	_
ENSDART00000054338	ENSDARG00000037350	1:22578763-22583765	568.837	251.249	-1.1789	-7.39609	5e-05	0.000238134	Down	rpl9	K02940	biological_process:cytoplasmic translation(GO:0002181);molecular_function:RNA binding(GO:0003723);molecular_function:structural constituent of ribosome(GO:0003735);molecular_function:structural constituent of ribosome(GO:0003735);cellular_component:intracellular(GO:0005622);cellular_component:ribosome(GO:0005840);biological_process:translation(GO:0006412);molecular_function:rRNA binding(GO:001984…
ENSDART00000054469	ENSDARG00000037425	19:8687957-8689348	0.843364	4.52246	2.42288	4.73602	5e-05	0.000238134	Ups	s100a10a	_	molecular_function:calcium ion binding(GO:0005509);cellular_component:nucleus(GO:0005634);cellular_component:cytoplasm(GO:0005737);biological_process:regulation of cell proliferation(GO:0042127);molecular_function:metal ion binding(GO:0046872);molecular_function:calcium-dependent protein binding(GO:0048306)
ENSDART00000054736	ENSDARG00000037588	23:17729446-17912784	0.737679	6.91593	3.22886	8.39632	5e-05	0.000238134	Ups	bhlhe23	K09086	biological_process:regulation of transcription, DNA-templated(GO:0006355);molecular_function:protein dimerization activity(GO:0046983);biological_process:cell development(GO:0048468)
ENSDART00000054891	ENSDARG00000037691	14:2200810-2349164	0.821485	0.367089	-1.16211	-2.57216	0.00145	0.00531371	Down	pcdh2ab2	K16493	molecular_function:calcium ion binding(GO:0005509);cellular_component:plasma membrane(GO:0005886);biological_process:cell adhesion(GO:0007155);biological_process:homophilic cell adhesion via plasma membrane adhesion molecules(GO:0007156);cellular_component:membrane(GO:0016020);cellular_component:integral component of membrane(GO:0016021)
ENSDART00000055259	ENSDARG00000037913	3:34468232-34470154	1.19115	3.08426	1.37257	2.95152	0.0005	0.00202494	Ups	nmrk1	K10524	cellular_component:cellular_component(GO:0005575)
ENSDART00000055263	ENSDARG00000037917	3:34716263-34787533	0.756324	2.20729	1.5452	5.71169	5e-05	0.000238134	Ups	itga3a	K06482	biological_process:cell adhesion(GO:0007155);biological_process:integrin-mediated signaling pathway(GO:0007229);cellular_component:integrin complex(GO:0008305);cellular_component:membrane(GO:0016020);cellular_component:integral component of membrane(GO:0016021)
ENSDART00000055269	ENSDARG00000037921	3:35459703-35472725	7.34963	22.1351	1.59059	12.8861	5e-05	0.000238134	Ups	gng13b	K04547	molecular_function:signal transducer activity(GO:0004871);cellular_component:heterotrimeric G-protein complex(GO:0005834);cellular_component:plasma membrane(GO:0005886);biological_process:signal transduction(GO:0007165);biological_process:G-protein coupled receptor signaling pathway(GO:0007186);cellular_component:membrane(GO:0016020)
ENSDART00000055279	ENSDARG00000077126	3:31793352-31802060	69.2255	18.2273	-1.9252	-12.4348	5e-05	0.000238134	Down	snrnp70	K11093	molecular_function:nucleotide binding(GO:0000166);cellular_component:commitment complex(GO:0000243);biological_process:mRNA splicing, via spliceosome(GO:0000398);molecular_function:nucleic acid binding(GO:0003676);molecular_function:mRNA binding(GO:0003729);cellular_component:U1 snRNP(GO:0005685);cellular_component:virion(GO:0019012);cellular_component:viral nucleocapsid(GO:0019013);cellular_comp…
ENSDART00000055299	ENSDARG00000037946	3:32210202-32214186	6.47264	2.51657	-1.36289	-5.81115	5e-05	0.000238134	Down	prl	_	molecular_function:hormone activity(GO:0005179);cellular_component:extracellular region(GO:0005576);biological_process:multicellular organismal response to stress(GO:0033555);biological_process:negative regulation of apoptotic process(GO:0043066)
ENSDART00000055428	ENSDARG00000038025	3:24855596-24864069	3.13736	1.49423	-1.07015	-4.22962	5e-05	0.000238134	Down	cbx7a	K11454	cellular_component:nucleus(GO:0005634)
ENSDART00000055443	ENSDARG00000038040	24:18142007-18302185	0.96197	3.20275	1.73525	2.61714	0.00125	0.00465378	Ups	tpk1	K00949	molecular_function:thiamine diphosphokinase activity(GO:0004788);molecular_function:thiamine diphosphokinase activity(GO:0004788);molecular_function:ATP binding(GO:0005524);biological_process:thiamine metabolic process(GO:0006772);biological_process:thiamine diphosphate biosynthetic process(GO:0009229);biological_process:thiamine diphosphate biosynthetic process(GO:0009229);molecular_function:thi…
ENSDART00000055487	ENSDARG00000038064	17:43478193-43485742	7.46476	3.41096	-1.12992	-3.20505	5e-05	0.000238134	Down	chmp3	K12193	molecular_function:molecular_function(GO:0003674);cellular_component:cytoplasm(GO:0005737);cellular_component:endosome(GO:0005768);cellular_component:cytosol(GO:0005829);biological_process:transport(GO:0006810);biological_process:vacuolar transport(GO:0007034);biological_process:protein transport(GO:0015031);cellular_component:membrane(GO:0016020);cellular_component:late endosome membrane(GO:0031…
ENSDART00000055709	ENSDARG00000038205	11:41353999-41357664	36.0326	12.2462	-1.55697	-10.154	5e-05	0.000238134	Down	her2	_	cellular_component:chromatin(GO:0000785);molecular_function:sequence-specific DNA binding RNA polymerase II transcription factor activity(GO:0000981);molecular_function:DNA binding(GO:0003677);cellular_component:nucleus(GO:0005634);biological_process:transcription, DNA-templated(GO:0006351);biological_process:regulation of transcription, DNA-templated(GO:0006355);biological_process:neuroblast pro…
ENSDART00000055779	ENSDARG00000038248	1:2299201-2305391	3.49982	11.362	1.69887	11.3291	5e-05	0.000238134	Ups	ggact.2	K19761	molecular_function:gamma-glutamylcyclotransferase activity(GO:0003839);molecular_function:gamma-glutamylcyclotransferase activity(GO:0003839);cellular_component:cellular_component(GO:0005575);molecular_function:transferase activity(GO:0016740);molecular_function:transferase activity, transferring acyl groups(GO:0016746);biological_process:cellular modified amino acid catabolic process(GO:0042219)
ENSDART00000055936	ENSDARG00000053499	7:29721738-29726294	3.4109	7.38163	1.11379	6.93081	5e-05	0.000238134	Ups	isl2b	_	molecular_function:DNA binding(GO:0003677);cellular_component:nucleus(GO:0005634);biological_process:regulation of transcription, DNA-templated(GO:0006355);biological_process:multicellular organismal development(GO:0007275);molecular_function:zinc ion binding(GO:0008270);biological_process:exocrine pancreas development(GO:0031017);molecular_function:sequence-specific DNA binding(GO:0043565);molec…
ENSDART00000055956	ENSDARG00000038359	7:56807802-56828567	4.99758	10.1276	1.01899	5.46562	5e-05	0.000238134	Ups	enosf1	K18334	molecular_function:catalytic activity(GO:0003824);cellular_component:cellular_component(GO:0005575);biological_process:metabolic process(GO:0008152);biological_process:cellular amino acid catabolic process(GO:0009063)
ENSDART00000056095	ENSDARG00000038439	16:52626256-52631239	0	2.01136	inf	-nan	5e-05	0.000238134	Ups	fabp10a	_	molecular_function:transporter activity(GO:0005215);molecular_function:fatty acid binding(GO:0005504);cellular_component:cytoplasm(GO:0005737);biological_process:transport(GO:0006810);molecular_function:lipid binding(GO:0008289);molecular_function:bile acid binding(GO:0032052)
ENSDART00000056205	ENSDARG00000057649	19:20868403-20898001	1.52618	3.08653	1.01606	2.02607	0.00525	0.0165723	Ups	satb1a	_	molecular_function:DNA binding(GO:0003677);cellular_component:nucleus(GO:0005634);biological_process:regulation of transcription from RNA polymerase II promoter(GO:0006357);molecular_function:sequence-specific DNA binding(GO:0043565)
ENSDART00000056295	ENSDARG00000013968	13:4876337-4900378	396.651	144.241	-1.45938	-45.7788	5e-05	0.000238134	Down	psap	K12382	molecular_function:G-protein coupled receptor binding(GO:0001664);cellular_component:extracellular space(GO:0005615);cellular_component:cytoplasm(GO:0005737);cellular_component:lysosome(GO:0005764);biological_process:lipid metabolic process(GO:0006629);biological_process:sphingolipid metabolic process(GO:0006665);molecular_function:enzyme activator activity(GO:0008047)
ENSDART00000056328	ENSDARG00000027495	23:40517739-40545677	1.75192	5.41735	1.62865	8.19656	5e-05	0.000238134	Ups	elovl4b	K10249	cellular_component:endoplasmic reticulum(GO:0005783);cellular_component:endoplasmic reticulum membrane(GO:0005789);biological_process:lipid metabolic process(GO:0006629);biological_process:fatty acid metabolic process(GO:0006631);biological_process:fatty acid biosynthetic process(GO:0006633);biological_process:unsaturated fatty acid biosynthetic process(GO:0006636);molecular_function:fatty acid e…
ENSDART00000056420	ENSDARG00000038643	8:21321757-21340400	45.0233	20.721	-1.11958	-11.1364	5e-05	0.000238134	Down	alas2	K00643	biological_process:response to hypoxia(GO:0001666);molecular_function:catalytic activity(GO:0003824);molecular_function:5-aminolevulinate synthase activity(GO:0003870);molecular_function:5-aminolevulinate synthase activity(GO:0003870);cellular_component:mitochondrion(GO:0005739);cellular_component:mitochondrial inner membrane(GO:0005743);cellular_component:mitochondrial matrix(GO:0005759);biologi…
ENSDART00000056519	ENSDARG00000038700	2:37312630-37313702	2.25974	1.04309	-1.1153	-2.51953	0.00295	0.0099644	Down	gpr160	K08438	biological_process:biological_process(GO:0008150);cellular_component:membrane(GO:0016020);cellular_component:integral component of membrane(GO:0016021)
ENSDART00000056655	ENSDARG00000038792	2:33343303-33345470	12.7265	6.21904	-1.03307	-7.30182	5e-05	0.000238134	Down	klf17	K17846	molecular_function:nucleic acid binding(GO:0003676);molecular_function:DNA binding(GO:0003677);cellular_component:nucleus(GO:0005634);biological_process:negative regulation of gene expression(GO:0010629);biological_process:negative regulation of gene expression(GO:0010629);biological_process:hemopoiesis(GO:0030097);biological_process:myeloid cell differentiation(GO:0030099);biological_process:ery…
ENSDART00000057049	ENSDARG00000039066	13:2303262-2315264	2.24482	13.1032	2.54525	5.78031	5e-05	0.000238134	Ups	klhl31	K10467	molecular_function:ubiquitin-protein transferase activity(GO:0004842);biological_process:regulation of transcription, DNA-templated(GO:0006355);biological_process:skeletal muscle tissue development(GO:0007519);cellular_component:Cul3-RING ubiquitin ligase complex(GO:0031463)
ENSDART00000057185	ENSDARG00000013491	13:36034201-36058873	0.436221	1.06457	1.28714	2.27588	0.0091	0.0269299	Ups	map3k9	K04417	molecular_function:nucleotide binding(GO:0000166);molecular_function:protein kinase activity(GO:0004672);molecular_function:MAP kinase kinase kinase activity(GO:0004709);molecular_function:ATP binding(GO:0005524);biological_process:protein phosphorylation(GO:0006468)
ENSDART00000057224	ENSDARG00000039164	22:5323740-5328885	2.07902	0	-inf	-nan	5e-05	0.000238134	Down	mhc1uma	_	molecular_function:antigen binding(GO:0003823);cellular_component:plasma membrane(GO:0005886);cellular_component:membrane(GO:0016020);cellular_component:integral component of membrane(GO:0016021);biological_process:antigen processing and presentation(GO:0019882)
ENSDART00000057268	ENSDARG00000039196	2:11902142-12049695	6.19575	2.15709	-1.52219	-10.1874	5e-05	0.000238134	Down	greb1l	_	_
ENSDART00000057288	ENSDARG00000039211	7:26028660-26036965	3.80486	0.614944	-2.62932	-2.81156	5e-05	0.000238134	Down	zgc:77439	_	molecular_function:monooxygenase activity(GO:0004497);molecular_function:monooxygenase activity(GO:0004497);molecular_function:N,N-dimethylaniline monooxygenase activity(GO:0004499);cellular_component:cellular_component(GO:0005575);molecular_function:N-ethylmaleimide reductase activity(GO:0008748);molecular_function:oxidoreductase activity(GO:0016491);molecular_function:reduced coenzyme F420 dehy…
ENSDART00000057315	ENSDARG00000039229	8:51948489-51968033	1.20098	2.49625	1.05555	3.58488	5e-05	0.000238134	Ups	cep78	K16765	cellular_component:centrosome(GO:0005813)
ENSDART00000057382	ENSDARG00000039273	13:33024977-33040487	1.68321	3.79007	1.17101	4.59017	5e-05	0.000238134	Ups	fbln5	K17340	molecular_function:calcium ion binding(GO:0005509)
ENSDART00000057528	ENSDARG00000039365	13:29794946-29805809	1.48507	3.38195	1.18732	2.94465	5e-05	0.000238134	Ups	cuedc2	_	cellular_component:nucleus(GO:0005634);cellular_component:cytoplasm(GO:0005737)
ENSDART00000057599	ENSDARG00000039422	13:24453950-24457770	1.17119	2.71719	1.21414	2.59626	0.0009	0.00346102	Ups	fuom	K02431	biological_process:monosaccharide metabolic process(GO:0005996);biological_process:fucose metabolic process(GO:0006004);molecular_function:isomerase activity(GO:0016853);molecular_function:racemase and epimerase activity, acting on carbohydrates and derivatives(GO:0016857);molecular_function:fucose binding(GO:0042806);molecular_function:monosaccharide binding(GO:0048029)
ENSDART00000057644	ENSDARG00000039458	8:14416227-14446894	2.89337	6.3575	1.13571	7.24717	5e-05	0.000238134	Ups	lhx4	K09374	molecular_function:DNA binding(GO:0003677);cellular_component:nucleus(GO:0005634);biological_process:regulation of transcription, DNA-templated(GO:0006355);molecular_function:zinc ion binding(GO:0008270);biological_process:ventral spinal cord interneuron specification(GO:0021521);molecular_function:sequence-specific DNA binding(GO:0043565);molecular_function:metal ion binding(GO:0046872)
ENSDART00000057651	ENSDARG00000039466	13:22733065-22741967	3.91958	1.57485	-1.31548	-3.12058	0.00035	0.00146175	Down	hnrnph3	_	molecular_function:nucleotide binding(GO:0000166);molecular_function:nucleic acid binding(GO:0003676);biological_process:biological_process(GO:0008150)
ENSDART00000057697	ENSDARG00000039490	15:28477787-28492135	1.57178	3.84776	1.29163	2.89081	0.00065	0.00256625	Ups	pitpnaa	_	molecular_function:molecular_function(GO:0003674);cellular_component:intracellular(GO:0005622);cellular_component:nucleus(GO:0005634);cellular_component:cytosol(GO:0005829);biological_process:transport(GO:0006810);biological_process:axonogenesis(GO:0007409);biological_process:chordate embryonic development(GO:0043009)
ENSDART00000057825	ENSDARG00000039579	13:13550688-13553342	9.80741	24.3936	1.31456	8.29031	5e-05	0.000238134	Ups	cfd	K01334	molecular_function:serine-type endopeptidase activity(GO:0004252);cellular_component:cellular_component(GO:0005575);biological_process:proteolysis(GO:0006508);molecular_function:peptidase activity(GO:0008233);molecular_function:serine-type peptidase activity(GO:0008236);molecular_function:hydrolase activity(GO:0016787)
ENSDART00000058027	ENSDARG00000039697	17:21275295-21348939	3.40451	1.5644	-1.12184	-4.22999	5e-05	0.000238134	Down	shtn1	_	cellular_component:cytoplasm(GO:0005737);cellular_component:cytoskeleton(GO:0005856);cellular_component:microtubule associated complex(GO:0005875);biological_process:substrate-dependent cell migration, cell extension(GO:0006930);biological_process:Ras protein signal transduction(GO:0007265);biological_process:multicellular organismal development(GO:0007275);biological_process:axonogenesis(GO:0007…
ENSDART00000058111	ENSDARG00000005364	2:26161208-26501150	0.355713	0.951436	1.41939	2.55999	0.0026	0.00892591	Ups	grin3ba	K05214	molecular_function:receptor activity(GO:0004872);molecular_function:ionotropic glutamate receptor activity(GO:0004970);molecular_function:N-methyl-D-aspartate selective glutamate receptor activity(GO:0004972);molecular_function:ion channel activity(GO:0005216);molecular_function:extracellular-glutamate-gated ion channel activity(GO:0005234);cellular_component:plasma membrane(GO:0005886);biologica…
ENSDART00000058336	ENSDARG00000039880	25:7478820-7546563	12.3839	30.4553	1.29823	9.53734	5e-05	0.000238134	Ups	arpp19b	_	molecular_function:protein phosphatase inhibitor activity(GO:0004864);cellular_component:cytoplasm(GO:0005737);biological_process:negative regulation of protein dephosphorylation(GO:0035308)
ENSDART00000058471	ENSDARG00000069833	16:33188703-33198552	7.07829	3.49455	-1.01829	-2.31278	0.0035	0.0115732	Down	rhbdl2	_	molecular_function:serine-type endopeptidase activity(GO:0004252);molecular_function:serine-type endopeptidase activity(GO:0004252);cellular_component:mitochondrial inner membrane(GO:0005743);biological_process:proteolysis(GO:0006508);molecular_function:peptidase activity(GO:0008233);cellular_component:membrane(GO:0016020);cellular_component:integral component of membrane(GO:0016021);cellular_com…
ENSDART00000058647	ENSDARG00000040100	18:8914253-8927773	4.09742	8.39579	1.03495	6.76355	5e-05	0.000238134	Ups	si:dkey-95h12.1	_	molecular_function:carbohydrate binding(GO:0030246)
ENSDART00000058685	ENSDARG00000040123	16:43871447-44179878	0.393909	2.25146	2.51492	7.56164	5e-05	0.000238134	Ups	zfpm2a	K17442	molecular_function:RNA polymerase II core promoter proximal region sequence-specific DNA binding transcription factor activity involved in negative regulation of transcription(GO:0001078);molecular_function:RNA polymerase II transcription factor binding(GO:0001085);molecular_function:nucleic acid binding(GO:0003676);molecular_function:protein binding(GO:0005515);cellular_component:nucleus(GO:0005…
ENSDART00000058965	ENSDARG00000040295	16:24045711-24048429	1999.69	862.979	-1.21238	-50.3387	5e-05	0.000238134	Down	apoeb	K04524	molecular_function:beta-amyloid binding(GO:0001540);molecular_function:phospholipid binding(GO:0005543);cellular_component:extracellular region(GO:0005576);biological_process:cholesterol biosynthetic process(GO:0006695);biological_process:cholesterol catabolic process(GO:0006707);biological_process:transport(GO:0006810);biological_process:lipid transport(GO:0006869);molecular_function:lipid bindi…
ENSDART00000059063	ENSDARG00000040362	18:44656349-44669790	30.7181	10.1931	-1.59149	-21.3896	5e-05	0.000238134	Down	ehd2b	K12469	molecular_function:calcium ion binding(GO:0005509);molecular_function:GTP binding(GO:0005525);cellular_component:cellular_component(GO:0005575);biological_process:actin cytoskeleton organization(GO:0030036);biological_process:endocytic recycling(GO:0032456)
ENSDART00000059193	ENSDARG00000040442	25:396319-440695	5.83597	0.705685	-3.04788	-12.5839	5e-05	0.000238134	Down	prtgb	_	biological_process:multicellular organismal development(GO:0007275);cellular_component:membrane(GO:0016020);cellular_component:integral component of membrane(GO:0016021)
ENSDART00000059228	ENSDARG00000040466	9:45109815-45152397	0.0711276	0.994853	3.806	3.7361	0.0149	0.0413956	Ups	vil1	K05761	molecular_function:actin binding(GO:0003779);molecular_function:calcium ion binding(GO:0005509);molecular_function:phosphatidylinositol-4,5-bisphosphate binding(GO:0005546);biological_process:cytoskeleton organization(GO:0007010);biological_process:actin nucleation(GO:0045010);biological_process:actin filament severing(GO:0051014);molecular_function:actin filament binding(GO:0051015);biological_p…
ENSDART00000059307	ENSDARG00000040523	23:5631615-5653957	2.32675	0.447876	-2.37715	-2.24739	0.01715	0.0467207	Down	smpd2a	K12351	biological_process:MAPK cascade(GO:0000165);molecular_function:sphingomyelin phosphodiesterase activity(GO:0004767);molecular_function:sphingomyelin phosphodiesterase activity(GO:0004767);cellular_component:Golgi apparatus(GO:0005794);biological_process:sphingomyelin metabolic process(GO:0006684);cellular_component:membrane(GO:0016020);cellular_component:integral component of membrane(GO:0016021)…
ENSDART00000059321	ENSDARG00000040534	13:8508748-8511340	96.502	11.0901	-3.12129	-30.1303	5e-05	0.000238134	Down	epcam	K06737	biological_process:liver development(GO:0001889);biological_process:liver development(GO:0001889);biological_process:morphogenesis of an epithelium(GO:0002009);cellular_component:plasma membrane(GO:0005886);cellular_component:integral component of plasma membrane(GO:0005887);cellular_component:membrane(GO:0016020);cellular_component:integral component of membrane(GO:0016021);cellular_component:ba…
ENSDART00000059489	ENSDARG00000045760	4:11136198-11166762	0.358912	0.758507	1.07953	1.9389	0.00705	0.0215237	Ups	prmt8b	K11439	molecular_function:rRNA (adenine-N6,N6-)-dimethyltransferase activity(GO:0000179);molecular_function:protein C-terminal carboxyl O-methyltransferase activity(GO:0003880);molecular_function:tRNA (guanine-N2-)-methyltransferase activity(GO:0004809);cellular_component:cytosol(GO:0005829);cellular_component:plasma membrane(GO:0005886);cellular_component:plasma membrane(GO:0005886);cellular_component:…
ENSDART00000059954	ENSDARG00000040911	15:34570338-34600526	0.193438	0.909456	2.23313	3.15516	0.00135	0.00498667	Ups	meox2a	K09322	molecular_function:DNA binding(GO:0003677);cellular_component:nucleus(GO:0005634);biological_process:regulation of transcription, DNA-templated(GO:0006355);molecular_function:sequence-specific DNA binding(GO:0043565)
ENSDART00000059955	ENSDARG00000040910	9:34451418-34459881	3.23935	1.52489	-1.08699	-5.05477	5e-05	0.000238134	Down	ildr1b	_	cellular_component:membrane(GO:0016020);cellular_component:integral component of membrane(GO:0016021);biological_process:posterior lateral line development(GO:0048916);biological_process:posterior lateral line neuromast deposition(GO:0048922);biological_process:semicircular canal development(GO:0060872)
ENSDART00000060006	ENSDARG00000040946	9:32940681-32942789	11.1298	23.8098	1.09713	10.5797	5e-05	0.000238134	Ups	olig2	K09085	biological_process:neuron migration(GO:0001764);molecular_function:sequence-specific DNA binding transcription factor activity(GO:0003700);biological_process:regulation of transcription, DNA-templated(GO:0006355);biological_process:neuroblast fate determination(GO:0007400);biological_process:glial cell fate determination(GO:0007403);biological_process:oligodendrocyte development(GO:0014003);biolo…
ENSDART00000060245	ENSDARG00000041108	18:26437605-26444007	30.1956	8.34524	-1.85531	-14.5092	5e-05	0.000238134	Down	ctsh	K01366	molecular_function:aminopeptidase activity(GO:0004177);molecular_function:cysteine-type endopeptidase activity(GO:0004197);cellular_component:extracellular space(GO:0005615);cellular_component:lysosome(GO:0005764);biological_process:proteolysis(GO:0006508);biological_process:immune response(GO:0006955);molecular_function:peptidase activity(GO:0008233);molecular_function:cysteine-type peptidase ac…
ENSDART00000060361	ENSDARG00000041179	9:22533725-22555373	0.301854	1.36748	2.17959	2.35328	0.0114	0.0327974	Ups	crygm5	_	molecular_function:molecular_function(GO:0003674);cellular_component:cellular_component(GO:0005575);biological_process:biological_process(GO:0008150)
ENSDART00000060479	ENSDARG00000041257	14:16802349-16816060	10.4807	2.55429	-2.03674	-5.15415	5e-05	0.000238134	Down	smtnl1	_	molecular_function:molecular_function(GO:0003674);cellular_component:cellular_component(GO:0005575);biological_process:biological_process(GO:0008150)
ENSDART00000060594	ENSDARG00000041340	16:4570392-4811289	2.80039	15.6929	2.48641	5.91504	5e-05	0.000238134	Ups	mrpl51	K17432	molecular_function:structural constituent of ribosome(GO:0003735);molecular_function:structural constituent of ribosome(GO:0003735);molecular_function:structural constituent of ribosome(GO:0003735);cellular_component:mitochondrion(GO:0005739);cellular_component:mitochondrial large ribosomal subunit(GO:0005762);cellular_component:mitochondrial large ribosomal subunit(GO:0005762);cellular_component…
ENSDART00000060666	ENSDARG00000041382	16:5750313-5772236	0	1.37267	inf	-nan	5e-05	0.000238134	Ups	si:dkey-283b15.2	_	cellular_component:extracellular region(GO:0005576);molecular_function:metal ion binding(GO:0046872)
ENSDART00000060880	ENSDARG00000041530	8:47162237-47215933	1.81816	5.7105	1.65114	2.46038	0.00105	0.00398664	Ups	ppih	_	biological_process:protein peptidyl-prolyl isomerization(GO:0000413);biological_process:angiogenesis(GO:0001525);molecular_function:peptidyl-prolyl cis-trans isomerase activity(GO:0003755);molecular_function:peptidyl-prolyl cis-trans isomerase activity(GO:0003755);biological_process:protein folding(GO:0006457);molecular_function:isomerase activity(GO:0016853)
ENSDART00000060888	ENSDARG00000041533	22:26219526-26231706	5.22426	2.08196	-1.32728	-3.96571	5e-05	0.000238134	Down	ccdc130	K13115	_
ENSDART00000060946	ENSDARG00000075376	10:1610804-1647803	0.408791	0.831834	1.02493	3.07283	0.0001	0.000458341	Ups	sgsm1b	_	molecular_function:GTPase activator activity(GO:0005096);cellular_component:intracellular(GO:0005622);biological_process:intracellular protein transport(GO:0006886);cellular_component:endomembrane system(GO:0012505);molecular_function:Rab GTPase binding(GO:0017137);biological_process:regulation of vesicle fusion(GO:0031338);biological_process:activation of GTPase activity(GO:0090630)
ENSDART00000061168	ENSDARG00000041734	20:40869534-40943883	0.968302	2.18697	1.1754	4.56136	5e-05	0.000238134	Ups	tbc1d32	_	cellular_component:cytoplasm(GO:0005737);cellular_component:cilium(GO:0005929);biological_process:multicellular organismal development(GO:0007275);biological_process:axoneme assembly(GO:0035082);cellular_component:cell projection(GO:0042995)
ENSDART00000061173	ENSDARG00000041736	20:40864606-40869508	1.44446	3.22176	1.15732	2.5652	0.00215	0.00753956	Ups	hsdl1	_	cellular_component:mitochondrion(GO:0005739);cellular_component:mitochondrion(GO:0005739);molecular_function:steroid dehydrogenase activity(GO:0016229)
ENSDART00000061547	ENSDARG00000042861	17:31383620-31466506	0.262514	0.855151	1.70379	2.8302	0.00025	0.00107263	Ups	ltk	K05119	molecular_function:protein kinase activity(GO:0004672);molecular_function:protein tyrosine kinase activity(GO:0004713);molecular_function:transmembrane receptor protein tyrosine kinase activity(GO:0004714);molecular_function:ATP binding(GO:0005524);biological_process:protein phosphorylation(GO:0006468);biological_process:signal transduction(GO:0007165);biological_process:transmembrane receptor pr…
ENSDART00000061828	ENSDARG00000042180	15:7057956-7061417	1.68966	4.3011	1.34797	3.74574	5e-05	0.000238134	Ups	foxl2	K09405	molecular_function:sequence-specific DNA binding RNA polymerase II transcription factor activity(GO:0000981);molecular_function:DNA binding(GO:0003677);molecular_function:sequence-specific DNA binding transcription factor activity(GO:0003700);cellular_component:nucleus(GO:0005634);cellular_component:nucleus(GO:0005634);biological_process:regulation of transcription, DNA-templated(GO:0006355);biol…
ENSDART00000061829	ENSDARG00000042182	20:33616555-33627546	1.71393	0.65013	-1.39851	-4.05974	5e-05	0.000238134	Down	drc1	K19754	cellular_component:cytoplasm(GO:0005737);cellular_component:cytoskeleton(GO:0005856);cellular_component:cilium(GO:0005929);cellular_component:axoneme(GO:0005930);cellular_component:cell projection(GO:0042995);biological_process:cilium-dependent cell motility(GO:0060285);biological_process:axonemal dynein complex assembly(GO:0070286);biological_process:bacterial-type flagellum-dependent cell motil…
ENSDART00000062116	ENSDARG00000042357	3:49088238-49092400	2.34918	1.03736	-1.17924	-3.5746	5e-05	0.000238134	Down	cldnk	K06087	molecular_function:structural molecule activity(GO:0005198);cellular_component:plasma membrane(GO:0005886);cellular_component:bicellular tight junction(GO:0005923);biological_process:biological_process(GO:0008150);cellular_component:membrane(GO:0016020);cellular_component:integral component of membrane(GO:0016021);cellular_component:cell junction(GO:0030054)
ENSDART00000062370	ENSDARG00000042535	20:29574264-29580635	905.14	426.58	-1.08532	-55.3599	5e-05	0.000238134	Down	actc1a	K12314	molecular_function:nucleotide binding(GO:0000166);biological_process:endocardial cushion morphogenesis(GO:0003203);biological_process:endocardial cushion formation(GO:0003272);molecular_function:ATP binding(GO:0005524);biological_process:atrioventricular canal development(GO:0036302)
ENSDART00000062423	ENSDARG00000042559	18:6484982-6494059	56.1504	22.6912	-1.30717	-11.1313	5e-05	0.000238134	Down	tnni1c	_	biological_process:skeletal muscle contraction(GO:0003009);molecular_function:molecular_function(GO:0003674);cellular_component:troponin complex(GO:0005861);cellular_component:troponin complex(GO:0005861);biological_process:cardiac muscle contraction(GO:0060048)
ENSDART00000062507	ENSDARG00000042608	16:47283328-47309126	0.465538	1.51635	1.70363	3.16222	0.0002	0.000872038	Ups	ICA1	K19863	_
ENSDART00000062536	ENSDARG00000042630	20:30991213-30998155	21.3267	10.4543	-1.02856	-9.1091	5e-05	0.000238134	Down	hebp2	_	molecular_function:molecular_function(GO:0003674);biological_process:biological_process(GO:0008150)
ENSDART00000062551	ENSDARG00000042641	19:552153-657630	6.59109	2.62684	-1.32719	-7.44486	5e-05	0.000238134	Down	cyp51	K05917	biological_process:response to yeast(GO:0001878);molecular_function:monooxygenase activity(GO:0004497);molecular_function:iron ion binding(GO:0005506);cellular_component:endoplasmic reticulum(GO:0005783);cellular_component:plasma membrane(GO:0005886);molecular_function:methyltransferase activity(GO:0008168);molecular_function:sterol 14-demethylase activity(GO:0008398);cellular_component:membrane(…
ENSDART00000062628	ENSDARG00000042688	1:29919448-29930865	2.41358	0.938677	-1.36247	-3.27782	5e-05	0.000238134	Down	bora	K16831	cellular_component:cellular_component(GO:0005575);biological_process:cell cycle(GO:0007049);biological_process:mitotic nuclear division(GO:0007067);biological_process:regulation of mitotic nuclear division(GO:0007088);biological_process:regulation of protein localization(GO:0032880);biological_process:cell division(GO:0051301);biological_process:regulation of mitotic spindle organization(GO:00602…
ENSDART00000062681	ENSDARG00000012820	21:11866129-11888895	7.7803	3.55082	-1.13167	-2.58943	0.0019	0.00676523	Down	nop56	_	biological_process:rRNA modification(GO:0000154);biological_process:heart development(GO:0007507);molecular_function:snoRNA binding(GO:0030515);cellular_component:box C/D snoRNP complex(GO:0031428);cellular_component:small-subunit processome(GO:0032040)
ENSDART00000062687	ENSDARG00000012820	21:11866129-11888895	60.4118	29.8824	-1.01554	-9.17558	5e-05	0.000238134	Down	nop56	_	biological_process:rRNA modification(GO:0000154);biological_process:heart development(GO:0007507);molecular_function:snoRNA binding(GO:0030515);cellular_component:box C/D snoRNP complex(GO:0031428);cellular_component:small-subunit processome(GO:0032040)
ENSDART00000062898	ENSDARG00000042854	20:36725179-36941108	1.52222	0.539474	-1.49655	-2.87985	0.00015	0.000666878	Down	ephx1	K01253	molecular_function:catalytic activity(GO:0003824);molecular_function:cis-stilbene-oxide hydrolase activity(GO:0033961)
ENSDART00000062986	ENSDARG00000042908	22:15544922-15552019	0.828154	0.390185	-1.08574	-2.27519	0.00465	0.0149059	Down	hsh2d	_	cellular_component:cellular_component(GO:0005575)
ENSDART00000063107	ENSDARG00000042980	20:25669603-25674720	1.23303	0.362212	-1.7673	-3.61843	0.00015	0.000666878	Down	cyp2p7	K07418	molecular_function:monooxygenase activity(GO:0004497);molecular_function:iron ion binding(GO:0005506);molecular_function:arachidonic acid epoxygenase activity(GO:0008392);molecular_function:steroid hydroxylase activity(GO:0008395);molecular_function:oxidoreductase activity(GO:0016491);molecular_function:oxidoreductase activity, acting on paired donors, with incorporation or reduction of molecular…
ENSDART00000063272	ENSDARG00000043093	8:19325654-19329417	2.80319	0.206438	-3.76329	-7.39601	5e-05	0.000238134	Down	mpeg1.2	_	molecular_function:molecular_function(GO:0003674);cellular_component:membrane(GO:0016020);cellular_component:integral component of membrane(GO:0016021);biological_process:defense response to bacterium(GO:0042742)
ENSDART00000063438	ENSDARG00000053520	12:48552698-48563163	2.85902	1.15673	-1.30547	-4.63449	5e-05	0.000238134	Down	CABZ01079984.1	_	_
ENSDART00000063533	ENSDARG00000043279	22:2857784-2870671	29.2028	10.6814	-1.451	-10.0583	5e-05	0.000238134	Down	aqp12	K09871	molecular_function:transporter activity(GO:0005215);cellular_component:plasma membrane(GO:0005886);biological_process:transport(GO:0006810);molecular_function:water channel activity(GO:0015250);cellular_component:membrane(GO:0016020);cellular_component:integral component of membrane(GO:0016021);biological_process:cellular response to estrogen stimulus(GO:0071391)
ENSDART00000063572	ENSDARG00000043301	16:17344509-17345412	4.95656	10.3954	1.06853	4.65172	5e-05	0.000238134	Ups	gtf3c6	K15203	_
ENSDART00000063625	ENSDARG00000043342	14:50394422-50605663	0.789953	0.0748343	-3.4	-3.6865	5e-05	0.000238134	Down	gpx3	K00432	molecular_function:peroxidase activity(GO:0004601);molecular_function:glutathione peroxidase activity(GO:0004602);biological_process:response to oxidative stress(GO:0006979);molecular_function:oxidoreductase activity(GO:0016491);biological_process:oxidation-reduction process(GO:0055114)
ENSDART00000063725	ENSDARG00000043410	20:18901941-19015793	0.414762	0.915665	1.14254	2.69127	0.00085	0.00328059	Ups	xkr6b	_	cellular_component:membrane(GO:0016020);cellular_component:membrane(GO:0016020);cellular_component:integral component of membrane(GO:0016021)
ENSDART00000063777	ENSDARG00000043443	15:40370203-40420433	1.66711	0.291373	-2.51641	-2.78365	0.0134	0.0377575	Down	kcnj13	K05006	molecular_function:inward rectifier potassium channel activity(GO:0005242);molecular_function:inward rectifier potassium channel activity(GO:0005242);molecular_function:voltage-gated ion channel activity(GO:0005244);cellular_component:integral component of plasma membrane(GO:0005887);biological_process:transport(GO:0006810);biological_process:ion transport(GO:0006811);biological_process:potassium…
ENSDART00000063834	ENSDARG00000043482	8:13481062-13517646	23.5789	9.60721	-1.29531	-10.7483	5e-05	0.000238134	Down	zgc:86586	_	molecular_function:alpha-1,6-mannosyltransferase activity(GO:0000009);molecular_function:alpha-1,2-mannosyltransferase activity(GO:0000026);molecular_function:mannosyltransferase activity(GO:0000030);molecular_function:alpha-1,3-mannosyltransferase activity(GO:0000033);cellular_component:Golgi membrane(GO:0000139);molecular_function:alpha-1,3-galactosyltransferase activity(GO:0001962);molecular_f…
ENSDART00000063835	ENSDARG00000043483	15:47316334-47321752	4.14766	24.879	2.58456	17.4878	5e-05	0.000238134	Ups	otx5	K09326	molecular_function:DNA binding(GO:0003677);molecular_function:sequence-specific DNA binding transcription factor activity(GO:0003700);cellular_component:nucleus(GO:0005634);biological_process:regulation of transcription, DNA-templated(GO:0006355);biological_process:multicellular organismal development(GO:0007275);biological_process:circadian regulation of gene expression(GO:0032922);molecular_fun…
ENSDART00000063986	ENSDARG00000045959	16:3207374-3230290	0.954301	0.444924	-1.10089	-2.61102	0.0012	0.00449148	Down	csf3r	K05061	molecular_function:cytokine receptor activity(GO:0004896);cellular_component:membrane(GO:0016020);cellular_component:integral component of membrane(GO:0016021);biological_process:myeloid cell differentiation(GO:0030099);biological_process:neutrophil differentiation(GO:0030223);biological_process:monocyte differentiation(GO:0030224);biological_process:macrophage differentiation(GO:0030225);biologi…
ENSDART00000064061	ENSDARG00000076900	1:127249-596152	2.38602	0.539174	-2.14578	-3.06158	0.00015	0.000666878	Down	PROZ (1 of many)	_	molecular_function:serine-type endopeptidase activity(GO:0004252);molecular_function:calcium ion binding(GO:0005509);cellular_component:extracellular region(GO:0005576);biological_process:proteolysis(GO:0006508);biological_process:blood coagulation(GO:0007596)
ENSDART00000064219	ENSDARG00000043734	4:28349353-28364250	6.54075	2.26491	-1.53	-7.21173	5e-05	0.000238134	Down	trmu	K00566	molecular_function:tRNA binding(GO:0000049);molecular_function:nucleotide binding(GO:0000166);biological_process:tRNA wobble position uridine thiolation(GO:0002143);molecular_function:RNA binding(GO:0003723);molecular_function:ATP binding(GO:0005524);cellular_component:mitochondrion(GO:0005739);cellular_component:mitochondrion(GO:0005739);biological_process:tRNA processing(GO:0008033);molecular_f…
ENSDART00000064281	ENSDARG00000043770	7:3461400-3475830	0.814166	0.262488	-1.63307	-5.50303	5e-05	0.000238134	Down	si:dkey-192d15.2	_	molecular_function:protein kinase activity(GO:0004672);molecular_function:receptor signaling protein serine/threonine kinase activity(GO:0004702);molecular_function:ATP binding(GO:0005524);cellular_component:extracellular region(GO:0005576);cellular_component:cytoplasm(GO:0005737);biological_process:protein phosphorylation(GO:0006468);biological_process:lipid transport(GO:0006869);molecular_funct…
ENSDART00000064419	ENSDARG00000090722	20:1391366-1400179	11.6588	24.1953	1.05331	9.1168	5e-05	0.000238134	Ups	zgc:172246	_	biological_process:liver development(GO:0001889);cellular_component:extracellular region(GO:0005576);cellular_component:extracellular space(GO:0005615);biological_process:multicellular organismal development(GO:0007275);biological_process:digestive system development(GO:0055123);biological_process:embryonic liver development(GO:1990402)
ENSDART00000064447	ENSDARG00000019747	20:1251699-1255349	0.869722	0.284603	-1.61161	-2.15193	0.0119	0.0340382	Down	hsd3b2	_	molecular_function:3-beta-hydroxy-delta5-steroid dehydrogenase activity(GO:0003854);molecular_function:3-beta-hydroxy-delta5-steroid dehydrogenase activity(GO:0003854);biological_process:steroid biosynthetic process(GO:0006694);biological_process:steroid biosynthetic process(GO:0006694);molecular_function:oxidoreductase activity(GO:0016491);molecular_function:oxidoreductase activity, acting on th…
ENSDART00000064468	ENSDARG00000056742	1:13661819-13680618	2.59217	6.1932	1.25652	10.4494	5e-05	0.000238134	Ups	crmp1	_	biological_process:microtubule cytoskeleton organization(GO:0000226);cellular_component:cytoplasm(GO:0005737);biological_process:nervous system development(GO:0007399);biological_process:axon guidance(GO:0007411);molecular_function:hydrolase activity(GO:0016787);molecular_function:hydrolase activity, acting on carbon-nitrogen (but not peptide) bonds(GO:0016810)
ENSDART00000064666	ENSDARG00000044048	10:20671316-20675398	0.257323	0.697322	1.43824	2.67756	0.00345	0.0114276	Ups	prnpb	_	molecular_function:molecular_function(GO:0003674);cellular_component:plasma membrane(GO:0005886);biological_process:homophilic cell adhesion via plasma membrane adhesion molecules(GO:0007156);biological_process:central nervous system development(GO:0007417);cellular_component:cell surface(GO:0009986);cellular_component:membrane(GO:0016020);biological_process:calcium-independent cell-cell adhesion…
ENSDART00000064672	ENSDARG00000044053	17:6510239-6588816	4.5839	10.1067	1.14066	3.0265	5e-05	0.000238134	Ups	vsnl1b	K19936	molecular_function:calcium ion binding(GO:0005509);cellular_component:cellular_component(GO:0005575);molecular_function:metal ion binding(GO:0046872)
ENSDART00000064798	ENSDARG00000002192	22:10411308-10484661	3.56238	8.84861	1.31261	7.05775	5e-05	0.000238134	Ups	aspn	K08120	molecular_function:protein kinase inhibitor activity(GO:0004860);molecular_function:calcium ion binding(GO:0005509);molecular_function:collagen binding(GO:0005518);cellular_component:cytoplasm(GO:0005737);biological_process:cytokine-mediated signaling pathway(GO:0019221);biological_process:negative regulation of JAK-STAT cascade(GO:0046426)
ENSDART00000065101	ENSDARG00000044326	6:36486570-36492212	1.3229	0.395166	-1.74317	-5.20368	5e-05	0.000238134	Down	BX950188.1	_	_
ENSDART00000065138	ENSDARG00000044357	6:28923671-28952498	16.3608	7.85158	-1.05919	-8.10723	5e-05	0.000238134	Down	tbc1d23	_	_
ENSDART00000065139	ENSDARG00000044457	6:29013500-29016932	0.887101	1.77427	1.00005	2.23205	0.00455	0.0146196	Ups	gfi1ab	K09223	biological_process:negative regulation of transcription from RNA polymerase II promoter(GO:0000122);molecular_function:nucleic acid binding(GO:0003676);biological_process:regulation of transcription, DNA-templated(GO:0006355);biological_process:peripheral nervous system development(GO:0007422);biological_process:hemopoiesis(GO:0030097);biological_process:myeloid cell differentiation(GO:0030099);m…
ENSDART00000065159	ENSDARG00000044375	21:38264842-38267535	8.41191	22.2392	1.4026	14.678	5e-05	0.000238134	Ups	zgc:158291	K09366	molecular_function:DNA binding(GO:0003677);molecular_function:sequence-specific DNA binding transcription factor activity(GO:0003700);cellular_component:nucleus(GO:0005634);biological_process:transcription, DNA-templated(GO:0006351);biological_process:regulation of transcription, DNA-templated(GO:0006355);molecular_function:sequence-specific DNA binding(GO:0043565)
ENSDART00000065183	ENSDARG00000044387	21:37955172-37961801	0.387172	0.914382	1.23982	2.36736	0.0041	0.0133317	Ups	cldn2	K06087	molecular_function:structural molecule activity(GO:0005198);cellular_component:plasma membrane(GO:0005886);cellular_component:bicellular tight junction(GO:0005923);biological_process:biological_process(GO:0008150);cellular_component:membrane(GO:0016020);cellular_component:integral component of membrane(GO:0016021);cellular_component:cell junction(GO:0030054)
ENSDART00000065206	ENSDARG00000044400	6:30702324-30714293	0.770577	0.374866	-1.03957	-2.46845	0.0016	0.00580639	Down	wdr78	_	molecular_function:molecular_function(GO:0003674);cellular_component:cellular_component(GO:0005575);biological_process:biological_process(GO:0008150)
ENSDART00000065336	ENSDARG00000079272	24:36240789-36248321	5.14065	0.912054	-2.49476	-4.88991	5e-05	0.000238134	Down	tmem14cb	_	molecular_function:molecular_function(GO:0003674);biological_process:biological_process(GO:0008150);cellular_component:membrane(GO:0016020);cellular_component:integral component of membrane(GO:0016021)
ENSDART00000065435	ENSDARG00000007795	13:33238011-34433123	236.926	61.6405	-1.94249	-13.1491	5e-05	0.000238134	Down	cst3	K13899	molecular_function:protease binding(GO:0002020);molecular_function:cysteine-type endopeptidase inhibitor activity(GO:0004869);molecular_function:cysteine-type endopeptidase inhibitor activity(GO:0004869);cellular_component:extracellular space(GO:0005615);biological_process:negative regulation of peptidase activity(GO:0010466);molecular_function:peptidase inhibitor activity(GO:0030414);biological_…
ENSDART00000065659	ENSDARG00000044684	21:20286242-20306276	24.3073	10.3124	-1.23701	-9.38215	5e-05	0.000238134	Down	rbp4l	K18271	molecular_function:transporter activity(GO:0005215);molecular_function:retinoid binding(GO:0005501);cellular_component:extracellular region(GO:0005576);biological_process:transport(GO:0006810);molecular_function:small molecule binding(GO:0036094);biological_process:retina development in camera-type eye(GO:0060041)
ENSDART00000065674	ENSDARG00000044694	21:19807557-19829715	1.22063	0.408943	-1.57766	-3.922	5e-05	0.000238134	Down	si:ch211-147j13.3	K17698	biological_process:immune response(GO:0006955);biological_process:signal transduction(GO:0007165);cellular_component:actin cytoskeleton(GO:0015629)
ENSDART00000065858	ENSDARG00000044809	21:6008796-6029062	8.12524	3.64468	-1.15662	-5.05998	5e-05	0.000238134	Down	fpgs	K01930	molecular_function:tetrahydrofolylpolyglutamate synthase activity(GO:0004326);molecular_function:tetrahydrofolylpolyglutamate synthase activity(GO:0004326);molecular_function:ATP binding(GO:0005524);cellular_component:mitochondrial matrix(GO:0005759);biological_process:one-carbon metabolic process(GO:0006730);molecular_function:dihydrofolate synthase activity(GO:0008841);biological_process:biosyn…
ENSDART00000066050	ENSDARG00000044935	8:34797181-34807434	1.47411	7.47337	2.34192	8.83752	5e-05	0.000238134	Ups	hpdb	K00457	molecular_function:4-hydroxyphenylpyruvate dioxygenase activity(GO:0003868);cellular_component:cellular_component(GO:0005575);biological_process:aromatic amino acid family metabolic process(GO:0009072);molecular_function:oxidoreductase activity(GO:0016491);molecular_function:oxidoreductase activity, acting on single donors with incorporation of molecular oxygen(GO:0016701);molecular_function:meta…
ENSDART00000066177	ENSDARG00000045014	11:3268363-3275303	29.6787	65.4832	1.1417	24.2889	5e-05	0.000238134	Ups	tuba2	K07374	molecular_function:nucleotide binding(GO:0000166);molecular_function:GTPase activity(GO:0003924);molecular_function:structural constituent of cytoskeleton(GO:0005200);molecular_function:GTP binding(GO:0005525);cellular_component:cytoplasm(GO:0005737);cellular_component:cytoskeleton(GO:0005856);cellular_component:microtubule(GO:0005874);biological_process:microtubule-based process(GO:0007017)
ENSDART00000066383	ENSDARG00000045142	12:20220576-20231667	13.2388	2.86538	-2.20797	-5.0571	5e-05	0.000238134	Down	hbz	_	molecular_function:oxygen transporter activity(GO:0005344);molecular_function:iron ion binding(GO:0005506);cellular_component:hemoglobin complex(GO:0005833);biological_process:transport(GO:0006810);biological_process:oxygen transport(GO:0015671);molecular_function:oxygen binding(GO:0019825);molecular_function:heme binding(GO:0020037);molecular_function:metal ion binding(GO:0046872)
ENSDART00000066430	ENSDARG00000045180	12:16966954-16993856	3.31513	1.56204	-1.08563	-3.56484	5e-05	0.000238134	Down	acta2	K12313	molecular_function:nucleotide binding(GO:0000166);molecular_function:ATP binding(GO:0005524);cellular_component:cytoplasm(GO:0005737);biological_process:blood circulation(GO:0008015);biological_process:positive regulation of gene expression(GO:0010628);cellular_component:lamellipodium(GO:0030027);cellular_component:filopodium(GO:0030175);cellular_component:cell body(GO:0044297);biological_process…
ENSDART00000066506	ENSDARG00000045230	24:39718205-39722738	148.374	66.5128	-1.15753	-14.4664	5e-05	0.000238134	Down	cox6b1	K02267	molecular_function:cytochrome-c oxidase activity(GO:0004129);cellular_component:mitochondrion(GO:0005739)
ENSDART00000066556	ENSDARG00000045254	24:37810919-37820708	11.2976	5.25776	-1.10349	-5.77035	5e-05	0.000238134	Down	C7orf50	_	_
ENSDART00000066587	ENSDARG00000045275	24:35992232-36042293	1.56452	3.19191	1.0287	4.69215	5e-05	0.000238134	Ups	klhl14	K10451	molecular_function:ubiquitin-protein transferase activity(GO:0004842);cellular_component:endoplasmic reticulum(GO:0005783);cellular_component:Cul3-RING ubiquitin ligase complex(GO:0031463);cellular_component:neuron projection(GO:0043005);cellular_component:neuronal cell body(GO:0043025)
ENSDART00000066621	ENSDARG00000045299	21:1592356-1600152	20.3911	7.63516	-1.41721	-9.68048	5e-05	0.000238134	Down	vmo1b	_	_
ENSDART00000066625	ENSDARG00000045302	24:25326244-25352979	8.29093	3.26315	-1.34527	-8.93339	5e-05	0.000238134	Down	smpx	_	molecular_function:molecular_function(GO:0003674);cellular_component:muscle tendon junction(GO:0005927);biological_process:striated muscle contraction(GO:0006941);cellular_component:M band(GO:0031430);cellular_component:costamere(GO:0043034)
ENSDART00000066648	ENSDARG00000057927	24:24035654-24126497	0.630774	1.86787	1.5662	3.57446	5e-05	0.000238134	Ups	rps6ka3b	K04373	molecular_function:nucleotide binding(GO:0000166);molecular_function:magnesium ion binding(GO:0000287);molecular_function:protein kinase activity(GO:0004672);molecular_function:protein serine/threonine kinase activity(GO:0004674);molecular_function:protein serine/threonine kinase activity(GO:0004674);molecular_function:ATP binding(GO:0005524);cellular_component:nucleus(GO:0005634);cellular_compon…
ENSDART00000066781	ENSDARG00000045414	24:8720885-8747439	1.42698	0.440353	-1.69624	-5.43924	5e-05	0.000238134	Down	elovl2	K10205	cellular_component:endoplasmic reticulum(GO:0005783);cellular_component:endoplasmic reticulum membrane(GO:0005789);biological_process:lipid metabolic process(GO:0006629);biological_process:fatty acid metabolic process(GO:0006631);biological_process:fatty acid biosynthetic process(GO:0006633);molecular_function:fatty acid elongase activity(GO:0009922);molecular_function:fatty acid elongase activit…
ENSDART00000066964	ENSDARG00000045544	4:19721672-19753327	2.55188	1.26817	-1.00882	-4.90943	5e-05	0.000238134	Down	hgfa	K05460	biological_process:neuron migration(GO:0001764);molecular_function:serine-type endopeptidase activity(GO:0004252);cellular_component:extracellular space(GO:0005615);biological_process:proteolysis(GO:0006508);molecular_function:growth factor activity(GO:0008083);biological_process:positive regulation of cell proliferation(GO:0008284);biological_process:cerebellum development(GO:0021549);biological…
ENSDART00000066973	ENSDARG00000029524	4:18971899-18996505	2.09833	4.53526	1.11194	4.16334	5e-05	0.000238134	Ups	impdh1b	K00088	molecular_function:nucleotide binding(GO:0000166);molecular_function:catalytic activity(GO:0003824);molecular_function:IMP dehydrogenase activity(GO:0003938);molecular_function:IMP dehydrogenase activity(GO:0003938);cellular_component:nucleus(GO:0005634);cellular_component:cytoplasm(GO:0005737);cellular_component:cytoplasm(GO:0005737);biological_process:purine nucleotide biosynthetic process(GO:0…
ENSDART00000066999	ENSDARG00000045563	4:17666895-17673102	7.69596	3.79828	-1.01876	-6.74902	5e-05	0.000238134	Down	ccdc53	K18463	molecular_function:molecular_function(GO:0003674);biological_process:biological_process(GO:0008150);cellular_component:WASH complex(GO:0071203);cellular_component:WASH complex(GO:0071203)
ENSDART00000067001	ENSDARG00000045565	21:14709612-14729569	12.3926	4.66595	-1.40923	-4.58766	5e-05	0.000238134	Down	noc4l	K14771	biological_process:maturation of SSU-rRNA from tricistronic rRNA transcript (SSU-rRNA, 5.8S rRNA, LSU-rRNA)(GO:0000462);molecular_function:molecular_function(GO:0003674);cellular_component:nucleus(GO:0005634);cellular_component:nucleolus(GO:0005730);cellular_component:membrane(GO:0016020);cellular_component:integral component of membrane(GO:0016021);cellular_component:Noc4p-Nop14p complex(GO:0030…
ENSDART00000067004	ENSDARG00000045567	21:14709612-14729569	8.21294	16.9682	1.04687	4.36412	5e-05	0.000238134	Ups	phpt1	K01112	cellular_component:cytosol(GO:0005829);cellular_component:cytosol(GO:0005829);molecular_function:phosphohistidine phosphatase activity(GO:0008969);molecular_function:phosphohistidine phosphatase activity(GO:0008969);biological_process:peptidyl-histidine dephosphorylation(GO:0035971);biological_process:peptidyl-histidine dephosphorylation(GO:0035971)
ENSDART00000067164	ENSDARG00000045681	4:13587839-13615972	3.29047	0.926267	-1.82879	-4.09183	5e-05	0.000238134	Down	irf5	K09446	molecular_function:regulatory region DNA binding(GO:0000975);molecular_function:sequence-specific DNA binding transcription factor activity(GO:0003700);biological_process:regulation of transcription, DNA-templated(GO:0006355);biological_process:regulation of transcription from RNA polymerase II promoter(GO:0006357);biological_process:cytokine-mediated signaling pathway(GO:0019221);biological_proc…
ENSDART00000067177	ENSDARG00000045694	4:13964649-13996917	3.24092	1.40797	-1.20278	-2.48027	0.0003	0.00126972	Down	prickle1b	_	biological_process:neuron migration(GO:0001764);biological_process:neuron migration(GO:0001764);molecular_function:zinc ion binding(GO:0008270);biological_process:facial nucleus development(GO:0021754);biological_process:hindbrain tangential cell migration(GO:0021934);molecular_function:metal ion binding(GO:0046872)
ENSDART00000067309	ENSDARG00000045788	4:9206805-9213372	0.266196	0.567502	1.09214	3.00475	0.00025	0.00107263	Ups	avpr1ab	K04226	biological_process:regulation of systemic arterial blood pressure by vasopressin(GO:0001992);molecular_function:signal transducer activity(GO:0004871);molecular_function:G-protein coupled receptor activity(GO:0004930);molecular_function:vasopressin receptor activity(GO:0005000);molecular_function:vasopressin receptor activity(GO:0005000);cellular_component:integral component of plasma membrane(GO…
ENSDART00000067321	ENSDARG00000022045	25:19258632-19335293	0.343984	1.22024	1.82675	5.0207	5e-05	0.000238134	Ups	map1ab	K10429	biological_process:microtubule cytoskeleton organization(GO:0000226);cellular_component:microtubule(GO:0005874);biological_process:nervous system development(GO:0007399);molecular_function:microtubule binding(GO:0008017)
ENSDART00000067397	ENSDARG00000033134	20:3260118-3270588	10.4689	4.57045	-1.1957	-7.33713	5e-05	0.000238134	Down	ndufaf7	K18164	cellular_component:mitochondrion(GO:0005739);cellular_component:mitochondrion(GO:0005739);cellular_component:mitochondrion(GO:0005739);biological_process:mitochondrial respiratory chain complex I assembly(GO:0032981);biological_process:mitochondrial respiratory chain complex I assembly(GO:0032981);biological_process:chordate embryonic development(GO:0043009);biological_process:ATP metabolic proce…
ENSDART00000067510	ENSDARG00000045926	25:6179482-6209978	6.18161	27.1704	2.13598	9.96617	5e-05	0.000238134	Ups	crabp1a	K17337	molecular_function:retinoic acid binding(GO:0001972);molecular_function:transporter activity(GO:0005215);cellular_component:cytoplasm(GO:0005737);biological_process:transport(GO:0006810);molecular_function:lipid binding(GO:0008289);biological_process:retinoic acid catabolic process(GO:0034653)
ENSDART00000067593	ENSDARG00000045979	5:4041698-4052774	0.419725	2.44327	2.54129	3.33341	0.00145	0.00531371	Ups	zgc:153704	_	molecular_function:transporter activity(GO:0005215);cellular_component:extracellular region(GO:0005576);biological_process:lipid metabolic process(GO:0006629);biological_process:transport(GO:0006810);molecular_function:small molecule binding(GO:0036094)
ENSDART00000067594	ENSDARG00000045980	5:4081427-4091680	236.563	73.202	-1.69227	-44.5419	5e-05	0.000238134	Down	cst14b.1	_	molecular_function:endopeptidase inhibitor activity(GO:0004866);molecular_function:cysteine-type endopeptidase inhibitor activity(GO:0004869);cellular_component:intracellular(GO:0005622)
ENSDART00000067637	ENSDARG00000000853	22:435536-469215	2.67336	0.643687	-2.05422	-3.29584	5e-05	0.000238134	Down	dstyk	K16288	molecular_function:nucleotide binding(GO:0000166);molecular_function:protein kinase activity(GO:0004672);molecular_function:protein serine/threonine kinase activity(GO:0004674);molecular_function:protein serine/threonine kinase activity(GO:0004674);molecular_function:protein serine/threonine/tyrosine kinase activity(GO:0004712);molecular_function:protein tyrosine kinase activity(GO:0004713);molec…
ENSDART00000069132	ENSDARG00000056615	11:29547980-29569255	2.42355	0.845465	-1.51931	-6.07786	5e-05	0.000238134	Down	cybb	K08008	cellular_component:membrane(GO:0016020);cellular_component:integral component of membrane(GO:0016021);molecular_function:oxidoreductase activity(GO:0016491);biological_process:oxidation-reduction process(GO:0055114)
ENSDART00000073440	ENSDARG00000051762	25:33833849-33842488	14.9497	7.15057	-1.06399	-6.71152	5e-05	0.000238134	Down	DNAJA4	_	_
ENSDART00000073654	ENSDARG00000051939	7:60151877-60525938	39.0419	15.2775	-1.35361	-21.3592	5e-05	0.000238134	Down	pcxb	K01958	molecular_function:nucleotide binding(GO:0000166);molecular_function:DNA binding(GO:0003677);molecular_function:catalytic activity(GO:0003824);molecular_function:biotin carboxylase activity(GO:0004075);molecular_function:pyruvate carboxylase activity(GO:0004736);molecular_function:ATP binding(GO:0005524);biological_process:pyruvate metabolic process(GO:0006090);biological_process:gluconeogenesis(…
ENSDART00000073689	ENSDARG00000051965	1:44355125-44376396	5.34761	2.60247	-1.03901	-6.57923	5e-05	0.000238134	Down	btr01	_	biological_process:response to hypoxia(GO:0001666);cellular_component:intracellular(GO:0005622);molecular_function:zinc ion binding(GO:0008270);molecular_function:metal ion binding(GO:0046872)
ENSDART00000073712	ENSDARG00000051989	1:44098994-44099876	0.634373	2.2802	1.84576	2.75661	0.0032	0.0106982	Ups	tmem187	_	cellular_component:membrane(GO:0016020);cellular_component:integral component of membrane(GO:0016021)
ENSDART00000073957	ENSDARG00000011973	6:34863892-34877191	12.5903	6.12088	-1.0405	-8.90316	5e-05	0.000238134	Down	slc35d1a	K15281	molecular_function:pyrimidine nucleotide-sugar transmembrane transporter activity(GO:0015165);cellular_component:membrane(GO:0016020);cellular_component:integral component of membrane(GO:0016021)
ENSDART00000074036	ENSDARG00000052223	3:49406175-49408339	1.66329	3.66275	1.13889	2.70595	0.00045	0.00184244	Ups	rcvrna	K13764	molecular_function:calcium ion binding(GO:0005509);cellular_component:cellular_component(GO:0005575);biological_process:cone photoresponse recovery(GO:0036368);molecular_function:metal ion binding(GO:0046872)
ENSDART00000074070	ENSDARG00000052242	14:20045307-20439680	0.607495	1.23424	1.02268	6.59459	5e-05	0.000238134	Ups	aff2	K15194	_
ENSDART00000074261	ENSDARG00000052411	5:57021761-57045055	0.372429	0.880138	1.24076	2.60375	0.002	0.00708007	Ups	si:dkey-71l1.1	_	_
ENSDART00000074272	ENSDARG00000052417	3:58165893-58170734	0.989128	2.33165	1.23712	2.72965	0.0007	0.00274779	Ups	NATD1 (1 of many)	_	molecular_function:molecular_function(GO:0003674);cellular_component:cellular_component(GO:0005575);biological_process:biological_process(GO:0008150)
ENSDART00000074361	ENSDARG00000052497	18:12066266-12083414	2.74142	6.8649	1.32432	7.79287	5e-05	0.000238134	Ups	zgc:110789	K14611	molecular_function:transporter activity(GO:0005215);biological_process:transport(GO:0006810);cellular_component:membrane(GO:0016020);cellular_component:integral component of membrane(GO:0016021);biological_process:transmembrane transport(GO:0055085)
ENSDART00000074388	ENSDARG00000052520	1:49289825-49306817	0.235261	0.786724	1.7416	2.23335	0.00655	0.0201622	Ups	sgms2	K04714	cellular_component:integral component of plasma membrane(GO:0005887);biological_process:sphingomyelin biosynthetic process(GO:0006686);cellular_component:membrane(GO:0016020);cellular_component:integral component of membrane(GO:0016021);cellular_component:integral component of Golgi membrane(GO:0030173);cellular_component:integral component of endoplasmic reticulum membrane(GO:0030176);molecular_…
ENSDART00000074506	ENSDARG00000052615	14:40274292-40355440	0.623227	1.40054	1.16816	2.20025	0.0051	0.0161538	Ups	tnmd	_	molecular_function:molecular_function(GO:0003674);biological_process:biological_process(GO:0008150);cellular_component:membrane(GO:0016020);cellular_component:integral component of membrane(GO:0016021)
ENSDART00000074600	ENSDARG00000052700	1:42993868-43010956	0.847369	4.84248	2.51468	8.8306	5e-05	0.000238134	Ups	SLC9B2	_	biological_process:cation transport(GO:0006812);molecular_function:solute:proton antiporter activity(GO:0015299);cellular_component:membrane(GO:0016020);cellular_component:integral component of membrane(GO:0016021);biological_process:transmembrane transport(GO:0055085)
ENSDART00000074737	ENSDARG00000052816	3:40119070-40134213	48.6934	22.6421	-1.10472	-12.7647	5e-05	0.000238134	Down	shmt1	K00600	molecular_function:catalytic activity(GO:0003824);molecular_function:glycine hydroxymethyltransferase activity(GO:0004372);molecular_function:glycine hydroxymethyltransferase activity(GO:0004372);molecular_function:glycine hydroxymethyltransferase activity(GO:0004372);cellular_component:nucleus(GO:0005634);cellular_component:cytoplasm(GO:0005737);cellular_component:cytosol(GO:0005829);biological_…
ENSDART00000074833	ENSDARG00000052893	21:10663525-10666595	0.928042	2.12636	1.19612	3.01836	0.00025	0.00107263	Ups	rx3	K09332	biological_process:eye development(GO:0001654);biological_process:cell fate specification(GO:0001708);biological_process:neural crest cell migration(GO:0001755);molecular_function:DNA binding(GO:0003677);cellular_component:nucleus(GO:0005634);biological_process:transcription, DNA-templated(GO:0006351);biological_process:regulation of transcription, DNA-templated(GO:0006355);biological_process:mul…
ENSDART00000075159	ENSDARG00000053165	17:50366833-50411406	0.625966	1.46681	1.22852	2.39168	0.00155	0.00564705	Ups	zgc:113377	_	molecular_function:nucleic acid binding(GO:0003676);molecular_function:metal ion binding(GO:0046872)
ENSDART00000075303	ENSDARG00000011611	10:42693562-42712459	7.87693	1.61757	-2.28381	-2.46765	5e-05	0.000238134	Down	actr1	_	molecular_function:nucleotide binding(GO:0000166);molecular_function:ATP binding(GO:0005524);cellular_component:dynactin complex(GO:0005869);biological_process:biological_process(GO:0008150)
ENSDART00000075351	ENSDARG00000053323	12:34950572-34983740	1.67954	13.3741	2.99331	13.543	5e-05	0.000238134	Ups	zgc:112285	_	molecular_function:serine-type endopeptidase activity(GO:0004252);molecular_function:serine-type endopeptidase activity(GO:0004252);cellular_component:extracellular space(GO:0005615);biological_process:proteolysis(GO:0006508);molecular_function:peptidase activity(GO:0008233);molecular_function:serine-type peptidase activity(GO:0008236);molecular_function:hydrolase activity(GO:0016787)
ENSDART00000075392	ENSDARG00000053358	2:42874985-42899239	27.9799	59.3553	1.08499	20.6024	5e-05	0.000238134	Ups	basp1	K17272	molecular_function:transcription corepressor activity(GO:0003714);cellular_component:nucleus(GO:0005634);cellular_component:cytoplasm(GO:0005737);cellular_component:plasma membrane(GO:0005886);cellular_component:membrane(GO:0016020);molecular_function:transcription regulatory region DNA binding(GO:0044212);biological_process:negative regulation of transcription, DNA-templated(GO:0045892)
ENSDART00000075514	ENSDARG00000053481	17:44916641-44927048	0.268968	0.683048	1.34455	2.72423	0.0013	0.00482057	Ups	entpd5a	K01511	molecular_function:hydrolase activity(GO:0016787);biological_process:bone mineralization(GO:0030282);biological_process:phosphate ion homeostasis(GO:0055062)
ENSDART00000075673	ENSDARG00000053620	2:42087184-42093248	0.551524	1.39827	1.34215	2.124	0.01575	0.0434255	Ups	ebi3	_	molecular_function:cytokine receptor activity(GO:0004896);cellular_component:membrane(GO:0016020)
ENSDART00000075749	ENSDARG00000056797	1:13592827-13620325	1.4692	2.9624	1.01174	3.66078	5e-05	0.000238134	Ups	ppp2r2ca	K04354	cellular_component:protein phosphatase type 2A complex(GO:0000159);cellular_component:protein phosphatase type 2A complex(GO:0000159);biological_process:mitotic cell cycle(GO:0000278);molecular_function:protein serine/threonine phosphatase activity(GO:0004722);cellular_component:cytosol(GO:0005829);biological_process:developmental process(GO:0032502);biological_process:peptidyl-serine dephosphory…
ENSDART00000075902	ENSDARG00000053803	19:44195271-44223752	25.0972	11.9898	-1.06572	-12.0795	5e-05	0.000238134	Down	klhl43	_	molecular_function:ubiquitin-protein transferase activity(GO:0004842);cellular_component:Cul3-RING ubiquitin ligase complex(GO:0031463)
ENSDART00000075936	ENSDARG00000053829	17:38288883-38343480	0.164321	1.16179	2.82176	2.29618	0.00425	0.0137665	Ups	pax9	K09382	molecular_function:DNA binding(GO:0003677);molecular_function:sequence-specific DNA binding transcription factor activity(GO:0003700);cellular_component:nucleus(GO:0005634);biological_process:transcription, DNA-templated(GO:0006351);biological_process:regulation of transcription, DNA-templated(GO:0006355);biological_process:multicellular organismal development(GO:0007275);biological_process:organ…
ENSDART00000076012	ENSDARG00000095577	9:3519190-3563495	1.08658	3.03768	1.48318	2.11293	0.0174	0.0473345	Ups	cybrd1	K08370	molecular_function:ferric-chelate reductase activity(GO:0000293);biological_process:transport(GO:0006810);molecular_function:N-ethylmaleimide reductase activity(GO:0008748);biological_process:response to iron ion(GO:0010039);cellular_component:membrane(GO:0016020);cellular_component:integral component of membrane(GO:0016021);molecular_function:oxidoreductase activity(GO:0016491);molecular_functio…
ENSDART00000076077	ENSDARG00000053953	3:57920573-57921455	0.440786	1.36642	1.63225	2.03896	0.0108	0.0313158	Ups	MYADML2	_	_
ENSDART00000076082	ENSDARG00000053973	22:37934446-37944777	560.568	221.426	-1.34006	-58.5346	5e-05	0.000238134	Down	fetub	_	molecular_function:endopeptidase inhibitor activity(GO:0004866);molecular_function:cysteine-type endopeptidase inhibitor activity(GO:0004869);cellular_component:extracellular region(GO:0005576);cellular_component:extracellular space(GO:0005615)
ENSDART00000076200	ENSDARG00000054058	6:40764081-40902082	48.9296	23.8289	-1.03799	-7.37557	5e-05	0.000238134	Down	h1fx	K11275	cellular_component:nucleosome(GO:0000786);molecular_function:DNA binding(GO:0003677);cellular_component:nucleus(GO:0005634);cellular_component:chromosome(GO:0005694);biological_process:nucleosome assembly(GO:0006334)
ENSDART00000076502	ENSDARG00000054324	7:28134940-28142031	0.488396	1.32451	1.43933	3.87362	5e-05	0.000238134	Ups	rerglb	K17198	molecular_function:nucleotide binding(GO:0000166);molecular_function:GTP binding(GO:0005525);biological_process:signal transduction(GO:0007165);biological_process:small GTPase mediated signal transduction(GO:0007264);cellular_component:membrane(GO:0016020)
ENSDART00000076554	ENSDARG00000054363	18:49279005-49288109	2.24291	4.72879	1.07609	4.96481	5e-05	0.000238134	Ups	wu:fd14a06	_	cellular_component:membrane(GO:0016020);cellular_component:integral component of membrane(GO:0016021)
ENSDART00000076766	ENSDARG00000038056	1:21995221-22000443	4.67973	17.6336	1.91383	10.5908	5e-05	0.000238134	Ups	fgfbp2b	_	molecular_function:molecular_function(GO:0003674);cellular_component:cytoplasm(GO:0005737);biological_process:biological_process(GO:0008150)
ENSDART00000076925	ENSDARG00000054688	3:31109775-31111173	1.33054	0.623399	-1.09378	-2.20268	0.00285	0.00967895	Down	ITPRIPL2	_	_
ENSDART00000076955	ENSDARG00000004964	16:4570392-4811289	0.860835	0.280997	-1.61518	-2.55967	0.00365	0.0120112	Down	cyp4t8	K07426	molecular_function:monooxygenase activity(GO:0004497);molecular_function:iron ion binding(GO:0005506);cellular_component:membrane(GO:0016020);cellular_component:integral component of membrane(GO:0016021);molecular_function:oxidoreductase activity(GO:0016491);molecular_function:oxidoreductase activity, acting on paired donors, with incorporation or reduction of molecular oxygen(GO:0016705);molecul…
ENSDART00000076998	ENSDARG00000028148	13:29640386-29674090	3.37633	7.38601	1.12934	3.90245	5e-05	0.000238134	Ups	pax2a	K15608	biological_process:cell fate specification(GO:0001708);biological_process:cell fate specification(GO:0001708);biological_process:kidney development(GO:0001822);molecular_function:DNA binding(GO:0003677);molecular_function:DNA binding(GO:0003677);cellular_component:nucleus(GO:0005634);cellular_component:nucleus(GO:0005634);biological_process:transcription, DNA-templated(GO:0006351);biological_proc…
ENSDART00000077125	ENSDARG00000054864	18:44371075-44533486	24.3376	10.6151	-1.19707	-21.5278	5e-05	0.000238134	Down	aplp2	K08117	molecular_function:serine-type endopeptidase inhibitor activity(GO:0004867);molecular_function:heparin binding(GO:0008201);cellular_component:membrane(GO:0016020);cellular_component:integral component of membrane(GO:0016021);molecular_function:transition metal ion binding(GO:0046914)
ENSDART00000077187	ENSDARG00000024694	9:16189942-16301864	7.16304	3.18752	-1.16814	-5.51817	5e-05	0.000238134	Down	myo1b	_	molecular_function:nucleotide binding(GO:0000166);molecular_function:motor activity(GO:0003774);molecular_function:actin binding(GO:0003779);molecular_function:ATP binding(GO:0005524);cellular_component:myosin complex(GO:0016459)
ENSDART00000077216	ENSDARG00000068323	2:34589764-34999969	1.48178	3.76368	1.34481	5.78512	5e-05	0.000238134	Ups	astn1	_	cellular_component:membrane(GO:0016020);cellular_component:integral component of membrane(GO:0016021)
ENSDART00000077217	ENSDARG00000054934	7:24855471-24862696	0.894478	2.00581	1.16506	2.79997	0.00015	0.000666878	Ups	zgc:101765	_	cellular_component:cellular_component(GO:0005575);molecular_function:oxidoreductase activity(GO:0016491);biological_process:oxidation-reduction process(GO:0055114)
ENSDART00000077390	ENSDARG00000059060	1:54403145-54412336	0.514543	1.4679	1.51239	4.0222	5e-05	0.000238134	Ups	lgalsla	_	cellular_component:cellular_component(GO:0005575);biological_process:biological_process(GO:0008150);molecular_function:carbohydrate binding(GO:0030246)
ENSDART00000077635	ENSDARG00000077504	8:29709459-29710161	1.28494	4.14126	1.68837	3.27417	0.00035	0.00146175	Ups	si:ch211-103n10.5	_	cellular_component:nucleosome(GO:0000786);molecular_function:DNA binding(GO:0003677);cellular_component:nucleus(GO:0005634);cellular_component:chromosome(GO:0005694);biological_process:nucleosome assembly(GO:0006334)
ENSDART00000077660	ENSDARG00000055344	15:8216648-8333146	0.506377	1.65455	1.70815	3.91952	5e-05	0.000238134	Ups	mipep	K01410	molecular_function:metalloendopeptidase activity(GO:0004222);molecular_function:metalloendopeptidase activity(GO:0004222);cellular_component:mitochondrion(GO:0005739);biological_process:proteolysis(GO:0006508);biological_process:peptide metabolic process(GO:0006518);biological_process:protein processing involved in protein targeting to mitochondrion(GO:0006627);molecular_function:peptidase activi…
ENSDART00000077840	ENSDARG00000055527	12:13080236-13138615	57.2298	19.7106	-1.53779	-27.1142	5e-05	0.000238134	Down	cmn	_	cellular_component:extracellular matrix(GO:0031012)
ENSDART00000077853	ENSDARG00000055493	15:25745778-25755002	1.72187	3.65218	1.08478	4.92939	5e-05	0.000238134	Ups	hic1	_	biological_process:negative regulation of transcription from RNA polymerase II promoter(GO:0000122);molecular_function:nucleic acid binding(GO:0003676);molecular_function:DNA binding(GO:0003677);molecular_function:sequence-specific DNA binding transcription factor activity(GO:0003700);biological_process:intrinsic apoptotic signaling pathway in response to DNA damage(GO:0008630);molecular_function…
ENSDART00000077910	ENSDARG00000055539	21:28476361-28486959	18.6344	4.062	-2.1977	-9.00592	5e-05	0.000238134	Down	epdl2	_	molecular_function:calcium ion binding(GO:0005509);cellular_component:extracellular region(GO:0005576);biological_process:cell-matrix adhesion(GO:0007160)
ENSDART00000078197	ENSDARG00000055798	19:32966753-32973471	0.276857	1.30838	2.24057	3.48972	0.001	0.00381495	Ups	heyl	K09091	molecular_function:DNA binding(GO:0003677);cellular_component:nucleus(GO:0005634);biological_process:transcription, DNA-templated(GO:0006351);biological_process:regulation of transcription, DNA-templated(GO:0006355);biological_process:Notch signaling pathway(GO:0007219);biological_process:multicellular organismal development(GO:0007275);molecular_function:protein dimerization activity(GO:0046983)
ENSDART00000078232	ENSDARG00000055843	2:28906402-28950751	0.869727	2.30023	1.40314	5.13664	5e-05	0.000238134	Ups	cdh10a	K06802	molecular_function:calcium ion binding(GO:0005509);molecular_function:calcium ion binding(GO:0005509);cellular_component:plasma membrane(GO:0005886);biological_process:cell adhesion(GO:0007155);biological_process:cell adhesion(GO:0007155);biological_process:homophilic cell adhesion via plasma membrane adhesion molecules(GO:0007156);cellular_component:membrane(GO:0016020);cellular_component:integr…
ENSDART00000078266	ENSDARG00000055868	12:19262740-19272094	72.948	33.6241	-1.11737	-15.4616	5e-05	0.000238134	Down	rsl1d1	K14775	biological_process:maturation of LSU-rRNA(GO:0000470);molecular_function:RNA binding(GO:0003723);molecular_function:RNA binding(GO:0003723);biological_process:translation(GO:0006412);cellular_component:cytosolic large ribosomal subunit(GO:0022625);cellular_component:90S preribosome(GO:0030686)
ENSDART00000078369	ENSDARG00000055970	8:26413499-26430692	4.04488	2.01782	-1.0033	-4.73442	5e-05	0.000238134	Down	zgc:136971	K01303	biological_process:proteolysis(GO:0006508);molecular_function:serine-type peptidase activity(GO:0008236);cellular_component:membrane(GO:0016020);cellular_component:integral component of membrane(GO:0016021)
ENSDART00000078460	ENSDARG00000056080	13:21581833-21608692	0.515949	1.36731	1.40604	3.28844	0.00015	0.000666878	Ups	si:dkey-191g9.5	_	cellular_component:cytosol(GO:0005829);biological_process:small GTPase mediated signal transduction(GO:0007264);biological_process:positive regulation of GTPase activity(GO:0043547)
ENSDART00000078639	ENSDARG00000056196	2:26161208-26501150	4.43732	2.209	-1.0063	-3.19146	5e-05	0.000238134	Down	slc2a2	K07593	biological_process:liver development(GO:0001889);molecular_function:transporter activity(GO:0005215);biological_process:transport(GO:0006810);biological_process:brain development(GO:0007420);biological_process:carbohydrate transport(GO:0008643);biological_process:hexose transport(GO:0008645);biological_process:glucose transport(GO:0015758);cellular_component:membrane(GO:0016020);cellular_componen…
ENSDART00000078656	ENSDARG00000042807	8:24725901-24760750	8.32011	3.98902	-1.06057	-9.08222	5e-05	0.000238134	Down	slc16a4	K08181	cellular_component:integral component of plasma membrane(GO:0005887);molecular_function:lactate transmembrane transporter activity(GO:0015129);cellular_component:membrane(GO:0016020);cellular_component:integral component of membrane(GO:0016021);biological_process:plasma membrane lactate transport(GO:0035879);biological_process:transmembrane transport(GO:0055085)
ENSDART00000078672	ENSDARG00000056214	17:20154045-20187466	4.68332	1.92459	-1.28298	-1.69022	0.01645	0.045083	Down	gnrh3	K05252	molecular_function:hormone activity(GO:0005179);cellular_component:extracellular region(GO:0005576);biological_process:multicellular organismal development(GO:0007275);biological_process:brain development(GO:0007420);biological_process:camera-type eye development(GO:0043010)
ENSDART00000078763	ENSDARG00000056292	17:21043566-21046269	1.9452	14.5665	2.90467	9.06594	5e-05	0.000238134	Ups	vsx1	K09335	molecular_function:DNA binding(GO:0003677);molecular_function:chromatin binding(GO:0003682);cellular_component:nucleus(GO:0005634);cellular_component:nucleus(GO:0005634);biological_process:transcription, DNA-templated(GO:0006351);biological_process:regulation of transcription, DNA-templated(GO:0006355);biological_process:multicellular organismal development(GO:0007275);biological_process:visual p…
ENSDART00000078771	ENSDARG00000056294	24:37473368-37516746	2.50719	5.75658	1.19914	4.66281	5e-05	0.000238134	Ups	SBK1	K08858	molecular_function:protein kinase activity(GO:0004672);molecular_function:ATP binding(GO:0005524);biological_process:protein phosphorylation(GO:0006468)
ENSDART00000078860	ENSDARG00000056374	12:18323729-18332548	0.830066	0.323395	-1.35993	-2.61711	0.00135	0.00498667	Down	noxo1b	K17934	cellular_component:intracellular(GO:0005622);cellular_component:cytoplasm(GO:0005737);biological_process:superoxide metabolic process(GO:0006801);molecular_function:superoxide-generating NADPH oxidase activity(GO:0016175);molecular_function:superoxide-generating NADPH oxidase activator activity(GO:0016176);molecular_function:phosphatidylinositol binding(GO:0035091);molecular_function:phosphatidyl…
ENSDART00000078888	ENSDARG00000056396	18:30532975-30586434	8.14567	3.57767	-1.18701	-5.61566	5e-05	0.000238134	Down	dusp22a	K14165	molecular_function:phosphoprotein phosphatase activity(GO:0004721);molecular_function:protein tyrosine phosphatase activity(GO:0004725);cellular_component:nucleus(GO:0005634);cellular_component:cytoplasm(GO:0005737);biological_process:protein dephosphorylation(GO:0006470);biological_process:transforming growth factor beta receptor signaling pathway(GO:0007179);molecular_function:protein tyrosine/…
ENSDART00000078894	ENSDARG00000056407	18:30589690-30595595	1.77714	0.688282	-1.36849	-3.43828	5e-05	0.000238134	Down	irf8	K10155	molecular_function:regulatory region DNA binding(GO:0000975);biological_process:myeloid leukocyte differentiation(GO:0002573);molecular_function:sequence-specific DNA binding transcription factor activity(GO:0003700);biological_process:regulation of transcription, DNA-templated(GO:0006355);biological_process:microglia development(GO:0014005);biological_process:hemopoiesis(GO:0030097);biological_p…
ENSDART00000078921	ENSDARG00000077252	22:5796400-5809877	0.804956	0.193643	-2.05551	-2.53145	0.0161	0.0442588	Down	si:rp71-36a1.5	_	_
ENSDART00000079112	ENSDARG00000056590	7:27184127-27426041	3.48053	1.61304	-1.10953	-2.88843	0.0003	0.00126972	Down	calca	_	molecular_function:hormone activity(GO:0005179);cellular_component:extracellular region(GO:0005576);biological_process:calcium ion homeostasis(GO:0055074)
ENSDART00000079161	ENSDARG00000056630	21:22784213-22796110	0.684007	2.43558	1.83218	3.74915	0.00015	0.000666878	Ups	angptl5	_	_
ENSDART00000079265	ENSDARG00000009822	23:21535469-21544507	19.8423	8.3134	-1.25507	-5.53741	5e-05	0.000238134	Down	her4.4	_	molecular_function:DNA binding(GO:0003677);cellular_component:nucleus(GO:0005634);biological_process:transcription, DNA-templated(GO:0006351);biological_process:regulation of transcription, DNA-templated(GO:0006355);molecular_function:protein dimerization activity(GO:0046983);biological_process:peripheral nervous system neuron axonogenesis(GO:0048936)
ENSDART00000079347	ENSDARG00000056795	7:25994390-25998821	5.2625	2.33396	-1.17297	-5.37417	5e-05	0.000238134	Down	serpine1	K03982	molecular_function:serine-type endopeptidase inhibitor activity(GO:0004867);cellular_component:extracellular space(GO:0005615);cellular_component:extracellular space(GO:0005615);biological_process:negative regulation of plasminogen activation(GO:0010757)
ENSDART00000079523	ENSDARG00000056950	4:16326715-16345101	82.6617	38.598	-1.09869	-12.802	5e-05	0.000238134	Down	epyc	_	cellular_component:proteinaceous extracellular matrix(GO:0005578);cellular_component:extracellular space(GO:0005615);biological_process:axonogenesis(GO:0007409);molecular_function:heparin binding(GO:0008201);biological_process:Roundabout signaling pathway(GO:0035385);molecular_function:Roundabout binding(GO:0048495);biological_process:axon extension involved in axon guidance(GO:0048846);biologica…
ENSDART00000079556	ENSDARG00000056979	22:23228024-23238701	8.90805	18.3026	1.03887	6.08892	5e-05	0.000238134	Ups	lhx9	_	molecular_function:DNA binding(GO:0003677);molecular_function:transcription corepressor activity(GO:0003714);cellular_component:nucleus(GO:0005634);biological_process:regulation of transcription, DNA-templated(GO:0006355);biological_process:motor neuron axon guidance(GO:0008045);molecular_function:zinc ion binding(GO:0008270);biological_process:thalamus development(GO:0021794);molecular_function:…
ENSDART00000079566	ENSDARG00000057004	10:24717447-24720273	1.94184	0.719748	-1.43186	-3.13359	0.00015	0.000666878	Down	si:ch211-287a12.9	_	biological_process:liver development(GO:0001889)
ENSDART00000079709	ENSDARG00000057113	21:20706239-20896022	12.2768	4.95467	-1.30907	-10.1573	5e-05	0.000238134	Down	c6	K03995	cellular_component:membrane attack complex(GO:0005579);biological_process:immune response(GO:0006955)
ENSDART00000079784	ENSDARG00000079572	12:15580313-15622276	0.865473	2.19493	1.34261	4.4608	5e-05	0.000238134	Ups	plcd3b	K05857	biological_process:angiogenesis(GO:0001525);molecular_function:phosphatidylinositol phospholipase C activity(GO:0004435);molecular_function:signal transducer activity(GO:0004871);molecular_function:calcium ion binding(GO:0005509);biological_process:lipid metabolic process(GO:0006629);biological_process:signal transduction(GO:0007165);molecular_function:phosphoric diester hydrolase activity(GO:000…
ENSDART00000080029	ENSDARG00000017023	17:18858081-18869123	0.381776	0.910831	1.25446	2.76893	0.0006	0.00238787	Ups	ak7b	K00939	molecular_function:ATP binding(GO:0005524);cellular_component:cellular_component(GO:0005575);biological_process:nucleobase-containing compound metabolic process(GO:0006139);molecular_function:kinase activity(GO:0016301);biological_process:phosphorylation(GO:0016310);molecular_function:transferase activity(GO:0016740);molecular_function:nucleobase-containing compound kinase activity(GO:0019205)
ENSDART00000080110	ENSDARG00000057435	21:19381960-19404981	0.858431	2.93383	1.77301	4.63289	5e-05	0.000238134	Ups	amacr	K01796	molecular_function:catalytic activity(GO:0003824);cellular_component:cellular_component(GO:0005575)
ENSDART00000080143	ENSDARG00000057678	10:20394031-20399632	4.36375	1.88864	-1.20822	-4.57239	5e-05	0.000238134	Down	sfrp1b	_	molecular_function:G-protein coupled receptor activity(GO:0004930);cellular_component:extracellular region(GO:0005576);biological_process:multicellular organismal development(GO:0007275);cellular_component:integral component of membrane(GO:0016021);biological_process:Wnt signaling pathway(GO:0016055);molecular_function:Wnt-protein binding(GO:0017147);biological_process:non-canonical Wnt signaling…
ENSDART00000080306	ENSDARG00000057598	22:13822358-13826520	3.38695	8.28247	1.29008	5.74114	5e-05	0.000238134	Ups	s100b	_	molecular_function:calcium ion binding(GO:0005509);molecular_function:zinc ion binding(GO:0008270);molecular_function:metal ion binding(GO:0046872)
ENSDART00000080328	ENSDARG00000012982	15:30959651-31186924	4.1318	2.01314	-1.03732	-1.76053	0.00055	0.00220876	Down	nf1a	K08052	biological_process:blood vessel development(GO:0001568);biological_process:blood vessel development(GO:0001568);molecular_function:GTPase activator activity(GO:0005096);molecular_function:GTPase activator activity(GO:0005096);cellular_component:cytoplasm(GO:0005737);biological_process:signal transduction(GO:0007165);biological_process:heart development(GO:0007507);biological_process:memory(GO:000…
ENSDART00000080449	ENSDARG00000013871	10:17177666-17201797	0.663843	0.246364	-1.43005	-2.64334	0.0018	0.00644912	Down	slc5a1	K14158	molecular_function:transporter activity(GO:0005215);molecular_function:glucose:sodium symporter activity(GO:0005412);cellular_component:integral component of plasma membrane(GO:0005887);biological_process:transport(GO:0006810);cellular_component:membrane(GO:0016020);cellular_component:integral component of membrane(GO:0016021);biological_process:transmembrane transport(GO:0055085)
ENSDART00000080632	ENSDARG00000070705	19:24539185-24541234	1.23971	0.613511	-1.01484	-2.11591	0.0052	0.0164289	Down	zgc:64022	_	molecular_function:nucleotide binding(GO:0000166);molecular_function:GTP binding(GO:0005525);biological_process:signal transduction(GO:0007165);biological_process:small GTPase mediated signal transduction(GO:0007264);cellular_component:membrane(GO:0016020)
ENSDART00000080772	ENSDARG00000057992	10:9134643-9143264	0.535157	1.92689	1.84824	2.5374	0.0027	0.00922623	Ups	fstb	_	cellular_component:cellular_component(GO:0005575);biological_process:biological_process(GO:0008150)
ENSDART00000080807	ENSDARG00000058020	3:13290787-13311243	1.15149	2.34575	1.02655	2.30448	0.0092	0.0272062	Ups	fbxw9	K10265	_
ENSDART00000080875	ENSDARG00000058100	8:13592786-13603317	3.02639	1.36398	-1.14978	-3.52558	0.0001	0.000458341	Down	b3gnt3	K07970	molecular_function:alpha-1,6-mannosyltransferase activity(GO:0000009);molecular_function:alpha-1,2-mannosyltransferase activity(GO:0000026);molecular_function:mannosyltransferase activity(GO:0000030);molecular_function:alpha-1,3-mannosyltransferase activity(GO:0000033);cellular_component:Golgi membrane(GO:0000139);molecular_function:alpha-1,3-galactosyltransferase activity(GO:0001962);molecular_f…
ENSDART00000080927	ENSDARG00000058117	17:12143917-12231242	9.86437	20.5319	1.05757	9.15845	5e-05	0.000238134	Ups	snap25b	K18211	molecular_function:SNAP receptor activity(GO:0005484);cellular_component:cytoplasm(GO:0005737);cellular_component:plasma membrane(GO:0005886);cellular_component:plasma membrane(GO:0005886);cellular_component:membrane(GO:0016020);cellular_component:membrane(GO:0016020);biological_process:synaptic vesicle priming(GO:0016082);molecular_function:syntaxin-1 binding(GO:0017075);cellular_component:cell …
ENSDART00000081098	ENSDARG00000058256	11:15796552-15878479	5.31413	2.40309	-1.14494	-2.40557	0.0034	0.0112763	Down	draxin	_	cellular_component:extracellular region(GO:0005576);cellular_component:extracellular region(GO:0005576);cellular_component:extracellular region(GO:0005576);biological_process:multicellular organismal development(GO:0007275);biological_process:axon guidance(GO:0007411);biological_process:axon guidance(GO:0007411);biological_process:axon guidance(GO:0007411);biological_process:central nervous syste…
ENSDART00000081228	ENSDARG00000058367	22:10668866-10677191	1.97797	4.01278	1.02058	3.63671	5e-05	0.000238134	Ups	abhd14a	K13706	molecular_function:GPI-anchor transamidase activity(GO:0003923);cellular_component:cytoplasm(GO:0005737);cellular_component:cytoplasm(GO:0005737);cellular_component:membrane(GO:0016020);cellular_component:integral component of membrane(GO:0016021);molecular_function:hydrolase activity(GO:0016787);molecular_function:hydrolase activity(GO:0016787);molecular_function:coenzyme F390-A hydrolase activi…
ENSDART00000081418	ENSDARG00000058548	16:7745314-7762634	6.77417	1.34194	-2.33572	-5.03697	5e-05	0.000238134	Down	bves	_	molecular_function:nucleotide binding(GO:0000166);biological_process:positive regulation of receptor recycling(GO:0001921);biological_process:response to ischemia(GO:0002931);molecular_function:structural molecule activity(GO:0005198);cellular_component:plasma membrane(GO:0005886);cellular_component:caveola(GO:0005901);cellular_component:bicellular tight junction(GO:0005923);cellular_component:bi…
ENSDART00000081550	ENSDARG00000058656	9:7537472-7560935	173.944	49.5997	-1.81022	-26.2261	5e-05	0.000238134	Down	desma	K07610	molecular_function:structural molecule activity(GO:0005198);cellular_component:intermediate filament(GO:0005882);biological_process:muscle contraction(GO:0006936);biological_process:skeletal muscle tissue development(GO:0007519);biological_process:locomotory behavior(GO:0007626);cellular_component:Z disc(GO:0030018);biological_process:myofibril assembly(GO:0030239);biological_process:sarcomere or…
ENSDART00000081553	ENSDARG00000058656	9:7537472-7560935	97.772	42.5832	-1.19914	-15.2849	5e-05	0.000238134	Down	desma	K07610	molecular_function:structural molecule activity(GO:0005198);cellular_component:intermediate filament(GO:0005882);biological_process:muscle contraction(GO:0006936);biological_process:skeletal muscle tissue development(GO:0007519);biological_process:locomotory behavior(GO:0007626);cellular_component:Z disc(GO:0030018);biological_process:myofibril assembly(GO:0030239);biological_process:sarcomere or…
ENSDART00000081657	ENSDARG00000058731	8:12816820-12829697	0.799457	0.14647	-2.44842	-3.70141	0.0023	0.00800308	Down	slc2a6	K08144	molecular_function:transporter activity(GO:0005215);molecular_function:sugar:proton symporter activity(GO:0005351);cellular_component:integral component of plasma membrane(GO:0005887);biological_process:transport(GO:0006810);cellular_component:membrane(GO:0016020);cellular_component:integral component of membrane(GO:0016021);molecular_function:transmembrane transporter activity(GO:0022857);molecu…
ENSDART00000081703	ENSDARG00000058771	6:54871402-55012866	0.994176	2.03489	1.03338	3.83901	5e-05	0.000238134	Ups	nav1b	_	_
ENSDART00000081779	ENSDARG00000058830	19:1356989-1366871	3.36882	1.35121	-1.31799	-7.05006	5e-05	0.000238134	Down	zdhhc3b	K20029	molecular_function:zinc ion binding(GO:0008270);cellular_component:membrane(GO:0016020);cellular_component:integral component of membrane(GO:0016021);molecular_function:transferase activity(GO:0016740);molecular_function:transferase activity, transferring acyl groups(GO:0016746);molecular_function:protein-cysteine S-palmitoyltransferase activity(GO:0019706)
ENSDART00000081791	ENSDARG00000091624	5:8872335-8933732	0.296558	0.885752	1.57859	2.43182	0.0036	0.0118616	Ups	si:ch73-240m12.1	K00699	biological_process:metabolic process(GO:0008152);biological_process:flavonoid biosynthetic process(GO:0009813);molecular_function:glucuronosyltransferase activity(GO:0015020);molecular_function:glucuronosyltransferase activity(GO:0015020);cellular_component:membrane(GO:0016020);cellular_component:integral component of membrane(GO:0016021);molecular_function:transferase activity(GO:0016740);molecu…
ENSDART00000081794	ENSDARG00000075054	10:3081321-3142059	0.0994741	0.558142	2.48824	5.6515	5e-05	0.000238134	Ups	RASGRF2 (1 of many)	K12326	_
ENSDART00000081870	ENSDARG00000091043	14:2200810-2349164	0.192494	0.779623	2.01796	2.8007	0.0015	0.0054753	Ups	pcdh2ab6	K16493	molecular_function:calcium ion binding(GO:0005509);cellular_component:plasma membrane(GO:0005886);biological_process:cell adhesion(GO:0007155);biological_process:homophilic cell adhesion via plasma membrane adhesion molecules(GO:0007156);cellular_component:membrane(GO:0016020);cellular_component:integral component of membrane(GO:0016021)
ENSDART00000081940	ENSDARG00000058960	15:1740257-1746563	0.226767	0.598905	1.40112	2.41529	0.0078	0.0235236	Ups	otol1b	_	cellular_component:extracellular region(GO:0005576);cellular_component:collagen trimer(GO:0005581)
ENSDART00000081961	ENSDARG00000058978	23:1024547-1047688	0.916874	1.94803	1.08722	2.35324	0.00545	0.017134	Ups	zgc:113423	_	molecular_function:molecular_function(GO:0003674);cellular_component:cellular_component(GO:0005575);biological_process:skeletal muscle fiber development(GO:0048741)
ENSDART00000081985	ENSDARG00000059001	8:8889284-8895484	33.1165	8.26242	-2.00292	-21.9356	5e-05	0.000238134	Down	pim2	K04702	molecular_function:nucleotide binding(GO:0000166);molecular_function:protein kinase activity(GO:0004672);molecular_function:protein serine/threonine kinase activity(GO:0004674);molecular_function:protein serine/threonine kinase activity(GO:0004674);molecular_function:protein serine/threonine kinase activity(GO:0004674);molecular_function:ATP binding(GO:0005524);molecular_function:ATP binding(GO:0…
ENSDART00000081993	ENSDARG00000058999	21:43984305-43996788	0.357231	1.81937	2.34851	4.81159	5e-05	0.000238134	Ups	cdx1b	K09312	molecular_function:RNA polymerase II regulatory region sequence-specific DNA binding(GO:0000977);biological_process:endoderm formation(GO:0001706);biological_process:liver development(GO:0001889);molecular_function:DNA binding(GO:0003677);molecular_function:sequence-specific DNA binding transcription factor activity(GO:0003700);cellular_component:nucleus(GO:0005634);cellular_component:nucleus(GO:…
ENSDART00000082034	ENSDARG00000059039	22:5328959-5344278	2.52907	0	-inf	-nan	5e-05	0.000238134	Down	mhc1ula	_	_
ENSDART00000082085	ENSDARG00000059073	17:19323178-19325685	4.28217	9.62881	1.16902	5.91868	5e-05	0.000238134	Ups	gsc	K09324	molecular_function:DNA binding(GO:0003677);cellular_component:nucleus(GO:0005634);biological_process:regulation of transcription, DNA-templated(GO:0006355);biological_process:multicellular organismal development(GO:0007275);biological_process:brain development(GO:0007420);biological_process:anterior/posterior axis specification(GO:0009948);biological_process:dorsal/ventral axis specification(GO:0…
ENSDART00000082154	ENSDARG00000071241	23:6934654-7160016	1.42532	0.691027	-1.04447	-2.30282	0.00345	0.0114276	Down	trim35-39	_	cellular_component:intracellular(GO:0005622);molecular_function:zinc ion binding(GO:0008270);molecular_function:metal ion binding(GO:0046872)
ENSDART00000082169	ENSDARG00000059139	12:798372-802502	0.262553	0.639844	1.28511	2.30373	0.00315	0.0105605	Ups	wfikkn2b	_	molecular_function:serine-type endopeptidase inhibitor activity(GO:0004867)
ENSDART00000082250	ENSDARG00000055192	2:32796919-32807669	41.9859	163.898	1.96482	35.5981	5e-05	0.000238134	Ups	zgc:136930	_	molecular_function:structural molecule activity(GO:0005198);cellular_component:intermediate filament(GO:0005882);biological_process:biological_process(GO:0008150)
ENSDART00000082842	ENSDARG00000059534	7:56476256-56492328	4.05729	8.21729	1.01815	9.693	5e-05	0.000238134	Ups	JPH3 (1 of many)	K19530	cellular_component:membrane(GO:0016020);cellular_component:integral component of membrane(GO:0016021)
ENSDART00000083010	ENSDARG00000055620	11:26448365-26463995	4.01969	8.63089	1.10242	7.7575	5e-05	0.000238134	Ups	acad9	K15980	molecular_function:fatty-acyl-CoA binding(GO:0000062);molecular_function:acyl-CoA dehydrogenase activity(GO:0003995);molecular_function:acyl-CoA dehydrogenase activity(GO:0003995);cellular_component:mitochondrion(GO:0005739);biological_process:metabolic process(GO:0008152);molecular_function:electron carrier activity(GO:0009055);molecular_function:oxidoreductase activity(GO:0016491);molecular_fun…
ENSDART00000083389	ENSDARG00000059751	7:48999884-49046965	0.634852	1.33384	1.07109	4.1016	5e-05	0.000238134	Ups	BX511065.1	_	_
ENSDART00000083395	ENSDARG00000059746	8:47861080-47906825	11.8622	0.146273	-6.34157	-3.39353	0.012	0.0342833	Down	plod1a	K00473	molecular_function:iron ion binding(GO:0005506);cellular_component:collagen trimer(GO:0005581);cellular_component:endoplasmic reticulum(GO:0005783);molecular_function:procollagen-lysine 5-dioxygenase activity(GO:0008475);molecular_function:oxidoreductase activity(GO:0016491);molecular_function:oxidoreductase activity, acting on paired donors, with incorporation or reduction of molecular oxygen(GO…
ENSDART00000083416	ENSDARG00000059763	8:53026461-53483663	0.550234	1.10492	1.00582	3.04868	5e-05	0.000238134	Ups	gabrd	K05184	molecular_function:GABA-A receptor activity(GO:0004890);molecular_function:GABA-A receptor activity(GO:0004890);molecular_function:extracellular ligand-gated ion channel activity(GO:0005230);cellular_component:plasma membrane(GO:0005886);biological_process:transport(GO:0006810);biological_process:ion transport(GO:0006811);cellular_component:membrane(GO:0016020);cellular_component:integral compone…
ENSDART00000083421	ENSDARG00000058285	18:8388900-8409547	1.61276	4.33674	1.42708	7.39003	5e-05	0.000238134	Ups	cpt1b	_	biological_process:response to bacterium(GO:0009617);cellular_component:membrane(GO:0016020);cellular_component:integral component of membrane(GO:0016021);molecular_function:transferase activity(GO:0016740);molecular_function:transferase activity, transferring acyl groups(GO:0016746)
ENSDART00000083731	ENSDARG00000059883	5:41536205-41558403	0.298299	0.671897	1.17148	1.91787	0.0122	0.034758	Ups	trpv1	K05222	molecular_function:ion channel activity(GO:0005216);molecular_function:calcium channel activity(GO:0005262);cellular_component:intracellular(GO:0005622);cellular_component:plasma membrane(GO:0005886);cellular_component:integral component of plasma membrane(GO:0005887);biological_process:transport(GO:0006810);biological_process:ion transport(GO:0006811);biological_process:response to heat(GO:00094…
ENSDART00000084119	ENSDARG00000060018	14:50147506-50149278	6.65954	14.8574	1.15768	7.59896	5e-05	0.000238134	Ups	si:ch1073-44g3.1	_	_
ENSDART00000084389	ENSDARG00000060115	6:43078979-43094639	157.356	72.6203	-1.11559	-41.3378	5e-05	0.000238134	Down	lrrn1	_	molecular_function:protein binding(GO:0005515);biological_process:axonogenesis(GO:0007409);cellular_component:membrane(GO:0016020);cellular_component:integral component of membrane(GO:0016021);biological_process:olfactory nerve formation(GO:0021628);biological_process:olfactory placode morphogenesis(GO:0071699)
ENSDART00000084803	ENSDARG00000006849	3:37682409-38484082	0.365051	1.18863	1.70313	3.32332	5e-05	0.000238134	Ups	asic2	_	molecular_function:sodium channel activity(GO:0005272);cellular_component:plasma membrane(GO:0005886);biological_process:transport(GO:0006810);biological_process:ion transport(GO:0006811);biological_process:sodium ion transport(GO:0006814);molecular_function:ligand-gated sodium channel activity(GO:0015280);cellular_component:membrane(GO:0016020);cellular_component:integral component of membrane(G…
ENSDART00000084890	ENSDARG00000060330	5:37467531-37494337	0.757321	1.83876	1.27976	3.92281	5e-05	0.000238134	Ups	si:ch211-284e13.4	_	molecular_function:signal transducer activity(GO:0004871);molecular_function:insulin receptor binding(GO:0005158);molecular_function:insulin receptor binding(GO:0005158);cellular_component:cytosol(GO:0005829);cellular_component:plasma membrane(GO:0005886);biological_process:insulin receptor signaling pathway(GO:0008286);biological_process:regulation of lipid metabolic process(GO:0019216);molecula…
ENSDART00000084938	ENSDARG00000060345	2:37225003-37233532	10.4993	22.4931	1.09919	6.56552	5e-05	0.000238134	Ups	apoda.1	_	molecular_function:transporter activity(GO:0005215);biological_process:transport(GO:0006810);molecular_function:lipid binding(GO:0008289)
ENSDART00000084958	ENSDARG00000060354	2:37244553-37260080	0.625845	4.81242	2.94288	4.50901	5e-05	0.000238134	Ups	samd7	_	_
ENSDART00000085228	ENSDARG00000060469	16:36767345-36794550	0.879191	2.45332	1.48049	4.28478	5e-05	0.000238134	Ups	pik3r4	K08333	molecular_function:protein kinase activity(GO:0004672);molecular_function:protein serine/threonine kinase activity(GO:0004674);molecular_function:ATP binding(GO:0005524);cellular_component:nuclear pore(GO:0005643);cellular_component:late endosome(GO:0005770);biological_process:protein phosphorylation(GO:0006468);biological_process:protein targeting to vacuole(GO:0006623);biological_process:macroa…
ENSDART00000085251	ENSDARG00000060471	25:33793259-33794653	0.327893	1.34488	2.03617	3.04439	0.00205	0.00724013	Ups	gcnt3	K09662	molecular_function:acetylglucosaminyltransferase activity(GO:0008375);cellular_component:membrane(GO:0016020);cellular_component:integral component of membrane(GO:0016021)
ENSDART00000085277	ENSDARG00000060797	6:39742180-39767459	72.9785	31.3574	-1.21866	-26.4846	5e-05	0.000238134	Down	pfkmb	K00850	molecular_function:nucleotide binding(GO:0000166);molecular_function:catalytic activity(GO:0003824);molecular_function:6-phosphofructokinase activity(GO:0003872);molecular_function:ATP binding(GO:0005524);cellular_component:cytoplasm(GO:0005737);biological_process:fructose 6-phosphate metabolic process(GO:0006002);biological_process:glycolytic process(GO:0006096);biological_process:metabolic proc…
ENSDART00000085522	ENSDARG00000077236	15:37657984-37831782	2.36249	5.17114	1.13018	4.62621	5e-05	0.000238134	Ups	hspb6	_	_
ENSDART00000085693	ENSDARG00000001676	9:55161687-55250696	34.2865	12.6004	-1.44416	-7.77086	5e-05	0.000238134	Down	gpm6bb	_	cellular_component:membrane(GO:0016020);cellular_component:integral component of membrane(GO:0016021)
ENSDART00000085763	ENSDARG00000060682	9:45790759-45802530	416.603	205.194	-1.02168	-23.5745	5e-05	0.000238134	Down	agr1	_	molecular_function:dystroglycan binding(GO:0002162);cellular_component:endoplasmic reticulum(GO:0005783);biological_process:cell differentiation(GO:0030154);biological_process:fin regeneration(GO:0031101);biological_process:negative regulation of cell death(GO:0060548)
ENSDART00000085969	ENSDARG00000068480	5:23457362-23495977	1.67146	4.26498	1.35142	6.31846	5e-05	0.000238134	Ups	map7d2a	_	biological_process:microtubule cytoskeleton organization(GO:0000226);biological_process:microtubule cytoskeleton organization(GO:0000226);molecular_function:structural molecule activity(GO:0005198);cellular_component:microtubule cytoskeleton(GO:0015630);cellular_component:microtubule cytoskeleton(GO:0015630)
ENSDART00000086104	ENSDARG00000087574	14:40977920-41020938	4.30743	0.352345	-3.61177	-4.54775	5e-05	0.000238134	Down	nox1	_	cellular_component:membrane(GO:0016020);cellular_component:integral component of membrane(GO:0016021);molecular_function:superoxide-generating NADPH oxidase activity(GO:0016175);molecular_function:oxidoreductase activity(GO:0016491);biological_process:superoxide anion generation(GO:0042554);biological_process:oxidation-reduction process(GO:0055114)
ENSDART00000086143	ENSDARG00000060845	13:31166479-31205507	1.39736	0.686095	-1.02622	-2.22609	0.00485	0.0154608	Down	antxr1d	_	molecular_function:receptor activity(GO:0004872);cellular_component:membrane(GO:0016020);cellular_component:integral component of membrane(GO:0016021)
ENSDART00000086389	ENSDARG00000060941	12:32177661-32259449	0.883773	0.342801	-1.3663	-1.90716	0.01205	0.0344057	Down	ANKFN1	_	_
ENSDART00000086516	ENSDARG00000061000	11:37765909-37816192	0.550508	1.50491	1.45084	3.15568	5e-05	0.000238134	Ups	klhdc8a	_	_
ENSDART00000086720	ENSDARG00000061099	11:23466552-23646948	0.738647	0.229172	-1.68845	-2.87931	5e-05	0.000238134	Down	nfasca	K06757	cellular_component:membrane(GO:0016020);cellular_component:integral component of membrane(GO:0016021)
ENSDART00000086954	ENSDARG00000015822	15:35185037-35234766	24.7815	10.3183	-1.26406	-17.7934	5e-05	0.000238134	Down	sesn3	K10141	molecular_function:molecular_function(GO:0003674);cellular_component:nucleus(GO:0005634);biological_process:locomotory behavior(GO:0007626);biological_process:regulation of response to reactive oxygen species(GO:1901031)
ENSDART00000087298	ENSDARG00000061301	7:23778618-23933508	2.43053	6.10382	1.32844	2.51924	5e-05	0.000238134	Ups	gmpr2	K00364	molecular_function:catalytic activity(GO:0003824);molecular_function:GMP reductase activity(GO:0003920);molecular_function:GMP reductase activity(GO:0003920);cellular_component:cytoplasm(GO:0005737);biological_process:purine nucleobase metabolic process(GO:0006144);biological_process:nucleotide metabolic process(GO:0009117);biological_process:purine ribonucleotide interconversion(GO:0015951);mole…
ENSDART00000087346	ENSDARG00000040118	16:38409969-38439851	77.1697	31.9554	-1.27197	-24.2419	5e-05	0.000238134	Down	zgc:113232	_	molecular_function:molecular_function(GO:0003674)
ENSDART00000087368	ENSDARG00000061335	16:26989971-27227033	1.56643	3.69522	1.23818	2.04407	0.00185	0.00660521	Ups	galnt1	K00710	molecular_function:alpha-1,6-mannosyltransferase activity(GO:0000009);molecular_function:alpha-1,2-mannosyltransferase activity(GO:0000026);molecular_function:mannosyltransferase activity(GO:0000030);molecular_function:alpha-1,3-mannosyltransferase activity(GO:0000033);cellular_component:Golgi membrane(GO:0000139);molecular_function:alpha-1,3-galactosyltransferase activity(GO:0001962);molecular_f…
ENSDART00000087410	ENSDARG00000061348	25:34306079-34328524	0.371308	1.49432	2.00881	3.56788	0.00015	0.000666878	Ups	adat1	K15440	molecular_function:RNA binding(GO:0003723);molecular_function:adenosine deaminase activity(GO:0004000);cellular_component:cellular_component(GO:0005575);biological_process:RNA processing(GO:0006396)
ENSDART00000087421	ENSDARG00000061351	19:41260988-41267986	2.56104	1.04801	-1.28908	-3.83336	5e-05	0.000238134	Down	tfpi2	_	molecular_function:serine-type endopeptidase inhibitor activity(GO:0004867);biological_process:central nervous system development(GO:0007417);biological_process:heart development(GO:0007507);biological_process:sarcomere organization(GO:0045214);biological_process:regulation of hemopoiesis(GO:1903706)
ENSDART00000087586	ENSDARG00000061416	25:32400711-32402688	1.45411	0.588721	-1.30448	-2.93507	0.00015	0.000666878	Down	zgc:162595	_	molecular_function:calcium ion binding(GO:0005509);molecular_function:calcium-dependent phospholipid binding(GO:0005544);cellular_component:plasma membrane(GO:0005886);biological_process:vesicle fusion(GO:0006906);biological_process:regulation of calcium ion-dependent exocytosis(GO:0017158);molecular_function:syntaxin binding(GO:0019905);molecular_function:clathrin binding(GO:0030276);biological_…
ENSDART00000088199	ENSDARG00000061664	9:12433917-12453591	4.20348	9.5548	1.18464	5.50007	5e-05	0.000238134	Ups	zgc:162707	_	molecular_function:molecular_function(GO:0003674);cellular_component:cellular_component(GO:0005575);biological_process:biological_process(GO:0008150)
ENSDART00000088618	ENSDARG00000061818	19:31596181-31610467	0.945316	1.90605	1.01172	1.85791	0.0182	0.0492358	Ups	meox2b	_	molecular_function:DNA binding(GO:0003677);cellular_component:nucleus(GO:0005634);biological_process:regulation of transcription, DNA-templated(GO:0006355);molecular_function:sequence-specific DNA binding(GO:0043565)
ENSDART00000088624	ENSDARG00000057074	11:29523791-29543048	0.659744	1.53636	1.21954	2.6545	0.0027	0.00922623	Ups	rpgrb	K19607	biological_process:microtubule-based movement(GO:0007018);biological_process:visual perception(GO:0007601);biological_process:retina layer formation(GO:0010842);biological_process:retinal rod cell development(GO:0046548);biological_process:retinal rod cell development(GO:0046548);biological_process:retina development in camera-type eye(GO:0060041);biological_process:epithelial cilium movement inv…
ENSDART00000088827	ENSDARG00000027750	5:28559757-28577119	28.6331	13.3011	-1.10613	-7.45434	5e-05	0.000238134	Down	dpp7	K01276	molecular_function:serine-type carboxypeptidase activity(GO:0004185);biological_process:proteolysis(GO:0006508);molecular_function:serine-type peptidase activity(GO:0008236);molecular_function:dipeptidyl-peptidase activity(GO:0008239);cellular_component:vesicle(GO:0031982)
ENSDART00000088833	ENSDARG00000061909	14:2464272-2482033	0.480718	1.9958	2.0537	8.42984	5e-05	0.000238134	Ups	si:ch73-233f7.1	K16499	molecular_function:calcium ion binding(GO:0005509);cellular_component:plasma membrane(GO:0005886);biological_process:cell adhesion(GO:0007155);biological_process:homophilic cell adhesion via plasma membrane adhesion molecules(GO:0007156);cellular_component:membrane(GO:0016020);cellular_component:integral component of membrane(GO:0016021)
ENSDART00000088949	ENSDARG00000061952	1:18869814-18906338	4.47556	10.9424	1.28979	12.5878	5e-05	0.000238134	Ups	si:dkey-245p14.7	K11886	_
ENSDART00000089480	ENSDARG00000062132	1:17207368-17219708	3.54712	9.21094	1.3767	8.11313	5e-05	0.000238134	Ups	cyp4v8	K07427	molecular_function:monooxygenase activity(GO:0004497);molecular_function:iron ion binding(GO:0005506);cellular_component:membrane(GO:0016020);cellular_component:integral component of membrane(GO:0016021);molecular_function:oxidoreductase activity(GO:0016491);molecular_function:oxidoreductase activity, acting on paired donors, with incorporation or reduction of molecular oxygen(GO:0016705);molecul…
ENSDART00000089748	ENSDARG00000033498	5:24766523-24806654	8.73386	17.7307	1.02156	8.3447	5e-05	0.000238134	Ups	rorb	K08533	molecular_function:DNA binding(GO:0003677);molecular_function:sequence-specific DNA binding transcription factor activity(GO:0003700);molecular_function:steroid hormone receptor activity(GO:0003707);molecular_function:ligand-activated sequence-specific DNA binding RNA polymerase II transcription factor activity(GO:0004879);cellular_component:nucleus(GO:0005634);biological_process:transcription, D…
ENSDART00000090025	ENSDARG00000062341	1:13627137-13653114	6.21774	1.59808	-1.96006	-11.6637	5e-05	0.000238134	Down	wfs1a	_	molecular_function:molecular_function(GO:0003674);cellular_component:endoplasmic reticulum(GO:0005783);cellular_component:membrane(GO:0016020);cellular_component:integral component of membrane(GO:0016021);biological_process:calcium ion homeostasis(GO:0055074)
ENSDART00000090235	ENSDARG00000061836	3:14618563-14908664	0.505662	1.91216	1.91896	3.86622	0.0003	0.00126972	Ups	nfixb	K09171	biological_process:negative regulation of transcription from RNA polymerase II promoter(GO:0000122);molecular_function:sequence-specific DNA binding RNA polymerase II transcription factor activity(GO:0000981);molecular_function:DNA binding(GO:0003677);molecular_function:sequence-specific DNA binding transcription factor activity(GO:0003700);cellular_component:intracellular(GO:0005622);cellular_co…
ENSDART00000090237	ENSDARG00000062420	22:16813196-17026111	2.67007	7.6541	1.51936	8.27428	5e-05	0.000238134	Ups	nfia	K09168	biological_process:negative regulation of transcription from RNA polymerase II promoter(GO:0000122);molecular_function:sequence-specific DNA binding RNA polymerase II transcription factor activity(GO:0000981);molecular_function:DNA binding(GO:0003677);molecular_function:sequence-specific DNA binding transcription factor activity(GO:0003700);cellular_component:intracellular(GO:0005622);cellular_co…
ENSDART00000090242	ENSDARG00000062420	22:16813196-17026111	1.23869	2.65203	1.09828	3.41106	5e-05	0.000238134	Ups	nfia	K09168	biological_process:negative regulation of transcription from RNA polymerase II promoter(GO:0000122);molecular_function:sequence-specific DNA binding RNA polymerase II transcription factor activity(GO:0000981);molecular_function:DNA binding(GO:0003677);molecular_function:sequence-specific DNA binding transcription factor activity(GO:0003700);cellular_component:intracellular(GO:0005622);cellular_co…
ENSDART00000090280	ENSDARG00000062423	9:24393310-24402015	2.27744	0.742306	-1.61733	-2.92442	0.00055	0.00220876	Down	zgc:153901	_	molecular_function:folic acid binding(GO:0005542);cellular_component:cellular_component(GO:0005575);biological_process:metabolic process(GO:0008152);molecular_function:transferase activity(GO:0016740)
ENSDART00000090375	ENSDARG00000062463	5:21593415-21602992	7.87401	3.6848	-1.09551	-4.14615	5e-05	0.000238134	Down	zc3h12b	K18668	molecular_function:metal ion binding(GO:0046872)
ENSDART00000090427	ENSDARG00000062487	8:14092044-14113506	5.67993	2.32515	-1.28855	-7.15723	5e-05	0.000238134	Down	si:dkey-6n6.1	_	cellular_component:proteinaceous extracellular matrix(GO:0005578);cellular_component:extracellular space(GO:0005615);biological_process:axonogenesis(GO:0007409)
ENSDART00000090447	ENSDARG00000062501	17:17894532-18005855	3.58462	1.09081	-1.71642	-5.52082	5e-05	0.000238134	Down	hhipl1	_	molecular_function:catalytic activity(GO:0003824);molecular_function:scavenger receptor activity(GO:0005044);cellular_component:cytoplasm(GO:0005737);biological_process:carbohydrate metabolic process(GO:0005975);cellular_component:membrane(GO:0016020);cellular_component:integral component of membrane(GO:0016021);molecular_function:oxidoreductase activity, acting on the CH-OH group of donors, quin…
ENSDART00000090464	ENSDARG00000062502	19:22733676-22743831	0.952563	0.324187	-1.55499	-2.88554	0.0005	0.00202494	Down	si:ch73-196l6.5	_	cellular_component:integral component of plasma membrane(GO:0005887);cellular_component:membrane(GO:0016020);cellular_component:integral component of membrane(GO:0016021);molecular_function:riboflavin transporter activity(GO:0032217);biological_process:riboflavin transport(GO:0032218)
ENSDART00000090475	ENSDARG00000062532	13:17942169-17991350	3.98768	1.76608	-1.175	-4.3243	5e-05	0.000238134	Down	fam21c	K18462	molecular_function:molecular_function(GO:0003674);biological_process:biological_process(GO:0008150);cellular_component:WASH complex(GO:0071203)
ENSDART00000090684	ENSDARG00000062579	5:15651371-15774817	8.02624	3.9362	-1.02792	-6.93298	5e-05	0.000238134	Down	kremen1	_	biological_process:angiogenesis(GO:0001525);biological_process:liver development(GO:0001889);biological_process:cell communication(GO:0007154);cellular_component:membrane(GO:0016020);cellular_component:membrane(GO:0016020);cellular_component:integral component of membrane(GO:0016021);biological_process:neuromast development(GO:0048884);biological_process:posterior lateral line development(GO:0048…
ENSDART00000090711	ENSDARG00000062598	14:16064409-16074190	0.297483	0.651896	1.13183	2.2041	0.0077	0.023266	Ups	ltc4s	K00807	molecular_function:glutathione transferase activity(GO:0004364);molecular_function:leukotriene-C4 synthase activity(GO:0004464);molecular_function:glutathione peroxidase activity(GO:0004602);cellular_component:nuclear envelope(GO:0005635);cellular_component:endoplasmic reticulum(GO:0005783);biological_process:leukotriene metabolic process(GO:0006691);molecular_function:enzyme activator activity(G…
ENSDART00000090748	ENSDARG00000057519	10:21693446-21886346	0.333839	1.02094	1.61267	2.30682	0.0021	0.00738585	Ups	pcdh1g9	_	molecular_function:calcium ion binding(GO:0005509);cellular_component:plasma membrane(GO:0005886);biological_process:cell adhesion(GO:0007155);biological_process:homophilic cell adhesion via plasma membrane adhesion molecules(GO:0007156);cellular_component:membrane(GO:0016020);cellular_component:integral component of membrane(GO:0016021)
ENSDART00000090844	ENSDARG00000060977	14:46352693-46359266	32.0466	14.9976	-1.09544	-20.5371	5e-05	0.000238134	Down	zgc:153018	_	molecular_function:molecular_function(GO:0003674);biological_process:biological_process(GO:0008150);cellular_component:membrane(GO:0016020);cellular_component:integral component of membrane(GO:0016021)
ENSDART00000090883	ENSDARG00000062688	19:20664346-20685855	5.9418	14.0831	1.245	13.4944	5e-05	0.000238134	Ups	gpnmb	K20732	molecular_function:integrin binding(GO:0005178);cellular_component:integral component of plasma membrane(GO:0005887);biological_process:cell adhesion(GO:0007155);cellular_component:membrane(GO:0016020);cellular_component:integral component of membrane(GO:0016021)
ENSDART00000091013	ENSDARG00000093318	9:22193072-22193964	0	2.89933	inf	-nan	5e-05	0.000238134	Ups	si:dkey-57a22.15	_	_
ENSDART00000091021	ENSDARG00000054753	17:15534143-15538929	0.970951	20.4631	4.39748	19.1474	5e-05	0.000238134	Ups	col10a1a	K19479	cellular_component:extracellular region(GO:0005576);cellular_component:collagen trimer(GO:0005581)
ENSDART00000091124	ENSDARG00000062780	5:12137605-12173342	1.11995	0.379996	-1.55938	-3.01711	0.00145	0.00531371	Down	AIFM3	_	_
ENSDART00000091132	ENSDARG00000062781	25:19387246-19423294	2.12069	1.03485	-1.03512	-2.65273	0.00115	0.00432461	Down	glsl	_	molecular_function:glutaminase activity(GO:0004359);molecular_function:glutaminase activity(GO:0004359);cellular_component:mitochondrial matrix(GO:0005759);biological_process:glutamate biosynthetic process(GO:0006537);biological_process:glutamine metabolic process(GO:0006541);biological_process:glutamine catabolic process(GO:0006543)
ENSDART00000091331	ENSDARG00000086746	21:5781883-5816502	18.8462	6.69906	-1.49225	-15.0346	5e-05	0.000238134	Down	si:ch73-209e20.3	K00318	molecular_function:proline dehydrogenase activity(GO:0004657);cellular_component:cellular_component(GO:0005575);biological_process:proline catabolic process(GO:0006562)
ENSDART00000091597	ENSDARG00000062974	10:9052209-9108717	1.91048	0.908267	-1.07275	-3.85157	5e-05	0.000238134	Down	itga2.2	_	biological_process:cell adhesion(GO:0007155);biological_process:integrin-mediated signaling pathway(GO:0007229);cellular_component:integrin complex(GO:0008305);cellular_component:membrane(GO:0016020);cellular_component:integral component of membrane(GO:0016021)
ENSDART00000092116	ENSDARG00000063191	2:7251630-7260085	3.72413	1.76432	-1.07779	-3.8264	5e-05	0.000238134	Down	extl2	K02369	biological_process:glycosaminoglycan biosynthetic process(GO:0006024);biological_process:heparan sulfate proteoglycan biosynthetic process(GO:0015012);cellular_component:membrane(GO:0016020);cellular_component:integral component of membrane(GO:0016021)
ENSDART00000092580	ENSDARG00000052091	7:61770293-61896771	6.64832	3.29416	-1.01308	-6.85237	5e-05	0.000238134	Down	rbpjb	K06053	molecular_function:RNA polymerase II core promoter proximal region sequence-specific DNA binding(GO:0000978);molecular_function:RNA polymerase II core promoter proximal region sequence-specific DNA binding transcription factor activity(GO:0000982);biological_process:somitogenesis(GO:0001756);biological_process:somitogenesis(GO:0001756);biological_process:sprouting angiogenesis(GO:0002040);biologi…
ENSDART00000092687	ENSDARG00000063435	12:4340965-4497181	0.684749	2.08025	1.60311	2.51734	0.0021	0.00738585	Ups	trpm4b.2	_	biological_process:regulation of T cell cytokine production(GO:0002724);molecular_function:ion channel activity(GO:0005216);molecular_function:calcium activated cation channel activity(GO:0005227);biological_process:ion transport(GO:0006811);biological_process:cation transport(GO:0006812);cellular_component:membrane(GO:0016020);cellular_component:integral component of membrane(GO:0016021);biologi…
ENSDART00000092903	ENSDARG00000063527	11:32006-110423	1.88276	4.54897	1.27269	2.19314	0.0092	0.0272062	Ups	elmo2	_	biological_process:cytoskeleton organization(GO:0007010);biological_process:cell migration(GO:0016477);biological_process:cell-cell adhesion(GO:0098609)
ENSDART00000092942	ENSDARG00000063539	15:3267526-3294981	1.07449	0.28449	-1.9172	-3.08508	0.0016	0.00580639	Down	slc25a15a	K15101	biological_process:transport(GO:0006810);cellular_component:membrane(GO:0016020);cellular_component:integral component of membrane(GO:0016021)
ENSDART00000093061	ENSDARG00000063594	23:36693825-36743183	0.411489	1.1976	1.54122	4.46284	5e-05	0.000238134	Ups	hipk1a	K08826	molecular_function:protein kinase activity(GO:0004672);molecular_function:ATP binding(GO:0005524);biological_process:protein phosphorylation(GO:0006468)
ENSDART00000093310	ENSDARG00000071375	22:19640638-19986626	2.06967	4.14348	1.00144	3.59463	5e-05	0.000238134	Ups	celf5a	K13207	molecular_function:nucleotide binding(GO:0000166);molecular_function:nucleic acid binding(GO:0003676)
ENSDART00000097254	ENSDARG00000067566	5:68074380-68105544	1.36948	0.490085	-1.48253	-3.19603	5e-05	0.000238134	Down	sftpbb	_	molecular_function:G-protein coupled receptor binding(GO:0001664);cellular_component:extracellular space(GO:0005615);cellular_component:cytoplasm(GO:0005737);cellular_component:lysosome(GO:0005764);biological_process:lipid metabolic process(GO:0006629);biological_process:sphingolipid metabolic process(GO:0006665);molecular_function:enzyme activator activity(GO:0008047);molecular_function:metal io…
ENSDART00000097364	ENSDARG00000078004	5:60930941-60967534	1.85334	0.673157	-1.46111	-2.93175	0.00045	0.00184244	Down	drl	_	biological_process:gastrulation with mouth forming second(GO:0001702);molecular_function:nucleic acid binding(GO:0003676);molecular_function:DNA binding(GO:0003677);biological_process:multicellular organismal development(GO:0007275);molecular_function:zinc ion binding(GO:0008270);molecular_function:metal ion binding(GO:0046872)
ENSDART00000097471	ENSDARG00000067672	5:50510223-50519640	1.47475	0.579694	-1.34711	-3.4983	0.0001	0.000458341	Down	card9	K12794	biological_process:regulation of apoptotic process(GO:0042981)
ENSDART00000097543	ENSDARG00000067727	20:4221953-4286363	2.40997	7.83108	1.70019	15.4475	5e-05	0.000238134	Ups	BCL11B (1 of many)	_	molecular_function:molecular_function(GO:0003674);cellular_component:cellular_component(GO:0005575);biological_process:biological_process(GO:0008150)
ENSDART00000097670	ENSDARG00000067805	10:7744531-7764757	6.81345	3.08994	-1.14081	-4.59571	5e-05	0.000238134	Down	ggcx	_	molecular_function:gamma-glutamyl carboxylase activity(GO:0008488);cellular_component:membrane(GO:0016020);cellular_component:integral component of membrane(GO:0016021);biological_process:peptidyl-glutamic acid carboxylation(GO:0017187)
ENSDART00000097738	ENSDARG00000014910	5:37240760-37252355	2.42655	4.88222	1.00863	6.09424	5e-05	0.000238134	Ups	panx1b	K03443	cellular_component:plasma membrane(GO:0005886);cellular_component:gap junction(GO:0005921);biological_process:cation transport(GO:0006812);biological_process:cell-cell signaling(GO:0007267);cellular_component:endomembrane system(GO:0012505);molecular_function:channel activity(GO:0015267);cellular_component:membrane(GO:0016020);cellular_component:integral component of membrane(GO:0016021);molecula…
ENSDART00000097822	ENSDARG00000034424	5:37875377-37906828	1.0862	2.81088	1.37174	5.13206	5e-05	0.000238134	Ups	atp1b2b	K01540	biological_process:startle response(GO:0001964);biological_process:startle response(GO:0001964);cellular_component:sodium:potassium-exchanging ATPase complex(GO:0005890);biological_process:transport(GO:0006810);biological_process:ion transport(GO:0006811);biological_process:potassium ion transport(GO:0006813);biological_process:sodium ion transport(GO:0006814);biological_process:heart development…
ENSDART00000097888	ENSDARG00000067927	20:47691432-47805965	1.12595	0.561066	-1.0049	-2.24795	0.00565	0.0176989	Down	CABZ01059104.1	_	_
ENSDART00000097964	ENSDARG00000074069	1:55793366-55798474	0	1.38053	inf	-nan	5e-05	0.000238134	Ups	zgc:171452	_	molecular_function:GTP binding(GO:0005525);biological_process:biological_process(GO:0008150);cellular_component:membrane(GO:0016020);cellular_component:integral component of membrane(GO:0016021)
ENSDART00000098010	ENSDARG00000035415	5:34798591-34801415	3.15664	1.10473	-1.5147	-4.43483	5e-05	0.000238134	Down	ptger4b	K04261	molecular_function:signal transducer activity(GO:0004871);molecular_function:G-protein coupled receptor activity(GO:0004930);molecular_function:prostaglandin receptor activity(GO:0004955);molecular_function:prostaglandin E receptor activity(GO:0004957);molecular_function:prostaglandin E receptor activity(GO:0004957);cellular_component:integral component of plasma membrane(GO:0005887);biological_p…
ENSDART00000098038	ENSDARG00000028118	15:6150469-6416801	2.21919	6.0422	1.44504	14.217	5e-05	0.000238134	Ups	dscamb	K06767	cellular_component:integral component of plasma membrane(GO:0005887);biological_process:cell adhesion(GO:0007155);biological_process:nervous system development(GO:0007399);cellular_component:membrane(GO:0016020);cellular_component:integral component of membrane(GO:0016021)
ENSDART00000098054	ENSDARG00000094131	2:48090788-48097601	0.256244	0.934375	1.86648	2.77195	0.0033	0.0109954	Ups	ftr19	_	cellular_component:intracellular(GO:0005622);molecular_function:zinc ion binding(GO:0008270);molecular_function:metal ion binding(GO:0046872)
ENSDART00000098061	ENSDARG00000052978	2:47886275-47975318	3.08577	0.987735	-1.64343	-3.21792	0.0003	0.00126972	Down	mbnl1	K14943	cellular_component:cellular_component(GO:0005575);biological_process:biological_process(GO:0008150);molecular_function:metal ion binding(GO:0046872)
ENSDART00000098143	ENSDARG00000017038	2:44495474-44509945	0.343343	1.02912	1.58369	2.38326	0.0076	0.0229952	Ups	zgc:152670	_	molecular_function:procollagen-proline 4-dioxygenase activity(GO:0004656);molecular_function:iron ion binding(GO:0005506);cellular_component:endoplasmic reticulum(GO:0005783);molecular_function:oxidoreductase activity(GO:0016491);molecular_function:oxidoreductase activity, acting on single donors with incorporation of molecular oxygen, incorporation of two atoms of oxygen(GO:0016702);molecular_fu…
ENSDART00000098284	ENSDARG00000053293	2:43281728-43286282	1.67615	0.820206	-1.03109	-3.31939	0.0001	0.000458341	Down	ftr14	_	cellular_component:intracellular(GO:0005622);molecular_function:zinc ion binding(GO:0008270);biological_process:intracellular signal transduction(GO:0035556);molecular_function:metal ion binding(GO:0046872)
ENSDART00000098303	ENSDARG00000001721	2:43093133-43110935	11.889	3.47122	-1.77611	-14.5579	5e-05	0.000238134	Down	oc90	_	molecular_function:phospholipase A2 activity(GO:0004623);molecular_function:calcium ion binding(GO:0005509);cellular_component:extracellular region(GO:0005576);biological_process:phospholipid metabolic process(GO:0006644);biological_process:lipid catabolic process(GO:0016042);biological_process:otolith development(GO:0048840);biological_process:otolith development(GO:0048840);biological_process:a…
ENSDART00000098364	ENSDARG00000068157	5:28890030-28914576	0.439684	0.990499	1.17169	1.91931	0.00965	0.0283647	Ups	ehmt1a	K11420	cellular_component:nucleus(GO:0005634);cellular_component:chromosome(GO:0005694);molecular_function:methyltransferase activity(GO:0008168);molecular_function:zinc ion binding(GO:0008270);molecular_function:transferase activity(GO:0016740);molecular_function:histone-lysine N-methyltransferase activity(GO:0018024);biological_process:methylation(GO:0032259);biological_process:histone lysine methylat…
ENSDART00000098500	ENSDARG00000056477	5:25570454-25586979	2.188	1.0571	-1.0495	-2.48742	0.002	0.00708007	Down	ccdc125	_	_
ENSDART00000098627	ENSDARG00000068261	1:127249-596152	5.51242	2.62686	-1.06934	-4.73612	5e-05	0.000238134	Down	pros1	K03908	molecular_function:calcium ion binding(GO:0005509);cellular_component:extracellular region(GO:0005576);biological_process:negative regulation of blood coagulation(GO:0030195)
ENSDART00000098840	ENSDARG00000068370	8:32905393-33104970	0.196176	0.681925	1.79747	2.29584	0.005	0.0158791	Ups	ralgps1	_	molecular_function:guanyl-nucleotide exchange factor activity(GO:0005085);cellular_component:cytoplasm(GO:0005737);cellular_component:plasma membrane(GO:0005886);biological_process:small GTPase mediated signal transduction(GO:0007264);cellular_component:membrane(GO:0016020)
ENSDART00000098970	ENSDARG00000016999	19:15536659-15564825	1.30407	0.585972	-1.15412	-1.99818	0.00475	0.0151858	Down	lin28a	K18754	cellular_component:cytoplasmic mRNA processing body(GO:0000932);molecular_function:nucleic acid binding(GO:0003676);molecular_function:DNA binding(GO:0003677);molecular_function:RNA binding(GO:0003723);molecular_function:RNA binding(GO:0003723);cellular_component:nucleus(GO:0005634);cellular_component:cytoplasm(GO:0005737);biological_process:regulation of transcription, DNA-templated(GO:0006355);…
ENSDART00000099252	ENSDARG00000068589	21:333324-337610	120.708	59.503	-1.02048	-17.2783	5e-05	0.000238134	Down	CABZ01079764.1	_	_
ENSDART00000099259	ENSDARG00000038156	10:42305875-42318938	4.17074	1.18621	-1.81394	-2.45534	0.01595	0.0439011	Down	dusp11	_	molecular_function:protein tyrosine phosphatase activity(GO:0004725);cellular_component:cellular_component(GO:0005575);biological_process:protein dephosphorylation(GO:0006470);molecular_function:protein tyrosine/serine/threonine phosphatase activity(GO:0008138);biological_process:dephosphorylation(GO:0016311);molecular_function:phosphatase activity(GO:0016791)
ENSDART00000099616	ENSDARG00000068792	8:24695593-24725151	0.29645	1.91714	2.6931	4.0688	5e-05	0.000238134	Ups	si:dkey-176g4.4	_	_
ENSDART00000099792	ENSDARG00000068892	15:34637086-34732851	1.64905	9.92674	2.58969	5.89348	5e-05	0.000238134	Ups	sostdc1a	_	molecular_function:molecular_function(GO:0003674);cellular_component:extracellular space(GO:0005615);biological_process:biological_process(GO:0008150)
ENSDART00000099841	ENSDARG00000068919	10:32713635-32728648	2.22574	1.08625	-1.03492	-2.69692	0.00045	0.00184244	Down	rad51c	K10870	molecular_function:recombinase activity(GO:0000150);molecular_function:four-way junction DNA binding(GO:0000400);biological_process:DNA recombinase assembly(GO:0000730);cellular_component:condensed nuclear chromosome(GO:0000794);molecular_function:DNA binding(GO:0003677);molecular_function:double-stranded DNA binding(GO:0003690);molecular_function:single-stranded DNA binding(GO:0003697);molecular…
ENSDART00000099847	ENSDARG00000039064	13:40560242-40600975	2.49823	0.976537	-1.35516	-3.86911	5e-05	0.000238134	Down	st3gal7	_	biological_process:ganglioside biosynthetic process(GO:0001574);molecular_function:beta-galactoside (CMP) alpha-2,3-sialyltransferase activity(GO:0003836);molecular_function:exo-alpha-sialidase activity(GO:0004308);cellular_component:Golgi apparatus(GO:0005794);biological_process:protein glycosylation(GO:0006486);molecular_function:sialyltransferase activity(GO:0008373);biological_process:oligosa…
ENSDART00000099863	ENSDARG00000073743	8:50202095-50229269	2.18402	0.803784	-1.4421	-4.9487	5e-05	0.000238134	Down	slc25a37	K15113	molecular_function:iron ion transmembrane transporter activity(GO:0005381);cellular_component:mitochondrion(GO:0005739);cellular_component:mitochondrion(GO:0005739);cellular_component:mitochondrial inner membrane(GO:0005743);biological_process:transport(GO:0006810);biological_process:ion transport(GO:0006811);cellular_component:membrane(GO:0016020);cellular_component:integral component of membran…
ENSDART00000099866	ENSDARG00000012073	25:34563207-34590180	1.08493	0.22718	-2.2557	-3.37675	5e-05	0.000238134	Down	kif15	K10400	molecular_function:nucleotide binding(GO:0000166);molecular_function:microtubule motor activity(GO:0003777);molecular_function:microtubule motor activity(GO:0003777);molecular_function:ATP binding(GO:0005524);cellular_component:kinesin complex(GO:0005871);cellular_component:microtubule(GO:0005874);biological_process:microtubule-based movement(GO:0007018);biological_process:microtubule-based movem…
ENSDART00000099919	ENSDARG00000036147	7:32562990-32624518	0.761453	2.42077	1.66864	2.77786	0.0001	0.000458341	Ups	ano5b	K19480	cellular_component:membrane(GO:0016020);cellular_component:integral component of membrane(GO:0016021);molecular_function:protein dimerization activity(GO:0046983)
ENSDART00000099960	ENSDARG00000068966	8:22456850-22468746	0.595932	0	-inf	-nan	5e-05	0.000238134	Down	si:ch211-261n11.7	_	molecular_function:tumor necrosis factor-activated receptor activity(GO:0005031);cellular_component:integral component of plasma membrane(GO:0005887);biological_process:inflammatory response(GO:0006954);biological_process:immune response(GO:0006955);biological_process:multicellular organismal development(GO:0007275);cellular_component:membrane(GO:0016020);cellular_component:integral component of …
ENSDART00000100159	ENSDARG00000069043	2:53729739-53753878	1.94404	0.927798	-1.06718	-4.05255	5e-05	0.000238134	Down	HSD11B1L (1 of many)	K15680	_
ENSDART00000100278	ENSDARG00000037393	14:21683200-21802873	1.05931	4.6408	2.13125	2.22161	0.00775	0.0233974	Ups	slc43a1a	_	cellular_component:integral component of plasma membrane(GO:0005887);molecular_function:neutral amino acid transmembrane transporter activity(GO:0015175);molecular_function:L-amino acid transmembrane transporter activity(GO:0015179);cellular_component:membrane(GO:0016020);cellular_component:integral component of membrane(GO:0016021);biological_process:transmembrane transport(GO:0055085);biologica…
ENSDART00000100482	ENSDARG00000041430	20:45989444-45995429	4.40329	2.17279	-1.01903	-3.21272	0.00015	0.000666878	Down	bmp2b	K04662	biological_process:negative regulation of transcription from RNA polymerase II promoter(GO:0000122);biological_process:mesodermal cell fate commitment(GO:0001710);biological_process:liver development(GO:0001889);molecular_function:cytokine activity(GO:0005125);molecular_function:transforming growth factor beta receptor binding(GO:0005160);cellular_component:extracellular region(GO:0005576);cellul…
ENSDART00000100494	ENSDARG00000069189	18:19131913-19139062	0.783786	0	-inf	-nan	5e-05	0.000238134	Down	si:dkey-242h9.3	_	_
ENSDART00000100504	ENSDARG00000069192	13:33238011-34433123	89.3282	42.9728	-1.05569	-6.73503	5e-05	0.000238134	Down	zgc:163030	_	molecular_function:protease binding(GO:0002020);molecular_function:cysteine-type endopeptidase inhibitor activity(GO:0004869);molecular_function:cysteine-type endopeptidase inhibitor activity(GO:0004869);cellular_component:extracellular space(GO:0005615);biological_process:negative regulation of peptidase activity(GO:0010466);molecular_function:peptidase inhibitor activity(GO:0030414);biological_…
ENSDART00000100508	ENSDARG00000069196	21:33690296-33961174	0.49326	2.02207	2.03541	2.86169	5e-05	0.000238134	Ups	ebf1b	K09103	molecular_function:RNA polymerase II core promoter proximal region sequence-specific DNA binding transcription factor activity involved in positive regulation of transcription(GO:0001077);molecular_function:DNA binding(GO:0003677);cellular_component:nucleus(GO:0005634);cellular_component:nucleus(GO:0005634);biological_process:transcription, DNA-templated(GO:0006351);biological_process:regulation …
ENSDART00000100516	ENSDARG00000043281	8:18620694-18637125	2.07644	0.532569	-1.96307	-2.68498	0.0091	0.0269299	Down	stap2b	_	cellular_component:cellular_component(GO:0005575)
ENSDART00000100571	ENSDARG00000070584	20:44028187-44071781	1.07921	5.02302	2.21858	4.46107	5e-05	0.000238134	Ups	clic5b	K05025	molecular_function:glutathione transferase activity(GO:0004364);molecular_function:voltage-gated ion channel activity(GO:0005244);molecular_function:chloride channel activity(GO:0005254);molecular_function:chloride channel activity(GO:0005254);cellular_component:nucleus(GO:0005634);cellular_component:cytoplasm(GO:0005737);cellular_component:cytoplasm(GO:0005737);biological_process:glutathione met…
ENSDART00000100619	ENSDARG00000019765	1:54491478-54505437	2.63737	14.9265	2.5007	7.42071	5e-05	0.000238134	Ups	zgc:158803	_	molecular_function:mRNA binding(GO:0003729);molecular_function:mRNA binding(GO:0003729);cellular_component:U1 snRNP(GO:0005685);cellular_component:U1 snRNP(GO:0005685);biological_process:mRNA splice site selection(GO:0006376);biological_process:mRNA splice site selection(GO:0006376);cellular_component:U2-type prespliceosome(GO:0071004)
ENSDART00000100681	ENSDARG00000017466	9:35360055-35748212	0.765292	2.04532	1.41825	3.26591	5e-05	0.000238134	Ups	ncam2	K06491	biological_process:response to hypoxia(GO:0001666);biological_process:cell adhesion(GO:0007155);cellular_component:membrane(GO:0016020);cellular_component:integral component of membrane(GO:0016021)
ENSDART00000100735	ENSDARG00000025891	9:34832051-34838510	5.53329	27.4111	2.30855	6.55403	5e-05	0.000238134	Ups	shox	_	biological_process:ossification(GO:0001503);molecular_function:DNA binding(GO:0003677);cellular_component:nucleus(GO:0005634);biological_process:regulation of transcription, DNA-templated(GO:0006355);biological_process:bone mineralization(GO:0030282);molecular_function:sequence-specific DNA binding(GO:0043565)
ENSDART00000100772	ENSDARG00000061120	10:24335028-24422264	27.7241	7.70307	-1.84764	-12.6326	5e-05	0.000238134	Down	slc43a2b	K08229	cellular_component:integral component of plasma membrane(GO:0005887);molecular_function:neutral amino acid transmembrane transporter activity(GO:0015175);molecular_function:L-amino acid transmembrane transporter activity(GO:0015179);cellular_component:membrane(GO:0016020);cellular_component:integral component of membrane(GO:0016021);biological_process:transmembrane transport(GO:0055085)
ENSDART00000101014	ENSDARG00000076789	20:40827171-40832254	1.57753	0.754757	-1.06359	-1.99881	0.0107	0.0310603	Down	cx32.2	_	cellular_component:plasma membrane(GO:0005886);cellular_component:gap junction(GO:0005921);cellular_component:connexon complex(GO:0005922);biological_process:cell communication(GO:0007154);cellular_component:membrane(GO:0016020);cellular_component:integral component of membrane(GO:0016021);cellular_component:cell junction(GO:0030054)
ENSDART00000101077	ENSDARG00000069439	10:10830572-10838698	7.93906	3.07256	-1.36953	-2.68441	0.00035	0.00146175	Down	ptgdsa	_	molecular_function:transporter activity(GO:0005215);cellular_component:extracellular region(GO:0005576);biological_process:lipid metabolic process(GO:0006629);biological_process:transport(GO:0006810);molecular_function:small molecule binding(GO:0036094)
ENSDART00000101147	ENSDARG00000056248	21:25150604-25160498	16.5834	102.766	2.63155	7.96018	5e-05	0.000238134	Ups	si:dkey-183i3.5	_	molecular_function:structural molecule activity(GO:0005198);cellular_component:intermediate filament(GO:0005882)
ENSDART00000101152	ENSDARG00000069476	15:20302695-20314784	56.3563	23.252	-1.27722	-18.9124	5e-05	0.000238134	Down	spint2	_	molecular_function:serine-type endopeptidase inhibitor activity(GO:0004867);cellular_component:membrane(GO:0016020);cellular_component:integral component of membrane(GO:0016021)
ENSDART00000101423	ENSDARG00000069600	7:23224845-23271875	1.60116	3.85291	1.26683	2.60469	0.00015	0.000666878	Ups	zgc:109889	K06083	molecular_function:actin binding(GO:0003779);cellular_component:cytoskeleton(GO:0005856);biological_process:actin cytoskeleton organization(GO:0030036)
ENSDART00000101461	ENSDARG00000056950	4:16326715-16345101	5.67687	2.43526	-1.22102	-5.82383	5e-05	0.000238134	Down	epyc	K08127	cellular_component:proteinaceous extracellular matrix(GO:0005578);cellular_component:extracellular space(GO:0005615);biological_process:axonogenesis(GO:0007409);molecular_function:heparin binding(GO:0008201);biological_process:Roundabout signaling pathway(GO:0035385);molecular_function:Roundabout binding(GO:0048495);biological_process:axon extension involved in axon guidance(GO:0048846);biologica…
ENSDART00000101470	ENSDARG00000041505	9:25520035-25535714	89.3357	43.4362	-1.04034	-16.9391	5e-05	0.000238134	Down	itm2bb	K18264	molecular_function:beta-amyloid binding(GO:0001540);cellular_component:Golgi apparatus(GO:0005794);cellular_component:plasma membrane(GO:0005886);biological_process:nervous system development(GO:0007399);cellular_component:membrane(GO:0016020);cellular_component:integral component of membrane(GO:0016021);biological_process:negative regulation of amyloid precursor protein biosynthetic process(GO:0…
ENSDART00000101479	ENSDARG00000022614	13:27202205-27223583	2.07473	0.301496	-2.78271	-5.30565	5e-05	0.000238134	Down	ddx43	K17043	molecular_function:nucleotide binding(GO:0000166);molecular_function:nucleic acid binding(GO:0003676);molecular_function:RNA binding(GO:0003723);molecular_function:ATP-dependent RNA helicase activity(GO:0004004);molecular_function:helicase activity(GO:0004386);molecular_function:ATP binding(GO:0005524);biological_process:RNA secondary structure unwinding(GO:0010501);molecular_function:hydrolase a…
ENSDART00000101580	ENSDARG00000069677	22:33408074-33424025	0.476977	2.50495	2.39279	3.95268	5e-05	0.000238134	Ups	nicn1	K16607	molecular_function:molecular_function(GO:0003674);cellular_component:cellular_component(GO:0005575);biological_process:biological_process(GO:0008150)
ENSDART00000101613	ENSDARG00000069698	4:15820972-15842044	0.664727	0.278601	-1.25456	-2.44943	0.00385	0.0126144	Down	lrguk	_	_
ENSDART00000101707	ENSDARG00000041586	15:17322220-17349166	2.65415	0.828113	-1.68035	-7.6153	5e-05	0.000238134	Down	dhx40	K18711	molecular_function:nucleotide binding(GO:0000166);molecular_function:nucleic acid binding(GO:0003676);molecular_function:ATP-dependent RNA helicase activity(GO:0004004);molecular_function:helicase activity(GO:0004386);molecular_function:ATP binding(GO:0005524);cellular_component:nucleolus(GO:0005730);cellular_component:cytoplasm(GO:0005737);biological_process:RNA processing(GO:0006396);molecular_…
ENSDART00000101902	ENSDARG00000069817	9:22316748-22528713	357.901	729.646	1.02764	15.949	5e-05	0.000238134	Ups	crygm2d8	_	cellular_component:cellular_component(GO:0005575)
ENSDART00000101911	ENSDARG00000005739	1:28157820-28241594	6.40351	14.9796	1.22606	4.29224	5e-05	0.000238134	Ups	gpm6ba	_	molecular_function:molecular_function(GO:0003674);biological_process:biological_process(GO:0008150);cellular_component:membrane(GO:0016020);cellular_component:integral component of membrane(GO:0016021)
ENSDART00000101916	ENSDARG00000069826	9:22305730-22306561	30.21	215.578	2.83511	26.3178	5e-05	0.000238134	Ups	crygm2d15	_	cellular_component:cellular_component(GO:0005575)
ENSDART00000101923	ENSDARG00000069827	9:22287705-22288667	1.11142	25.5306	4.52175	9.84642	5e-05	0.000238134	Ups	crygm2d11	_	molecular_function:molecular_function(GO:0003674);cellular_component:cellular_component(GO:0005575);biological_process:biological_process(GO:0008150)
ENSDART00000101944	ENSDARG00000018797	9:22245302-22246789	2.16992	9.38219	2.11228	6.50983	5e-05	0.000238134	Ups	crygmxl1	_	molecular_function:molecular_function(GO:0003674);cellular_component:cellular_component(GO:0005575);biological_process:biological_process(GO:0008150)
ENSDART00000102016	ENSDARG00000041980	16:32272633-32279433	0.294904	0.835084	1.50168	2.09273	0.0178	0.04829	Ups	fam26f	_	molecular_function:cation channel activity(GO:0005261);cellular_component:integral component of plasma membrane(GO:0005887);cellular_component:membrane(GO:0016020);cellular_component:integral component of membrane(GO:0016021)
ENSDART00000102455	ENSDARG00000013787	1:25092971-25108222	0.21382	0.723255	1.75811	2.18463	0.0055	0.017278	Ups	gucy1a3	K12318	molecular_function:nucleotide binding(GO:0000166);molecular_function:adenylate cyclase activity(GO:0004016);molecular_function:guanylate cyclase activity(GO:0004383);molecular_function:guanylate cyclase activity(GO:0004383);cellular_component:plasma membrane(GO:0005886);biological_process:cGMP biosynthetic process(GO:0006182);biological_process:signal transduction(GO:0007165);cellular_component:g…
ENSDART00000102459	ENSDARG00000070038	15:5815606-5827155	47.8189	110.794	1.21223	13.3969	5e-05	0.000238134	Ups	rbp2a	K14622	molecular_function:transporter activity(GO:0005215);biological_process:vitamin A metabolic process(GO:0006776);biological_process:transport(GO:0006810);molecular_function:lipid binding(GO:0008289);molecular_function:retinal binding(GO:0016918)
ENSDART00000102483	ENSDARG00000070047	6:35378841-35383561	43.4927	15.6535	-1.47429	-21.575	5e-05	0.000238134	Down	rgs4	K16449	molecular_function:GTPase activator activity(GO:0005096);cellular_component:cytoplasm(GO:0005737);cellular_component:plasma membrane(GO:0005886);biological_process:axonogenesis(GO:0007409);biological_process:locomotory behavior(GO:0007626);biological_process:endocrine pancreas development(GO:0031018)
ENSDART00000102508	ENSDARG00000070057	9:11616425-11624533	19.6452	8.91897	-1.13923	-4.89097	5e-05	0.000238134	Down	si:dkey-69o16.5	K05995	biological_process:proteolysis(GO:0006508);molecular_function:peptidase activity(GO:0008233);molecular_function:serine-type peptidase activity(GO:0008236)
ENSDART00000102539	ENSDARG00000036584	21:5044868-5076228	1.62005	4.16191	1.3612	3.03624	0.0008	0.00310639	Ups	st8sia5	K03369	molecular_function:alpha-N-acetylneuraminate alpha-2,8-sialyltransferase activity(GO:0003828);molecular_function:alpha-N-acetylneuraminate alpha-2,8-sialyltransferase activity(GO:0003828);cellular_component:Golgi apparatus(GO:0005794);biological_process:protein glycosylation(GO:0006486);molecular_function:sialyltransferase activity(GO:0008373);cellular_component:membrane(GO:0016020);cellular_comp…
ENSDART00000102543	ENSDARG00000094973	4:10707905-10764698	0.90507	2.47968	1.45405	2.81459	0.001	0.00381495	Ups	wnt16	K01558	biological_process:hematopoietic progenitor cell differentiation(GO:0002244);molecular_function:receptor binding(GO:0005102);molecular_function:frizzled binding(GO:0005109);cellular_component:extracellular region(GO:0005576);cellular_component:proteinaceous extracellular matrix(GO:0005578);cellular_component:extracellular space(GO:0005615);biological_process:Notch signaling pathway(GO:0007219);bi…
ENSDART00000102584	ENSDARG00000024651	7:9045441-9060094	2.35316	0.373799	-2.65426	-2.24975	0.01195	0.0341711	Down	snrpa1	_	biological_process:mRNA splicing, via spliceosome(GO:0000398);cellular_component:U2 snRNP(GO:0005686);molecular_function:U2 snRNA binding(GO:0030620)
ENSDART00000102620	ENSDARG00000070107	7:7168322-7186932	0.555362	6.26375	3.49553	14.246	5e-05	0.000238134	Ups	six7	_	biological_process:eye development(GO:0001654);molecular_function:DNA binding(GO:0003677);cellular_component:nucleus(GO:0005634);biological_process:retinal cone cell development(GO:0046549);biological_process:embryonic camera-type eye morphogenesis(GO:0048596)
ENSDART00000102725	ENSDARG00000075592	19:373603-379543	0.704796	0.336216	-1.06781	-2.47307	0.0023	0.00800308	Down	tnfaip8l2a	_	biological_process:immune system process(GO:0002376);molecular_function:molecular_function(GO:0003674);cellular_component:cytoplasm(GO:0005737);biological_process:innate immune response(GO:0045087);biological_process:negative regulation of inflammatory response(GO:0050728);biological_process:negative regulation of T cell activation(GO:0050868)
ENSDART00000102791	ENSDARG00000039066	13:2303262-2315264	34.2391	13.6207	-1.32985	-5.95259	5e-05	0.000238134	Down	klhl31	K10467	molecular_function:ubiquitin-protein transferase activity(GO:0004842);biological_process:regulation of transcription, DNA-templated(GO:0006355);biological_process:skeletal muscle tissue development(GO:0007519);cellular_component:Cul3-RING ubiquitin ligase complex(GO:0031463)
ENSDART00000102981	ENSDARG00000077403	9:30279909-30292032	44.8224	12.3639	-1.85808	-24.0282	5e-05	0.000238134	Down	col8a1a	_	cellular_component:extracellular region(GO:0005576);cellular_component:collagen trimer(GO:0005581);biological_process:notochord formation(GO:0014028);biological_process:notochord development(GO:0030903);biological_process:notochord morphogenesis(GO:0048570);biological_process:head development(GO:0060322)
ENSDART00000103004	ENSDARG00000074745	13:1596015-1650722	83.3103	37.7133	-1.14342	-27.7637	5e-05	0.000238134	Down	CABZ01044297.1	_	_
ENSDART00000103144	ENSDARG00000031388	6:58837911-58873462	0.613197	3.22727	2.39589	2.94786	0.0001	0.000458341	Ups	dctn2	K10424	biological_process:eye photoreceptor cell differentiation(GO:0001754);molecular_function:motor activity(GO:0003774);cellular_component:cytoplasm(GO:0005737);cellular_component:cytoplasm(GO:0005737);cellular_component:centrosome(GO:0005813);cellular_component:cytoskeleton(GO:0005856);cellular_component:dynactin complex(GO:0005869);cellular_component:dynactin complex(GO:0005869);cellular_component:…
ENSDART00000103150	ENSDARG00000036695	23:35882634-35904479	2.11478	5.52565	1.38564	2.61491	0.00145	0.00531371	Ups	calcoco1a	_	_
ENSDART00000103190	ENSDARG00000020866	16:23999037-24033538	138.184	63.6643	-1.11804	-7.0961	5e-05	0.000238134	Down	apoa4b.2	_	cellular_component:extracellular region(GO:0005576);biological_process:cholesterol biosynthetic process(GO:0006695);biological_process:transport(GO:0006810);biological_process:lipid transport(GO:0006869);molecular_function:lipid binding(GO:0008289);biological_process:positive regulation of cholesterol esterification(GO:0010873);biological_process:positive regulation of triglyceride catabolic proc…
ENSDART00000103232	ENSDARG00000070389	20:26790945-26793854	1.90871	4.38111	1.1987	5.33348	5e-05	0.000238134	Ups	foxf2b	_	molecular_function:DNA binding(GO:0003677);molecular_function:sequence-specific DNA binding transcription factor activity(GO:0003700);molecular_function:RNA polymerase II distal enhancer sequence-specific DNA binding transcription factor activity(GO:0003705);cellular_component:nucleus(GO:0005634);biological_process:regulation of transcription, DNA-templated(GO:0006355);molecular_function:sequence…
ENSDART00000103236	ENSDARG00000056376	1:17002488-17005836	3.43478	1.18209	-1.53888	-3.88468	5e-05	0.000238134	Down	ankrd37	_	_
ENSDART00000103277	ENSDARG00000070406	3:32214388-32215327	1.04426	0	-inf	-nan	5e-05	0.000238134	Down	BX511021.1	_	_
ENSDART00000103319	ENSDARG00000016691	4:4226080-4252760	82.3683	40.3832	-1.02834	-14.0864	5e-05	0.000238134	Down	cd9b	K06460	cellular_component:integral component of plasma membrane(GO:0005887);biological_process:cell surface receptor signaling pathway(GO:0007166);cellular_component:membrane(GO:0016020);cellular_component:integral component of membrane(GO:0016021);biological_process:posterior lateral line development(GO:0048916)
ENSDART00000103347	ENSDARG00000070429	17:51845267-51848922	0.759678	4.1	2.43216	3.46276	0.0008	0.00310639	Ups	C14orf1	_	_
ENSDART00000103355	ENSDARG00000070434	20:28465651-28469047	11.8409	5.73345	-1.0463	-7.27617	5e-05	0.000238134	Down	rhov	K07866	molecular_function:GTP binding(GO:0005525);biological_process:small GTPase mediated signal transduction(GO:0007264);biological_process:epiboly involved in gastrulation with mouth forming second(GO:0055113);biological_process:protein localization to adherens junction(GO:0071896)
ENSDART00000103385	ENSDARG00000020893	6:49096982-49108393	158.548	78.8735	-1.00731	-25.2188	5e-05	0.000238134	Down	slc25a22	K15107	molecular_function:L-glutamate transmembrane transporter activity(GO:0005313);cellular_component:mitochondrial inner membrane(GO:0005743);biological_process:transport(GO:0006810);cellular_component:membrane(GO:0016020);cellular_component:integral component of membrane(GO:0016021);biological_process:transmembrane transport(GO:0055085)
ENSDART00000103502	ENSDARG00000019741	3:30023123-30027553	8.98329	4.06388	-1.14439	-5.94331	5e-05	0.000238134	Down	si:ch211-152f23.5	_	molecular_function:molecular_function(GO:0003674);cellular_component:nucleus(GO:0005634);biological_process:cell cycle(GO:0007049)
ENSDART00000103536	ENSDARG00000070498	12:7412091-7480413	0.6907	2.23671	1.69525	3.04747	0.0005	0.00202494	Ups	phyhiplb	_	molecular_function:molecular_function(GO:0003674);biological_process:biological_process(GO:0008150)
ENSDART00000103583	ENSDARG00000070506	3:1873031-1878232	0.762386	0	-inf	-nan	5e-05	0.000238134	Down	CR450842.1	_	_
ENSDART00000103584	ENSDARG00000070516	3:1911878-1912909	2.03494	0	-inf	-nan	5e-05	0.000238134	Down	si:dkeyp-52c3.2	_	_
ENSDART00000103737	ENSDARG00000070568	3:26113481-26135593	1.95238	4.44045	1.18547	1.62927	0.0098	0.0287468	Ups	atad5a	_	molecular_function:ATP binding(GO:0005524);cellular_component:cellular_component(GO:0005575)
ENSDART00000103752	ENSDARG00000055552	11:24123127-24190703	2.00184	4.53825	1.18081	5.71575	5e-05	0.000238134	Ups	dvl1b	K02353	molecular_function:frizzled binding(GO:0005109);cellular_component:cytosol(GO:0005829);biological_process:Wnt signaling pathway(GO:0016055);biological_process:intracellular signal transduction(GO:0035556);biological_process:canonical Wnt signaling pathway(GO:0060070);biological_process:planar cell polarity pathway involved in neural tube closure(GO:0090179)
ENSDART00000103757	ENSDARG00000074002	6:40631529-40648667	13.1587	5.31596	-1.30761	-11.1858	5e-05	0.000238134	Down	slc6a11a	K05039	molecular_function:neurotransmitter:sodium symporter activity(GO:0005328);molecular_function:gamma-aminobutyric acid:sodium symporter activity(GO:0005332);cellular_component:integral component of plasma membrane(GO:0005887);biological_process:transport(GO:0006810);biological_process:neurotransmitter transport(GO:0006836);biological_process:neurotransmitter transport(GO:0006836);biological_process…
ENSDART00000103766	ENSDARG00000009754	11:23796487-23806729	4.75269	2.17431	-1.12819	-2.77315	0.00025	0.00107263	Down	zc3h11a	_	cellular_component:cellular_component(GO:0005575);biological_process:biological_process(GO:0008150);molecular_function:metal ion binding(GO:0046872)
ENSDART00000103784	ENSDARG00000070578	19:15372350-15377634	1.02716	0.409321	-1.32736	-2.55936	0.002	0.00708007	Down	edn2	K16367	cellular_component:extracellular region(GO:0005576);biological_process:regulation of vasoconstriction(GO:0019229);biological_process:vasoconstriction(GO:0042310)
ENSDART00000103922	ENSDARG00000004472	19:27895339-27922145	3.36866	7.72511	1.19738	5.35111	5e-05	0.000238134	Ups	atat1	_	molecular_function:lysine N-acetyltransferase activity, acting on acetyl phosphate as donor(GO:0004468);cellular_component:cytoplasm(GO:0005737);cellular_component:spindle(GO:0005819);cellular_component:cytoskeleton(GO:0005856);cellular_component:microtubule(GO:0005874);cellular_component:coated pit(GO:0005905);cellular_component:focal adhesion(GO:0005925);cellular_component:membrane(GO:0016020);…
ENSDART00000104009	ENSDARG00000053896	17:37268234-37273459	4.87954	1.75056	-1.47893	-6.1445	5e-05	0.000238134	Down	slc30a1b	_	molecular_function:zinc ion transmembrane transporter activity(GO:0005385);cellular_component:endoplasmic reticulum(GO:0005783);cellular_component:Golgi apparatus(GO:0005794);cellular_component:plasma membrane(GO:0005886);biological_process:cation transport(GO:0006812);molecular_function:cation transmembrane transporter activity(GO:0008324);biological_process:response to zinc ion(GO:0010043);cell…
ENSDART00000104074	ENSDARG00000058462	6:39339194-39346723	0.672364	3.39255	2.33506	6.54793	5e-05	0.000238134	Ups	zgc:158846	K07605	molecular_function:structural molecule activity(GO:0005198);cellular_component:intermediate filament(GO:0005882);biological_process:biological_process(GO:0008150);cellular_component:keratin filament(GO:0045095)
ENSDART00000104140	ENSDARG00000070734	25:16689529-16736502	1.89887	4.7172	1.31279	4.01014	5e-05	0.000238134	Ups	dyrk4	K18669	molecular_function:protein kinase activity(GO:0004672);molecular_function:ATP binding(GO:0005524);biological_process:protein phosphorylation(GO:0006468)
ENSDART00000104188	ENSDARG00000056084	23:21711706-21735365	0.195055	1.08535	2.47621	3.8205	0.0002	0.000872038	Ups	igsf21b	_	molecular_function:protein binding(GO:0005515);cellular_component:cellular_component(GO:0005575);biological_process:biological_process(GO:0008150)
ENSDART00000104209	ENSDARG00000070770	23:21528600-21534589	6.06267	12.517	1.04587	3.05142	5e-05	0.000238134	Ups	her4.3	_	molecular_function:DNA binding(GO:0003677);cellular_component:nucleus(GO:0005634);biological_process:transcription, DNA-templated(GO:0006351);biological_process:regulation of transcription, DNA-templated(GO:0006355);molecular_function:protein dimerization activity(GO:0046983);biological_process:peripheral nervous system neuron axonogenesis(GO:0048936)
ENSDART00000104327	ENSDARG00000056292	17:21043566-21046269	6.10419	39.6601	2.69982	18.2249	5e-05	0.000238134	Ups	vsx1	K09335	molecular_function:DNA binding(GO:0003677);molecular_function:chromatin binding(GO:0003682);cellular_component:nucleus(GO:0005634);cellular_component:nucleus(GO:0005634);biological_process:transcription, DNA-templated(GO:0006351);biological_process:regulation of transcription, DNA-templated(GO:0006355);biological_process:multicellular organismal development(GO:0007275);biological_process:visual p…
ENSDART00000104353	ENSDARG00000007788	25:19511761-19568156	0.645518	1.45862	1.17608	4.74591	5e-05	0.000238134	Ups	atp2b1b	_	molecular_function:nucleotide binding(GO:0000166);molecular_function:calcium-transporting ATPase activity(GO:0005388);molecular_function:calcium-transporting ATPase activity(GO:0005388);molecular_function:ATP binding(GO:0005524);cellular_component:integral component of plasma membrane(GO:0005887);biological_process:transport(GO:0006810);biological_process:ion transport(GO:0006811);biological_proc…
ENSDART00000104361	ENSDARG00000070845	3:15275984-15301297	1.35302	5.07813	1.90811	4.55334	5e-05	0.000238134	Ups	si:dkey-56d12.4	_	molecular_function:nucleic acid binding(GO:0003676)
ENSDART00000104481	ENSDARG00000016480	3:16462773-16510135	0.855778	2.05466	1.26359	3.54589	5e-05	0.000238134	Ups	slc17a7a	K12302	molecular_function:sodium:inorganic phosphate symporter activity(GO:0015319);molecular_function:sodium-dependent phosphate transmembrane transporter activity(GO:0015321);cellular_component:membrane(GO:0016020);cellular_component:integral component of membrane(GO:0016021);cellular_component:integral component of membrane(GO:0016021);cellular_component:synaptic vesicle membrane(GO:0030672);biologic…
ENSDART00000104532	ENSDARG00000070929	6:26567417-26569360	6.21082	15.2385	1.29487	10.3173	5e-05	0.000238134	Ups	sox14	K09267	molecular_function:DNA binding(GO:0003677);cellular_component:nucleus(GO:0005634);biological_process:transcription, DNA-templated(GO:0006351);biological_process:regulation of transcription, DNA-templated(GO:0006355);biological_process:multicellular organismal development(GO:0007275);biological_process:hypothalamus development(GO:0021854)
ENSDART00000104596	ENSDARG00000070950	19:9748055-9764583	2.39624	0.214589	-3.48113	-3.09461	0.016	0.0440176	Down	STYK1 (1 of many)	K17510	molecular_function:protein kinase activity(GO:0004672);molecular_function:ATP binding(GO:0005524);biological_process:protein phosphorylation(GO:0006468);cellular_component:membrane(GO:0016020);cellular_component:integral component of membrane(GO:0016021)
ENSDART00000104715	ENSDARG00000071007	17:23414186-23426736	1.45248	0.528894	-1.45747	-2.50421	0.00705	0.0215237	Down	pcgf5a	K11489	cellular_component:nucleus(GO:0005634);biological_process:transcription, DNA-templated(GO:0006351);biological_process:regulation of transcription, DNA-templated(GO:0006355);molecular_function:zinc ion binding(GO:0008270);cellular_component:PcG protein complex(GO:0031519);molecular_function:metal ion binding(GO:0046872)
ENSDART00000104834	ENSDARG00000071065	23:14088836-14121821	1.34438	3.31721	1.30302	2.96388	5e-05	0.000238134	Ups	g6pd	K00036	molecular_function:glucose-6-phosphate dehydrogenase activity(GO:0004345);biological_process:carbohydrate metabolic process(GO:0005975);biological_process:glucose metabolic process(GO:0006006);biological_process:pentose-phosphate shunt(GO:0006098);molecular_function:oxidoreductase activity(GO:0016491);molecular_function:NADP binding(GO:0050661);biological_process:oxidation-reduction process(GO:00…
ENSDART00000104874	ENSDARG00000071082	17:20127566-20147370	30.0904	10.231	-1.55636	-18.4504	5e-05	0.000238134	Down	p4ha1b	K00472	molecular_function:procollagen-proline 4-dioxygenase activity(GO:0004656);molecular_function:iron ion binding(GO:0005506);cellular_component:endoplasmic reticulum(GO:0005783);molecular_function:oxidoreductase activity(GO:0016491);molecular_function:oxidoreductase activity, acting on single donors with incorporation of molecular oxygen, incorporation of two atoms of oxygen(GO:0016702);molecular_fu…
ENSDART00000104880	ENSDARG00000071083	22:28790540-28828432	1.9782	0.0998205	-4.30871	-4.28989	0.003	0.010119	Down	si:dkeyp-34c12.1	_	_
ENSDART00000104969	ENSDARG00000071143	22:27327526-27333883	1.74557	0	-inf	-nan	5e-05	0.000238134	Down	si:dkey-208m12.2	_	cellular_component:membrane(GO:0016020);cellular_component:integral component of membrane(GO:0016021)
ENSDART00000105004	ENSDARG00000094041	19:5433425-5464284	63.928	27.5837	-1.21263	-4.54885	5e-05	0.000238134	Down	krt17	K07604	molecular_function:structural molecule activity(GO:0005198);cellular_component:intermediate filament(GO:0005882);biological_process:fin regeneration(GO:0031101)
ENSDART00000105040	ENSDARG00000036834	19:5433425-5464284	78.9034	30.3923	-1.37638	-4.86774	5e-05	0.000238134	Down	krt92	K07604	molecular_function:structural molecule activity(GO:0005198);cellular_component:intermediate filament(GO:0005882);biological_process:biological_process(GO:0008150)
ENSDART00000105204	ENSDARG00000013615	8:33920776-34077023	3.94649	10.7359	1.4438	4.28319	5e-05	0.000238134	Ups	pbx3b	K15610	molecular_function:DNA binding(GO:0003677);molecular_function:sequence-specific DNA binding transcription factor activity(GO:0003700);cellular_component:nucleus(GO:0005634);biological_process:regulation of transcription, DNA-templated(GO:0006355);molecular_function:sequence-specific DNA binding(GO:0043565)
ENSDART00000105309	ENSDARG00000027491	12:48750692-48759117	8.82185	4.18924	-1.07439	-2.99429	0.0003	0.00126972	Down	uros	K01719	molecular_function:uroporphyrinogen-III synthase activity(GO:0004852);molecular_function:uroporphyrinogen-III synthase activity(GO:0004852);biological_process:uroporphyrinogen III biosynthetic process(GO:0006780);biological_process:heme biosynthetic process(GO:0006783);biological_process:tetrapyrrole biosynthetic process(GO:0033014)
ENSDART00000105604	ENSDARG00000088366	14:35552487-35571668	1.26301	3.20402	1.34302	2.70185	5e-05	0.000238134	Ups	zgc:77938	_	cellular_component:cellular_component(GO:0005575);molecular_function:zinc ion binding(GO:0008270);molecular_function:oxidoreductase activity(GO:0016491);molecular_function:metal ion binding(GO:0046872);biological_process:oxidation-reduction process(GO:0055114)
ENSDART00000105613	ENSDARG00000071439	22:23249841-23253113	3.31902	1.30239	-1.3496	-2.60128	0.0017	0.00612981	Down	si:dkey-121a9.3	_	_
ENSDART00000105694	ENSDARG00000026090	12:90490-93198	1.8916	0.905039	-1.06355	-2.76467	0.0006	0.00238787	Down	adprm	K01517	cellular_component:cellular_component(GO:0005575);molecular_function:2',3'-cyclic-nucleotide 2'-phosphodiesterase activity(GO:0008663);molecular_function:hydrolase activity(GO:0016787);molecular_function:manganese ion binding(GO:0030145);molecular_function:metal ion binding(GO:0046872);molecular_function:ADP-ribose diphosphatase activity(GO:0047631);molecular_function:CDP-glycerol diphosphatase a…
ENSDART00000105753	ENSDARG00000071493	24:28571934-28814144	0.454972	1.43961	1.66183	2.59962	0.00125	0.00465378	Ups	olfm3a	_	molecular_function:molecular_function(GO:0003674);cellular_component:cellular_component(GO:0005575);biological_process:biological_process(GO:0008150)
ENSDART00000105936	ENSDARG00000094427	22:9874570-9877108	1.01503	2.26729	1.15945	2.0571	0.0074	0.0224729	Ups	si:dkey-253d23.8	_	molecular_function:nucleic acid binding(GO:0003676);molecular_function:metal ion binding(GO:0046872)
ENSDART00000105942	ENSDARG00000095643	22:9801946-9839025	1.74873	5.41887	1.63169	6.17784	5e-05	0.000238134	Ups	si:dkey-253d23.3	_	molecular_function:receptor binding(GO:0005102);biological_process:immune response(GO:0006955);cellular_component:cell surface(GO:0009986);cellular_component:membrane(GO:0016020);cellular_component:integral component of membrane(GO:0016021)
ENSDART00000106100	ENSDARG00000071643	22:6516850-6532772	3.63683	1.2251	-1.56978	-4.77611	5e-05	0.000238134	Down	zgc:171490	_	molecular_function:receptor binding(GO:0005102);biological_process:immune response(GO:0006955);cellular_component:cell surface(GO:0009986);cellular_component:membrane(GO:0016020);cellular_component:integral component of membrane(GO:0016021)
ENSDART00000106103	ENSDARG00000071590	22:9777184-9784454	0.671962	3.01534	2.16587	3.931	5e-05	0.000238134	Ups	si:ch211-236g6.1	_	molecular_function:receptor binding(GO:0005102);biological_process:immune response(GO:0006955);cellular_component:cell surface(GO:0009986);cellular_component:membrane(GO:0016020);cellular_component:integral component of membrane(GO:0016021)
ENSDART00000106113	ENSDARG00000071651	22:6290696-6347813	0.166664	0.688341	2.04618	1.86755	0.00785	0.0236322	Ups	si:dkey-19a16.13	_	_
ENSDART00000106310	ENSDARG00000040310	24:11332698-11365687	2.29158	6.53002	1.51075	4.73167	5e-05	0.000238134	Ups	prpf4bb	K08827	molecular_function:protein kinase activity(GO:0004672);molecular_function:ATP binding(GO:0005524);cellular_component:cellular_component(GO:0005575);biological_process:protein phosphorylation(GO:0006468)
ENSDART00000106705	ENSDARG00000071905	14:2200810-2349164	0.272258	0.953086	1.80763	3.63853	0.00015	0.000666878	Ups	pcdh2ab8	_	_
ENSDART00000108646	ENSDARG00000076870	7:55026810-55332064	6.71968	3.05393	-1.13773	-12.6135	5e-05	0.000238134	Down	piezo1	_	biological_process:transport(GO:0006810);biological_process:ion transport(GO:0006811);biological_process:cell volume homeostasis(GO:0006884);molecular_function:mechanically-gated ion channel activity(GO:0008381);cellular_component:membrane(GO:0016020);cellular_component:integral component of membrane(GO:0016021);biological_process:erythrocyte homeostasis(GO:0034101);biological_process:homeostasis…
ENSDART00000108748	ENSDARG00000086912	9:22310883-22311721	199.343	482.045	1.27392	27.5602	5e-05	0.000238134	Ups	crygm2d18	_	cellular_component:cellular_component(GO:0005575)
ENSDART00000108786	ENSDARG00000077028	6:55831562-55847944	2.7627	1.24963	-1.14458	-2.7983	0.00085	0.00328059	Down	si:ch211-81n22.1	_	molecular_function:N-acetyltransferase activity(GO:0008080);cellular_component:membrane(GO:0016020);cellular_component:integral component of membrane(GO:0016021)
ENSDART00000108852	ENSDARG00000074730	12:14927283-14964316	3.64508	0.835057	-2.12601	-2.75302	0.00965	0.0283647	Down	pkmyt1	K06633	molecular_function:protein kinase activity(GO:0004672);molecular_function:ATP binding(GO:0005524);cellular_component:cellular_component(GO:0005575);biological_process:protein phosphorylation(GO:0006468)
ENSDART00000109037	ENSDARG00000078671	9:11560821-11563419	0.515672	1.07876	1.06484	2.82869	0.00075	0.00293046	Ups	cdk5r2b	K11716	cellular_component:cyclin-dependent protein kinase 5 holoenzyme complex(GO:0016533);molecular_function:cyclin-dependent protein kinase 5 activator activity(GO:0016534)
ENSDART00000109087	ENSDARG00000076544	16:36952808-36991883	1.88055	3.88747	1.04768	2.80474	0.00055	0.00220876	Ups	aldh5a1	K00139	molecular_function:succinate-semialdehyde dehydrogenase (NAD+) activity(GO:0004777);cellular_component:mitochondrion(GO:0005739);biological_process:galactosylceramide metabolic process(GO:0006681);biological_process:metabolic process(GO:0008152);molecular_function:succinate-semialdehyde dehydrogenase [NAD(P)+] activity(GO:0009013);biological_process:gamma-aminobutyric acid catabolic process(GO:00…
ENSDART00000109221	ENSDARG00000079241	24:37596940-37800501	1.60423	0.319072	-2.32993	-7.33614	5e-05	0.000238134	Down	wdr90	_	molecular_function:molecular_function(GO:0003674);cellular_component:cellular_component(GO:0005575);biological_process:biological_process(GO:0008150)
ENSDART00000109236	ENSDARG00000075416	5:9579461-9588793	1.3048	4.08188	1.6454	4.07807	5e-05	0.000238134	Ups	HSCB	K04082	cellular_component:mitochondrion(GO:0005739);biological_process:protein folding(GO:0006457);biological_process:iron-sulfur cluster assembly(GO:0016226);molecular_function:chaperone binding(GO:0051087);molecular_function:chaperone binding(GO:0051087);biological_process:protein oligomerization(GO:0051259)
ENSDART00000109312	ENSDARG00000075783	3:25904678-25929706	1.1012	2.36594	1.10334	3.27868	5e-05	0.000238134	Ups	hmgxb4a	K11298	_
ENSDART00000109340	ENSDARG00000015524	5:22632743-22643860	9.14036	3.61786	-1.33711	-2.87459	0.0004	0.00165256	Down	prps1a	_	molecular_function:magnesium ion binding(GO:0000287);molecular_function:ribose phosphate diphosphokinase activity(GO:0004749);biological_process:nucleoside metabolic process(GO:0009116);biological_process:ribonucleoside monophosphate biosynthetic process(GO:0009156);biological_process:nucleotide biosynthetic process(GO:0009165);biological_process:cellular biosynthetic process(GO:0044249)
ENSDART00000109391	ENSDARG00000077559	16:55351721-55368199	10.1002	4.28344	-1.23754	-11.2537	5e-05	0.000238134	Down	CABZ01052290.1	_	_
ENSDART00000109464	ENSDARG00000078859	23:39713196-39714768	6.56993	1.93969	-1.76005	-4.74297	5e-05	0.000238134	Down	g0s2	_	molecular_function:molecular_function(GO:0003674);cellular_component:mitochondrion(GO:0005739);cellular_component:membrane(GO:0016020);cellular_component:integral component of membrane(GO:0016021);biological_process:positive regulation of extrinsic apoptotic signaling pathway(GO:2001238)
ENSDART00000109486	ENSDARG00000077080	3:62130672-62143516	0.421115	2.70784	2.68486	3.15333	0.00255	0.00877628	Ups	gprc5ba	K04619	molecular_function:G-protein coupled receptor activity(GO:0004930);biological_process:G-protein coupled receptor signaling pathway(GO:0007186);cellular_component:membrane(GO:0016020);cellular_component:integral component of membrane(GO:0016021)
ENSDART00000109544	ENSDARG00000097890	3:48997125-49010736	2.56516	0.572471	-2.16377	-4.31255	5e-05	0.000238134	Down	si:ch1073-100f3.2	K13577	biological_process:transport(GO:0006810);cellular_component:membrane(GO:0016020);cellular_component:integral component of membrane(GO:0016021);biological_process:transmembrane transport(GO:0055085)
ENSDART00000109582	ENSDARG00000075898	17:2521693-2544950	1.51137	3.18826	1.07691	4.17318	5e-05	0.000238134	Ups	spata7	K19655	_
ENSDART00000109596	ENSDARG00000079420	22:11598871-11618640	2.8728	1.13962	-1.33391	-6.05757	5e-05	0.000238134	Down	dpp4	K01278	_
ENSDART00000109737	ENSDARG00000075933	13:583649-594094	3.5103	1.33888	-1.39056	-3.36475	5e-05	0.000238134	Down	cox15	K02259	molecular_function:cytochrome-c oxidase activity(GO:0004129);cellular_component:mitochondrial inner membrane(GO:0005743);biological_process:heme a biosynthetic process(GO:0006784);biological_process:heme a biosynthetic process(GO:0006784);biological_process:respiratory chain complex IV assembly(GO:0008535);cellular_component:membrane(GO:0016020);cellular_component:integral component of membrane(G…
ENSDART00000109883	ENSDARG00000079111	25:13936444-14029098	22.0806	8.6054	-1.35947	-5.63795	5e-05	0.000238134	Down	zgc:86725	_	molecular_function:nucleotide binding(GO:0000166);molecular_function:ATP binding(GO:0005524)
ENSDART00000109886	ENSDARG00000078435	21:24499627-24500456	19.3077	9.22965	-1.06482	-2.64222	0.00115	0.00432461	Down	anapc13	K12456	_
ENSDART00000109894	ENSDARG00000077847	3:53758075-53982893	5.76259	11.5359	1.00134	7.35947	5e-05	0.000238134	Ups	olfm2a	_	biological_process:neural crest cell development(GO:0014032)
ENSDART00000109918	ENSDARG00000076348	7:41477390-41578440	3.44465	1.64354	-1.06755	-5.38759	5e-05	0.000238134	Down	mylk3	K00907	molecular_function:nucleotide binding(GO:0000166);biological_process:heart morphogenesis(GO:0003007);molecular_function:protein kinase activity(GO:0004672);molecular_function:protein serine/threonine kinase activity(GO:0004674);molecular_function:myosin light chain kinase activity(GO:0004687);molecular_function:ATP binding(GO:0005524);cellular_component:cytoplasm(GO:0005737);biological_process:pr…
ENSDART00000110011	ENSDARG00000079167	24:26225652-26284643	0.777619	1.88206	1.27517	3.14087	0.0001	0.000458341	Ups	si:ch211-230g15.5	_	_
ENSDART00000110026	ENSDARG00000079280	1:32651141-32753395	0.566522	1.42629	1.33207	3.04688	0.00055	0.00220876	Ups	dhrsx	K11170	molecular_function:oxidoreductase activity(GO:0016491)
ENSDART00000110040	ENSDARG00000077811	17:35930938-35934236	41.1897	93.1631	1.17747	15.8672	5e-05	0.000238134	Ups	sox11a	K09268	biological_process:lens development in camera-type eye(GO:0002088);molecular_function:sequence-specific DNA binding transcription factor activity(GO:0003700);biological_process:brain development(GO:0007420);biological_process:negative regulation of smoothened signaling pathway(GO:0045879);biological_process:retinal rod cell development(GO:0046548);biological_process:camera-type eye morphogenesis(…
ENSDART00000110061	ENSDARG00000075393	13:29924670-30001389	6.43769	14.4814	1.16958	5.75992	5e-05	0.000238134	Ups	spock2	K08136	molecular_function:calcium ion binding(GO:0005509);cellular_component:proteinaceous extracellular matrix(GO:0005578);biological_process:signal transduction(GO:0007165)
ENSDART00000110136	ENSDARG00000075189	22:13438206-13526348	0.245788	0.699164	1.50822	3.46483	0.0001	0.000458341	Ups	cntnap5b	_	cellular_component:membrane(GO:0016020);cellular_component:integral component of membrane(GO:0016021)
ENSDART00000110154	ENSDARG00000079779	1:7163651-7210144	0.177735	0.817876	2.20215	3.63609	0.00065	0.00256625	Ups	radil	_	biological_process:neural crest cell migration(GO:0001755);cellular_component:cellular_component(GO:0005575);biological_process:cell adhesion(GO:0007155);biological_process:signal transduction(GO:0007165);biological_process:multicellular organismal development(GO:0007275)
ENSDART00000110200	ENSDARG00000042094	22:20110416-20130342	4.9859	0.969903	-2.36194	-8.26192	5e-05	0.000238134	Down	eef2a.1	_	molecular_function:translation elongation factor activity(GO:0003746);molecular_function:GTPase activity(GO:0003924);molecular_function:GTPase activity(GO:0003924);molecular_function:GTP binding(GO:0005525);cellular_component:intracellular(GO:0005622);biological_process:translation(GO:0006412);biological_process:translation(GO:0006412);biological_process:translational elongation(GO:0006414)
ENSDART00000110261	ENSDARG00000075417	4:70873684-70894457	0.895835	1.89808	1.08324	1.91266	0.01115	0.0321942	Ups	zgc:175107	_	molecular_function:nucleic acid binding(GO:0003676);biological_process:biological_process(GO:0008150);molecular_function:metal ion binding(GO:0046872)
ENSDART00000110293	ENSDARG00000077903	22:26653861-26664323	1.70442	0.73896	-1.20571	-2.31053	0.0043	0.0139112	Down	zgc:194551	_	molecular_function:alpha-1,6-mannosyltransferase activity(GO:0000009);molecular_function:alpha-1,2-mannosyltransferase activity(GO:0000026);molecular_function:mannosyltransferase activity(GO:0000030);molecular_function:alpha-1,3-mannosyltransferase activity(GO:0000033);cellular_component:Golgi membrane(GO:0000139);molecular_function:alpha-1,3-galactosyltransferase activity(GO:0001962);molecular_f…
ENSDART00000110364	ENSDARG00000073773	8:45373418-45408308	4.49478	1.94558	-1.20805	-4.75719	5e-05	0.000238134	Down	tti2	_	_
ENSDART00000110381	ENSDARG00000077799	23:45825338-45871231	1.01282	0.378786	-1.41892	-2.20071	0.0032	0.0106982	Down	egr4	_	molecular_function:nucleic acid binding(GO:0003676);molecular_function:metal ion binding(GO:0046872)
ENSDART00000110443	ENSDARG00000057992	10:9134643-9143264	1.64859	5.49064	1.73574	6.36252	5e-05	0.000238134	Ups	fstb	_	cellular_component:cellular_component(GO:0005575);biological_process:biological_process(GO:0008150)
ENSDART00000110458	ENSDARG00000079252	12:9811632-9838233	1.26281	0.514492	-1.29542	-3.16822	0.0004	0.00165256	Down	fam117ab	_	molecular_function:molecular_function(GO:0003674);cellular_component:cytoplasm(GO:0005737);biological_process:biological_process(GO:0008150)
ENSDART00000110522	ENSDARG00000075295	23:5529819-5559815	0.353524	0.972614	1.46006	2.62316	0.00175	0.00629037	Ups	tulp1a	_	cellular_component:cilium(GO:0005929);biological_process:phagocytosis(GO:0006909);molecular_function:phosphatidylinositol binding(GO:0035091);molecular_function:actin filament binding(GO:0051015);biological_process:receptor localization to nonmotile primary cilium(GO:0097500);biological_process:protein localization to photoreceptor outer segment(GO:1903546)
ENSDART00000110550	ENSDARG00000016981	8:15045875-15192353	1.48807	3.72372	1.3233	4.24718	5e-05	0.000238134	Ups	bcar3	_	molecular_function:SH3/SH2 adaptor activity(GO:0005070);molecular_function:guanyl-nucleotide exchange factor activity(GO:0005085);biological_process:signal transduction(GO:0007165);biological_process:signal transduction(GO:0007165);biological_process:small GTPase mediated signal transduction(GO:0007264)
ENSDART00000110590	ENSDARG00000098810	7:44698379-44820358	0.478824	1.96964	2.04036	2.22111	0.0017	0.00612981	Ups	VSTM2B	_	_
ENSDART00000110656	ENSDARG00000091148	9:22316748-22528713	155.531	376.644	1.276	10.6287	5e-05	0.000238134	Ups	crygm2d20	_	molecular_function:molecular_function(GO:0003674);cellular_component:cellular_component(GO:0005575);biological_process:biological_process(GO:0008150)
ENSDART00000110690	ENSDARG00000087345	1:55990641-55992780	1.09392	2.52989	1.20957	4.23479	5e-05	0.000238134	Ups	CABZ01059415.2	_	_
ENSDART00000110903	ENSDARG00000079233	17:27225055-27247662	11.3476	4.7216	-1.26504	-10.8819	5e-05	0.000238134	Down	E2F2	K09389	molecular_function:DNA binding(GO:0003677);molecular_function:sequence-specific DNA binding transcription factor activity(GO:0003700);cellular_component:nucleus(GO:0005634);cellular_component:transcription factor complex(GO:0005667);biological_process:transcription, DNA-templated(GO:0006351);biological_process:regulation of transcription, DNA-templated(GO:0006355);molecular_function:protein dimer…
ENSDART00000110941	ENSDARG00000087301	9:22316748-22528713	47.0372	187.885	1.99797	8.56123	5e-05	0.000238134	Ups	crygm2d14	_	molecular_function:molecular_function(GO:0003674);cellular_component:cellular_component(GO:0005575);biological_process:biological_process(GO:0008150)
ENSDART00000110996	ENSDARG00000078864	9:21466957-21491659	4.50645	1.8657	-1.27228	-5.90523	5e-05	0.000238134	Down	lats2	_	biological_process:G1/S transition of mitotic cell cycle(GO:0000082);cellular_component:spindle pole(GO:0000922);molecular_function:protein kinase activity(GO:0004672);molecular_function:protein serine/threonine kinase activity(GO:0004674);molecular_function:protein serine/threonine kinase activity(GO:0004674);molecular_function:ATP binding(GO:0005524);cellular_component:nucleus(GO:0005634);biolo…
ENSDART00000111022	ENSDARG00000009123	20:34045762-34074289	2.6557	0.529809	-2.32555	-4.80105	5e-05	0.000238134	Down	sele	_	biological_process:cell adhesion(GO:0007155);cellular_component:membrane(GO:0016020);cellular_component:integral component of membrane(GO:0016021)
ENSDART00000111038	ENSDARG00000077219	2:31631314-31642991	1.841	0.327926	-2.48905	-6.63873	5e-05	0.000238134	Down	PLXDC2 (1 of many)	_	cellular_component:membrane(GO:0016020);cellular_component:integral component of membrane(GO:0016021)
ENSDART00000111052	ENSDARG00000074253	13:969905-1403357	9.80922	3.98382	-1.29998	-5.57348	5e-05	0.000238134	Down	olig3	_	_
ENSDART00000111097	ENSDARG00000076858	10:20299072-20299794	15.8	6.39794	-1.30425	-5.68054	5e-05	0.000238134	Down	CR381599.1	_	_
ENSDART00000111109	ENSDARG00000073750	9:22316748-22528713	54.094	136.413	1.33445	9.34803	5e-05	0.000238134	Ups	crygm2d9	_	_
ENSDART00000111135	ENSDARG00000020794	2:50892278-50894921	6.09853	15.5539	1.35074	9.52916	5e-05	0.000238134	Ups	neurod6b	_	molecular_function:DNA binding(GO:0003677);cellular_component:nucleus(GO:0005634);biological_process:transcription, DNA-templated(GO:0006351);biological_process:regulation of transcription, DNA-templated(GO:0006355);biological_process:multicellular organismal development(GO:0007275);biological_process:nervous system development(GO:0007399);biological_process:cell differentiation(GO:0030154);molec…
ENSDART00000111141	ENSDARG00000067701	14:905538-915206	15.2484	1.77126	-3.10581	-11.1173	5e-05	0.000238134	Down	myoz3a	_	molecular_function:actin binding(GO:0003779);cellular_component:actin cytoskeleton(GO:0015629);cellular_component:Z disc(GO:0030018);biological_process:myofibril assembly(GO:0030239);molecular_function:telethonin binding(GO:0031433);molecular_function:FATZ binding(GO:0051373)
ENSDART00000111282	ENSDARG00000077174	5:63596316-63634334	9.88982	4.53961	-1.12338	-13.5159	5e-05	0.000238134	Down	QSOX2	K10758	_
ENSDART00000111301	ENSDARG00000068247	18:37855951-38107091	0.965247	2.09425	1.11746	2.92204	0.0002	0.000872038	Ups	luzp2	_	cellular_component:extracellular region(GO:0005576)
ENSDART00000111383	ENSDARG00000077775	16:52885413-52892541	0.486691	1.27494	1.38935	3.34465	0.00025	0.00107263	Ups	zgc:193681	_	molecular_function:molecular_function(GO:0003674);cellular_component:cytoplasm(GO:0005737);biological_process:biological_process(GO:0008150)
ENSDART00000111477	ENSDARG00000074588	13:31259862-31262419	4.4108	2.1304	-1.04991	-3.22828	5e-05	0.000238134	Down	METTL18	_	molecular_function:methyltransferase activity(GO:0008168)
ENSDART00000111506	ENSDARG00000074308	8:40047552-40131308	2.41798	5.64525	1.22323	7.74078	5e-05	0.000238134	Ups	lrrc75ba	_	_
ENSDART00000111641	ENSDARG00000039062	13:40620390-40628609	1.36653	3.72903	1.44828	6.5773	5e-05	0.000238134	Ups	morn4	_	molecular_function:molecular_function(GO:0003674);cellular_component:cellular_component(GO:0005575);biological_process:biological_process(GO:0008150)
ENSDART00000111767	ENSDARG00000075881	18:25766059-25785021	6.54529	2.42975	-1.42965	-2.98192	0.0001	0.000458341	Down	si:ch211-39k3.2	_	_
ENSDART00000111941	ENSDARG00000076442	4:75673765-75732453	1.23302	0.4281	-1.52618	-2.13201	0.00865	0.0257386	Down	znf971	_	molecular_function:nucleic acid binding(GO:0003676);biological_process:biological_process(GO:0008150);molecular_function:metal ion binding(GO:0046872)
ENSDART00000112068	ENSDARG00000075161	21:21705167-21706355	12.4233	45.7334	1.8802	13.6149	5e-05	0.000238134	Ups	defbl1	_	cellular_component:extracellular region(GO:0005576);biological_process:defense response(GO:0006952);biological_process:defense response to bacterium(GO:0042742);biological_process:innate immune response(GO:0045087)
ENSDART00000112109	ENSDARG00000075833	7:66598580-66610393	1.24191	3.26834	1.39599	3.89605	5e-05	0.000238134	Ups	lyve1a	K19012	biological_process:lymphangiogenesis(GO:0001946);molecular_function:hyaluronic acid binding(GO:0005540);molecular_function:hyaluronic acid binding(GO:0005540);biological_process:cell adhesion(GO:0007155);cellular_component:membrane(GO:0016020);cellular_component:integral component of membrane(GO:0016021)
ENSDART00000112116	ENSDARG00000074656	16:29574509-29578811	21.5882	3.27261	-2.72173	-13.132	5e-05	0.000238134	Down	ctss2.1	K01368	molecular_function:cysteine-type endopeptidase activity(GO:0004197);cellular_component:extracellular space(GO:0005615);cellular_component:lysosome(GO:0005764);biological_process:proteolysis(GO:0006508);biological_process:immune response(GO:0006955);molecular_function:peptidase activity(GO:0008233);molecular_function:cysteine-type peptidase activity(GO:0008234);molecular_function:hydrolase activit…
ENSDART00000112118	ENSDARG00000079884	6:1604029-1613964	0.349678	1.1428	1.70847	2.73916	0.00355	0.0117251	Ups	trim107	_	molecular_function:zinc ion binding(GO:0008270);molecular_function:metal ion binding(GO:0046872)
ENSDART00000112130	ENSDARG00000075299	8:1204197-1213194	2.68873	1.1735	-1.19611	-2.40081	0.0042	0.013623	Down	aaed1	_	molecular_function:antioxidant activity(GO:0016209);biological_process:oxidation-reduction process(GO:0055114)
ENSDART00000112156	ENSDARG00000074904	11:7031028-7068553	0.717152	0.271936	-1.39901	-3.47431	5e-05	0.000238134	Down	si:ch211-253b8.5	_	cellular_component:cytoplasm(GO:0005737)
ENSDART00000112192	ENSDARG00000091667	25:36639059-36645285	1.67894	0.443972	-1.91901	-3.68046	0.0001	0.000458341	Down	si:dkey-234i14.3	K17342	molecular_function:calcium ion binding(GO:0005509)
ENSDART00000112263	ENSDARG00000079377	1:25717781-25744106	2.87472	1.1631	-1.30545	-5.54353	5e-05	0.000238134	Down	arhgef38	K20711	molecular_function:guanyl-nucleotide exchange factor activity(GO:0005085);molecular_function:Rho guanyl-nucleotide exchange factor activity(GO:0005089);cellular_component:cytoplasm(GO:0005737);biological_process:regulation of Rho protein signal transduction(GO:0035023);biological_process:intracellular signal transduction(GO:0035556)
ENSDART00000112317	ENSDARG00000074696	24:26225652-26284643	1.62711	0.566082	-1.52323	-2.23398	0.0053	0.0167118	Down	zgc:194621	_	molecular_function:molecular_function(GO:0003674);cellular_component:cellular_component(GO:0005575);biological_process:biological_process(GO:0008150)
ENSDART00000112364	ENSDARG00000078557	19:41966279-42012607	27.8721	2.72772	-3.35305	-21.3073	5e-05	0.000238134	Down	si:ch211-57n23.4	_	cellular_component:membrane(GO:0016020);cellular_component:integral component of membrane(GO:0016021)
ENSDART00000112377	ENSDARG00000075727	14:46419006-46435486	32.1298	3.28801	-3.28862	-7.66556	5e-05	0.000238134	Down	map1lc3cl	_	biological_process:autophagosome assembly(GO:0000045);cellular_component:autophagosome membrane(GO:0000421);biological_process:mitochondrion degradation(GO:0000422);cellular_component:cytosol(GO:0005829);biological_process:autophagy(GO:0006914);biological_process:cellular response to nitrogen starvation(GO:0006995);molecular_function:microtubule binding(GO:0008017)
ENSDART00000112381	ENSDARG00000078052	8:22941251-22943975	1.39158	10.2052	2.87451	11.1124	5e-05	0.000238134	Ups	emilin3a	_	biological_process:regulation of smoothened signaling pathway(GO:0008589);cellular_component:extracellular matrix(GO:0031012);biological_process:notochord morphogenesis(GO:0048570);biological_process:muscle fiber development(GO:0048747)
ENSDART00000112433	ENSDARG00000002259	12:4283382-4309427	0.37153	1.422	1.93637	2.61631	0.00145	0.00531371	Ups	ca15c	_	molecular_function:carbonate dehydratase activity(GO:0004089);cellular_component:cellular_component(GO:0005575);biological_process:one-carbon metabolic process(GO:0006730);molecular_function:zinc ion binding(GO:0008270);molecular_function:metal ion binding(GO:0046872)
ENSDART00000112460	ENSDARG00000076991	21:4369590-4375334	0.855608	1.73259	1.01791	2.83479	0.0005	0.00202494	Ups	dolk	K00902	cellular_component:membrane(GO:0016020);cellular_component:integral component of membrane(GO:0016021)
ENSDART00000112483	ENSDARG00000078882	7:56125449-56305341	14.2456	6.57182	-1.11615	-7.26231	5e-05	0.000238134	Down	CR407583.1	_	_
ENSDART00000112495	ENSDARG00000079497	5:27266495-27267504	47.8252	20.3165	-1.23512	-11.9788	5e-05	0.000238134	Down	zgc:110340	_	cellular_component:cellular_component(GO:0005575);biological_process:biological_process(GO:0008150)
ENSDART00000112637	ENSDARG00000077946	6:39838937-39869134	5.46049	11.4997	1.0745	13.4053	5e-05	0.000238134	Ups	smarcc2	K11649	molecular_function:DNA binding(GO:0003677);cellular_component:nucleus(GO:0005634);biological_process:chromatin remodeling(GO:0006338);biological_process:regulation of transcription from RNA polymerase II promoter(GO:0006357);cellular_component:BAF-type complex(GO:0090544)
ENSDART00000112680	ENSDARG00000074507	24:41790491-42236180	1.9172	9.66007	2.33303	3.5815	5e-05	0.000238134	Ups	rmdn1	_	cellular_component:cellular_component(GO:0005575);biological_process:biological_process(GO:0008150)
ENSDART00000112758	ENSDARG00000077571	23:43468920-43500479	0.930079	0	-inf	-nan	5e-05	0.000238134	Down	zgc:174862	_	molecular_function:molecular_function(GO:0003674);cellular_component:cellular_component(GO:0005575);biological_process:biological_process(GO:0008150)
ENSDART00000112807	ENSDARG00000075163	5:42296536-42304152	0.569722	1.66545	1.54758	2.2711	0.0096	0.0282466	Ups	cxcl20	_	biological_process:positive regulation of leukocyte chemotaxis(GO:0002690);molecular_function:interleukin-8 receptor binding(GO:0005153);cellular_component:extracellular region(GO:0005576);cellular_component:extracellular space(GO:0005615);biological_process:inflammatory response(GO:0006954);biological_process:immune response(GO:0006955);biological_process:immune response(GO:0006955);biological_p…
ENSDART00000112946	ENSDARG00000075327	15:1928116-2079084	0.509296	1.20172	1.23852	3.61821	5e-05	0.000238134	Ups	dock10	_	molecular_function:guanyl-nucleotide exchange factor activity(GO:0005085);biological_process:small GTPase mediated signal transduction(GO:0007264)
ENSDART00000112959	ENSDARG00000075263	17:23442947-23449912	1.84039	0.42768	-2.10541	-4.22139	5e-05	0.000238134	Down	ankrd1a	_	cellular_component:sarcomere(GO:0030017);molecular_function:titin binding(GO:0031432);biological_process:muscle cell differentiation(GO:0042692)
ENSDART00000113036	ENSDARG00000076437	3:34472343-34483593	0.94651	2.04437	1.11097	2.93191	5e-05	0.000238134	Ups	zgc:163143	_	molecular_function:nucleic acid binding(GO:0003676);cellular_component:cellular_component(GO:0005575);biological_process:biological_process(GO:0008150)
ENSDART00000113068	ENSDARG00000078363	2:1615797-1643967	1.49245	0.685461	-1.12253	-3.9964	5e-05	0.000238134	Down	mcoln3a	K04994	cellular_component:membrane(GO:0016020);cellular_component:integral component of membrane(GO:0016021)
ENSDART00000113097	ENSDARG00000088140	6:34959967-34974891	6.98986	2.65843	-1.39469	-5.91954	5e-05	0.000238134	Down	hsd17b7	K13373	cellular_component:membrane(GO:0016020);cellular_component:integral component of membrane(GO:0016021)
ENSDART00000113174	ENSDARG00000076572	9:22316748-22528713	126.673	303.908	1.26252	19.6341	5e-05	0.000238134	Ups	crygm2d7	_	_
ENSDART00000113246	ENSDARG00000079387	5:26231850-26234554	1.87804	0.763281	-1.29894	-2.03389	0.00955	0.0281341	Down	si:ch211-102c2.4	_	cellular_component:membrane(GO:0016020);cellular_component:integral component of membrane(GO:0016021)
ENSDART00000113299	ENSDARG00000073845	14:7596259-7611747	2.00423	5.26142	1.3924	8.15219	5e-05	0.000238134	Ups	zgc:110843	_	biological_process:biological_process(GO:0008150);cellular_component:membrane(GO:0016020);cellular_component:integral component of membrane(GO:0016021);cellular_component:intracellular membrane-bounded organelle(GO:0043231);molecular_function:2 iron, 2 sulfur cluster binding(GO:0051537)
ENSDART00000113313	ENSDARG00000037363	7:28193600-28278342	9.87508	0.358606	-4.78332	-6.73492	5e-05	0.000238134	Down	st5	K20161	_
ENSDART00000113582	ENSDARG00000042791	10:40362816-40396293	2.36555	1.06216	-1.15517	-2.91146	5e-05	0.000238134	Down	git2b	K12487	molecular_function:GTPase activator activity(GO:0005096);cellular_component:cellular_component(GO:0005575)
ENSDART00000113583	ENSDARG00000076485	13:49943455-49975434	2.18107	0.958061	-1.18685	-6.42748	5e-05	0.000238134	Down	MYPN	_	_
ENSDART00000113723	ENSDARG00000067797	25:35048602-35067306	1.2428	0.341439	-1.8639	-3.99089	5e-05	0.000238134	Down	spi1a	_	molecular_function:sequence-specific DNA binding RNA polymerase II transcription factor activity(GO:0000981);biological_process:regulation of myeloid leukocyte differentiation(GO:0002761);molecular_function:DNA binding(GO:0003677);molecular_function:sequence-specific DNA binding transcription factor activity(GO:0003700);cellular_component:nucleus(GO:0005634);cellular_component:nucleus(GO:0005634)…
ENSDART00000113735	ENSDARG00000078546	1:28370263-28425544	1.92807	4.36694	1.17946	2.10404	0.01545	0.0427048	Ups	cars2	K01883	molecular_function:nucleotide binding(GO:0000166);molecular_function:aminoacyl-tRNA ligase activity(GO:0004812);molecular_function:cysteine-tRNA ligase activity(GO:0004817);molecular_function:cysteine-tRNA ligase activity(GO:0004817);molecular_function:ATP binding(GO:0005524);molecular_function:ATP binding(GO:0005524);cellular_component:cytosol(GO:0005829);biological_process:tRNA aminoacylation f…
ENSDART00000113789	ENSDARG00000076221	3:31973460-31974958	3.223	16.4867	2.35482	9.00357	5e-05	0.000238134	Ups	zgc:198419	_	molecular_function:iron ion binding(GO:0005506);cellular_component:cytoplasm(GO:0005737);biological_process:iron ion transport(GO:0006826);biological_process:cellular iron ion homeostasis(GO:0006879);biological_process:intracellular sequestering of iron ion(GO:0006880);molecular_function:ferric iron binding(GO:0008199);molecular_function:metal ion binding(GO:0046872)
ENSDART00000113803	ENSDARG00000076857	8:46651082-46652325	2.88048	0.959383	-1.58613	-3.18779	0.0006	0.00238787	Down	her3	K09088	molecular_function:DNA binding(GO:0003677);molecular_function:DNA binding(GO:0003677);cellular_component:nucleus(GO:0005634);biological_process:transcription, DNA-templated(GO:0006351);biological_process:regulation of transcription, DNA-templated(GO:0006355);biological_process:negative regulation of transcription, DNA-templated(GO:0045892);molecular_function:protein dimerization activity(GO:00469…
ENSDART00000113829	ENSDARG00000076659	19:2638265-2651974	38.914	18.8518	-1.04559	-12.9928	5e-05	0.000238134	Down	cdca7b	_	cellular_component:nucleus(GO:0005634);biological_process:regulation of transcription, DNA-templated(GO:0006355);molecular_function:zinc ion binding(GO:0008270);biological_process:positive regulation of cell proliferation(GO:0008284)
ENSDART00000113842	ENSDARG00000079216	7:34996576-35010620	0.867418	0.328121	-1.4025	-2.2929	0.01305	0.0368798	Down	dpep2	K01273	biological_process:developmental growth(GO:0048589)
ENSDART00000113849	ENSDARG00000074131	2:43805216-43886561	5.74207	2.43193	-1.23947	-5.49219	5e-05	0.000238134	Down	kif5ba	K10396	molecular_function:nucleotide binding(GO:0000166);molecular_function:microtubule motor activity(GO:0003777);molecular_function:protein binding(GO:0005515);molecular_function:ATP binding(GO:0005524);cellular_component:kinesin complex(GO:0005871);cellular_component:microtubule(GO:0005874);biological_process:microtubule-based movement(GO:0007018);biological_process:microtubule-based movement(GO:0007…
ENSDART00000113910	ENSDARG00000075188	8:20266283-20357961	1.10706	2.40142	1.11715	3.27313	5e-05	0.000238134	Ups	adamts10	K08625	molecular_function:metalloendopeptidase activity(GO:0004222);cellular_component:proteinaceous extracellular matrix(GO:0005578);biological_process:proteolysis(GO:0006508);molecular_function:peptidase activity(GO:0008233);molecular_function:metallopeptidase activity(GO:0008237);molecular_function:zinc ion binding(GO:0008270);cellular_component:extracellular matrix(GO:0031012)
ENSDART00000114023	ENSDARG00000078674	3:33168703-33172409	45.7566	1.89428	-4.59426	-13.5189	5e-05	0.000238134	Down	hspb9	_	_
ENSDART00000114041	ENSDARG00000006487	7:33074473-33080382	20.6973	46.8394	1.17828	2.00958	0.00785	0.0236322	Ups	anp32a	K18646	cellular_component:nucleus(GO:0005634);cellular_component:nucleus(GO:0005634);cellular_component:nucleus(GO:0005634);cellular_component:cytoplasm(GO:0005737);cellular_component:endoplasmic reticulum(GO:0005783);cellular_component:endoplasmic reticulum(GO:0005783);biological_process:nucleosome assembly(GO:0006334);biological_process:nucleocytoplasmic transport(GO:0006913);biological_process:nucleo…
ENSDART00000114138	ENSDARG00000076435	5:67206375-67218144	1.3739	3.69244	1.4263	2.9871	5e-05	0.000238134	Ups	abhd10a	_	cellular_component:membrane(GO:0016020);cellular_component:integral component of membrane(GO:0016021)
ENSDART00000114169	ENSDARG00000078259	14:23951145-23953812	3.60463	1.75903	-1.03507	-2.70334	0.00085	0.00328059	Down	bnip1a	K08497	cellular_component:endoplasmic reticulum(GO:0005783);cellular_component:membrane(GO:0016020);cellular_component:integral component of membrane(GO:0016021);molecular_function:protein heterodimerization activity(GO:0046982)
ENSDART00000114314	ENSDARG00000074094	6:1959700-1988145	40.386	15.6196	-1.3705	-11.0256	5e-05	0.000238134	Down	tgm2b	K05625	molecular_function:protein-glutamine gamma-glutamyltransferase activity(GO:0003810);molecular_function:transferase activity(GO:0016740);molecular_function:transferase activity, transferring acyl groups(GO:0016746);biological_process:peptide cross-linking(GO:0018149);molecular_function:metal ion binding(GO:0046872)
ENSDART00000114322	ENSDARG00000078125	16:14139162-14169142	2.61084	6.2666	1.26317	8.96121	5e-05	0.000238134	Ups	rusc1	_	_
ENSDART00000114347	ENSDARG00000073813	6:27100238-27305208	1.93106	0.965287	-1.00036	-1.95248	0.0102	0.0297591	Down	scly	K01763	molecular_function:catalytic activity(GO:0003824);cellular_component:cellular_component(GO:0005575)
ENSDART00000114415	ENSDARG00000077760	12:48212413-48217950	15.4891	6.54281	-1.24327	-6.12987	5e-05	0.000238134	Down	ascc1	K18666	biological_process:thigmotaxis(GO:0001966);molecular_function:nucleic acid binding(GO:0003676);molecular_function:RNA binding(GO:0003723);biological_process:axonogenesis(GO:0007409);biological_process:neuromuscular junction development(GO:0007528);biological_process:myotome development(GO:0061055)
ENSDART00000114442	ENSDARG00000035895	19:29794808-29849886	0.942428	2.25802	1.2606	4.36894	5e-05	0.000238134	Ups	fndc5b	_	molecular_function:hormone activity(GO:0005179);cellular_component:extracellular region(GO:0005576);cellular_component:peroxisome(GO:0005777);cellular_component:peroxisomal membrane(GO:0005778);cellular_component:endoplasmic reticulum(GO:0005783);cellular_component:plasma membrane(GO:0005886);cellular_component:plasma membrane(GO:0005886);cellular_component:membrane(GO:0016020);cellular_component…
ENSDART00000114443	ENSDARG00000076144	3:54489466-54519018	7.44271	2.28749	-1.70206	-10.9144	5e-05	0.000238134	Down	si:ch211-74m13.3	_	molecular_function:integrin binding(GO:0005178);cellular_component:integral component of plasma membrane(GO:0005887);biological_process:cell adhesion(GO:0007155);cellular_component:membrane(GO:0016020);cellular_component:integral component of membrane(GO:0016021);biological_process:single organismal cell-cell adhesion(GO:0016337)
ENSDART00000114470	ENSDARG00000056659	17:22009369-22049638	0.939809	2.40106	1.35323	5.43899	5e-05	0.000238134	Ups	ttbk1b	K08815	molecular_function:protein kinase activity(GO:0004672);molecular_function:protein serine/threonine kinase activity(GO:0004674);molecular_function:ATP binding(GO:0005524);cellular_component:nucleus(GO:0005634);cellular_component:cytoplasm(GO:0005737);biological_process:protein phosphorylation(GO:0006468);biological_process:regulation of cell shape(GO:0008360);biological_process:peptidyl-serine pho…
ENSDART00000114502	ENSDARG00000079031	21:20684855-20696979	2.87084	1.21032	-1.24609	-3.50318	5e-05	0.000238134	Down	si:ch211-22d5.2	K16310	molecular_function:nucleotide binding(GO:0000166);molecular_function:protein kinase activity(GO:0004672);molecular_function:protein serine/threonine kinase activity(GO:0004674);molecular_function:protein serine/threonine kinase activity(GO:0004674);molecular_function:ATP binding(GO:0005524);cellular_component:nucleus(GO:0005634);cellular_component:cytoplasm(GO:0005737);biological_process:protein …
ENSDART00000114529	ENSDARG00000078935	9:14141271-14175950	2.87317	6.31111	1.13525	3.52885	5e-05	0.000238134	Ups	ttll4	_	biological_process:cellular protein modification process(GO:0006464);biological_process:protein polyglutamylation(GO:0018095)
ENSDART00000114549	ENSDARG00000076126	19:47988580-47994969	4.06143	1.92822	-1.07472	-3.68512	5e-05	0.000238134	Down	ACTC1 (1 of many)	K12314	_
ENSDART00000114568	ENSDARG00000076790	9:22316748-22528713	39.5092	158.687	2.00592	14.4853	5e-05	0.000238134	Ups	crygm2d16	_	molecular_function:molecular_function(GO:0003674);cellular_component:cellular_component(GO:0005575);biological_process:biological_process(GO:0008150)
ENSDART00000114677	ENSDARG00000078645	21:13259592-13280138	0.472689	1.80233	1.9309	2.69717	0.01035	0.0301509	Ups	si:ch73-62l21.1	K07359	_
ENSDART00000114700	ENSDARG00000074528	24:6627982-6641761	2.33055	6.41719	1.46127	3.70427	5e-05	0.000238134	Ups	PRTFDC1 (1 of many)	_	_
ENSDART00000114746	ENSDARG00000076773	1:46794871-46801729	3.49064	0.262919	-3.7308	-5.35014	0.0004	0.00165256	Down	lrrc58a	_	_
ENSDART00000114800	ENSDARG00000078155	8:23732008-23754405	17.6253	7.7224	-1.19053	-6.51334	5e-05	0.000238134	Down	si:ch211-163l21.4	_	_
ENSDART00000114814	ENSDARG00000078266	9:46038780-46043000	3.51604	8.53455	1.27936	5.78519	5e-05	0.000238134	Ups	twist2	K09069	molecular_function:protein dimerization activity(GO:0046983)
ENSDART00000114841	ENSDARG00000074581	5:13281750-13335244	2.37105	6.18179	1.3825	4.65865	5e-05	0.000238134	Ups	add2	K18622	cellular_component:cytoskeleton(GO:0005856)
ENSDART00000114877	ENSDARG00000079947	21:17243515-17259903	4.67639	1.54145	-1.6011	-4.93827	5e-05	0.000238134	Down	gfi1b	K09223	molecular_function:nucleic acid binding(GO:0003676);biological_process:regulation of transcription, DNA-templated(GO:0006355);biological_process:hemopoiesis(GO:0030097);biological_process:myeloid cell differentiation(GO:0030099);biological_process:erythrocyte differentiation(GO:0030218);molecular_function:metal ion binding(GO:0046872);biological_process:regulation of histone H3-K4 methylation(GO:…
ENSDART00000114923	ENSDARG00000079415	15:2596307-2685761	0.87302	2.00673	1.20076	2.04972	0.00845	0.0252297	Ups	dnajc30b	K19374	cellular_component:membrane(GO:0016020);cellular_component:integral component of membrane(GO:0016021)
ENSDART00000114943	ENSDARG00000087164	9:22316748-22528713	86.2045	216.234	1.32676	13.1782	5e-05	0.000238134	Ups	crygm2d4	_	molecular_function:molecular_function(GO:0003674);cellular_component:cellular_component(GO:0005575);biological_process:biological_process(GO:0008150)
ENSDART00000114981	ENSDARG00000035391	5:34653303-34664364	0.817157	1.68205	1.04154	2.36213	0.00205	0.00724013	Ups	ptcd2	K17711	molecular_function:molecular_function(GO:0003674);cellular_component:mitochondrion(GO:0005739);cellular_component:mitochondrion(GO:0005739);biological_process:mRNA processing(GO:0006397);biological_process:regulation of mRNA processing(GO:0050684)
ENSDART00000115002	ENSDARG00000095135	4:71811084-71920152	2.81919	0.617889	-2.18986	-3.06766	0.00295	0.0099644	Down	si:ch73-266f23.1	_	molecular_function:nucleic acid binding(GO:0003676);biological_process:biological_process(GO:0008150);molecular_function:metal ion binding(GO:0046872)
ENSDART00000115018	ENSDARG00000078440	6:6144035-6189388	0.216136	1.0421	2.26948	5.49414	5e-05	0.000238134	Ups	ccdc88aa	_	molecular_function:actin binding(GO:0003779);biological_process:cell migration(GO:0016477);biological_process:regulation of actin cytoskeleton organization(GO:0032956)
ENSDART00000115045	ENSDARG00000087318	7:8127066-8135474	2.15469	4.99488	1.21297	2.72742	5e-05	0.000238134	Ups	zgc:174688	_	molecular_function:molecular_function(GO:0003674);cellular_component:cellular_component(GO:0005575);biological_process:biological_process(GO:0008150)
ENSDART00000115051	ENSDARG00000078068	15:23552464-23572949	1.62271	0.538876	-1.59038	-4.2427	5e-05	0.000238134	Down	abcg4b	_	molecular_function:nucleotide binding(GO:0000166);molecular_function:ATP binding(GO:0005524);cellular_component:plasma membrane(GO:0005886);cellular_component:membrane(GO:0016020);cellular_component:integral component of membrane(GO:0016021);cellular_component:integral component of membrane(GO:0016021);molecular_function:ATPase activity(GO:0016887);molecular_function:cholesterol transporter activ…
ENSDART00000115178	ENSDARG00000076710	15:37657984-37831782	0.995875	0.281909	-1.82073	-2.13724	0.0025	0.00861658	Down	si:dkey-42l23.7	_	molecular_function:G-protein coupled receptor activity(GO:0004930);biological_process:G-protein coupled receptor signaling pathway(GO:0007186);cellular_component:membrane(GO:0016020);cellular_component:integral component of membrane(GO:0016021)
ENSDART00000115250	ENSDARG00000012314	10:38226703-38299877	3.11201	1.46044	-1.09145	-2.29047	0.00505	0.0160184	Down	usp25	K11849	biological_process:proteolysis(GO:0006508);biological_process:ubiquitin-dependent protein catabolic process(GO:0006511);molecular_function:peptidase activity(GO:0008233);biological_process:dorsal/ventral pattern formation(GO:0009953);biological_process:protein deubiquitination(GO:0016579);molecular_function:hydrolase activity(GO:0016787);molecular_function:ubiquitinyl hydrolase activity(GO:003645…
ENSDART00000115255	ENSDARG00000079742	11:10483606-10679430	0.45681	0.999043	1.12895	2.14065	0.00375	0.0123163	Ups	mcf2l2	_	molecular_function:guanyl-nucleotide exchange factor activity(GO:0005085);molecular_function:Rho guanyl-nucleotide exchange factor activity(GO:0005089);biological_process:regulation of Rho protein signal transduction(GO:0035023);biological_process:intracellular signal transduction(GO:0035556)
ENSDART00000115330	ENSDARG00000077341	23:39914945-39956244	11.8164	28.7189	1.28121	24.7436	5e-05	0.000238134	Ups	ppp1r14c	K17556	molecular_function:protein serine/threonine phosphatase inhibitor activity(GO:0004865);cellular_component:cytoplasm(GO:0005737);biological_process:regulation of protein dephosphorylation(GO:0035304);biological_process:regulation of phosphorylation(GO:0042325);biological_process:negative regulation of catalytic activity(GO:0043086)
ENSDART00000115344	ENSDARG00000076965	22:12570366-12601328	1.59512	4.78056	1.58352	5.68063	5e-05	0.000238134	Ups	cep70	K16802	biological_process:epithelial cilium movement involved in determination of left/right asymmetry(GO:0060287)
ENSDART00000115405	ENSDARG00000043571	8:12887646-12911230	1.56214	4.98368	1.67368	2.27394	0.0142	0.039708	Ups	KIF2A	_	molecular_function:nucleotide binding(GO:0000166);molecular_function:microtubule motor activity(GO:0003777);molecular_function:microtubule motor activity(GO:0003777);molecular_function:ATP binding(GO:0005524);cellular_component:kinesin complex(GO:0005871);cellular_component:microtubule(GO:0005874);biological_process:microtubule-based movement(GO:0007018);biological_process:microtubule-based movem…
ENSDART00000121449	ENSDARG00000031768	25:33364219-33484290	0.290373	1.42108	2.29101	2.5526	0.0033	0.0109954	Ups	roraa	K08532	molecular_function:DNA binding(GO:0003677);molecular_function:sequence-specific DNA binding transcription factor activity(GO:0003700);molecular_function:steroid hormone receptor activity(GO:0003707);molecular_function:ligand-activated sequence-specific DNA binding RNA polymerase II transcription factor activity(GO:0004879);cellular_component:nucleus(GO:0005634);biological_process:transcription, D…
ENSDART00000121460	ENSDARG00000054683	5:38903982-38908805	3.75113	9.03662	1.26846	9.09095	5e-05	0.000238134	Ups	prdm8b	K20797	molecular_function:nucleic acid binding(GO:0003676);biological_process:oligodendrocyte development(GO:0014003);molecular_function:metal ion binding(GO:0046872)
ENSDART00000121537	ENSDARG00000091799	11:1377152-1382648	0.880678	1.99055	1.17648	3.34489	5e-05	0.000238134	Ups	si:ch211-266k22.6	_	_
ENSDART00000121546	ENSDARG00000087292	20:1561285-1650758	17.3319	6.64805	-1.38243	-4.52001	5e-05	0.000238134	Down	si:dkey-126h10.2	_	_
ENSDART00000121562	ENSDARG00000090153	6:32732747-32860177	0.493916	1.01301	1.03631	2.2171	0.007	0.0213893	Ups	cyldl	K08601	biological_process:ubiquitin-dependent protein catabolic process(GO:0006511);biological_process:protein deubiquitination(GO:0016579);molecular_function:ubiquitinyl hydrolase activity(GO:0036459)
ENSDART00000121648	ENSDARG00000021855	16:4570392-4811289	1.15424	5.22122	2.17745	4.80191	5e-05	0.000238134	Ups	arnt	_	molecular_function:DNA binding(GO:0003677);molecular_function:sequence-specific DNA binding transcription factor activity(GO:0003700);cellular_component:nucleus(GO:0005634);cellular_component:transcription factor complex(GO:0005667);cellular_component:cytoplasm(GO:0005737);biological_process:transcription, DNA-templated(GO:0006351);biological_process:regulation of transcription, DNA-templated(GO:…
ENSDART00000121652	ENSDARG00000098389	4:71923119-71930465	0.688994	1.69579	1.29939	3.16746	0.00025	0.00107263	Ups	znf1015	_	_
ENSDART00000121665	ENSDARG00000010946	9:9205231-9250915	22.4715	7.17664	-1.64672	-3.2128	5e-05	0.000238134	Down	cbsb	K01697	molecular_function:cystathionine beta-synthase activity(GO:0004122);molecular_function:cysteine synthase activity(GO:0004124);cellular_component:cytoplasm(GO:0005737);cellular_component:cytoplasm(GO:0005737);biological_process:cysteine biosynthetic process from serine(GO:0006535);biological_process:cysteine biosynthetic process from serine(GO:0006535);biological_process:cellular amino acid biosyn…
ENSDART00000121675	ENSDARG00000012071	20:16033444-16256836	0.527737	1.72492	1.70864	2.58483	0.01235	0.0351366	Ups	angptl1a	_	biological_process:angiogenesis(GO:0001525)
ENSDART00000121718	ENSDARG00000089314	12:4698879-4767932	11.2789	26.8623	1.25196	12.61	5e-05	0.000238134	Ups	mapta	K04380	cellular_component:cytoplasm(GO:0005737);cellular_component:cytoskeleton(GO:0005856);cellular_component:microtubule(GO:0005874);molecular_function:microtubule binding(GO:0008017);molecular_function:tubulin binding(GO:0015631)
ENSDART00000121847	ENSDARG00000044820	11:27570900-27580388	3.23746	0.777137	-2.05862	-4.5437	5e-05	0.000238134	Down	cstf1	K14406	molecular_function:molecular_function(GO:0003674);biological_process:mRNA processing(GO:0006397)
ENSDART00000121936	ENSDARG00000087120	4:5839658-5854481	0.842892	2.8767	1.77099	2.37414	0.0106	0.0307918	Ups	slc5a8	_	molecular_function:transporter activity(GO:0005215);biological_process:transport(GO:0006810);cellular_component:membrane(GO:0016020);cellular_component:integral component of membrane(GO:0016021);biological_process:transmembrane transport(GO:0055085)
ENSDART00000121943	ENSDARG00000054937	7:24855471-24862696	0.232421	2.32397	3.32177	2.63081	0.0145	0.0404172	Ups	badb	K02158	cellular_component:cytoplasm(GO:0005737);cellular_component:mitochondrion(GO:0005739);biological_process:apoptotic process(GO:0006915);biological_process:positive regulation of apoptotic process(GO:0043065);biological_process:positive regulation of apoptotic process(GO:0043065);biological_process:positive regulation of apoptotic process(GO:0043065);biological_process:cellular response to ionizing…
ENSDART00000121980	ENSDARG00000090903	2:53253653-53311370	12.5195	2.73331	-2.19545	-12.1608	5e-05	0.000238134	Down	CREB3L3 (1 of many)	_	_
ENSDART00000122008	ENSDARG00000101817	4:39573152-39764287	0.862431	4.11774	2.25537	5.02108	5e-05	0.000238134	Ups	si:dkey-5i16.5	_	_
ENSDART00000122015	ENSDARG00000004177	21:15774774-15802712	8.33783	3.20969	-1.37724	-7.28314	5e-05	0.000238134	Down	fam169ab	_	_
ENSDART00000122037	ENSDARG00000014746	3:27853315-28297356	9.16997	23.3749	1.34997	11.9145	5e-05	0.000238134	Ups	rbfox1	K14946	molecular_function:nucleotide binding(GO:0000166);biological_process:regulation of alternative mRNA splicing, via spliceosome(GO:0000381);biological_process:regulation of alternative mRNA splicing, via spliceosome(GO:0000381);molecular_function:nucleic acid binding(GO:0003676);molecular_function:RNA binding(GO:0003723);molecular_function:mRNA binding(GO:0003729);cellular_component:nucleus(GO:0005…
ENSDART00000122081	ENSDARG00000060112	16:39196776-39217474	0.760607	0.35609	-1.09491	-2.29999	0.0041	0.0133317	Down	sybu	_	molecular_function:protein binding(GO:0005515);cellular_component:cellular_component(GO:0005575);molecular_function:syntaxin-1 binding(GO:0017075);molecular_function:kinesin binding(GO:0019894);biological_process:determination of dorsal identity(GO:0048263);biological_process:regulation of canonical Wnt signaling pathway(GO:0060828);biological_process:regulation of Wnt signaling pathway involved …
ENSDART00000122084	ENSDARG00000086512	5:10742927-10770835	0.264011	0.579479	1.13416	2.10854	0.00955	0.0281341	Ups	FP102464.1	_	_
ENSDART00000122098	ENSDARG00000028401	5:35994995-35997483	7.82423	15.9661	1.02899	2.54853	5e-05	0.000238134	Ups	rhogc	K07863	molecular_function:GTP binding(GO:0005525);biological_process:small GTPase mediated signal transduction(GO:0007264)
ENSDART00000122128	ENSDARG00000040192	17:45412593-45419709	1.71513	7.02064	2.03329	2.89718	0.0013	0.00482057	Ups	nenf	_	biological_process:biological_process(GO:0008150);cellular_component:endomembrane system(GO:0012505);cellular_component:membrane(GO:0016020)
ENSDART00000122138	ENSDARG00000091260	2:381298-414238	1.51456	3.25968	1.10583	4.39369	5e-05	0.000238134	Ups	mylk4a	K00907	molecular_function:nucleotide binding(GO:0000166);molecular_function:protein kinase activity(GO:0004672);molecular_function:protein serine/threonine kinase activity(GO:0004674);molecular_function:ATP binding(GO:0005524);biological_process:protein phosphorylation(GO:0006468);cellular_component:membrane(GO:0016020);cellular_component:integral component of membrane(GO:0016021);molecular_function:kin…
ENSDART00000122159	ENSDARG00000087736	15:28422146-28432513	0.503408	1.03399	1.03842	3.47296	0.0001	0.000458341	Ups	si:dkey-118k5.3	_	molecular_function:nucleotide binding(GO:0000166);molecular_function:ATP binding(GO:0005524);biological_process:regulation of apoptotic process(GO:0042981)
ENSDART00000122217	ENSDARG00000005525	1:51855223-51876018	3.04264	0.474687	-2.68027	-2.65918	0.0015	0.0054753	Down	acy3.2	K18458	cellular_component:cytoplasm(GO:0005737);cellular_component:plasma membrane(GO:0005886);biological_process:metabolic process(GO:0008152);cellular_component:membrane(GO:0016020);cellular_component:apical plasma membrane(GO:0016324);molecular_function:hydrolase activity(GO:0016787);molecular_function:hydrolase activity, acting on ester bonds(GO:0016788);molecular_function:hydrolase activity, acting…
ENSDART00000122262	ENSDARG00000077526	11:6054031-6077528	6.54126	2.87681	-1.1851	-5.67063	5e-05	0.000238134	Down	babam1	K20776	molecular_function:molecular_function(GO:0003674);cellular_component:nucleus(GO:0005634);cellular_component:cytoplasm(GO:0005737);cellular_component:cytoplasm(GO:0005737);biological_process:DNA repair(GO:0006281);biological_process:double-strand break repair(GO:0006302);biological_process:cellular response to DNA damage stimulus(GO:0006974);biological_process:cell cycle(GO:0007049);biological_pro…
ENSDART00000122288	ENSDARG00000007836	5:44054985-44243585	1340.07	611.398	-1.13212	-43.7913	5e-05	0.000238134	Down	ctsla	K01365	molecular_function:cysteine-type endopeptidase activity(GO:0004197);cellular_component:extracellular space(GO:0005615);cellular_component:lysosome(GO:0005764);biological_process:proteolysis(GO:0006508);molecular_function:peptidase activity(GO:0008233);molecular_function:cysteine-type peptidase activity(GO:0008234);molecular_function:hydrolase activity(GO:0016787);biological_process:proteolysis in…
ENSDART00000122366	ENSDARG00000087749	17:26459273-26519537	0.883253	2.07369	1.2313	5.86912	5e-05	0.000238134	Ups	ccser2a	_	_
ENSDART00000122424	ENSDARG00000101176	11:30048397-30082831	4.81925	2.22015	-1.11815	-2.7728	5e-05	0.000238134	Down	ugt1b7	_	biological_process:metabolic process(GO:0008152);biological_process:flavonoid biosynthetic process(GO:0009813);molecular_function:glucuronosyltransferase activity(GO:0015020);molecular_function:glucuronosyltransferase activity(GO:0015020);cellular_component:membrane(GO:0016020);cellular_component:integral component of membrane(GO:0016021);molecular_function:transferase activity(GO:0016740);molecu…
ENSDART00000122429	ENSDARG00000091127	23:35088768-35109472	9.21958	4.18352	-1.13998	-8.05049	5e-05	0.000238134	Down	klf15	K09210	molecular_function:nucleic acid binding(GO:0003676);molecular_function:metal ion binding(GO:0046872)
ENSDART00000122468	ENSDARG00000091679	3:7344100-7360793	0.764221	0.299929	-1.34937	-2.09274	0.0104	0.0302781	Down	CU672268.1	_	_
ENSDART00000122485	ENSDARG00000028740	14:8981668-9030587	0.53593	1.19013	1.15101	2.70689	0.0011	0.0041589	Ups	msnb	_	molecular_function:actin binding(GO:0003779);cellular_component:cytoplasm(GO:0005737);cellular_component:cytoskeleton(GO:0005856);molecular_function:cytoskeletal protein binding(GO:0008092);cellular_component:extrinsic component of membrane(GO:0019898)
ENSDART00000122506	ENSDARG00000011615	7:31567169-31628058	4.65975	1.57937	-1.56091	-6.80308	5e-05	0.000238134	Down	mybpc3	K12568	biological_process:regulation of heart rate(GO:0002027);biological_process:cardiac atrium formation(GO:0003210);biological_process:cardiac ventricle formation(GO:0003211);molecular_function:molecular_function(GO:0003674);cellular_component:cellular_component(GO:0005575);biological_process:ventricular cardiac muscle tissue morphogenesis(GO:0055010)
ENSDART00000122564	ENSDARG00000036678	7:18452845-18460287	2.92331	5.86114	1.00358	3.10748	0.0002	0.000872038	Ups	trmt10a	K15445	_
ENSDART00000122574	ENSDARG00000090468	4:6407707-6615068	2.48823	1.11966	-1.15206	-3.7284	5e-05	0.000238134	Down	ppp1r3aa	_	cellular_component:membrane(GO:0016020);cellular_component:integral component of membrane(GO:0016021)
ENSDART00000122796	ENSDARG00000071213	6:7974575-8008935	1.99329	0.465294	-2.09894	-2.61068	0.0006	0.00238787	Down	rgl3a	_	molecular_function:guanyl-nucleotide exchange factor activity(GO:0005085);biological_process:signal transduction(GO:0007165);biological_process:small GTPase mediated signal transduction(GO:0007264)
ENSDART00000122844	ENSDARG00000087687	3:10460077-10470621	1.52021	3.04756	1.00339	2.40294	0.0024	0.00831981	Ups	TMEM100	_	_
ENSDART00000123002	ENSDARG00000088390	3:14918507-14932074	1.73121	3.50608	1.01808	2.5212	0.00085	0.00328059	Ups	nme4	K00940	molecular_function:nucleotide binding(GO:0000166);molecular_function:nucleoside diphosphate kinase activity(GO:0004550);molecular_function:nucleoside diphosphate kinase activity(GO:0004550);molecular_function:ATP binding(GO:0005524);cellular_component:intracellular(GO:0005622);biological_process:purine nucleotide metabolic process(GO:0006163);biological_process:nucleoside diphosphate phosphorylat…
ENSDART00000123004	ENSDARG00000090185	25:26311375-26315051	0.890436	4.54852	2.35281	5.06855	5e-05	0.000238134	Ups	si:dkeyp-73b11.8	_	molecular_function:serine-type endopeptidase inhibitor activity(GO:0004867);cellular_component:membrane(GO:0016020);cellular_component:integral component of membrane(GO:0016021)
ENSDART00000123145	ENSDARG00000090993	14:17261920-17270814	4.71756	1.94022	-1.28182	-2.08174	0.0106	0.0307918	Down	rnf4	_	molecular_function:transcription factor binding(GO:0008134);molecular_function:zinc ion binding(GO:0008270);cellular_component:PML body(GO:0016605);molecular_function:SUMO polymer binding(GO:0032184);biological_process:negative regulation of protein sumoylation(GO:0033234);cellular_component:SUMO-targeted ubiquitin ligase complex(GO:0033768);biological_process:proteasome-mediated ubiquitin-depend…
ENSDART00000123163	ENSDARG00000087529	19:48322064-48495346	12.6945	5.89471	-1.10671	-5.73554	5e-05	0.000238134	Down	zgc:85936	_	cellular_component:integral component of nuclear inner membrane(GO:0005639);biological_process:nuclear envelope organization(GO:0006998);molecular_function:chromatin DNA binding(GO:0031490);biological_process:attachment of telomere to nuclear envelope(GO:0070197)
ENSDART00000123315	ENSDARG00000086055	12:18236207-18240548	0.0769912	0.698171	3.18082	1.89705	0.01735	0.0472208	Ups	si:dkey-7e14.3	_	molecular_function:sequence-specific DNA binding RNA polymerase II transcription factor activity(GO:0000981);molecular_function:DNA binding(GO:0003677);molecular_function:sequence-specific DNA binding transcription factor activity(GO:0003700);cellular_component:nucleus(GO:0005634);cellular_component:nucleus(GO:0005634);biological_process:transcription, DNA-templated(GO:0006351);biological_process…
ENSDART00000123352	ENSDARG00000070723	25:16675991-16686135	2.02134	60.4326	4.90194	16.7371	5e-05	0.000238134	Ups	ndufa9a	_	biological_process:response to hypoxia(GO:0001666);molecular_function:catalytic activity(GO:0003824);molecular_function:NADH dehydrogenase activity(GO:0003954);molecular_function:coenzyme binding(GO:0050662);biological_process:ubiquinone-6 biosynthetic process(GO:1901006)
ENSDART00000123360	ENSDARG00000088277	19:43060097-43082178	4.00223	1.83802	-1.12265	-5.39069	5e-05	0.000238134	Down	susd5	_	molecular_function:hyaluronic acid binding(GO:0005540);biological_process:cell adhesion(GO:0007155);cellular_component:membrane(GO:0016020);cellular_component:integral component of membrane(GO:0016021)
ENSDART00000123419	ENSDARG00000089078	21:32058406-32067354	2.06753	4.1585	1.00815	2.83981	0.0006	0.00238787	Ups	si:ch211-160j14.3	_	_
ENSDART00000123477	ENSDARG00000091627	16:21324852-21334279	1.06018	3.64753	1.78261	2.5411	0.0014	0.00515216	Ups	si:dkey-271j15.3	_	_
ENSDART00000123513	ENSDARG00000088141	3:58785149-58790211	0.0327464	0.683636	4.38382	2.55101	0.0185	0.0499205	Ups	CU570684.4	_	_
ENSDART00000123648	ENSDARG00000097170	10:21602223-21691394	5.87616	12.1021	1.04232	3.60367	5e-05	0.000238134	Ups	pcdh1a4	_	molecular_function:calcium ion binding(GO:0005509);cellular_component:plasma membrane(GO:0005886);biological_process:cell adhesion(GO:0007155);biological_process:homophilic cell adhesion via plasma membrane adhesion molecules(GO:0007156);cellular_component:membrane(GO:0016020);cellular_component:integral component of membrane(GO:0016021)
ENSDART00000123763	ENSDARG00000088823	9:22316748-22528713	6.48836	1.81708	-1.83623	-1.9363	0.01775	0.048168	Down	crygm2d3	_	_
ENSDART00000123771	ENSDARG00000023472	19:48322064-48495346	10.9799	5.06545	-1.1161	-1.63278	0.0105	0.0305414	Down	ctnnb2	_	molecular_function:signal transducer activity(GO:0004871);molecular_function:protein binding(GO:0005515);cellular_component:nucleus(GO:0005634);cellular_component:cytoplasm(GO:0005737);biological_process:dorsal/ventral pattern formation(GO:0009953);cellular_component:catenin complex(GO:0016342);molecular_function:protein phosphatase binding(GO:0019903);biological_process:adherens junction assembl…
ENSDART00000123797	ENSDARG00000087386	15:6070589-6130803	102.311	36.4833	-1.48765	-7.90813	5e-05	0.000238134	Down	pcp4b	_	molecular_function:calmodulin binding(GO:0005516)
ENSDART00000123931	ENSDARG00000003165	11:6118365-6136421	6.37028	3.07904	-1.04888	-4.92819	5e-05	0.000238134	Down	nr2f6b	K08549	molecular_function:DNA binding(GO:0003677);molecular_function:sequence-specific DNA binding transcription factor activity(GO:0003700);molecular_function:steroid hormone receptor activity(GO:0003707);molecular_function:ligand-activated sequence-specific DNA binding RNA polymerase II transcription factor activity(GO:0004879);cellular_component:nucleus(GO:0005634);biological_process:transcription, D…
ENSDART00000124038	ENSDARG00000026834	3:59659894-59690351	1.20894	3.6905	1.61008	2.66867	5e-05	0.000238134	Ups	cdr2l	_	molecular_function:molecular_function(GO:0003674);cellular_component:cellular_component(GO:0005575);biological_process:biological_process(GO:0008150)
ENSDART00000124075	ENSDARG00000087260	7:47769013-47801686	1.46567	3.61445	1.30221	4.53612	5e-05	0.000238134	Ups	MTSS1L (1 of many)	K20128	_
ENSDART00000124112	ENSDARG00000069737	1:35704908-35708274	3.1972	12.9907	2.0226	15.9635	5e-05	0.000238134	Ups	pou4f2	K09366	molecular_function:DNA binding(GO:0003677);molecular_function:sequence-specific DNA binding transcription factor activity(GO:0003700);cellular_component:nucleus(GO:0005634);biological_process:transcription, DNA-templated(GO:0006351);biological_process:regulation of transcription, DNA-templated(GO:0006355);biological_process:brain development(GO:0007420);molecular_function:sequence-specific DNA bi…
ENSDART00000124132	ENSDARG00000003991	6:14948852-14974537	0.40161	1.83867	2.1948	3.90032	5e-05	0.000238134	Ups	fhl2b	K14380	molecular_function:zinc ion binding(GO:0008270);molecular_function:metal ion binding(GO:0046872)
ENSDART00000124142	ENSDARG00000068738	13:50062546-50064795	7.51851	3.2789	-1.19723	-2.65192	0.0007	0.00274779	Down	cox5b2	_	molecular_function:cytochrome-c oxidase activity(GO:0004129);molecular_function:cytochrome-c oxidase activity(GO:0004129);cellular_component:mitochondrial envelope(GO:0005740);cellular_component:mitochondrial respiratory chain complex IV(GO:0005751);biological_process:mitochondrial electron transport, cytochrome c to oxygen(GO:0006123);biological_process:mitochondrial ATP synthesis coupled proton…
ENSDART00000124272	ENSDARG00000088687	9:22316748-22528713	164.425	447.732	1.4452	21.4607	5e-05	0.000238134	Ups	crygm2d17	_	molecular_function:molecular_function(GO:0003674);cellular_component:cellular_component(GO:0005575);biological_process:biological_process(GO:0008150)
ENSDART00000124308	ENSDARG00000090847	22:6541133-6674702	12.5518	3.19799	-1.97265	-16.7024	5e-05	0.000238134	Down	si:ch211-209l18.4	_	cellular_component:membrane(GO:0016020);cellular_component:integral component of membrane(GO:0016021)
ENSDART00000124313	ENSDARG00000031046	8:10865619-10894501	2.16213	0.620339	-1.80133	-4.12205	5e-05	0.000238134	Down	nr1h5	_	molecular_function:DNA binding(GO:0003677);molecular_function:sequence-specific DNA binding transcription factor activity(GO:0003700);molecular_function:steroid hormone receptor activity(GO:0003707);cellular_component:nucleus(GO:0005634);biological_process:transcription, DNA-templated(GO:0006351);biological_process:regulation of transcription, DNA-templated(GO:0006355);molecular_function:zinc ion…
ENSDART00000124440	ENSDARG00000086931	19:6937663-6954182	0.543239	1.63706	1.59145	3.08341	0.00085	0.00328059	Ups	CABZ01029822.1	_	_
ENSDART00000124451	ENSDARG00000105306	4:44506971-45111228	2.30086	0.933645	-1.30123	-2.2466	0.00425	0.0137665	Down	si:dkeyp-104f11.6	_	_
ENSDART00000124455	ENSDARG00000005284	12:45500291-45507532	0.923224	1.96672	1.09104	3.23519	5e-05	0.000238134	Ups	fbxl15	K10281	biological_process:G2/M transition of mitotic cell cycle(GO:0000086);molecular_function:ubiquitin-protein transferase activity(GO:0004842);cellular_component:cytoplasm(GO:0005737);cellular_component:cytoplasm(GO:0005737);biological_process:dorsal/ventral pattern formation(GO:0009953);biological_process:protein ubiquitination(GO:0016567);biological_process:protein ubiquitination(GO:0016567);cellul…
ENSDART00000124467	ENSDARG00000035622	5:15444193-15448703	3.58387	9.35318	1.38394	5.04628	5e-05	0.000238134	Ups	xbp1	K09027	molecular_function:RNA polymerase II regulatory region sequence-specific DNA binding(GO:0000977);molecular_function:sequence-specific DNA binding RNA polymerase II transcription factor activity(GO:0000981);biological_process:liver development(GO:0001889);molecular_function:sequence-specific DNA binding transcription factor activity(GO:0003700);cellular_component:nucleus(GO:0005634);biological_pro…
ENSDART00000124485	ENSDARG00000089874	14:2200810-2349164	0.377901	0.828171	1.13192	2.17059	0.0034	0.0112763	Ups	pcdh2ab8	K16493	molecular_function:calcium ion binding(GO:0005509);cellular_component:plasma membrane(GO:0005886);biological_process:cell adhesion(GO:0007155);biological_process:homophilic cell adhesion via plasma membrane adhesion molecules(GO:0007156);cellular_component:membrane(GO:0016020);cellular_component:integral component of membrane(GO:0016021)
ENSDART00000124589	ENSDARG00000090091	4:55718158-55725165	0.274037	0.630461	1.20204	3.08509	0.00025	0.00107263	Ups	si:ch211-238e22.2	_	_
ENSDART00000124661	ENSDARG00000071021	17:23661061-23689323	1.65546	3.71276	1.16526	5.84035	5e-05	0.000238134	Ups	papss2a	K13811	biological_process:sulfate assimilation(GO:0000103);biological_process:sulfate assimilation(GO:0000103);molecular_function:adenylylsulfate kinase activity(GO:0004020);molecular_function:adenylylsulfate kinase activity(GO:0004020);molecular_function:sulfate adenylyltransferase (ATP) activity(GO:0004781);molecular_function:ATP binding(GO:0005524);cellular_component:cellular_component(GO:0005575);bi…
ENSDART00000124849	ENSDARG00000058048	8:14018760-14022734	0.401993	0.897971	1.1595	1.90947	0.0087	0.0258633	Ups	ugt5e1	_	biological_process:metabolic process(GO:0008152);biological_process:flavonoid biosynthetic process(GO:0009813);molecular_function:glucuronosyltransferase activity(GO:0015020);molecular_function:glucuronosyltransferase activity(GO:0015020);cellular_component:membrane(GO:0016020);cellular_component:integral component of membrane(GO:0016021);molecular_function:transferase activity(GO:0016740);molecu…
ENSDART00000125060	ENSDARG00000086998	11:11991086-11996233	1.55817	3.33566	1.09812	5.02708	5e-05	0.000238134	Ups	NNMT	K00541	cellular_component:cellular_component(GO:0005575);molecular_function:methyltransferase activity(GO:0008168)
ENSDART00000125267	ENSDARG00000087020	24:36811033-36828418	0.878182	1.98224	1.17454	2.33541	0.00295	0.0099644	Ups	si:ch73-334d15.2	_	biological_process:intracellular protein transport(GO:0006886);biological_process:regulation of G-protein coupled receptor protein signaling pathway(GO:0008277);molecular_function:protein transporter activity(GO:0008565);cellular_component:membrane(GO:0016020);cellular_component:integral component of membrane(GO:0016021)
ENSDART00000125303	ENSDARG00000016059	9:27939770-27965887	0.119543	0.932931	2.96425	2.40281	0.0138	0.0387554	Ups	rab5b	K07888	molecular_function:GTP binding(GO:0005525);cellular_component:early endosome(GO:0005769);cellular_component:plasma membrane(GO:0005886);biological_process:small GTPase mediated signal transduction(GO:0007264);biological_process:regulation of endocytosis(GO:0030100);cellular_component:endocytic vesicle(GO:0030139)
ENSDART00000125333	ENSDARG00000041895	20:38885439-38924880	4.92591	1.15688	-2.09015	-4.79205	5e-05	0.000238134	Down	cad	_	biological_process:urea cycle(GO:0000050);biological_process:lymphangiogenesis(GO:0001946);molecular_function:catalytic activity(GO:0003824);molecular_function:aspartate carbamoyltransferase activity(GO:0004070);molecular_function:aspartate carbamoyltransferase activity(GO:0004070);molecular_function:carbamoyl-phosphate synthase (ammonia) activity(GO:0004087);molecular_function:carbamoyl-phosphat…
ENSDART00000125349	ENSDARG00000087993	21:27152791-27154509	2.08016	4.42127	1.08777	4.30371	5e-05	0.000238134	Ups	bada	_	biological_process:apoptotic process(GO:0006915)
ENSDART00000125462	ENSDARG00000013926	17:20619233-20646780	2.38067	0.760181	-1.64695	-3.71381	5e-05	0.000238134	Down	slc16a9a	K08186	molecular_function:monocarboxylic acid transmembrane transporter activity(GO:0008028);cellular_component:membrane(GO:0016020);cellular_component:integral component of membrane(GO:0016021);cellular_component:integral component of membrane(GO:0016021);biological_process:transmembrane transport(GO:0055085)
ENSDART00000125466	ENSDARG00000053774	22:38765051-38808506	1.19371	0.420043	-1.50684	-2.84584	0.00035	0.00146175	Down	alpi.2	K01077	molecular_function:catalytic activity(GO:0003824);cellular_component:cellular_component(GO:0005575);biological_process:metabolic process(GO:0008152);molecular_function:phosphatase activity(GO:0016791)
ENSDART00000125468	ENSDARG00000057437	24:26161320-26183680	4.05964	0.942287	-2.10711	-3.08267	0.0027	0.00922623	Down	apodb	K03098	molecular_function:transporter activity(GO:0005215);biological_process:transport(GO:0006810);molecular_function:lipid binding(GO:0008289)
ENSDART00000125723	ENSDARG00000068457	7:39173825-39189346	50.7421	10.6429	-2.25329	-2.20654	0.01325	0.0373899	Down	tnnt3b	K12046	cellular_component:troponin complex(GO:0005861);biological_process:regulation of muscle contraction(GO:0006937);biological_process:regulation of striated muscle contraction(GO:0006942);biological_process:myofibril assembly(GO:0030239);biological_process:sarcomere organization(GO:0045214);biological_process:sarcomere organization(GO:0045214)
ENSDART00000125754	ENSDARG00000086947	25:13060659-13092173	7.14751	1.26925	-2.49347	-7.21407	5e-05	0.000238134	Down	si:ch211-147m6.1	_	_
ENSDART00000125805	ENSDARG00000089901	8:22468829-22475063	2.28593	0	-inf	-nan	5e-05	0.000238134	Down	si:ch211-261n11.8	_	molecular_function:tumor necrosis factor-activated receptor activity(GO:0005031);cellular_component:integral component of plasma membrane(GO:0005887);biological_process:inflammatory response(GO:0006954);biological_process:immune response(GO:0006955);biological_process:multicellular organismal development(GO:0007275);cellular_component:membrane(GO:0016020);cellular_component:integral component of …
ENSDART00000125860	ENSDARG00000020606	23:36198417-36365453	2.27922	1.09674	-1.05531	-2.52788	0.0019	0.00676523	Down	nfe2	_	molecular_function:transcription regulatory region sequence-specific DNA binding(GO:0000976);molecular_function:DNA binding(GO:0003677);molecular_function:DNA binding(GO:0003677);molecular_function:sequence-specific DNA binding transcription factor activity(GO:0003700);molecular_function:sequence-specific DNA binding transcription factor activity(GO:0003700);cellular_component:nucleus(GO:0005634)…
ENSDART00000125904	ENSDARG00000089642	4:62012128-62300828	0.668549	1.72889	1.37074	2.15089	0.0053	0.0167118	Ups	BX649497.1	_	_
ENSDART00000125917	ENSDARG00000035438	5:31621601-31633709	18.6185	7.8038	-1.25449	-19.5024	5e-05	0.000238134	Down	myhc4	K10352	molecular_function:nucleotide binding(GO:0000166);molecular_function:motor activity(GO:0003774);molecular_function:actin binding(GO:0003779);molecular_function:ATP binding(GO:0005524);cellular_component:myosin complex(GO:0016459)
ENSDART00000125943	ENSDARG00000088375	4:48337864-48753889	1.67622	0.831224	-1.0119	-1.69373	0.01675	0.0457742	Down	zgc:174704	_	molecular_function:nucleic acid binding(GO:0003676);biological_process:biological_process(GO:0008150);molecular_function:metal ion binding(GO:0046872)
ENSDART00000126013	ENSDARG00000068934	13:41885314-41892978	2.30895	0.950853	-1.27995	-2.50213	0.00025	0.00107263	Down	cyp1b1	K07410	molecular_function:monooxygenase activity(GO:0004497);molecular_function:monooxygenase activity(GO:0004497);molecular_function:iron ion binding(GO:0005506);cellular_component:endoplasmic reticulum(GO:0005783);cellular_component:endoplasmic reticulum membrane(GO:0005789);biological_process:xenobiotic metabolic process(GO:0006805);biological_process:steroid metabolic process(GO:0008202);molecular_f…
ENSDART00000126097	ENSDARG00000011235	17:44130893-44139202	15.4484	40.3361	1.38462	8.35088	5e-05	0.000238134	Ups	otx2	K18490	biological_process:retinal pigment epithelium development(GO:0003406);molecular_function:DNA binding(GO:0003677);molecular_function:sequence-specific DNA binding transcription factor activity(GO:0003700);cellular_component:nucleus(GO:0005634);biological_process:regulation of transcription, DNA-templated(GO:0006355);biological_process:multicellular organismal development(GO:0007275);biological_pro…
ENSDART00000126178	ENSDARG00000052739	14:35938380-35985339	1.85954	0.737548	-1.33413	-2.60794	5e-05	0.000238134	Down	egf	K04357	molecular_function:calcium ion binding(GO:0005509);cellular_component:plasma membrane(GO:0005886);biological_process:blood circulation(GO:0008015);cellular_component:membrane(GO:0016020);cellular_component:integral component of membrane(GO:0016021);molecular_function:Wnt-protein binding(GO:0017147);molecular_function:Wnt-activated receptor activity(GO:0042813);cellular_component:receptor complex(…
ENSDART00000126273	ENSDARG00000055027	17:31679693-31695078	1.74024	3.63617	1.06313	3.10753	5e-05	0.000238134	Ups	pomt2	K00728	molecular_function:mannosyltransferase activity(GO:0000030);molecular_function:dolichyl-phosphate-mannose-protein mannosyltransferase activity(GO:0004169);cellular_component:endoplasmic reticulum membrane(GO:0005789);biological_process:protein O-linked glycosylation(GO:0006493);cellular_component:membrane(GO:0016020);cellular_component:integral component of membrane(GO:0016021);molecular_function…
ENSDART00000126314	ENSDARG00000006467	9:54117502-54126174	0.335288	2.08642	2.63755	7.75975	5e-05	0.000238134	Ups	pcdh8	K16499	molecular_function:calcium ion binding(GO:0005509);cellular_component:plasma membrane(GO:0005886);biological_process:cell adhesion(GO:0007155);biological_process:homophilic cell adhesion via plasma membrane adhesion molecules(GO:0007156);cellular_component:membrane(GO:0016020);cellular_component:integral component of membrane(GO:0016021)
ENSDART00000126325	ENSDARG00000088736	12:35741144-35799148	0.165462	0.644812	1.96238	2.14904	0.01655	0.0453009	Ups	si:ch211-250n8.1	_	_
ENSDART00000126457	ENSDARG00000086296	4:44084821-44105274	1.31724	0.163425	-3.01082	-4.26756	0.00025	0.00107263	Down	si:ch211-209p16.1	_	molecular_function:RNA polymerase II core promoter proximal region sequence-specific DNA binding(GO:0000978);molecular_function:nucleic acid binding(GO:0003676);cellular_component:nucleus(GO:0005634);biological_process:regulation of transcription, DNA-templated(GO:0006355);molecular_function:metal ion binding(GO:0046872)
ENSDART00000126470	ENSDARG00000027009	19:41274732-41311480	9.68389	19.4718	1.00773	8.73184	5e-05	0.000238134	Ups	zgc:85777	K11731	molecular_function:fatty-acyl-CoA binding(GO:0000062);molecular_function:acyl-CoA dehydrogenase activity(GO:0003995);molecular_function:acyl-CoA dehydrogenase activity(GO:0003995);cellular_component:cellular_component(GO:0005575);biological_process:metabolic process(GO:0008152);molecular_function:electron carrier activity(GO:0009055);molecular_function:oxidoreductase activity(GO:0016491);molecula…
ENSDART00000126473	ENSDARG00000089031	9:54730408-54734142	10.0992	3.98378	-1.34203	-2.60972	0.0018	0.00644912	Down	larsa	_	molecular_function:nucleotide binding(GO:0000166);molecular_function:aminoacyl-tRNA editing activity(GO:0002161);molecular_function:aminoacyl-tRNA ligase activity(GO:0004812);molecular_function:leucine-tRNA ligase activity(GO:0004823);molecular_function:ATP binding(GO:0005524);cellular_component:cytosol(GO:0005829);biological_process:tRNA aminoacylation for protein translation(GO:0006418);biologi…
ENSDART00000126541	ENSDARG00000086709	7:73622161-73622572	0.916083	0	-inf	-nan	0.0078	0.0235236	Down	zgc:173552	K11253	_
ENSDART00000126542	ENSDARG00000044541	21:26959580-26974142	17.8404	48.8206	1.45234	10.2042	5e-05	0.000238134	Ups	ppp1r14ba	_	molecular_function:protein serine/threonine phosphatase inhibitor activity(GO:0004865);cellular_component:cytoplasm(GO:0005737);biological_process:regulation of protein dephosphorylation(GO:0035304);biological_process:regulation of phosphorylation(GO:0042325);biological_process:innate immune response(GO:0045087)
ENSDART00000126587	ENSDARG00000060354	2:37244553-37260080	0.662172	3.10324	2.2285	3.60394	5e-05	0.000238134	Ups	samd7	_	_
ENSDART00000126622	ENSDARG00000088475	10:21693446-21886346	0.85922	2.06908	1.26789	3.21218	0.00015	0.000666878	Ups	pcdh1gb9	_	molecular_function:calcium ion binding(GO:0005509);cellular_component:plasma membrane(GO:0005886);biological_process:cell adhesion(GO:0007155);biological_process:homophilic cell adhesion via plasma membrane adhesion molecules(GO:0007156);cellular_component:membrane(GO:0016020);cellular_component:integral component of membrane(GO:0016021)
ENSDART00000126705	ENSDARG00000090697	16:38606803-38681937	45.5026	20.0112	-1.18514	-2.96616	5e-05	0.000238134	Down	eif3ea	K03250	biological_process:formation of translation preinitiation complex(GO:0001731);molecular_function:translation initiation factor activity(GO:0003743);molecular_function:translation initiation factor activity(GO:0003743);molecular_function:translation initiation factor activity(GO:0003743);cellular_component:nucleus(GO:0005634);cellular_component:nucleus(GO:0005634);cellular_component:cytoplasm(GO:0…
ENSDART00000126773	ENSDARG00000077126	3:31793352-31802060	0.0894528	61.4504	9.42408	8.27456	0.0098	0.0287468	Ups	snrnp70	_	molecular_function:nucleotide binding(GO:0000166);cellular_component:commitment complex(GO:0000243);biological_process:mRNA splicing, via spliceosome(GO:0000398);molecular_function:nucleic acid binding(GO:0003676);molecular_function:mRNA binding(GO:0003729);cellular_component:U1 snRNP(GO:0005685);cellular_component:virion(GO:0019012);cellular_component:viral nucleocapsid(GO:0019013);cellular_comp…
ENSDART00000126777	ENSDARG00000067507	14:5630161-5697946	0.137948	0.561742	2.02578	5.69409	5e-05	0.000238134	Ups	kctd8	_	biological_process:transport(GO:0006810);biological_process:ion transport(GO:0006811);biological_process:protein homooligomerization(GO:0051260)
ENSDART00000126780	ENSDARG00000036282	13:9714610-9752591	2.04198	6.42672	1.65411	4.47157	5e-05	0.000238134	Ups	rnaset2	K01166	molecular_function:RNA binding(GO:0003723);molecular_function:nuclease activity(GO:0004518);molecular_function:endonuclease activity(GO:0004519);cellular_component:extracellular region(GO:0005576);cellular_component:lysosome(GO:0005764);cellular_component:endoplasmic reticulum(GO:0005783);cellular_component:endoplasmic reticulum lumen(GO:0005788);biological_process:rRNA catabolic process(GO:00160…
ENSDART00000126835	ENSDARG00000012460	13:30534368-30570010	0.739753	1.88144	1.34672	3.60084	5e-05	0.000238134	Ups	rassf4	K09851	molecular_function:molecular_function(GO:0003674);cellular_component:cellular_component(GO:0005575);biological_process:signal transduction(GO:0007165)
ENSDART00000126937	ENSDARG00000089361	10:2559634-2568132	1.07219	5.17693	2.27154	5.84436	5e-05	0.000238134	Ups	wu:fb59d01	_	molecular_function:serine-type endopeptidase inhibitor activity(GO:0004867);cellular_component:extracellular region(GO:0005576);biological_process:blood coagulation(GO:0007596);biological_process:negative regulation of peptidase activity(GO:0010466);cellular_component:membrane(GO:0016020);cellular_component:integral component of membrane(GO:0016021);molecular_function:peptidase inhibitor activity…
ENSDART00000126982	ENSDARG00000089382	5:825788-827000	267.108	546.985	1.03408	39.8465	5e-05	0.000238134	Ups	zgc:158463	_	molecular_function:molecular_function(GO:0003674);cellular_component:cellular_component(GO:0005575);biological_process:biological_process(GO:0008150)
ENSDART00000127007	ENSDARG00000008454	7:47967930-47978459	0.681414	0.225119	-1.59785	-3.0584	0.00045	0.00184244	Down	cpeb1b	K02602	molecular_function:nucleotide binding(GO:0000166);molecular_function:translation repressor activity, nucleic acid binding(GO:0000900);molecular_function:translation repressor activity, nucleic acid binding(GO:0000900);molecular_function:nucleic acid binding(GO:0003676);molecular_function:RNA binding(GO:0003723);molecular_function:RNA binding(GO:0003723);molecular_function:mRNA 3'-UTR binding(GO:0…
ENSDART00000127085	ENSDARG00000090844	9:53434189-53459369	0.744995	0.153772	-2.27644	-2.8688	0.009	0.0266641	Down	CABZ01054965.1	_	_
ENSDART00000127099	ENSDARG00000045904	25:22177093-22181107	1.74623	11.308	2.69503	12.9558	5e-05	0.000238134	Ups	nr2e3	K08546	molecular_function:DNA binding(GO:0003677);molecular_function:sequence-specific DNA binding transcription factor activity(GO:0003700);molecular_function:steroid hormone receptor activity(GO:0003707);molecular_function:ligand-activated sequence-specific DNA binding RNA polymerase II transcription factor activity(GO:0004879);cellular_component:nucleus(GO:0005634);cellular_component:nucleus(GO:00056…
ENSDART00000127136	ENSDARG00000086104	2:42533042-42547178	3.01476	8.24851	1.45209	12.1526	5e-05	0.000238134	Ups	slco5a2	_	molecular_function:transporter activity(GO:0005215);cellular_component:integral component of plasma membrane(GO:0005887);biological_process:transport(GO:0006810);biological_process:ion transport(GO:0006811);molecular_function:sodium-independent organic anion transmembrane transporter activity(GO:0015347);cellular_component:membrane(GO:0016020);cellular_component:integral component of membrane(GO:…
ENSDART00000127207	ENSDARG00000016771	2:17112043-17123598	129.217	57.1293	-1.17749	-2.72641	5e-05	0.000238134	Down	tfa	_	cellular_component:extracellular region(GO:0005576);cellular_component:extracellular space(GO:0005615);biological_process:transport(GO:0006810);biological_process:ion transport(GO:0006811);biological_process:iron ion transport(GO:0006826);biological_process:response to bacterium(GO:0009617);biological_process:hemoglobin biosynthetic process(GO:0042541);molecular_function:metal ion binding(GO:0046…
ENSDART00000127219	ENSDARG00000086224	9:5518380-5618168	0.703785	1.45693	1.04973	1.93478	0.015	0.0416171	Ups	FAM155A (1 of many)	_	_
ENSDART00000127225	ENSDARG00000087625	17:52503649-52509632	0.543022	1.55347	1.51641	3.14313	0.0004	0.00165256	Ups	OLFM4 (1 of many)	_	_
ENSDART00000127261	ENSDARG00000021239	4:17854737-18212788	1.21641	2.48666	1.03158	4.28526	5e-05	0.000238134	Ups	apaf1	K02084	molecular_function:nucleotide binding(GO:0000166);molecular_function:ATP binding(GO:0005524);cellular_component:cytoplasm(GO:0005737);biological_process:proteolysis(GO:0006508);biological_process:apoptotic process(GO:0006915);molecular_function:peptidase activity(GO:0008233);biological_process:activation of cysteine-type endopeptidase activity involved in apoptotic process by cytochrome c(GO:0008…
ENSDART00000127436	ENSDARG00000004141	15:15479600-15501508	2.62206	5.47868	1.06313	4.58036	5e-05	0.000238134	Ups	zgc:92630	_	cellular_component:cellular_component(GO:0005575)
ENSDART00000127513	ENSDARG00000086162	16:49504724-49673101	0.637459	1.66755	1.38732	3.64315	5e-05	0.000238134	Ups	znf385d	_	molecular_function:p53 binding(GO:0002039);molecular_function:nucleic acid binding(GO:0003676);molecular_function:RNA binding(GO:0003723);molecular_function:zinc ion binding(GO:0008270);molecular_function:metal ion binding(GO:0046872);biological_process:intrinsic apoptotic signaling pathway by p53 class mediator(GO:0072332)
ENSDART00000127681	ENSDARG00000089889	16:46467140-46468322	0.700714	1.46939	1.06832	2.07667	0.0091	0.0269299	Ups	CU861453.1	_	_
ENSDART00000127819	ENSDARG00000069375	15:21939812-21942264	5.02704	1.60173	-1.65008	-3.72766	5e-05	0.000238134	Down	zgc:162608	_	biological_process:cholesterol biosynthetic process(GO:0006695);biological_process:positive regulation of cholesterol esterification(GO:0010873);biological_process:positive regulation of triglyceride catabolic process(GO:0010898);molecular_function:cholesterol binding(GO:0015485);molecular_function:cholesterol transporter activity(GO:0017127);biological_process:triglyceride catabolic process(GO:0…
ENSDART00000127836	ENSDARG00000088411	6:10708589-10728460	5.37257	2.57669	-1.0601	-3.12779	5e-05	0.000238134	Down	notum2	_	molecular_function:phospholipase activity(GO:0004620);cellular_component:extracellular region(GO:0005576);biological_process:motor neuron axon guidance(GO:0008045);molecular_function:prenylcysteine methylesterase activity(GO:0010296);molecular_function:lipase activity(GO:0016298);molecular_function:hydrolase activity(GO:0016787);molecular_function:1-oxa-2-oxocycloheptane lactonase activity(GO:001…
ENSDART00000127854	ENSDARG00000068214	21:5673970-5692282	3.05404	7.04288	1.20545	2.49423	5e-05	0.000238134	Ups	ccni	_	molecular_function:molecular_function(GO:0003674);cellular_component:cellular_component(GO:0005575);biological_process:regulation of cell cycle(GO:0051726)
ENSDART00000127870	ENSDARG00000055527	12:13080236-13138615	39.2205	14.7348	-1.41238	-3.71292	5e-05	0.000238134	Down	cmn	_	cellular_component:extracellular matrix(GO:0031012)
ENSDART00000127971	ENSDARG00000090876	3:3090905-3114759	0.723638	0.23413	-1.62796	-3.04879	0.00055	0.00220876	Down	TMEM184B (1 of many)	_	cellular_component:membrane(GO:0016020);cellular_component:integral component of membrane(GO:0016021)
ENSDART00000127975	ENSDARG00000046081	20:7596471-7605367	13.8675	6.85077	-1.01737	-3.87857	5e-05	0.000238134	Down	bloc1s2	K16750	_
ENSDART00000128024	ENSDARG00000090418	6:11771215-11798468	0.717514	1.99288	1.47378	2.29098	0.0014	0.00515216	Ups	wdsub1	_	molecular_function:ubiquitin-protein transferase activity(GO:0004842);biological_process:protein ubiquitination(GO:0016567)
ENSDART00000128226	ENSDARG00000087981	11:1065327-1104981	3.94666	8.17067	1.04982	7.19516	5e-05	0.000238134	Ups	slc6a11b	_	molecular_function:neurotransmitter:sodium symporter activity(GO:0005328);biological_process:transport(GO:0006810);biological_process:neurotransmitter transport(GO:0006836);molecular_function:symporter activity(GO:0015293);cellular_component:membrane(GO:0016020);cellular_component:integral component of membrane(GO:0016021)
ENSDART00000128295	ENSDARG00000086744	22:1484667-2854042	0.854385	2.12202	1.31248	2.36606	0.00335	0.0111323	Ups	znf1152	_	_
ENSDART00000128308	ENSDARG00000010194	6:39067287-39083165	7.18516	2.80898	-1.35497	-5.25357	5e-05	0.000238134	Down	eif4bb	K03258	molecular_function:nucleotide binding(GO:0000166);biological_process:formation of translation preinitiation complex(GO:0001731);biological_process:cytoplasmic translation(GO:0002181);molecular_function:nucleic acid binding(GO:0003676);molecular_function:RNA binding(GO:0003723);molecular_function:translation initiation factor activity(GO:0003743);molecular_function:translation initiation factor ac…
ENSDART00000128380	ENSDARG00000090689	3:54859450-54884525	483.767	986.237	1.02762	9.79687	5e-05	0.000238134	Ups	hbbe1.2	_	_
ENSDART00000128442	ENSDARG00000070165	11:40167483-40193180	1.33175	0.241152	-2.46531	-4.77402	5e-05	0.000238134	Down	tnfrsf1b	K05141	biological_process:vasculature development(GO:0001944);molecular_function:tumor necrosis factor-activated receptor activity(GO:0005031);cellular_component:nucleus(GO:0005634);cellular_component:integral component of plasma membrane(GO:0005887);biological_process:inflammatory response(GO:0006954);biological_process:immune response(GO:0006955);biological_process:brain development(GO:0007420);biolog…
ENSDART00000128556	ENSDARG00000039934	10:53586-59125	2.45326	1.20586	-1.02463	-1.78588	0.01445	0.0402895	Down	hlcs	K01942	molecular_function:biotin-[acetyl-CoA-carboxylase] ligase activity(GO:0004077);biological_process:cellular protein modification process(GO:0006464)
ENSDART00000128588	ENSDARG00000019572	14:40485242-40506848	30.235	11.1143	-1.4438	-8.09391	5e-05	0.000238134	Down	taf7	K03132	molecular_function:transcription coactivator activity(GO:0003713);cellular_component:transcription factor TFIID complex(GO:0005669);cellular_component:transcription factor TFIID complex(GO:0005669);biological_process:regulation of transcription from RNA polymerase II promoter(GO:0006357);biological_process:transcription initiation from RNA polymerase II promoter(GO:0006367);molecular_function:tra…
ENSDART00000128700	ENSDARG00000086724	6:47485065-47507826	0.763548	2.07775	1.44423	3.61856	5e-05	0.000238134	Ups	im:7151449	_	biological_process:angiogenesis(GO:0001525);molecular_function:molecular_function(GO:0003674);cellular_component:membrane(GO:0016020);cellular_component:integral component of membrane(GO:0016021);biological_process:single organismal cell-cell adhesion(GO:0016337);biological_process:cell motility(GO:0048870)
ENSDART00000128937	ENSDARG00000058159	4:9359780-9388443	1.80973	4.17768	1.20693	5.4653	5e-05	0.000238134	Ups	ipo8	K18755	cellular_component:nuclear envelope(GO:0005635);cellular_component:cytosol(GO:0005829);biological_process:protein import into nucleus(GO:0006606);biological_process:intracellular protein transport(GO:0006886);biological_process:signal transduction(GO:0007165);molecular_function:Ran GTPase binding(GO:0008536);molecular_function:protein transporter activity(GO:0008565)
ENSDART00000128943	ENSDARG00000009626	24:33311910-33361719	1.18548	2.37191	1.00057	3.07273	0.0001	0.000458341	Ups	nrbp2b	K08875	molecular_function:protein kinase activity(GO:0004672);molecular_function:protein serine/threonine kinase activity(GO:0004674);molecular_function:ATP binding(GO:0005524);cellular_component:cytosol(GO:0005829);biological_process:protein phosphorylation(GO:0006468);biological_process:ER to Golgi vesicle-mediated transport(GO:0006888);cellular_component:endomembrane system(GO:0012505);biological_pro…
ENSDART00000128971	ENSDARG00000088439	14:25927109-25930546	37.1855	13.4136	-1.47104	-12.5366	5e-05	0.000238134	Down	gm2a	K12383	cellular_component:cellular_component(GO:0005575);biological_process:ganglioside catabolic process(GO:0006689);molecular_function:enzyme activator activity(GO:0008047)
ENSDART00000129075	ENSDARG00000090424	24:25547850-25550105	1.72027	3.57148	1.05389	4.03641	5e-05	0.000238134	Ups	camk2n2	_	biological_process:negative regulation of protein phosphorylation(GO:0001933);molecular_function:protein kinase inhibitor activity(GO:0004860);cellular_component:cellular_component(GO:0005575);biological_process:negative regulation of protein kinase activity(GO:0006469);molecular_function:protein kinase binding(GO:0019901)
ENSDART00000129131	ENSDARG00000091236	5:4135711-4138111	4.81357	1.66784	-1.52913	-2.22166	0.01025	0.0298838	Down	CABZ01058646.1	_	_
ENSDART00000129138	ENSDARG00000086481	23:45000522-45011046	10.1303	4.04007	-1.32623	-5.19122	5e-05	0.000238134	Down	mogat3a	K14457	cellular_component:cellular_component(GO:0005575);molecular_function:transferase activity, transferring acyl groups other than amino-acyl groups(GO:0016747)
ENSDART00000129205	ENSDARG00000005883	3:19001062-19050911	2.99339	6.49763	1.11813	8.6783	5e-05	0.000238134	Ups	rfx1a	K09173	molecular_function:RNA polymerase II core promoter proximal region sequence-specific DNA binding(GO:0000978);molecular_function:DNA binding(GO:0003677);molecular_function:sequence-specific DNA binding transcription factor activity(GO:0003700);cellular_component:nucleus(GO:0005634);cellular_component:nucleus(GO:0005634);biological_process:regulation of transcription, DNA-templated(GO:0006355);biol…
ENSDART00000129214	ENSDARG00000086341	20:49894060-49901801	159.89	64.7363	-1.30443	-14.2839	5e-05	0.000238134	Down	COX7A2 (1 of many)	_	_
ENSDART00000129252	ENSDARG00000059053	4:4795122-4917491	4.23302	2.09131	-1.01728	-2.37297	0.00085	0.00328059	Down	slc13a4	K14444	molecular_function:transporter activity(GO:0005215);cellular_component:integral component of plasma membrane(GO:0005887);biological_process:sodium ion transport(GO:0006814);molecular_function:sodium:sulfate symporter activity(GO:0015382);cellular_component:membrane(GO:0016020);cellular_component:integral component of membrane(GO:0016021);biological_process:transmembrane transport(GO:0055085)
ENSDART00000129295	ENSDARG00000086917	9:22316748-22528713	87.3048	214.699	1.29818	12.9891	5e-05	0.000238134	Ups	crygm2d2	_	_
ENSDART00000129398	ENSDARG00000045843	4:5325417-5655206	37.4618	12.3485	-1.60108	-9.71703	5e-05	0.000238134	Down	apex1	K10771	biological_process:heart looping(GO:0001947);molecular_function:DNA binding(GO:0003677);molecular_function:RNA binding(GO:0003723);molecular_function:DNA-(apurinic or apyrimidinic site) lyase activity(GO:0003906);molecular_function:DNA-(apurinic or apyrimidinic site) lyase activity(GO:0003906);molecular_function:nuclease activity(GO:0004518);molecular_function:endonuclease activity(GO:0004519);ce…
ENSDART00000129412	ENSDARG00000090975	7:26262937-26271227	3.80259	0.90785	-2.06646	-4.24319	5e-05	0.000238134	Down	si:dkey-62k3.5	_	_
ENSDART00000129511	ENSDARG00000014891	15:39249948-39384044	5.24542	13.3112	1.34351	12.1853	5e-05	0.000238134	Ups	robo2	_	biological_process:kidney development(GO:0001822);molecular_function:protein binding(GO:0005515);biological_process:axon guidance(GO:0007411);biological_process:axon guidance(GO:0007411);biological_process:axonal fasciculation(GO:0007413);biological_process:heart development(GO:0007507);cellular_component:membrane(GO:0016020);cellular_component:integral component of membrane(GO:0016021);biologica…
ENSDART00000129559	ENSDARG00000087517	13:34915885-34925891	0.89145	2.18846	1.29569	3.51271	0.00015	0.000666878	Ups	btbd3b	K10478	cellular_component:cytosol(GO:0005829);cellular_component:SCF ubiquitin ligase complex(GO:0019005);biological_process:cerebral cortex development(GO:0021987);biological_process:regulation of proteolysis(GO:0030162);molecular_function:ubiquitin protein ligase binding(GO:0031625);biological_process:protein ubiquitination involved in ubiquitin-dependent protein catabolic process(GO:0042787);biologic…
ENSDART00000129562	ENSDARG00000060298	13:36674295-36719113	8.5505	4.26309	-1.00411	-10.3145	5e-05	0.000238134	Down	nin	K16476	cellular_component:pericentriolar material(GO:0000242);biological_process:neural tube formation(GO:0001841);molecular_function:calcium ion binding(GO:0005509);cellular_component:centrosome(GO:0005813);cellular_component:centriole(GO:0005814);biological_process:midbrain-hindbrain boundary development(GO:0030917);biological_process:microtubule anchoring at centrosome(GO:0034454);biological_process:…
ENSDART00000129617	ENSDARG00000037153	23:26152925-26167637	27.9117	10.1016	-1.46629	-8.04397	5e-05	0.000238134	Down	atp6ap1b	K03662	biological_process:determination of left/right asymmetry in lateral mesoderm(GO:0003140);biological_process:retinal pigment epithelium development(GO:0003406);cellular_component:plasma membrane(GO:0005886);biological_process:eye pigment granule organization(GO:0008057);biological_process:ATP hydrolysis coupled proton transport(GO:0015991);cellular_component:membrane(GO:0016020);cellular_component…
ENSDART00000129627	ENSDARG00000096456	4:40515828-40522631	0.938712	2.42632	1.37001	3.11253	0.00045	0.00184244	Ups	si:dkeyp-82h4.3	_	_
ENSDART00000129725	ENSDARG00000086586	24:40072834-40074313	0.228073	0.635277	1.47789	1.82374	0.01695	0.0462241	Ups	BX323854.3	_	_
ENSDART00000129757	ENSDARG00000087585	10:384644-400401	0.504474	1.10782	1.13487	3.09181	0.00035	0.00146175	Ups	si:ch211-242f23.8	_	_
ENSDART00000129778	ENSDARG00000080016	4:72206749-72211616	1.58466	0.639425	-1.30932	-3.17094	0.00015	0.000666878	Down	CABZ01032454.1	_	_
ENSDART00000129864	ENSDARG00000088906	1:55850723-55856415	0.305332	0.858211	1.49095	3.00859	0.00125	0.00465378	Ups	CABZ01059404.1	_	_
ENSDART00000129911	ENSDARG00000039066	13:2303262-2315264	30.7601	13.2407	-1.21607	-4.45228	5e-05	0.000238134	Down	klhl31	K10467	molecular_function:ubiquitin-protein transferase activity(GO:0004842);biological_process:regulation of transcription, DNA-templated(GO:0006355);biological_process:skeletal muscle tissue development(GO:0007519);cellular_component:Cul3-RING ubiquitin ligase complex(GO:0031463)
ENSDART00000129970	ENSDARG00000086957	1:18610303-18638595	6.8797	2.47128	-1.47709	-11.2756	5e-05	0.000238134	Down	si:dkeyp-118a3.2	_	molecular_function:molecular_function(GO:0003674);biological_process:biological_process(GO:0008150);cellular_component:membrane(GO:0016020);cellular_component:integral component of membrane(GO:0016021)
ENSDART00000129985	ENSDARG00000087999	22:9753271-9761685	0.39387	1.42867	1.85888	4.54409	5e-05	0.000238134	Ups	si:dkey-286j17.3	_	_
ENSDART00000130012	ENSDARG00000090965	7:1168798-1211240	0.289935	0.636525	1.13449	2.22563	0.004	0.0130331	Ups	ripk3	K08847	molecular_function:nucleotide binding(GO:0000166);molecular_function:protein kinase activity(GO:0004672);molecular_function:protein serine/threonine kinase activity(GO:0004674);molecular_function:ATP binding(GO:0005524);biological_process:protein phosphorylation(GO:0006468);molecular_function:kinase activity(GO:0016301);biological_process:phosphorylation(GO:0016310);molecular_function:transferase…
ENSDART00000130042	ENSDARG00000086896	5:853580-881489	4.47924	19.6349	2.1321	8.35327	5e-05	0.000238134	Ups	fubp3	K13210	molecular_function:nucleic acid binding(GO:0003676);molecular_function:RNA binding(GO:0003723);cellular_component:cellular_component(GO:0005575);biological_process:biological_process(GO:0008150)
ENSDART00000130053	ENSDARG00000090346	24:23843795-23853447	2.64109	1.27211	-1.05391	-6.32083	5e-05	0.000238134	Down	CT574587.1	_	_
ENSDART00000130126	ENSDARG00000090942	4:70966536-70982009	0.790886	2.15795	1.44812	5.30829	5e-05	0.000238134	Ups	CABZ01054394.3	_	_
ENSDART00000130286	ENSDARG00000089489	11:39839568-39864577	3.09609	1.43642	-1.10797	-1.82331	0.01635	0.044856	Down	fam83e	_	_
ENSDART00000130305	ENSDARG00000013834	22:38964908-39006596	0.310617	0.816968	1.39514	1.96995	0.0124	0.0352579	Ups	arhgef3	_	molecular_function:guanyl-nucleotide exchange factor activity(GO:0005085);molecular_function:Rho guanyl-nucleotide exchange factor activity(GO:0005089);biological_process:hemopoiesis(GO:0030097);biological_process:regulation of Rho protein signal transduction(GO:0035023);biological_process:intracellular signal transduction(GO:0035556);biological_process:myeloid cell development(GO:0061515)
ENSDART00000130317	ENSDARG00000089326	9:29709949-29733974	0.129502	1.38486	3.4187	5.35183	5e-05	0.000238134	Ups	arhgap20	K20641	molecular_function:GTPase activator activity(GO:0005096);biological_process:signal transduction(GO:0007165)
ENSDART00000130343	ENSDARG00000042496	18:12495742-13088281	0.868887	0.394764	-1.13818	-2.07193	0.0037	0.0121604	Down	parp12a	K15259	molecular_function:NAD+ ADP-ribosyltransferase activity(GO:0003950);molecular_function:metal ion binding(GO:0046872)
ENSDART00000130472	ENSDARG00000091116	19:23266333-23335441	4.34044	1.69857	-1.35352	-13.3914	5e-05	0.000238134	Down	pkhd1l1	_	cellular_component:membrane(GO:0016020);cellular_component:integral component of membrane(GO:0016021)
ENSDART00000130491	ENSDARG00000055554	23:27725128-27731964	2.44121	1.1853	-1.04234	-3.10342	5e-05	0.000238134	Down	wnt1	K03209	molecular_function:receptor binding(GO:0005102);molecular_function:frizzled binding(GO:0005109);cellular_component:extracellular region(GO:0005576);cellular_component:proteinaceous extracellular matrix(GO:0005578);cellular_component:extracellular space(GO:0005615);biological_process:multicellular organismal development(GO:0007275);biological_process:nervous system development(GO:0007399);biologic…
ENSDART00000130632	ENSDARG00000044550	21:27240989-27376599	6.12989	2.92257	-1.06862	-3.64233	5e-05	0.000238134	Down	hif1al2	_	molecular_function:sequence-specific DNA binding RNA polymerase II transcription factor activity(GO:0000981);cellular_component:nucleus(GO:0005634);biological_process:transcription, DNA-templated(GO:0006351);biological_process:regulation of transcription, DNA-templated(GO:0006355);biological_process:positive regulation of transcription from RNA polymerase II promoter(GO:0045944);molecular_functio…
ENSDART00000130675	ENSDARG00000033666	1:54059701-54077905	2.87316	1.30459	-1.13904	-3.81762	5e-05	0.000238134	Down	pi4k2a	K13711	molecular_function:nucleotide binding(GO:0000166);molecular_function:1-phosphatidylinositol 4-kinase activity(GO:0004430);molecular_function:1-phosphatidylinositol 4-kinase activity(GO:0004430);molecular_function:ATP binding(GO:0005524);molecular_function:ATP binding(GO:0005524);cellular_component:mitochondrion(GO:0005739);cellular_component:mitochondrion(GO:0005739);cellular_component:endosome(G…
ENSDART00000130740	ENSDARG00000090901	3:58138192-58149447	0.646187	1.38862	1.10362	3.37359	0.00015	0.000666878	Ups	si:ch211-256e16.11	_	_
ENSDART00000130853	ENSDARG00000009214	12:33793491-33814140	5.71134	2.30377	-1.30983	-2.79306	5e-05	0.000238134	Down	mfsd13a	_	molecular_function:molecular_function(GO:0003674);biological_process:biological_process(GO:0008150);cellular_component:membrane(GO:0016020);cellular_component:integral component of membrane(GO:0016021)
ENSDART00000131134	ENSDARG00000024619	19:15666927-15716605	2.183	6.34471	1.53924	10.903	5e-05	0.000238134	Ups	si:ch211-206a7.2	_	molecular_function:sequence-specific DNA binding RNA polymerase II transcription factor activity(GO:0000981);molecular_function:DNA binding(GO:0003677);molecular_function:sequence-specific DNA binding transcription factor activity(GO:0003700);cellular_component:nucleus(GO:0005634);cellular_component:nucleus(GO:0005634);biological_process:transcription, DNA-templated(GO:0006351);biological_process…
ENSDART00000131143	ENSDARG00000036031	10:44089328-44117231	2.03526	8.03485	1.98106	5.74274	5e-05	0.000238134	Ups	sept5b	K04557	molecular_function:nucleotide binding(GO:0000166);molecular_function:GTP binding(GO:0005525);cellular_component:synaptic vesicle(GO:0008021);biological_process:regulation of exocytosis(GO:0017157)
ENSDART00000131230	ENSDARG00000038859	2:30773095-30800969	1.88776	3.79899	1.00894	2.30394	0.0022	0.00769893	Ups	rgs20	K16449	molecular_function:GTPase activator activity(GO:0005096);cellular_component:cytoplasmic microtubule(GO:0005881);cellular_component:plasma membrane(GO:0005886);cellular_component:cell cortex(GO:0005938);biological_process:regulation of transcription, DNA-templated(GO:0006355);molecular_function:beta-catenin binding(GO:0008013);biological_process:cell death(GO:0008219);biological_process:dorsal/ven…
ENSDART00000131351	ENSDARG00000045089	13:20248409-20250503	4.93903	10.9038	1.14254	4.78424	5e-05	0.000238134	Ups	si:ch211-270n8.1	_	_
ENSDART00000131411	ENSDARG00000003517	2:27027278-27033274	6.16849	14.4123	1.22431	3.3471	0.0001	0.000458341	Ups	impa1	_	molecular_function:magnesium ion binding(GO:0000287);cellular_component:cytoplasm(GO:0005737);biological_process:inositol metabolic process(GO:0006020);biological_process:signal transduction(GO:0007165);molecular_function:inositol monophosphate 1-phosphatase activity(GO:0008934);biological_process:phosphatidylinositol phosphorylation(GO:0046854);biological_process:inositol phosphate dephosphoryla…
ENSDART00000131419	ENSDARG00000045914	4:149699-340476	2.44462	5.74312	1.23223	1.9364	0.0064	0.0197597	Ups	si:ch211-51e12.7	_	molecular_function:molecular_function(GO:0003674);cellular_component:cellular_component(GO:0005575);biological_process:biological_process(GO:0008150)
ENSDART00000131478	ENSDARG00000008140	18:34386583-34559550	0.786066	0.24706	-1.66979	-2.54548	0.00685	0.0209957	Down	kcnab1a	K04882	molecular_function:voltage-gated potassium channel activity(GO:0005249);cellular_component:cytoplasm(GO:0005737);biological_process:potassium ion transport(GO:0006813);cellular_component:integral component of membrane(GO:0016021);biological_process:transmembrane transport(GO:0055085)
ENSDART00000131508	ENSDARG00000031483	13:38993569-39046663	196.629	82.593	-1.25139	-35.7466	5e-05	0.000238134	Down	col9a1b	K08131	cellular_component:collagen trimer(GO:0005581)
ENSDART00000131616	ENSDARG00000011553	8:25288863-25319570	2.03377	0.449611	-2.1774	-2.69712	0.0013	0.00482057	Down	atp5f1	K02127	cellular_component:mitochondrial proton-transporting ATP synthase complex, coupling factor F(o)(GO:0000276);cellular_component:mitochondrial proton-transporting ATP synthase complex, coupling factor F(o)(GO:0000276);molecular_function:hydrogen ion transmembrane transporter activity(GO:0015078);biological_process:ATP synthesis coupled proton transport(GO:0015986);biological_process:ATP synthesis c…
ENSDART00000131642	ENSDARG00000043843	20:2402636-2462287	23.9968	10.2461	-1.22777	-5.05406	5e-05	0.000238134	Down	akap7	_	cellular_component:cytosol(GO:0005829);biological_process:protein localization(GO:0008104);biological_process:regulation of protein kinase A signaling(GO:0010738);molecular_function:protein kinase A regulatory subunit binding(GO:0034237)
ENSDART00000131663	ENSDARG00000039892	17:15205562-15212007	7.7788	1.78254	-2.12561	-2.56471	0.00515	0.0162871	Down	gnpnat1	_	molecular_function:glucosamine 6-phosphate N-acetyltransferase activity(GO:0004343);cellular_component:cellular_component(GO:0005575);biological_process:UDP-N-acetylglucosamine biosynthetic process(GO:0006048);molecular_function:N-acetyltransferase activity(GO:0008080)
ENSDART00000131673	ENSDARG00000005010	13:44681542-44682350	3.20497	1.14239	-1.48825	-3.02698	0.00115	0.00432461	Down	si:dkeyp-2e4.8	_	molecular_function:nucleic acid binding(GO:0003676);molecular_function:metal ion binding(GO:0046872)
ENSDART00000131739	ENSDARG00000092379	8:2420318-2423422	1.84863	0.63288	-1.54646	-2.28498	0.0099	0.0290105	Down	si:dkeyp-51b9.3	_	biological_process:microtubule-based process(GO:0007017);cellular_component:dynein complex(GO:0030286)
ENSDART00000131758	ENSDARG00000025436	3:18648690-18655554	4.42606	2.16297	-1.03301	-2.44155	0.00265	0.0090748	Down	msrb1a	K07305	biological_process:immune system process(GO:0002376);molecular_function:actin binding(GO:0003779);cellular_component:nucleus(GO:0005634);cellular_component:cytoplasm(GO:0005737);cellular_component:cytoskeleton(GO:0005856);biological_process:response to oxidative stress(GO:0006979);molecular_function:peptide-methionine (S)-S-oxide reductase activity(GO:0008113);cellular_component:actin cytoskeleto…
ENSDART00000131809	ENSDARG00000074201	23:19827578-19882684	12.5408	5.47475	-1.19577	-2.81138	5e-05	0.000238134	Down	flna	_	molecular_function:actin binding(GO:0003779);molecular_function:actin filament binding(GO:0051015)
ENSDART00000131854	ENSDARG00000093173	21:6046444-6054599	1.08609	0.386374	-1.49107	-3.16732	0.00065	0.00256625	Down	si:dkey-93m18.6	_	_
ENSDART00000131883	ENSDARG00000043818	12:20569435-20664472	1.63038	0.705549	-1.20839	-1.8192	0.00645	0.0198906	Down	CASKIN2	_	_
ENSDART00000131908	ENSDARG00000040838	9:35129130-35136397	0.733264	3.30779	2.17346	2.22397	0.00795	0.0239057	Ups	dcun1d2a	_	cellular_component:ubiquitin ligase complex(GO:0000151);molecular_function:ubiquitin conjugating enzyme binding(GO:0031624);molecular_function:ubiquitin-like protein binding(GO:0032182);biological_process:protein neddylation(GO:0045116);biological_process:positive regulation of ubiquitin-protein transferase activity(GO:0051443);molecular_function:cullin family protein binding(GO:0097602)
ENSDART00000131965	ENSDARG00000093381	18:18842575-18860931	1.06905	0.364743	-1.55137	-2.42664	0.0044	0.0141964	Down	tgm2l	K05625	molecular_function:protein-glutamine gamma-glutamyltransferase activity(GO:0003810);biological_process:peptide cross-linking(GO:0018149);molecular_function:metal ion binding(GO:0046872)
ENSDART00000131972	ENSDARG00000093569	3:16091183-16140026	22.821	8.65028	-1.39955	-9.23609	5e-05	0.000238134	Down	bckdhbl	_	_
ENSDART00000132027	ENSDARG00000075393	13:29924670-30001389	3.95418	11.4941	1.53944	7.27703	5e-05	0.000238134	Ups	spock2	_	molecular_function:calcium ion binding(GO:0005509);cellular_component:proteinaceous extracellular matrix(GO:0005578);biological_process:signal transduction(GO:0007165)
ENSDART00000132029	ENSDARG00000086917	9:22316748-22528713	1.5523	3.77442	1.28185	1.86293	0.01595	0.0439011	Ups	crygm2d2	_	_
ENSDART00000132081	ENSDARG00000008867	4:18863844-18950362	13.8965	4.21242	-1.722	-3.75008	5e-05	0.000238134	Down	rap1b	K07836	molecular_function:nucleotide binding(GO:0000166);biological_process:somitogenesis(GO:0001756);biological_process:chondrocyte intercalation involved in growth plate cartilage morphogenesis(GO:0003428);molecular_function:MAP kinase kinase activity(GO:0004708);molecular_function:GTP binding(GO:0005525);cellular_component:cytoplasm(GO:0005737);cellular_component:cytosol(GO:0005829);cellular_componen…
ENSDART00000132103	ENSDARG00000093444	10:17130296-17142855	1.6737	0.590399	-1.50327	-3.6509	5e-05	0.000238134	Down	si:dkey-106l3.7	_	_
ENSDART00000132209	ENSDARG00000036100	19:25307523-25332674	0.921901	0.247104	-1.89949	-2.8681	0.0011	0.0041589	Down	eya3	K17621	molecular_function:phosphoprotein phosphatase activity(GO:0004721);molecular_function:protein tyrosine phosphatase activity(GO:0004725);molecular_function:protein tyrosine phosphatase activity(GO:0004725);cellular_component:nucleus(GO:0005634);cellular_component:transcription factor complex(GO:0005667);biological_process:transcription, DNA-templated(GO:0006351);biological_process:regulation of tr…
ENSDART00000132228	ENSDARG00000039392	4:8036934-8146942	7.04726	2.0355	-1.79168	-2.48987	0.00225	0.00785477	Down	wnk1b	_	biological_process:angiogenesis(GO:0001525);molecular_function:protein kinase activity(GO:0004672);molecular_function:protein serine/threonine kinase activity(GO:0004674);molecular_function:protein serine/threonine kinase activity(GO:0004674);molecular_function:ATP binding(GO:0005524);cellular_component:cytosol(GO:0005829);biological_process:protein phosphorylation(GO:0006468);molecular_function:…
ENSDART00000132323	ENSDARG00000029105	4:74900735-74907791	1.39254	3.08627	1.14815	3.89274	5e-05	0.000238134	Ups	ftr51	_	cellular_component:intracellular(GO:0005622);molecular_function:zinc ion binding(GO:0008270);molecular_function:metal ion binding(GO:0046872)
ENSDART00000132387	ENSDARG00000009311	3:24230547-24304357	1.95459	4.94054	1.3378	4.06607	5e-05	0.000238134	Ups	pvalb6	_	molecular_function:calcium ion binding(GO:0005509);cellular_component:cellular_component(GO:0005575);molecular_function:metal ion binding(GO:0046872)
ENSDART00000132393	ENSDARG00000017165	13:10516593-10540063	1.43862	0.68965	-1.06075	-3.95892	5e-05	0.000238134	Down	slc3a1	K14210	molecular_function:catalytic activity(GO:0003824);biological_process:carbohydrate metabolic process(GO:0005975);cellular_component:membrane(GO:0016020);cellular_component:integral component of membrane(GO:0016021)
ENSDART00000132501	ENSDARG00000061062	9:41657971-41679863	4.60556	2.04576	-1.17074	-2.55662	0.00055	0.00220876	Down	nemp2	_	cellular_component:nuclear envelope(GO:0005635);cellular_component:membrane(GO:0016020);cellular_component:integral component of membrane(GO:0016021)
ENSDART00000132609	ENSDARG00000017525	23:35551967-35565702	4.16933	1.90375	-1.13097	-2.02821	0.00455	0.0146196	Down	ccnt1	_	cellular_component:cyclin-dependent protein kinase holoenzyme complex(GO:0000307);cellular_component:nucleus(GO:0005634);biological_process:transcription, DNA-templated(GO:0006351);molecular_function:cyclin-dependent protein serine/threonine kinase regulator activity(GO:0016538);biological_process:positive regulation of cyclin-dependent protein serine/threonine kinase activity(GO:0045737);biologi…
ENSDART00000132626	ENSDARG00000071673	24:20305605-20387394	1.99197	5.35159	1.42577	2.25599	0.00275	0.00937924	Ups	ctdspla	_	molecular_function:phosphoprotein phosphatase activity(GO:0004721);cellular_component:cellular_component(GO:0005575);molecular_function:phosphatase activity(GO:0016791)
ENSDART00000132638	ENSDARG00000059948	1:51630005-51658110	1.53586	0.675868	-1.18424	-2.12651	0.0112	0.0323126	Down	HS3ST6	K09679	molecular_function:N-acetylglucosamine 6-O-sulfotransferase activity(GO:0001517);molecular_function:N-acetylgalactosamine 4-O-sulfotransferase activity(GO:0001537);molecular_function:heparan sulfate 2-O-sulfotransferase activity(GO:0004394);molecular_function:sulfotransferase activity(GO:0008146);molecular_function:HNK-1 sulfotransferase activity(GO:0016232);molecular_function:transferase activit…
ENSDART00000132749	ENSDARG00000095674	18:37291559-37300158	6.50274	2.98732	-1.12219	-3.71576	5e-05	0.000238134	Down	tmem123	_	cellular_component:membrane(GO:0016020);cellular_component:integral component of membrane(GO:0016021)
ENSDART00000132754	ENSDARG00000090912	17:43031044-43041345	2.39107	5.36379	1.16559	2.48183	0.00155	0.00564705	Ups	npc2	K13443	cellular_component:extracellular region(GO:0005576);cellular_component:endoplasmic reticulum(GO:0005783);biological_process:lipid metabolic process(GO:0006629);biological_process:steroid metabolic process(GO:0008202);biological_process:cholesterol metabolic process(GO:0008203)
ENSDART00000132835	ENSDARG00000073814	20:48863964-48870376	1.34134	2.9071	1.11591	3.67975	5e-05	0.000238134	Ups	pax1b	_	molecular_function:DNA binding(GO:0003677);molecular_function:protein binding(GO:0005515);cellular_component:nucleus(GO:0005634);biological_process:transcription, DNA-templated(GO:0006351);biological_process:regulation of transcription, DNA-templated(GO:0006355);biological_process:multicellular organismal development(GO:0007275);biological_process:pectoral fin development(GO:0033339);biological_p…
ENSDART00000132858	ENSDARG00000042848	17:31197226-31212008	2.15303	4.66277	1.11482	3.69407	5e-05	0.000238134	Ups	pcmtl	K00573	molecular_function:protein-L-isoaspartate (D-aspartate) O-methyltransferase activity(GO:0004719);molecular_function:protein-L-isoaspartate (D-aspartate) O-methyltransferase activity(GO:0004719);cellular_component:cytoplasm(GO:0005737);biological_process:cellular protein modification process(GO:0006464);molecular_function:methyltransferase activity(GO:0008168);molecular_function:transferase activi…
ENSDART00000132919	ENSDARG00000041382	16:5750313-5772236	0	1.27386	inf	-nan	5e-05	0.000238134	Ups	si:dkey-283b15.2	_	cellular_component:extracellular region(GO:0005576);molecular_function:metal ion binding(GO:0046872)
ENSDART00000132958	ENSDARG00000019986	1:19142865-19152602	42.7615	8.44178	-2.34069	-5.12993	5e-05	0.000238134	Down	grhprb	K00049	cellular_component:cytosol(GO:0005829);biological_process:metabolic process(GO:0008152);molecular_function:oxidoreductase activity(GO:0016491);molecular_function:oxidoreductase activity, acting on the CH-OH group of donors, NAD or NADP as acceptor(GO:0016616);molecular_function:hydroxypyruvate reductase activity(GO:0016618);molecular_function:glyoxylate reductase (NADP) activity(GO:0030267);molec…
ENSDART00000133071	ENSDARG00000069855	16:32710319-32718853	4.82776	10.3308	1.09752	2.83851	0.0005	0.00202494	Ups	pnisr	_	_
ENSDART00000133096	ENSDARG00000037000	6:7271443-7281620	7.32249	2.29891	-1.67139	-2.19559	0.00295	0.0099644	Down	fkbp11	_	molecular_function:peptidyl-prolyl cis-trans isomerase activity(GO:0003755);molecular_function:FK506 binding(GO:0005528);cellular_component:endoplasmic reticulum membrane(GO:0005789);biological_process:protein folding(GO:0006457);cellular_component:membrane(GO:0016020);cellular_component:integral component of membrane(GO:0016021);biological_process:chaperone-mediated protein folding(GO:0061077);b…
ENSDART00000133159	ENSDARG00000092099	19:3187013-3303462	1.18766	3.15621	1.41007	2.18016	0.01495	0.0415024	Ups	si:ch211-133n4.6	_	_
[truncated: 1,250 more rows]
